# Supplementary material for: NAL8 encodes a prohibitin that contributes to leaf and spikelet development by regulating mitochondria and chloroplasts stability in rice
Source: BMC Plant Biol. 2019 Sep 11;19:395. doi: 10.1186/s12870-019-2007-4 (PMC6737680; doi:10.1186/s12870-019-2007-4)
Supplement: Supplementary file 18 — Table S2. All proteins identified by proteomics analysis. (XLSX 680 kb) [file 12870_2019_2007_MOESM18_ESM.xlsx]

## Sheet: up.TQ_vs_nal8
TQ vs nal8 up Column A: id, unique identifier assigned. Column B: Protein IDs, protein identifiers. Column C: Majority protein IDs, Majority protein identifiers. Column D: Protein names, protein names. Column E: Gene name, protein associated gene names. Column F~J: Statistics results. Column K~P: LFQ intensity, label-free quantitative intensity of each sample. Column Q~V: log10 transformed and qu…
Protein Information					Statictics results					LFQ intensity						log10 transformed and quantile normalized LFQ intensity
id	Protein IDs	Majority protein IDs	Protein names	Gene names	Fold Change	P-value	Regulation	group TQ	group nal8	LFQ intensity TQ-1	LFQ intensity TQ-2	LFQ intensity TQ-3	LFQ intensity nal8-1	LFQ intensity nal8-2	LFQ intensity nal8-3	LFQ intensity TQ-1	LFQ intensity TQ-2	LFQ intensity TQ-3	LFQ intensity nal8-1	LFQ intensity nal8-2	LFQ intensity nal8-3
2	Q69SG5;B9G4R5;B8BDV4;A0A0E0IMU3;A0A067Y1U2	Q69SG5;B9G4R5;B8BDV4;A0A0E0IMU3;A0A067Y1U2	Endoglucanase 24;Uncharacterized protein;Uncharacterized protein;Uncharacterized protein;Cellulase	Os09g0533900 LOC_Os09g36350 OJ1112_E07.17-1;OsI_32163;OsJ_30126	121.611	1.47785e-09	up	7.92613	1	105150000	122680000	124540000	0	0	0	7.87609	7.93164	7.97067	1	1	1
3	Q01859;A0A067Y2M2;A0A0E0HHW0;B9FLI4;B8AWF8;A0A0P0WQ12	Q01859;A0A067Y2M2;A0A0E0HHW0;B9FLI4;B8AWF8;A0A0P0WQ12	ATP synthase subunit beta, mitochondrial;ATP synthase subunit beta;ATP synthase subunit beta;ATP synthase subunit beta;ATP synthase subunit beta;Os05g0553000 protein (Fragment)	ATPB Os05g0553000 LOC_Os05g47980 OJ1263_E10.1 OSJNBa0079H23.20;Os05g0553000 OSNPB_050553000;OsI_20905;OsJ_19476	1.08985	0.0683392	up	9.93816	9.81402	10903000000	10288000000	13621000000	5900600000	5582400000	5597600000	9.87123	9.93225	10.011	9.87123	9.79817	9.77266
6	Q5JLH8;B8A9P0;A0A097NUQ1;A0A0E0FMR0;A0A0E0FMR1;A0A0E0FMQ9	Q5JLH8;B8A9P0;A0A097NUQ1;A0A0E0FMR0;A0A0E0FMR1;A0A0E0FMQ9	Os01g0534900 protein;Uncharacterized protein;Hyperosmolality-gated Ca2+ permeable channel 1.1;Uncharacterized protein;Uncharacterized protein;Uncharacterized protein	Os01g0534900 Os01g0534900 OJ1029_F04.29 OsJ_02101 OSNPB_010534900;OSCA1.1;OsI_02298	1.06222	0.979348	up	5.5149	5.42781	0	91262000	79831000	25962000	0	31470000	1	7.80339	7.74132	7.58024	1	7.7032
7	Q6ZLQ0;A2YI72;A0A097NUT9;A3BGL5;A0A0E0JBR5	Q6ZLQ0;A2YI72;A0A097NUT9;A3BGL5;A0A0E0JBR5	Os07g0150100 protein;Uncharacterized protein;Hyperosmolality-gated Ca2+ permeable channel 3.1;Uncharacterized protein;Uncharacterized protein	Os07g0150100 OJ1027_G06.20 OSNPB_070150100;OSCA3.1;OsI_24908;OsJ_23104	153.367	9.14661e-11	up	8.26084	1	255330000	223990000	228300000	0	0	0	8.28816	8.23957	8.25479	1	1	1
8	Q9LI00;A0A0E0HJT5;A0A0B4U151;Q5VS01;A0A0N7KLE5;B8B1K3;B8B1K2	Q9LI00;A0A0E0HJT5;A0A0B4U151;Q5VS01;A0A0N7KLE5;B8B1K3	6-phosphogluconate dehydrogenase, decarboxylating 1;6-phosphogluconate dehydrogenase, decarboxylating;6-phosphogluconate dehydrogenase, decarboxylating (Fragment);6-phosphogluconate dehydrogenase, decarboxylating;6-phosphogluconate dehydrogenase, decarboxy	G6PGH1 Os06g0111500 LOC_Os06g02144 OsJ_19864 P0029D06.14-1;LOC_Os06g02144.1;Os06g0111500 OSNPB_060111500;OsI_21344;OsI_21345;P0029D06.14-2	1.13805	0.0986048	up	8.06471	7.87815	129080000	190320000	153870000	66763000	39542000	60961000	7.98137	8.1579	8.05487	7.96106	7.73827	7.93514
9	Q9LLR2;Q9FRX7;A2YBK1;A0A0E0HNX1;A0A0B4U1V7;A0A0P0WVJ1	Q9LLR2;Q9FRX7;A2YBK1;A0A0E0HNX1;A0A0B4U1V7;A0A0P0WVJ1	Aldehyde dehydrogenase;Aldehyde dehydrogenase ALDH2b;Uncharacterized protein;Uncharacterized protein;Aldehyde dehydrogenase (Fragment);Os06g0270900 protein (Fragment)	Aldh;Aldh2b Os06g0270900 OsJ_20928 OSJNBa0084K06.38 OSNPB_060270900;LOC_Os06g15990.1;Os06g0270900 OSNPB_060270900;OsI_22484	1.66823	0.00568556	up	8.57143	7.83311	469920000	475110000	439240000	33370000	36254000	97575000	8.57388	8.58669	8.55371	7.69043	7.7032	8.1057
11	B9G4P3;B8BDS9;A0A0B4U2B5;Q69NG5;A2Z3C4;A0A0E0IMP6	B9G4P3;B8BDS9;A0A0B4U2B5;Q69NG5;A2Z3C4;A0A0E0IMP6	Os09g0529100 protein;Uncharacterized protein;6-phosphogluconolactonase (Fragment);Probable 6-phosphogluconolactonase 4, chloroplastic;Probable 6-phosphogluconolactonase 4, chloroplastic;Uncharacterized protein	LOC_Os09g35970.1;Os09g0529100 LOC_Os09g35970 OJ1531_B07.11 OsJ_028924;Os09g0529100 OsJ_30091 OSNPB_090529100;OsI_031067;OsI_32125	1.98818	0.373901	up	1.99145	1	0	0	9110000	0	0	0	1	1	3.97435	1	1	1
12	Q2QS13;B8BPH5;A0A0E0J9V3;A0A0B4U2C3	Q2QS13;B8BPH5;A0A0E0J9V3;A0A0B4U2C3	UDP-glucose 6-dehydrogenase 5;UDP-glucose 6-dehydrogenase;UDP-glucose 6-dehydrogenase;UDP-glucose 6-dehydrogenase (Fragment)	LOC_Os12g25700.1;OsI_38225;UGD5 Os12g0443600 LOC_Os12g25700 OsJ_35986	4.3898	0.116127	up	3.13415	1	26886000	24531000	0	0	0	0	4.218	4.18446	1	1	1	1
13	A0A0E0L834;Q5VMA5;A0A1V1H7R9;A0A1V1H7L7;A0A1V1H6P3;A0A1V1H5H3;A0A1V1H158;A0A1V1H0X2;A0A1V1H0T7;A0A0E0PTR3;A0A0E0HL42;A0A0E0A5B2;A2Y9J6;A3B8J3;Q5QNJ0;A0A1V1H271;B8AAJ1	A0A0E0L834;Q5VMA5;A0A1V1H7R9;A0A1V1H7L7;A0A1V1H6P3;A0A1V1H5H3;A0A1V1H158;A0A1V1H0X2;A0A1V1H0T7;A0A0E0PTR3;A0A0E0HL42;A0A0E0A5B2;A2Y9J6;A3B8J3;Q5QNJ0;A0A1V1H271;B8AAJ1	Putative esterase;Os06g0156600 protein;Putative esterase;Putative esterase;Putative esterase;Putative esterase;Putative esterase;Putative esterase;Putative esterase;Putative esterase;Uncharacterized protein;Putative esterase;Uncharacterized protein;Unchara	GL0029M03.16;K0219D02.20;OA_ABa0037F23.2;OA_BBa0050L12.5;OBARTa0026G07.16;OG_ABa0185B04.4;Ogla0005M11.19;OM_Ba0009C22.4;OO_Ba0014A07.29;OP_Ba0021N11.17;ORUFIa0053F24.1 OR_BBa0045E22.24 OR_CBa0004O24.22;Os01g0214600 Os01g0214600 OSJNBa0038J17.33 OSNPB_010214600 P0515G01.11;Os06g0156600 KMK0024M20.9 Os06g0156600 OSJNBa0085L11.37 OSNPB_060156600 P0046E09.15;OsI_00887;OsI_21741;OsJ_20183	18.6624	0.116122	up	5.22206	1	34336000	39028000	0	0	0	0	7.30971	7.35648	1	1	1	1
14	A0A0E0FEV8;B8AG76;Q67WH9;B9FQ48;Q67WH6;A0A0P0WZ54;A0A0E0FEV7;A2YFG2;Q0DAP6;A2YFG3;B9FQ45	A0A0E0FEV8;B8AG76;Q67WH9	Uncharacterized protein;Uncharacterized protein;Os06g0639800 protein	Os06g0639800 Os06g0639800 OSNPB_060639800 P0458E02.18;Os06g0640100;Os06g0640100 OSNPB_060640100;OsI_06911;OsI_23847;OsI_23848;OsJ_22108;OsJ_22111;P0458E02.22	87.704	1.23448e-08	up	7.45457	1	42939000	40419000	54420000	0	0	0	7.43983	7.38773	7.53615	1	1	1
17	Q9FTY4;A2WJP2;A0A0E0FEZ5;A2ZNA8	Q9FTY4;A2WJP2;A0A0E0FEZ5;A2ZNA8	Os01g0104400 protein;Uncharacterized protein;Uncharacterized protein;Uncharacterized protein	Os01g0104400 OSNPB_010104400 P0436E04.19;OsI_00040;OsJ_00036	4.01021	0.116159	up	3.00368	1	11877000	9212400	0	0	0	0	4.03669	3.97435	1	1	1	1
19	Q8W250;A2WJR2;A0A0E0FF26	Q8W250;A2WJR2;A0A0E0FF26	1-deoxy-D-xylulose 5-phosphate reductoisomerase, chloroplastic;Uncharacterized protein;Uncharacterized protein	DXR Os01g0106900 LOC_Os01g01710 OsJ_00058 P0005A05.24 P0482C06.2;OsI_00059	2.33274	0.116147	up	2.22203	1	3282700	3120600	0	0	0	0	2.8169	2.84918	1	1	1	1
20	A0A0E0FF27;Q657X8;A0A0P0UX24;A2WJR3	A0A0E0FF27;Q657X8;A0A0P0UX24;A2WJR3	Uncharacterized protein;Os01g0107000 protein;Os01g0107000 protein;Uncharacterized protein	Os01g0107000 OSNPB_010107000;OsI_00060;P0005A05.25-1 P0482C06.3-1 Os01g0107000 OsJ_00059 OSNPB_010107000	77.1175	3.45582e-07	up	7.26899	1	29979000	36592000	41920000	0	0	0	7.08375	7.31078	7.41243	1	1	1
21	A0A0E0FF60;Q9ASK5;B8ACV4;A0A0E0FF59	A0A0E0FF60;Q9ASK5;B8ACV4;A0A0E0FF59	Uncharacterized protein;Os01g0110400 protein;Uncharacterized protein;Uncharacterized protein	Os01g0110400 Os01g0110400 OsJ_00082 OSNPB_010110400 P0439B06.9;OsI_00091	3.0104	0.140632	up	2.58996	1	2950600	0	9417300	0	0	0	2.78523	1	3.98463	1	1	1
22	Q94JJ0;A0A0E0FFG0;B8ACY2;B9EZ83	Q94JJ0;A0A0E0FFG0;B8ACY2;B9EZ83	Fructose-bisphosphate aldolase;Fructose-bisphosphate aldolase;Uncharacterized protein;Fructose-bisphosphate aldolase	Os01g0118000 OSNPB_010118000 P0494A10.15;OsI_00149;OsJ_00159	1.35339	4.90822e-06	up	8.18458	7.748	201040000	198350000	189680000	35969000	41042000	37310000	8.19547	8.18476	8.17352	7.72596	7.75321	7.76484
23	B9EZ87;Q0JR50;A0A0P0UXB1;B8ACY6;A0A0E0FFG7;Q5ZDT4	B9EZ87;Q0JR50;A0A0P0UXB1;B8ACY6;A0A0E0FFG7;Q5ZDT4	Uncharacterized protein;Os01g0119100 protein (Fragment);Os01g0119100 protein;Uncharacterized protein;Uncharacterized protein;Putative HGA6	Os01g0119100;Os01g0119100 OSNPB_010119100;OsI_00156;OsJ_00166;P0494A10.30 P0698A04.14	1.50175	0.373901	up	1.58665	1	2722400	0	0	0	0	0	2.75994	1	1	1	1	1
26	Q9ARU4;B8ACZ8;A0A0E0FFI8	Q9ARU4;B8ACZ8;A0A0E0FFI8	Os01g0121700 protein;Uncharacterized protein;Uncharacterized protein	Os01g0121700 Os01g0121700 OsJ_00183 OSNPB_010121700 P0445D12.4;OsI_00178	48.8183	0.00168703	up	6.60935	1	31475000	29749000	48632000	0	0	0	7.22137	5.12217	7.48452	1	1	1
29	A0A0E0FG66;P48494;E0X6V4;B8AD93;A0A218KL52;A0A0E0FG65;A6N0S2;A6MZQ1;I1VVT7;I1VVU1;I1VVT8	A0A0E0FG66;P48494;E0X6V4;B8AD93;A0A218KL52;A0A0E0FG65;A6N0S2;A6MZQ1	50S ribosomal protein L33, chloroplastic;Triosephosphate isomerase, cytosolic;Triosephosphate isomerase;Uncharacterized protein;Triosephosphate isomerase;50S ribosomal protein L33, chloroplastic;Triosephosphate isomerase, cytosolic (Fragment);40S ribosomal	OsI_00389;Rict;rpl33;TPI Os01g0147900 LOC_Os01g05490 OsJ_00367 P0416D03.45 P0434B04.9	4.90167	0.403099	up	8.19016	5.89689	198100000	212180000	187020000	356260000	0	81321000	8.19101	8.21678	8.16269	8.65149	1	8.03917
30	Q6F362;A2Y7R3;A0A0E0HIT7;Q9LGI2;Q94JJ7;Q94JJ4;Q7GBK0;B9A1G8;B9A1G6;A2WKS8;A2WKS3;A2WKP5;A2WKP3;A0A0E0FGD0;A0A0E0FG86;A0A0E0FG84;Q94JE1;A2WKT4;A0A0E0FGD7;A0A0E0FGB4;Q943L2;A2WWU2;A0A0E0FVL2;Q6ZBP3;A2YWI3;A0A0E0FGC8;A3AGM4;A2XF66;A0A0E0FLV8;A0A0E0IDM9;Q9LGH8;Q9LGH4;A2WKT1;A2WKS5;A0A0E0FGD2;A0A0P0XHD8;B8AZ01;A0A0P0WN72;A0A0E0HFK4;Q6L507;A0A0E0FGC0;B9FKL6;Q0DHK3;Q0JQL7;A2ZTK1;A2WQG8;A0A0P0V310;B9G1J0…	Q6F362;A2Y7R3;A0A0E0HIT7;Q9LGI2;Q94JJ7;Q94JJ4;Q7GBK0;B9A1G8;B9A1G6;A2WKS8;A2WKS3;A2WKP5;A2WKP3;A0A0E0FGD0;A0A0E0FG86;A0A0E0FG84;Q94JE1;A2WKT4;A0A0E0FGD7;A0A0E0FGB4;Q943L2;A2WWU2;A0A0E0FVL2;Q6ZBP3;A2YWI3;A0A0E0FGC8;A3AGM4;A2XF66;A0A0E0FLV8;A0A0E0IDM9;Q9LGH8;Q9LGH4;A2WKT1;A2WKS5;A0A0E0FGD2;A0A0P0XHD8;B8AZ01;A0A0P0WN72;A0A0E0HFK4;Q6L507;A0A0E0FGC0;B9FKL6;Q0DHK3	Histone H2B.9;Histone H2B.9;Histone H2B;Histone H2B.10;Histone H2B.3;Histone H2B.4;Histone H2B.7;Histone H2B;Histone H2B;Histone H2B.7;Histone H2B.10;Histone H2B.4;Histone H2B.3;Histone H2B;Histone H2B;Histone H2B;Histone H2B.5;Histone H2B.5;Histone H2B;Hi	H2B.10 Os01g0152300 LOC_Os01g05900 OsJ_000397 P0009G03.29 P0030H07.8;H2B.10 OsI_000416;H2B.11 Os01g0839500 LOC_Os01g62230 OsJ_003922 P0031D11.32 P0408C03.7;H2B.11 OsI_004285;H2B.2 Os08g0490900 LOC_Os08g38300 OsJ_026648 P0605H02.39;H2B.2 OsI_028676;H2B.3 Os01g0149400 LOC_Os01g05610 OsJ_000370 P0434B04.27;H2B.3 OsI_000386;H2B.4 Os01g0149600 LOC_Os01g05630 OsJ_000372 P0434B04.31;H2B.4 OsI_000388;H2B…	1.08334	0.39824	up	9.14403	9.02854	1527000000	1470300000	2316100000	676100000	654230000	1333400000	9.10353	9.08029	9.24826	8.90059	8.93676	9.24826
32	Q5ZD71;A0A0E0FGE1;A0A0E0FGD9;A0A0E0FGE0;B9ESX6;B8ADC4	Q5ZD71;A0A0E0FGE1;A0A0E0FGD9;A0A0E0FGE0;B9ESX6;B8ADC4	Putative aspartyl-tRNA synthetase;Uncharacterized protein;Uncharacterized protein;Uncharacterized protein;Uncharacterized protein;Uncharacterized protein	OsI_00447;OsJ_00416;P0030H07.25	2.04091	0.373901	up	2.02921	1	14576000	0	0	0	0	0	4.08764	1	1	1	1	1
34	A0A0E0FGL1	A0A0E0FGL1	Uncharacterized protein		2.01615	0.373901	up	2.0116	1	0	0	11521000	0	0	0	1	1	4.03481	1	1	1
36	A0A0P0UZH3;Q43007;B8ADH7;A0A0E0FGX0;A0A0E0FGW9;A0A0P0UZ65;A0A0P0UYT9	A0A0P0UZH3;Q43007;B8ADH7;A0A0E0FGX0;A0A0E0FGW9	Os01g0172400 protein (Fragment);Phospholipase D alpha 1;Phospholipase D;Phospholipase D;Phospholipase D	Os01g0172400 OSNPB_010172400;OsI_00588;PLD1 Os01g0172400 LOC_Os01g07760 OsJ_00559	4.22541	0.418445	up	5.14988	3.07079	30559000	12362000	27892000	8548600	0	0	7.18112	4.04141	4.22711	7.21237	1	1
38	Q9AQZ5;A0A0E0FH59;A0A0P0UZP8;A2WLE4;Q5KQJ9;A2Y116;A0A0E0HAE2	Q9AQZ5;A0A0E0FH59;A0A0P0UZP8;A2WLE4	70 kDa heat shock protein;Uncharacterized protein;Os01g0180800 protein (Fragment);Uncharacterized protein	Os01g0180800 Os01g0180800 OJ1174_D05.17 OsJ_00630 OSNPB_010180800 P0666G04.5;Os01g0180800 OSNPB_010180800;Os05g0181000 Os05g0181000 OsJ_17347 OSNPB_050181000 P0453H11.8;OsI_00654;OsI_18700	37.652	0.00672705	up	6.23465	1	38079000	31673000	25790000	0	0	0	7.36993	7.12588	4.20815	1	1	1
40	Q5SNH7;A2WLK9;A0A0E0FHF9	Q5SNH7;A2WLK9;A0A0E0FHF9	Os01g0191100 protein;Uncharacterized protein;Uncharacterized protein	Os01g0191100 Os01g0191100 OsJ_28991 OSNPB_010191100 P0710E05.27;OsI_00724	4.172	0.116145	up	3.06074	1	16653000	13836000	0	0	0	0	4.11739	4.06483	1	1	1	1
41	A2WLL2;A0A0E0FHG7;Q5SNJ4	A2WLL2;A0A0E0FHG7;Q5SNJ4	Uncharacterized protein;Uncharacterized protein;Os01g0191500 protein	Os01g0191500 Os01g0191500 OsJ_00704 OSNPB_010191500 P0710E05.34;OsI_00727	1.08973	0.368644	up	9.09899	8.97502	2441400000	1538500000	991840000	833740000	770500000	743530000	9.29964	9.11747	8.87987	8.97306	9.0021	8.94989
42	Q7F5L2;Q42974;A0A0E0FHM7;B8ADR2	Q7F5L2;Q42974;A0A0E0FHM7;B8ADR2	Os01g0196600 protein;Nucleotide pyrophosphatase;Uncharacterized protein;Uncharacterized protein	Os01g0196600 OsJ_00737 OSNPB_010196600 P0419B01.3;OSE4;OsI_00764	1.92454	0.373901	up	1.94451	1	4883500	0	0	0	0	0	3.83353	1	1	1	1	1
43	A6N1B9;A6N1T4;Q84R32;K9JEP1;A0A0N7KI05;Q10D87;A2XLS8;A0A0E0FHS2;A0A0E0FHS3;B9FBP6;A0A0E0FHS4	A6N1B9;A6N1T4;Q84R32;K9JEP1;A0A0N7KI05;Q10D87;A2XLS8;A0A0E0FHS2;A0A0E0FHS3;B9FBP6;A0A0E0FHS4	Cbs domain protein (Fragment);Cbs domain protein (Fragment);CBS domain containing protein, expressed;CBSX4;Os03g0737000 protein (Fragment);CBS domain containing protein, expressed;Uncharacterized protein;Uncharacterized protein;Uncharacterized protein;Unch	LOC_Os03g52690;Os03g0737000 OSNPB_030737000;OsI_13431;OsJ_12490;OSJNBb0016H12.19 LOC_Os03g52690 Os03g0737000 OSNPB_030737000	138.872	4.33252e-07	up	8.11761	1	151600000	271230000	112640000	0	0	0	8.08688	8.3334	7.93256	1	1	1
44	Q10D68;B8AJX7;A0A0E0FHU0;A0A0E0FHU1;Q7Y1F0;B9FBQ3;A0A0P0W2R2;Q10D67;Q6TUC6;A6MZY8	Q10D68;B8AJX7;A0A0E0FHU0;A0A0E0FHU1;Q7Y1F0;B9FBQ3;A0A0P0W2R2;Q10D67	Serine hydroxymethyltransferase;Serine hydroxymethyltransferase;Serine hydroxymethyltransferase;Serine hydroxymethyltransferase;Serine hydroxymethyltransferase;Serine hydroxymethyltransferase;Serine hydroxymethyltransferase (Fragment);Serine hydroxymethylt	LOC_Os03g52840;Os03g0738400 LOC_Os03g52840 Os03g0738400 OSNPB_030738400;Os03g0738400 OSNPB_030738400;OsI_13440;OsJ_12499;OSJNBa0057G07.17	18.3713	0.0289836	up	5.19938	1	80201000	5953700	9949800	0	0	0	7.71724	3.88275	3.99815	1	1	1
45	A2XAQ8;Q6K848;A0A0E0GE92;Q5VRF5;B8BCZ0;B2M117;A0A0E0FI06	A2XAQ8;Q6K848;A0A0E0GE92;Q5VRF5;B8BCZ0;B2M117;A0A0E0FI06	Ribonucleoside-diphosphate reductase;Ribonucleoside-diphosphate reductase;Ribonucleoside-diphosphate reductase;Ribonucleoside-diphosphate reductase;Ribonucleoside-diphosphate reductase;Ribonucleoside-diphosphate reductase;Ribonucleoside-diphosphate reducta	Os06g0168600 OsJ_20270 OSJNBa0033B09.19 OSNPB_060168600 P0680A03.40;OsI_09340;OsI_30411;RnrL1;RnrL2 Os02g0804900 OJ1548_F12.14 OsJ_08774 OSNPB_020804900	2.00604	0.373901	up	2.00435	1	0	11004000	0	0	0	0	1	4.01305	1	1	1	1
46	B9FRQ2;Q0DE86;A0A0E0FI10;B8B398;A0A0N7KLL5;Q5VRG1	B9FRQ2;Q0DE86;A0A0E0FI10;B8B398;A0A0N7KLL5;Q5VRG1	Uncharacterized protein;Os06g0168000 protein;Uncharacterized protein;Uncharacterized protein;Os06g0168000 protein (Fragment);Uncharacterized protein	Os06g0168000;Os06g0168000 OSNPB_060168000;OsI_21829;OsJ_20265;OSJNBa0033B09.11 P0680A03.32	2.5535	0.605318	up	6.87625	5.52377	28591000	75834000	77809000	49730000	37715000	0	5.18615	7.71063	7.73196	7.84875	7.72257	1
47	B8B388;B9FRP7;B8AYE9;Q75IR5;Q5WAB4;B9FMM1;A0A0E0FI21	B8B388;B9FRP7;B8AYE9;Q75IR5;Q5WAB4;B9FMM1;A0A0E0FI21	Uncharacterized protein;Uncharacterized protein;Uncharacterized protein;Putative PRP8 protein;Putative splicing factor Prp8;Uncharacterized protein;Uncharacterized protein	OsI_18577;OsI_21820;OsJ_17229;OsJ_20259;OSJNBb0099P06.8;P0680A03.20-1	3.60483	0.116194	up	2.84993	1	4325600	4347900	0	0	0	0	3.7361	3.8137	1	1	1	1
48	A2Y1G9;A0A0E0HAZ7;A6MZJ2;A0A0E0FIA8;Q9LWN1;Q0DK10;B8AZ52;A2YDY2;A2WLV8;A0A0E0HS77;A0A0E0FIA7;A0A0P0WXQ4;Q5Z951;B8APW3;A0A0P0Y2I2;Q2R3R6	A2Y1G9;A0A0E0HAZ7;A6MZJ2;A0A0E0FIA8;Q9LWN1;Q0DK10;B8AZ52;A2YDY2;A2WLV8;A0A0E0HS77;A0A0E0FIA7;A0A0P0WXQ4;Q5Z951;B8APW3;A0A0P0Y2I2;Q2R3R6	Uncharacterized protein;Uncharacterized protein;60S ribosomal protein l11 (Fragment);Uncharacterized protein;Os01g0205500 protein;60S ribosomal protein L11;Uncharacterized protein;60S ribosomal protein L11;Uncharacterized protein;Uncharacterized protein;Un	LOC_Os11g31020;Os01g0205500 OsJ_00808 OSNPB_010205500 P0451C06.24;Os06g0550000 OSNPB_060550000;Os11g0506300 OSNPB_110506300;OsI_00826;OsI_11660;OsI_18846 OsI_23322;OsI_18847;P0659D09.25;RPL11 Os05g0207300 LOC_Os05g11710 OJ1430_B02.2 OsJ_17505 OsJ_21642;RPL11 OsI_022525	1.05669	0.0530568	up	8.5202	8.44064	392390000	444820000	377070000	204960000	223210000	225070000	8.49553	8.56953	8.49553	8.41068	8.44728	8.46397
49	B8ACQ6;Q9LDQ4;A0A0E0FID7	B8ACQ6;Q9LDQ4;A0A0E0FID7	Uncharacterized protein;Sterol C-22 desaturase-like;Uncharacterized protein	OsI_00867;OsJ_00852 P0031E09.29 P0466B10.39	1.95763	0.373901	up	1.96911	1	0	6762100	0	0	0	0	1	3.90733	1	1	1	1
50	Q5QNI2;B8AAM8;A0A0E0FIE5	Q5QNI2;B8AAM8;A0A0E0FIE5	Sodium/calcium exchanger NCL1;Uncharacterized protein;Uncharacterized protein	NCL1 Os01g0212400 LOC_Os01g11414 OsJ_00857 P0031E09.40;OsI_00872	93.9746	1.19892e-08	up	7.5542	1	52324000	47681000	64366000	0	0	0	7.55407	7.47836	7.63017	1	1	1
51	Q9LHW4;A2WM28;A0A0E0FIG6;A0A0E0FIG5	Q9LHW4;A2WM28;A0A0E0FIG6;A0A0E0FIG5	Os01g0216000 protein;Uncharacterized protein;Uncharacterized protein;Uncharacterized protein	Os01g0216000 Os01g0216000 OsJ_00877 OSNPB_010216000 P0515G01.29;OsI_00896	1.96187	0.373901	up	1.97223	1	6536800	0	0	0	0	0	3.91669	1	1	1	1	1
53	A0A0P0V0B3;A2ZQV5;Q9AWZ8;A0A0E0FIR4;A2WM98	A0A0P0V0B3;A2ZQV5;Q9AWZ8;A0A0E0FIR4;A2WM98	Os01g0225400 protein (Fragment);3-methyl-2-oxobutanoate hydroxymethyltransferase;3-methyl-2-oxobutanoate hydroxymethyltransferase 1, mitochondrial;3-methyl-2-oxobutanoate hydroxymethyltransferase;3-methyl-2-oxobutanoate hydroxymethyltransferase	KPHMT1 PANB1 Os01g0225400 LOC_Os01g12560 P0443E07.6 P0492F05.15;Os01g0225400 OSNPB_010225400;OsI_00970;OsJ_00950	8.26019	1.15269e-07	up	4.04617	1	11533000	17263000	9770300	0	0	0	4.02947	4.11495	3.99411	1	1	1
55	A0A0P0V0M7;Q5NAY4;A2WMG4;A0A0E0FJ38	A0A0P0V0M7;Q5NAY4;A2WMG4;A0A0E0FJ38	Os01g0232700 protein (Fragment);Histidinol dehydrogenase, chloroplastic;Histidinol dehydrogenase, chloroplastic;Histidinol dehydrogenase, chloroplastic	HDH Os01g0232700 LOC_Os01g13190 OsJ_01002 P0702F03.3;Os01g0232700 OSNPB_010232700;OsI_01033	8.73787	5.80937e-10	up	4.12728	1	18223000	18989000	16404000	0	0	0	4.13995	4.13393	4.10797	1	1	1
57	A0A0E0FJ41;Q0JPA6;A2WMG6;S5CLF6;S5CL75;S5CGQ2	A0A0E0FJ41;Q0JPA6;A2WMG6;S5CLF6;S5CL75;S5CGQ2	Uncharacterized protein;Salt stress root protein RS1;Salt stress root protein RS1;RS1 (Fragment);RS1 (Fragment);RS1 (Fragment)	Os01g0233000 LOC_Os01g13210 OsJ_000980 P0702F03.6;OsI_001009;RS1	1.15635	0.338906	up	8.90352	8.69394	1160100000	936540000	947170000	589240000	611130000	163710000	8.99609	8.86161	8.85286	8.86161	8.90059	8.31963
61	Q5NA80;A0A0E0FJB6;B9EUM2;B8ABF5	Q5NA80;A0A0E0FJB6;B9EUM2;B8ABF5	Os01g0242300 protein;Uncharacterized protein;Uncharacterized protein;Uncharacterized protein	Os01g0242300 Os01g0242300 B1066G12.14 OSNPB_010242300;OsI_01119;OsJ_01067	8.71152	0.155643	up	4.12292	1	0	23599000	30863000	0	0	0	1	4.17542	7.19335	1	1	1
63	Q71VM4;Q0JP03;A2WMY5;A0A0E0FJH7	Q71VM4;Q0JP03;A2WMY5;A0A0E0FJH7	Importin subunit alpha-1a;Importin subunit alpha;Importin subunit alpha;Uncharacterized protein	Os01g0253300 LOC_Os01g14950;Os01g0253300 OsJ_01128;OsI_01208	8.90591	0.154837	up	4.15476	1	27477000	33929000	0	0	0	0	4.22416	7.24013	1	1	1	1
64	A3CIF1;Q9SDK4;Q2QNM5;B8ABU1;A2ZLM3;A0A0E0JB65;A0A0E0FJI4	A3CIF1;Q9SDK4;Q2QNM5;B8ABU1;A2ZLM3;A0A0E0JB65;A0A0E0FJI4	Uncharacterized protein;GTP-binding protein;GTP-binding protein SAR1A, putative, expressed;Uncharacterized protein;Uncharacterized protein;Uncharacterized protein;Uncharacterized protein	GBP Os01g0254000 OsJ_01133 OSNPB_010254000 P0705D01.9;Os12g0560300 LOC_Os12g37360 Os12g0560300 OSNPB_120560300;OsI_01215;OsI_38721;OsJ_36503	8.87841	4.27342e-08	up	4.1503	1	24664000	16431000	19796000	0	0	0	4.20268	4.10277	4.14545	1	1	1
67	Q9SDD6;A2ZRK6;A0A0E0FJU3	Q9SDD6;A2ZRK6;A0A0E0FJU3	Peroxiredoxin-2F, mitochondrial;Uncharacterized protein;Uncharacterized protein	OsJ_01220;PRXIIF Os01g0266600 LOC_Os01g16152 P0011D01.6 P0499C11.34	95.3	1.08797e-08	up	7.5744	1	46818000	67577000	59076000	0	0	0	7.4977	7.64607	7.57944	1	1	1
68	Q9SDD1;Q60EW3;A2Y3X5;A2WN87;A0A0E0HDJ6;A0A0E0FJV1;A0A2H4ULD7	Q9SDD1;Q60EW3;A2Y3X5;A2WN87;A0A0E0HDJ6;A0A0E0FJV1;A0A2H4ULD7	26S proteasome regulatory particle non-ATPase subunit11;Os05g0371200 protein;Uncharacterized protein;Uncharacterized protein;Uncharacterized protein;Uncharacterized protein;26S proteasome non-ATPase regulatory subunit 14 (Fragment)	Os05g0371200 OJ1118_F06.13 OsJ_18298 OSNPB_050371200;OsI_01313;OsI_19702;OsRPN11 Os01g0267200 OsJ_01223 OSNPB_010267200 P0011D01.14	4.09296	0.116126	up	3.03314	1	13311000	11886000	0	0	0	0	4.06463	4.03481	1	1	1	1
71	A2WNB9;Q0JNQ7;A0A0E0FJZ2;Q5NBF5	A2WNB9;Q0JNQ7;A0A0E0FJZ2;Q5NBF5	ATP-dependent Clp protease proteolytic subunit;ATP-dependent Clp protease proteolytic subunit;ATP-dependent Clp protease proteolytic subunit;ATP-dependent Clp protease proteolytic subunit	Os01g0271400 Os01g0271400 OSNPB_010271400;OsI_01344;OsJ_01248 P0693B08.13	2.00658	0.373901	up	2.00474	1	0	0	10523000	0	0	0	1	1	4.01422	1	1	1
72	B8ACN1;Q9SDG8;A0A0E0FK03;A2ZRR6;A0A0E0FK02;A0A0E0FK01	B8ACN1;Q9SDG8;A0A0E0FK03;A2ZRR6;A0A0E0FK02;A0A0E0FK01	Uncharacterized protein;Protein argonaute 4A;Uncharacterized protein;Uncharacterized protein;Uncharacterized protein;Uncharacterized protein	AGO4A Os01g0275600 LOC_Os01g16870 P0038F12.13;OsI_01366;OsJ_01274	4.16891	0.116117	up	3.05967	1	15013000	15525000	0	0	0	0	4.09247	4.08654	1	1	1	1
74	B9EV70;B8ACI8;Q5NBN7;A0A0E0FK11;A0A0P0V1K5	B9EV70;B8ACI8;Q5NBN7;A0A0E0FK11;A0A0P0V1K5	Os01g0276200 protein;Uncharacterized protein;Mitochondrial import receptor subunit tom40-like;Uncharacterized protein;Os01g0276200 protein (Fragment)	Os01g0276200 OsJ_01285;Os01g0276200 OSNPB_010276200;OsI_01377;P0038F12.19	1.24295	0.00108319	up	8.13882	7.82505	168630000	165490000	194800000	50454000	42654000	46838000	8.13035	8.09948	8.18661	7.85539	7.771	7.84875
75	A0A0P0V0X7;A0A0P0V155;Q5NBQ0;B8ACJ0;A0A0E0FK16	A0A0P0V0X7;A0A0P0V155;Q5NBQ0;B8ACJ0;A0A0E0FK16	Pyruvate kinase (Fragment);Pyruvate kinase (Fragment);Pyruvate kinase;Pyruvate kinase;Pyruvate kinase	Os01g0276700 OsJ_01290 OSNPB_010276700 P0038F12.25;Os01g0276700 OSNPB_010276700;OsI_01382	1.86872	0.160602	up	1.90205	1	2165400	2427600	0	0	0	0	1.88926	2.8169	1	1	1	1
76	Q5NBP9;A2WNF5;A0A0E0FK18;A0A0P0V1J5;A0A0P0V1M1;A0A0P0V0Y5	Q5NBP9;A2WNF5;A0A0E0FK18;A0A0P0V1J5;A0A0P0V1M1;A0A0P0V0Y5	Glucosidase 2 subunit beta;Glucosidase 2 subunit beta;Uncharacterized protein;Os01g0276800 protein (Fragment);Os01g0276800 protein (Fragment);Os01g0276800 protein (Fragment)	Os01g0276800 OsJ_01291 P0038F12.26;Os01g0276800 OSNPB_010276800;OsI_01383	7.95563	8.07229e-09	up	3.99198	1	10284000	10875000	8458300	0	0	0	4.01113	4.00904	3.95575	1	1	1
77	Q9SDJ2;A0A0E0FK45;B9EV82;B8ACJ6;A6N1H0;A0A0P0V0Z9	Q9SDJ2;A0A0E0FK45;B9EV82;B8ACJ6	Magnesium-protoporphyrin IX monomethyl ester [oxidative] cyclase;Uncharacterized protein;Uncharacterized protein;Uncharacterized protein	Os01g0279100 OSNPB_010279100;OsI_01397;OsJ_01305;ZIP1 acsF Os01g0279100 OSNPB_010279100 P0003H10.2 P0025D05.31	256.048	4.16374e-12	up	9.00027	1	1194200000	1152000000	1268300000	0	0	0	9.01191	9.0021	8.98681	1	1	1
79	Q0JNL1;Q7F7G0;Q5NAB7;Q2QX42;A2ZIH5;A2WNI1;A0A0E0FK64;A0A0E0J7A1	Q0JNL1;Q7F7G0;Q5NAB7;Q2QX42;A2ZIH5;A2WNI1;A0A0E0FK64;A0A0E0J7A1	Os01g0280400 protein (Fragment);Putative DNA-binding protein;Os01g0280400 protein;DNA-binding protein, putative, expressed;Uncharacterized protein;Uncharacterized protein;Uncharacterized protein;Uncharacterized protein	LOC_Os12g07260 Os12g0170100 OsJ_35368 OSNPB_120170100;Os01g0280400;Os01g0280400 B1085F09.11 OsJ_01319 OSNPB_010280400 P0003H10.22;OsI_01409;OsI_37623;OSJNBa0036E02.13	4.14779	0.116126	up	3.05234	1	0	13760000	15276000	0	0	0	1	4.06376	4.09328	1	1	1
81	B8ACN2;A0A0E0FKA6;Q9AR38;A0A0E0FKA7;B9EVK5	B8ACN2;A0A0E0FKA6;Q9AR38;A0A0E0FKA7;B9EVK5	Protoporphyrinogen oxidase;Protoporphyrinogen oxidase;Protoporphyrinogen oxidase, chloroplastic;Protoporphyrinogen oxidase;Protoporphyrinogen oxidase	OsI_01450;OsJ_01351;PPOX1 Os01g0286600 LOC_Os01g18320 P0498A12.42	1.0818	0.132518	up	8.31451	8.20108	355750000	225330000	235800000	120740000	128220000	123650000	8.4306	8.24185	8.2711	8.18111	8.22668	8.19547
82	A0A0P0V1D7;Q9LGZ3;B8A6R5;A0A0E0FKD2;A0A0E0FKD1;A0A0E0FKD0;A0A0E0FKC9	A0A0P0V1D7;Q9LGZ3;B8A6R5;A0A0E0FKD2;A0A0E0FKD1;A0A0E0FKD0;A0A0E0FKC9	Os01g0290000 protein (Fragment);Os01g0290000 protein;Uncharacterized protein;Uncharacterized protein;Uncharacterized protein;Uncharacterized protein;Uncharacterized protein	Os01g0290000 Os01g0290000 OsJ_01384 OSNPB_010290000 P0469E05.27;Os01g0290000 OSNPB_010290000;OsI_01478	4.13415	0.116129	up	3.04759	1	14666000	13276000	0	0	0	0	4.08851	4.05426	1	1	1	1
84	A2ZS73;A2WNV9;A0A0E0FKM9;Q5JL32;A0A0P0V1K7	A2ZS73;A2WNV9;A0A0E0FKM9	Uncharacterized protein;Uncharacterized protein;Uncharacterized protein	Os01g0300600 OSNPB_010300600;Os01g0300600 P0487H02.36 P0682B08.14;OsI_01543;OsJ_01438	1.74107	0.000852028	up	8.35383	7.55386	383780000	296080000	208230000	21784000	21171000	27167000	8.47832	8.37418	8.20901	7.51283	7.51022	7.63854
86	Q655P5;A0A0P0V1X3;B8A748;B9EVS6;A0A0E0FKX1	Q655P5;A0A0P0V1X3;B8A748;B9EVS6;A0A0E0FKX1	Pectinesterase;Pectinesterase (Fragment);Pectinesterase;Pectinesterase;Pectinesterase	Os01g0312500 B1011A07.22;Os01g0312500 OSNPB_010312500;OsI_01594;OsJ_01485	4.04693	0.1162	up	3.01683	1	0	14166000	9376000	0	0	0	1	4.06901	3.98148	1	1	1
87	Q655Q2;B8A750;A0A0E0FKX9	Q655Q2;B8A750;A0A0E0FKX9	Dihydrolipoamide acetyltransferase component of pyruvate dehydrogenase complex;Dihydrolipoamide acetyltransferase component of pyruvate dehydrogenase complex;Dihydrolipoamide acetyltransferase component of pyruvate dehydrogenase complex	Os01g0314100 B1011A07.49 OsJ_01492 OSNPB_010314100;OsI_01602	5.47036	0.122596	up	3.45164	1	25062000	0	28542000	0	0	0	4.20662	1	5.14828	1	1	1
88	A2WP46;A0A0E0FL00;Q94D81;A0A0E0FL01;Q0JN82;Q655D4;B8A724	A2WP46;A0A0E0FL00;Q94D81;A0A0E0FL01	Uncharacterized protein;Uncharacterized protein;Os01g0317800 protein;Uncharacterized protein	Os01g0317500 Os01g0317500 OSNPB_010317500;Os01g0317800 B1153F04.4 OsJ_01509 OSNPB_010317800 P0028G04.28;OsI_01616;OsI_01618;P0028G04.19	91.2947	2.67443e-08	up	7.51246	1	60396000	48706000	43524000	0	0	0	7.61358	7.49065	7.43314	1	1	1
90	Q7F9U3;A2XQV4;A0A0E0FL67	Q7F9U3;A2XQV4;A0A0E0FL67	Electron transfer flavoprotein subunit beta, mitochondrial;Electron transfer flavoprotein subunit beta, mitochondrial;Uncharacterized protein	ETFB Os04g0182800 LOC_Os04g10400 OsJ_013398 OSJNBb0006L01.5;ETFB OsI_014447	3.90022	0.116125	up	2.96356	1	0	7488600	8580600	0	0	0	1	3.93165	3.95902	1	1	1
91	A2ZSP3;Q94CN9;A2WPH0;A0A0E0FL85	A2ZSP3;Q94CN9;A2WPH0;A0A0E0FL85	Uncharacterized protein;Dihydrolipoyl dehydrogenase;Dihydrolipoyl dehydrogenase;Dihydrolipoyl dehydrogenase	Os01g0337900 Os01g0337900 OSNPB_010337900 P0487E11.36;OsI_01744;OsJ_01605	17.0869	0.143807	up	7.3514	3.25658	41538000	36585000	35765000	0	42648000	0	7.41744	7.30971	7.32704	1	7.76973	1
92	Q93W16;A2WPH1;A0A0E0FL88;A0A0E0FL87	Q93W16;A2WPH1;A0A0E0FL88;A0A0E0FL87	Os01g0338000 protein;Uncharacterized protein;Uncharacterized protein;Uncharacterized protein	Os01g0338000 Os01g0338000 B1088D01.1 OsJ_01606 OSNPB_010338000 P0487E11.37;OsI_01745	106.23	2.77719e-09	up	7.73104	1	89269000	79512000	69831000	0	0	0	7.78364	7.73389	7.67559	1	1	1
94	A0A0E0FLB5	A0A0E0FLB5	Uncharacterized protein		8.38268	1.15362e-10	up	4.06741	1	13090000	13742000	14295000	0	0	0	4.05981	4.06224	4.08018	1	1	1
98	Q8S213;A0A0E0FLE0;B8A7Y9;B9EWC8	Q8S213;A0A0E0FLE0;B8A7Y9;B9EWC8	Exocyst complex component;Exocyst complex component;Poly [ADP-ribose] polymerase;Uncharacterized protein	Os01g0351300 B1051E10.57 OSNPB_010351300 P0463A02.27;OsI_01833;OsJ_01695	8.97354	2.76028e-09	up	4.16568	1	18671000	21324000	24343000	0	0	0	4.14583	4.1569	4.1943	1	1	1
99	A0A0E0FLF3;A0A0E0FLF2	A0A0E0FLF3;A0A0E0FLF2	Uncharacterized protein;Uncharacterized protein		4.05826	0.116134	up	3.02086	1	0	12988000	10336000	0	0	0	1	4.05145	4.01113	1	1	1
100	Q5ZBW3;B8A7X3;A0A0E0FLJ4;A6N009	Q5ZBW3;B8A7X3;A0A0E0FLJ4;A6N009	Os01g0358300 protein;Uncharacterized protein;Uncharacterized protein;Tpr domain containing protein (Fragment)	Os01g0358300 OsJ_01736 OSNPB_010358300 P0514H03.13;OsI_01883	90.6663	2.0657e-11	up	7.50249	1	46628000	51966000	49585000	0	0	0	7.49576	7.52005	7.49167	1	1	1
101	Q5ZBX1;Q0E4Q0;P49398;A2WZV1;A2WPV4;A0A0E0FZX5;A0A0E0FZW8;A0A0E0FLJ5	Q5ZBX1;Q0E4Q0;P49398;A2WZV1;A2WPV4;A0A0E0FZX5;A0A0E0FZW8;A0A0E0FLJ5	40S ribosomal protein S4;40S ribosomal protein S4;40S ribosomal protein S4;40S ribosomal protein S4;40S ribosomal protein S4;40S ribosomal protein S4;40S ribosomal protein S4;40S ribosomal protein S4	Os01g0358400 OsJ_01737 OSNPB_010358400 P0514H03.14;OsI_01884;OsI_05494;RPS4 Os02g0105900 OsJ_05027;RPS4 SS620 Os02g0105900 LOC_Os02g01560 OJ1359_D06.12	174.698	4.06874e-12	up	8.44872	1	375940000	334470000	343910000	0	0	0	8.4589	8.43593	8.45132	1	1	1
104	A0A0E0FLT6;Q9AVE6;B8A8L7;A0A0E0FLT7	A0A0E0FLT6;Q9AVE6;B8A8L7;A0A0E0FLT7	Uncharacterized protein;Sec-independent protein translocase protein TATC, chloroplastic;Uncharacterized protein;Uncharacterized protein	OsI_02087;TATC Os01g0501700 LOC_Os01g31680 B1080D07.26 OsJ_01920	1.07496	0.0434271	up	8.09181	7.98754	166600000	162110000	154150000	64147000	70332000	81699000	8.12642	8.09252	8.0565	7.94805	7.96927	8.04529
106	Q94E96;A2WQG7;A0A0E0FLV6;Q6L500;A2Y5G8;A0A0E0HFL8;A0A0P0WUM7;A0A0E0HNI3;Q8LLP5;Q84MP7;A2XLI0;Q8H7Y8;Q2QPG9;A2ZL69;A2XCU2;A0A0E0JB51;A0A0E0I206;A0A0E0GH56;Q653P3;B9FM49;B8AXA2;C7J5E8;Q75L11;A2XZN0;A3CGY8;A0A0E0I7X8;A0A0E0I3C3;A0A0E0H8L8;A0A0P0V312;A0A0E0GTI4;A0A0E0GGP6;A0A0P0VT87	Q94E96;A2WQG7;A0A0E0FLV6;Q6L500;A2Y5G8;A0A0E0HFL8	Probable histone H2A.5;Probable histone H2A.5;Histone H2A;Probable histone H2A.4;Probable histone H2A.4;Histone H2A	Os03g0279200 LOC_Os03g17100 OsJ_009947;OsI_010711;Os01g0502700 LOC_Os01g31800 OsJ_001872 P0507H06.22;Os01g0502700 OSNPB_010502700;Os03g0144700 OSNPB_030144700;Os03g0162200 LOC_Os03g06670 OJ1607A12.10 OsJ_09510;Os03g0721900 LOC_Os03g51200 B1377B10.25 OsJ_011892 OSJNBa0031O09.03;Os03g0743400 LOC_Os03g53190 OJ1365_D05.1 OsJ_12526 OSJNBb0036F07.3;Os05g0113900 LOC_Os05g02300 OsJ_016124 OSJNBb0041A22.1…	1.04109	0.473513	up	9.03558	8.97749	1095300000	1489200000	1428100000	587750000	781450000	946290000	8.97756	9.10003	9.02917	8.85286	9.01191	9.0677
110	A0A0E0FLW7;Q8W3J0;A0A0B4U157;B8AL25;Q10N94;Q6EPQ1;B8AGT3;A0A0E0GBD0;A0A0E0GBC9;A0A0P0VWN1;Q10N92;B8AL26;A0A0B4U1W1	A0A0E0FLW7;Q8W3J0;A0A0B4U157;B8AL25	Uncharacterized protein;Os03g0278000 protein;NAD-dependent epimerase/dehydratase family domain containing protein (Fragment);Uncharacterized protein	LOC_Os03g16980;LOC_Os03g16980.1;LOC_Os03g17000.2;Os02g0678400 OsJ_07924 OSJNBb0005A04.29 OSNPB_020678400 P0663F07.5;Os03g0278200 LOC_Os03g17000 Os03g0278200 OsJ_10344 OSNPB_030278200;Os03g0278200 OSNPB_030278200;OsI_08465;OsI_10996;OsI_10998;UXS-3 LOC_Os03g16980 Os03g0278000 OsJ_10342 OSNPB_030278000	33.013	0.0862485	up	8.26624	3.22128	344180000	121680000	345360000	0	32332000	0	8.41888	7.92545	8.4544	1	7.66384	1
111	Q53PZ2;Q2QXN5;A2ZI36;A0A0E0J6R4;Q53Q51;A2ZBI3;A0A0E0FLZ9;Q9AWS9;A2WKH0;A0A0E0FG16;Q5ZDH6;A2ZP31;Q0IUK5	Q53PZ2;Q2QXN5;A2ZI36;A0A0E0J6R4;Q53Q51;A2ZBI3;A0A0E0FLZ9;Q9AWS9;A2WKH0;A0A0E0FG16	60S ribosomal protein L26-1, putative, expressed;60S ribosomal protein L26-1, putative, expressed;Uncharacterized protein;Uncharacterized protein;Os11g0151300 protein;Uncharacterized protein;Uncharacterized protein;Putative ribosomal protein L26;Uncharacte	LOC_Os11g05370;Os11g0151300;Os11g0151300 LOC_Os11g05370 OsJ_32984 OSNPB_110151300;Os12g0150100 LOC_Os12g05430 Os12g0150100 OsJ_35234 OSNPB_120150100;OsI_00322 OsI_00325;OsI_35131;OsI_37478;OsJ_00311;P0480E02.19-1 Os01g0140500 OSNPB_010140500;P0480E02.19-2	167.228	1.90693e-09	up	8.38567	1	301260000	344470000	282500000	0	0	0	8.36329	8.44728	8.34644	1	1	1
112	Q5QMT0;A2WQJ8;A0A0E0FM28	Q5QMT0;A2WQJ8;A0A0E0FM28	Beta-glucosidase 1;Uncharacterized protein;Uncharacterized protein	BGLU1 Os01g0508000 LOC_Os01g32364 OSJNBa0094H06.33;OsI_02124	3.71919	0.11624	up	2.89499	1	4517600	0	6043600	0	0	0	3.7925	1	3.89247	1	1	1
114	Q5QMU6;A2WQL5;A0A0E0FM51	Q5QMU6;A2WQL5;A0A0E0FM51	Os01g0511200 protein;Uncharacterized protein;Uncharacterized protein	Os01g0511200 Os01g0511200 OsJ_01973 OSJNBa0054L14.6 OSNPB_010511200 P0520B06.32;OsI_02151	19.4923	0.0158571	up	5.28483	1	26179000	29183000	42158000	0	0	0	4.21354	4.22467	7.41628	1	1	1
115	Q5QMV0;A0A0E0FM66;B9EX64;B8A8X6	Q5QMV0;A0A0E0FM66;B9EX64;B8A8X6	Os01g0512100 protein;Uncharacterized protein;Uncharacterized protein;Uncharacterized protein	Os01g0512100 Os01g0512100 OSJNBa0054L14.19 OSNPB_010512100 P0504D03.5;OsI_02155;OsJ_01978	3.61396	0.116536	up	2.85358	1	4273400	5584400	0	0	0	0	3.69003	3.87072	1	1	1	1
116	B9EX70;B8A8Y2;A0A0E0FM78;Q9AWN0	B9EX70;B8A8Y2;A0A0E0FM78;Q9AWN0	Uncharacterized protein;Uncharacterized protein;Uncharacterized protein;Os01g0513700 protein	OsI_02164;OsJ_01989;P0504D03.30-2 Os01g0513700 OSNPB_010513700	1.03757	0.986736	up	5.28085	5.22764	0	45910000	40034000	0	13819000	11845000	1	7.45404	7.38852	1	7.36194	7.32099
117	A0A0E0FMK7;A2ZTZ0;Q8LQT7;A2WQY0;Q0JM79	A0A0E0FMK7;A2ZTZ0;Q8LQT7;A2WQY0;Q0JM79	3-ketoacyl-CoA synthase;Uncharacterized protein;3-ketoacyl-CoA synthase;3-ketoacyl-CoA synthase;Os01g0529800 protein (Fragment)	Os01g0529800;OsI_02262;OsJ_02069;P0702H08.4 Os01g0529800 OSNPB_010529800	21.5061	0.116135	up	5.42667	1	0	73102000	60962000	0	0	0	1	7.68489	7.59513	1	1	1
119	A0A0E0FMM9;B9EXB9;B8A9N1;A0A0E0FMM8	A0A0E0FMM9;B9EXB9;B8A9N1;A0A0E0FMM8	Uncharacterized protein;Uncharacterized protein;Uncharacterized protein;Uncharacterized protein	OsI_02277;OsJ_02081	2.01232	0.373901	up	2.00886	1	11318000	0	0	0	0	0	4.02657	1	1	1	1	1
121	B7EC00;A0A0E0FMZ7;A0A0P0V3W4;A0A0E0FMZ8;Q5JKF2;A2WR82;A0A0E0FMZ6	B7EC00;A0A0E0FMZ7;A0A0P0V3W4;A0A0E0FMZ8;Q5JKF2;A2WR82;A0A0E0FMZ6	cDNA clone:J013059F16, full insert sequence;Uncharacterized protein;Os01g0549400 protein (Fragment);Uncharacterized protein;DEAD-box ATP-dependent RNA helicase 40;Uncharacterized protein;Uncharacterized protein	Os01g0549400 LOC_Os01g36860 B1156H12.12-1 B1156H12.12-2 OsJ_02174;Os01g0549400 OSNPB_010549400;OsI_02369	2.02978	0.373901	up	2.02132	1	13303000	0	0	0	0	0	4.06397	1	1	1	1	1
125	P40392;A2WRD4;A0A0E0FN63;A6MZU7;A6N1N5	P40392;A2WRD4;A0A0E0FN63	Ras-related protein RIC1;Uncharacterized protein;Uncharacterized protein	OsI_02420;RIC1 Os01g0558600 LOC_Os01g37800 B1064G04.9 B1144D11.31 OsJ_02222	4.22448	0.408511	up	7.58495	5.50618	53664000	55690000	65094000	33183000	50586000	0	7.56092	7.55889	7.63505	7.68783	7.83069	1
126	Q5JKR1;B8AAC6;B9EXJ5;A0A0E0FN67;A0A0P0V430	Q5JKR1;B8AAC6;B9EXJ5;A0A0E0FN67;A0A0P0V430	Chloroplast processing enzyme-like protein;Uncharacterized protein;Uncharacterized protein;Uncharacterized protein;Os01g0558850 protein	B1064G04.13 B1144D11.35;Os01g0558850 OSNPB_010558850;OsI_02423;OsJ_02226	1.99146	0.373901	up	1.99383	1	0	9373400	0	0	0	0	1	3.98148	1	1	1	1
128	B9EXM2;A0A0E0FNB1;B8AAD1;A0A0P0V4H1	B9EXM2;A0A0E0FNB1;B8AAD1	Carbamoyl-phosphate synthase large chain, chloroplastic;Uncharacterized protein;Uncharacterized protein	CARB Os01g0570700 LOC_Os01g38970 OsJ_02282;Os01g0570700 OSNPB_010570700;OsI_02498	17.4344	0.158627	up	7.50644	3.38258	40249000	51776000	61676000	0	0	111550000	7.39889	7.51563	7.60481	1	1	8.14773
129	Q8LQJ8;A0A0E0FNE0;B8AAS6;Q8LQJ9;A2WRN7;A0A0E0FNE1;A0A0P0V4G1	Q8LQJ8;A0A0E0FNE0;B8AAS6;Q8LQJ9;A2WRN7;A0A0E0FNE1;A0A0P0V4G1	ATP-dependent zinc metalloprotease FTSH 5, mitochondrial;Uncharacterized protein;Uncharacterized protein;ATP-dependent zinc metalloprotease FTSH 4, mitochondrial;Uncharacterized protein;Uncharacterized protein;Os01g0574500 protein (Fragment)	FTSH4 Os01g0574400 LOC_Os01g39250 B1151A10.24-2 OsJ_002240;FTSH5 Os01g0574500 LOC_Os01g39260 B1151A10.26-1 OsJ_002241;Os01g0574500 OSNPB_010574500;OsI_02522;OsI_02523	31.8443	0.0695975	up	8.02088	3.02792	161270000	138200000	112600000	0	8505300	0	8.11688	8.01411	7.93164	1	7.08375	1
130	A0A0P0V4F8;A0A0E0FNF1;A0A0E0FNF0;Q0JLS6;B9EXN4;B8AAS8	A0A0P0V4F8;A0A0E0FNF1;A0A0E0FNF0;Q0JLS6;B9EXN4;B8AAS8	Os01g0575000 protein (Fragment);Protein ROOT HAIR DEFECTIVE 3 homolog;Protein ROOT HAIR DEFECTIVE 3 homolog;Protein ROOT HAIR DEFECTIVE 3;Protein ROOT HAIR DEFECTIVE 3 homolog;Protein ROOT HAIR DEFECTIVE 3 homolog	Os01g0575000 OSNPB_010575000;OsI_02526;OsJ_02311;RHD3 Os01g0575000 LOC_Os01g39310 B1112D09.4	41.0209	0.00786358	up	6.35829	1	37159000	52593000	23497000	0	0	0	7.35804	7.52931	4.18752	1	1	1
132	Q0JLN9;A2WRV9;A0A0E0FNN6	Q0JLN9;A2WRV9;A0A0E0FNN6	Os01g0585300 protein;Uncharacterized protein;Uncharacterized protein	Os01g0585300 Os01g0585300 OsJ_02380 OSNPB_010585300;OsI_02598	3.06656	0.144734	up	2.61662	1	14369000	1420200	0	0	0	0	4.08528	2.76459	1	1	1	1
134	Q7F4F8;A2WRY9;A0A0E0FNR3	Q7F4F8;A2WRY9;A0A0E0FNR3	Mitochondrial outer membrane protein porin 3;Uncharacterized protein;Uncharacterized protein	OsI_02626;VDAC3 Os01g0588200 LOC_Os01g40570 OsJ_02405 P0700A11.20	1.09526	0.132897	up	8.25802	8.12675	171780000	227020000	303780000	100800000	109170000	102680000	8.14516	8.24607	8.38284	8.10909	8.14669	8.12448
135	A0A0P0V4P0;A0A0E0FNT4;Q0JLL8;Q5ZC72	A0A0P0V4P0;A0A0E0FNT4;Q0JLL8;Q5ZC72	Os01g0589800 protein (Fragment);Uncharacterized protein;Os01g0589800 protein (Fragment);Light stress-responsive one-helix protein-like	Os01g0589800;Os01g0589800 OSNPB_010589800;P0415C01.15	3.01836	0.136268	up	2.59376	1	6946400	3073500	0	0	0	0	3.93433	2.84697	1	1	1	1
136	Q2QP54;A2ZLC1;A0A0E0FNU4;A0A0P0YBF5;A0A0P0YAX3;A0A0P0YB77	Q2QP54;A2ZLC1;A0A0E0FNU4;A0A0P0YBF5;A0A0P0YAX3;A0A0P0YB77	Elongation factor Ts, mitochondrial;Elongation factor Ts, mitochondrial;Elongation factor Ts, mitochondrial;Elongation factor Ts (Fragment);Os12g0541500 protein (Fragment);Os12g0541500 protein	EFTS;EFTS OsI_38621;Os12g0541500 EFTS LOC_Os12g35630 Os12g0541500 OsJ_36392 OSNPB_120541500;Os12g0541500 OSNPB_120541500	1.9181	0.373901	up	1.93968	1	0	0	3805400	0	0	0	1	1	3.81904	1	1	1
137	B9EXU1;A2WS12;Q9LRE9;A0A0E0FNY8	B9EXU1;A2WS12;Q9LRE9;A0A0E0FNY8	Uncharacterized protein;Uncharacterized protein;Cytosolic aldehyde dehydrogenase;Uncharacterized protein	ALDH1a Os01g0591000 OSNPB_010591000 P0710A02.6;OsI_02650;OsJ_02428	41.9689	0.00849111	up	6.39125	1	59213000	21571000	41908000	0	0	0	7.60339	4.15937	7.41099	1	1	1
138	B9FJT7;A0A0E0FP05;Q5W6B7;A2Y2K9;A0A0E0IIV6;Q0JLK3;A2WS29	B9FJT7;A0A0E0FP05;Q5W6B7;A2Y2K9;A0A0E0IIV6;Q0JLK3;A2WS29	Uncharacterized protein;Uncharacterized protein;Os05g0270000 protein;Uncharacterized protein;Uncharacterized protein;Os01g0593500 protein;Uncharacterized protein	Os01g0593500 Os01g0593500 OsJ_02444 OSNPB_010593500;Os05g0270000 OSJNBa0037H03.14 OSNPB_050270000;OsI_02667;OsI_19240;OsJ_17852	2.04788	0.373901	up	2.03413	1	0	16391000	0	0	0	0	1	4.10238	1	1	1	1
140	P12331;I3QD41;A2WS81;A0A0E0FP73;B9EXX3;A0A0P0V4X0	P12331;I3QD41;A2WS81;A0A0E0FP73	Chlorophyll a-b binding protein 2, chloroplastic;Chlorophyll a-b binding protein, chloroplastic;Chlorophyll a-b binding protein, chloroplastic;Chlorophyll a-b binding protein, chloroplastic	CAB2R Os01g0600900 LOC_Os01g41710 OsJ_28992 P0518F01.17-1;Os01g0600900 OSNPB_010600900;OsI_02717;OsJ_02493	1.19099	0.251471	up	9.57164	9.31948	6978700000	6363100000	2074700000	1601600000	1685700000	1842200000	9.75563	9.75563	9.20367	9.2625	9.29964	9.39631
143	A2WSL8;Q9FTG9;A0A0E0FPJ8	A2WSL8;Q9FTG9;A0A0E0FPJ8	Uncharacterized protein;Os01g0615300 protein;Uncharacterized protein	Os01g0615300 OsJ_02606 OSNPB_010615300 P0410E01.47;OsI_02861	7.83708	9.1642e-09	up	3.97032	1	9317300	7569300	9412100	0	0	0	3.99411	3.93372	3.98312	1	1	1
146	B8ABW9;Q5ZBH5;A0A0E0FPM3;A0A0E0FPM2;Q0JL73;B8ABX0;A0A0E0FPM4	B8ABW9;Q5ZBH5;A0A0E0FPM3;A0A0E0FPM2;Q0JL73;B8ABX0;A0A0E0FPM4	Uncharacterized protein;DEAD-box ATP-dependent RNA helicase 25;Uncharacterized protein;Uncharacterized protein;DEAD-box ATP-dependent RNA helicase 26;Uncharacterized protein;Uncharacterized protein	Os01g0618400 LOC_Os01g43120 B1040D09.6 OsJ_02628;Os01g0618500 LOC_Os01g43130 B1040D09.7 OsJ_02629;OsI_02884;OsI_02885	23.8732	0.00756994	up	5.57732	1	28533000	37024000	26997000	0	0	0	5.18529	7.32704	4.21962	1	1	1
147	B9EY36;A2ZVG7;A0A0E0FPM6;B8ABX2;A0A0P0V5A1;A0A0N7KDC0	B9EY36;A2ZVG7;A0A0E0FPM6;B8ABX2;A0A0P0V5A1;A0A0N7KDC0	Uncharacterized protein;ATP-dependent zinc metalloprotease FTSH 9, chloroplastic/mitochondrial;Uncharacterized protein;Uncharacterized protein;Os01g0618800 protein (Fragment);Os01g0618800 protein (Fragment)	FTSH9 Os01g0618800 LOC_Os01g43150 B1040D09.10-1 B1040D09.11 OsJ_002539;Os01g0618800 OSNPB_010618800;OsI_02887;OsJ_02631	7.39778	6.3101e-09	up	3.88709	1	5309300	5780800	6919400	0	0	0	3.86491	3.87716	3.91921	1	1	1
148	A0A0E0FPP3;A2WSS4;Q0JL46;A0A0E0FPP4;A0A0P0V5F0;A0A0P0V5E1	A0A0E0FPP3;A2WSS4;Q0JL46;A0A0E0FPP4;A0A0P0V5F0	Uncharacterized protein;Uncharacterized protein;Neutral ceramidase;Uncharacterized protein;Os01g0624000 protein (Fragment)	Os01g0624000 LOC_Os01g43520 OsJ_02661 P0501G01.30-1;Os01g0624000 OSNPB_010624000;OsI_02918	4.06216	0.11625	up	3.02225	1	14680000	9303700	0	0	0	0	4.08899	3.97775	1	1	1	1
149	A0A0P0V5J2;A6N0C5;Q0JL44;B8ABY6;A0A0E0FPP8	A0A0P0V5J2;A6N0C5;Q0JL44;B8ABY6;A0A0E0FPP8	Os01g0624500 protein (Fragment);Suppressor of g2 allele of skp1 (Fragment);Protein SGT1 homolog;Uncharacterized protein;Uncharacterized protein	Os01g0624500 OSNPB_010624500;OsI_02921;SGT1 Os01g0624500 LOC_Os01g43540 OsJ_02663	18.2456	0.0133365	up	5.18948	1	30358000	25522000	25511000	0	0	0	7.16884	4.19339	4.20621	1	1	1
151	Q9FDZ1;B8AC00;A0A0E0FPR8	Q9FDZ1;B8AC00;A0A0E0FPR8	Cytochrome P450;Uncharacterized protein;Uncharacterized protein	CYP72A18 Rice2 Os01g0627500 OsJ_02679 OSNPB_010627500 P0006C01.34 P0688A04.12;OsI_02934	2.01338	0.373901	up	2.00962	1	0	0	11262000	0	0	0	1	1	4.02885	1	1	1
154	Q2QSR7;A0A0E0FQ23;B8BPB7;A0A0P0Y9F9	Q2QSR7;A0A0E0FQ23;B8BPB7;A0A0P0Y9F9	Os12g0420200 protein;Uncharacterized protein;Uncharacterized protein;Os12g0420200 protein (Fragment)	LOC_Os12g23180 Os12g0420200 OsJ_35887 OSNPB_120420200;Os12g0420200 OSNPB_120420200;OsI_38123	1.35462	0.10174	up	8.17704	7.73915	337320000	88245000	281540000	38714000	30631000	44239000	8.40823	7.77874	8.34416	7.75321	7.64125	7.82298
155	A2ZJY0;H2KWR6;A0A0E0FQ26;Q2QSR5;A2ZJX7	A2ZJY0;H2KWR6;A0A0E0FQ26;Q2QSR5;A2ZJX7	Uncharacterized protein;Photosystem I reaction center subunit XI, chloroplast, putative, expressed;Uncharacterized protein;Os12g0420400 protein;Uncharacterized protein	LOC_Os12g23200;Os12g0420400 LOC_Os12g23200 Os12g0420400 OSNPB_120420400;OsI_38125;OsI_38129	213.02	1.80382e-12	up	8.73484	1	702460000	671910000	664310000	0	0	0	8.74341	8.72397	8.73715	1	1	1
157	A2ZVZ6;Q5VQU1;Q0IJY1;A2WT73;A0A0E0FQ83;Q2TJ67;Q0E2W7	A2ZVZ6;Q5VQU1;Q0IJY1;A2WT73;A0A0E0FQ83;Q2TJ67	ADP,ATP carrier protein;ADP,ATP carrier protein;ADP,ATP carrier protein;ADP,ATP carrier protein;ADP,ATP carrier protein;ADP,ATP carrier protein	Os01g0647100 OSNPB_010647100 P0038D11.19 P0707D10.46;Os02g0208100;OsI_03061;OsJ_02814	2.05542	0.373901	up	2.03943	1	16721000	0	0	0	0	0	4.1183	1	1	1	1	1
158	B8A797;Q8W0I1;A0A0E0FQ96	B8A797;Q8W0I1;A0A0E0FQ96	Uncharacterized protein;Os01g0673600 protein;Uncharacterized protein	Os01g0673600 OsJ_02975 OSNPB_010673600 P0007F06.32 P0485G01.22;OsI_03230	1.98049	0.657299	up	4.04623	3.06037	10067000	14942000	12352000	7397500	0	0	4.00825	4.07955	4.0509	7.18112	1	1
159	Q94JA2;Q7FSL4;A2WT84;A0A0E0FQB0	Q94JA2;Q7FSL4;A2WT84;A0A0E0FQB0	Malate dehydrogenase;Malate dehydrogenase;Malate dehydrogenase;Malate dehydrogenase	MDH;OsI_03070;P0047B08.9 Os01g0649100 OJ1316_H05.27 OsJ_02822 OSNPB_010649100	154.581	6.10044e-11	up	8.27222	1	242360000	230290000	246360000	0	0	0	8.27355	8.24909	8.29402	1	1	1
161	Q9XGU8;Q7F280;A2WTC5;A0A0E0FQE3;A0A0E0J3B3;A0A0E0HIS5;A0A0E0J3B4;A0A0E0J3B1;Q9XGU7;Q65XK3;Q9XHX4;A0A0E0J3B2;A0A0E0HIS4;A2Y7Q3;B9EUP0;B8ABR1	Q9XGU8;Q7F280;A2WTC5;A0A0E0FQE3	Isocitrate dehydrogenase [NADP];Isocitrate dehydrogenase [NADP];Isocitrate dehydrogenase [NADP];Isocitrate dehydrogenase [NADP]	Os01g0654500 Os01g0654500 OsJ_02861 OSJNBa0049H05.1 OSJNBb0006H05.32 OSNPB_010654500;Os05g0573200 Os05g0573200 OJ1735_C10.15 OsJ_19624 OSNPB_050573200;OsI_01162;OsI_03110;OsI_21072;OsJ_01099;OSJNBa0049B20.19 Os01g0248400 OSNPB_010248400 P0034C11.22	86.3064	8.3606e-08	up	7.43139	1	35191000	41691000	57641000	0	0	0	7.3251	7.40592	7.56316	1	1	1
162	B9EYE7;B8A6V4;A0A0E0FQF6;Q5SN76;Q0JKR1	B9EYE7;B8A6V4;A0A0E0FQF6;Q5SN76;Q0JKR1	Uncharacterized protein;Uncharacterized protein;Uncharacterized protein;Putative acyl-CoA synthetase;Os01g0655800 protein (Fragment)	Os01g0655800 Os01g0655800 OSNPB_010655800;OsI_03121;OsJ_02872;OSJNBa0049H05.27	29.1589	0.0850048	up	7.99693	3.13107	175820000	74722000	177930000	0	15029000	0	8.15492	7.69724	8.13864	1	7.3932	1
163	A6N1K4;Q8SA35;A2WTF3;A0A0E0FQH8;A6N1V1;B9EU54;A0A0E0FIM5;Q5NB63;B8AAM5	A6N1K4;Q8SA35;A2WTF3;A0A0E0FQH8	Vacuolar proton-translocating atpase subunit e (Fragment);Os01g0659200 protein;Uncharacterized protein;Uncharacterized protein	Os01g0222500 Os01g0222500 OSNPB_010222500 P0443E05.13;Os01g0659200 Os01g0659200 OsJ_02889 OSNPB_010659200 P0684E06.9;OsI_00945;OsI_03137;OsJ_00923	193.696	9.89849e-12	up	8.59765	1	493080000	492700000	482930000	0	0	0	8.59162	8.61463	8.58669	1	1	1
165	C7IWI9;Q9ZWF5;A0A0E0HIL8;O22386;A0A0S2IL65;A0A0E0FQJ9	C7IWI9;Q9ZWF5;A0A0E0HIL8;O22386;A0A0S2IL65;A0A0E0FQJ9	Os01g0662200 protein (Fragment);Os05g0568300 protein;Uncharacterized protein;50S ribosomal protein L12, chloroplastic;Al1;Uncharacterized protein	Os01g0662200;rpl12-1 Os05g0568300 OJ1781_H11.20 OSJNBa0040E06.2 OSNPB_050568300;RPL12-2 Os01g0662300 LOC_Os01g47330 P0671D01.26	8.8134	1.77309e-08	up	4.1397	1	21190000	15847000	20591000	0	0	0	4.17174	4.09473	4.15262	1	1	1
166	A2WTG9;A0A0E0FQK1;Q8LR33	A2WTG9;A0A0E0FQK1;Q8LR33	Uncharacterized protein;Uncharacterized protein;Os01g0662700 protein	Os01g0662700 OsJ_02907 OSNPB_010662700 P0671D01.29;OsI_03152	82.9827	3.15239e-08	up	7.37474	1	37208000	47431000	33688000	0	0	0	7.35962	7.4754	7.2892	1	1	1
167	Q5SN59;B8A769;A0A0E0FQM9;A0A0E0FQN0;B9EYH5	Q5SN59;B8A769;A0A0E0FQM9;A0A0E0FQN0;B9EYH5	Ribokinase;Ribokinase;Ribokinase;Ribokinase;Ribokinase	Os01g0665400 Os01g0665400 OSNPB_010665400 P0003E08.21;OsI_03171;OsJ_02927	1.98601	0.373901	up	1.98987	1	0	8915600	0	0	0	0	1	3.96962	1	1	1	1
168	Q943F3;Q6AUF5;Q0JKK9;B8A773;A2Y7H9;A2WV44;A0A0E0FT83;A0A0E0FQP2;A0A0E0FT82;Q8RZ90;B9EYI2;A0A0E0HIH7	Q943F3;Q6AUF5;Q0JKK9;B8A773;A2Y7H9;A2WV44;A0A0E0FT83;A0A0E0FQP2;A0A0E0FT82;Q8RZ90;B9EYI2;A0A0E0HIH7	60S ribosomal protein L18a;60S ribosomal protein L18a;60S ribosomal protein L18a;60S ribosomal protein L18a;60S ribosomal protein L18a;60S ribosomal protein L18a;60S ribosomal protein L18a;60S ribosomal protein L18a;60S ribosomal protein L18a;60S ribosomal	Os01g0666900;Os05g0565000 OsJ_19561 OSJNBb0053D02.16 OSNPB_050565000;OsI_03189;OsI_03756;OsI_20997;OsJ_02939;OSJNBb0063G05.12;RPL18A Os01g0752300 LOC_Os01g54870 OsJ_03475 P0046E05.38 P0435B05.19	89.5675	9.82344e-07	up	7.4849	1	83969000	40068000	36130000	0	0	0	7.74476	7.37671	7.33324	1	1	1
169	A0A0E0HIG9;Q0JKK3;B9EYI6;A2WTL0;A2WTL5;A0A0E0FQQ4;Q9ZQW8;A2Z2M2;A0A0E0ILM0;Q6AUG0;B8AWR4	A0A0E0HIG9;Q0JKK3;B9EYI6;A2WTL0;A2WTL5;A0A0E0FQQ4;Q9ZQW8;A2Z2M2;A0A0E0ILM0;Q6AUG0;B8AWR4	Uncharacterized protein;Os01g0667800 protein;Uncharacterized protein;Uncharacterized protein;Uncharacterized protein;Uncharacterized protein;Splicing factor U2af small subunit A;Uncharacterized protein;Uncharacterized protein;Splicing factor U2af small sub	Os01g0667800 Os01g0667800 OSNPB_010667800;OsI_03197;OsI_03202;OsI_20991;OsI_31864;OsJ_02948;U2AF35A Os09g0491756 LOC_Os09g31482 OsJ_028686;U2AF35B Os05g0564200 LOC_Os05g48960 OsJ_018769 OsJ_19555 OSJNBb0053D02.11	38.2144	0.00715531	up	6.25604	1	32781000	36625000	22659000	0	0	0	7.27234	7.31503	4.18076	1	1	1
171	A0A0E0FR35;Q6Z4K6;B8B879;A0A0P0X3B5;Q84W89;Q9M2F9	A0A0E0FR35;Q6Z4K6;B8B879;A0A0P0X3B5;Q84W89;Q9M2F9	Uncharacterized protein;DEAD-box ATP-dependent RNA helicase 52B;Uncharacterized protein;Os07g0202100 protein (Fragment);DEAD-box ATP-dependent RNA helicase 37;DEAD-box ATP-dependent RNA helicase 52	Os07g0202100 OSNPB_070202100;OsI_25294;PL10B Os07g0202100 LOC_Os07g10250 OsJ_23477 OSJNBa0081K20.14;RH37 At2g42520 F14N22.21;RH52 At3g58570 F14P22.160	20.6991	0.116118	up	5.37149	1	54601000	54689000	0	0	0	0	7.56988	7.54461	1	1	1	1
172	A0A0E0FR48;Q6Z382;B8B874;Q8H852;B7EEW9;A0A0E0GJA2;B8AJK8;B9F6L0	A0A0E0FR48;Q6Z382;B8B874	Coatomer subunit gamma;Coatomer subunit gamma-2;Coatomer subunit gamma	Os03g0227000 LOC_Os03g12590 OJ1626B05.5;Os03g0227000 OSNPB_030227000;Os07g0201100 LOC_Os07g10150 OsJ_23473 P0519E02.25;OsI_10600;OsI_25286;OsJ_09998	114.68	1.45849e-09	up	7.84147	1	90586000	99932000	106540000	0	0	0	7.79595	7.83901	7.88944	1	1	1
174	A2WTT3;A0A0E0FR85	A2WTT3;A0A0E0FR85	Uncharacterized protein;Uncharacterized protein	OsI_03276	4.2154	0.116137	up	3.07567	1	18014000	15689000	0	0	0	0	4.136	4.091	1	1	1	1
175	B8A7L3;Q5QLE5;A0A0E0FR88;Q0JKD5	B8A7L3;Q5QLE5;A0A0E0FR88;Q0JKD5	Uncharacterized protein;Putative acyl-CoA synthetase;Uncharacterized protein;Os01g0681200 protein	Os01g0681200 Os01g0681200 OsJ_03021 OSNPB_010681200;OsI_03279;P0019E03.20-1	3.77914	0.116118	up	2.91806	1	5704100	0	5546000	0	0	0	3.88275	1	3.87142	1	1	1
176	B9EYM2;A2WTU1;A0A0E0FR94;Q0JKD0;A0A0P0WQL3;A0A0P0WQ30;B9FLJ1;A0A0E0HHY1;Q0DG35;B8AWG6	B9EYM2;A2WTU1;A0A0E0FR94;Q0JKD0;A0A0P0WQL3;A0A0P0WQ30;B9FLJ1;A0A0E0HHY1;Q0DG35;B8AWG6	Uncharacterized protein;Uncharacterized protein;Cytochrome c biogenesis protein CcsA;Glutamate synthase 1 [NADH], chloroplastic;Os05g0555600 protein (Fragment);Os05g0555600 protein (Fragment);Uncharacterized protein;Uncharacterized protein;Glutamate syntha	ccsA;Os01g0681900 LOC_Os01g48960;Os05g0555600 LOC_Os05g48200 OJ1214_E03.1 OJ1263_E10.17;Os05g0555600 OSNPB_050555600;OsI_03285;OsI_20922;OsJ_03025;OsJ_19492	8.57221	1.87209e-10	up	4.09967	1	16335000	16437000	14677000	0	0	0	4.11018	4.10325	4.08557	1	1	1
178	Q5N7L1;A2ZWP5;Q0JK96;A0A0P0V6T5;A2WTX4;A0A0E0FRG2	Q5N7L1;A2ZWP5;Q0JK96;A0A0P0V6T5;A2WTX4;A0A0E0FRG2	Lipase-like;Uncharacterized protein;Os01g0688200 protein;Os01g0688200 protein (Fragment);Uncharacterized protein;Uncharacterized protein	Os01g0688200;Os01g0688200 OSNPB_010688200;OsI_03323;OsJ_03062;P0519D04.28	4.36537	0.116122	up	3.12611	1	24260000	0	22515000	0	0	0	4.20063	1	4.17768	1	1	1
180	A0A0E0FRR6;A0A0P0V707;C7IWF4;Q5N9I8	A0A0E0FRR6;A0A0P0V707;C7IWF4;Q5N9I8	Uncharacterized protein;Os01g0698900 protein;Os01g0698900 protein;Alpha NAC-like protein	Os01g0698900;Os01g0698900 OSNPB_010698900;P0454A11.7	2.06754	0.373901	up	2.04792	1	0	0	19695000	0	0	0	1	1	4.14375	1	1	1
182	B7EL80;Q8S0N4;B8A8C3;A0A0E0FRY0	B7EL80;Q8S0N4;B8A8C3;A0A0E0FRY0	Os01g0707300 protein;Os01g0707300 protein;Uncharacterized protein;Uncharacterized protein	Os01g0707300 OSNPB_010707300;OsI_03452;P0692C11.36-1 P0510F09.14-1 Os01g0707300 OsJ_03196 OSNPB_010707300	1.94343	0.373901	up	1.9586	1	5519800	0	0	0	0	0	3.87581	1	1	1	1	1
183	B9EZ31;Q8LR54;A2WUA4;A0A0E0FRY4;A0A0E0FRY6	B9EZ31;Q8LR54;A2WUA4;A0A0E0FRY4;A0A0E0FRY6	Glycylpeptide N-tetradecanoyltransferase;Glycylpeptide N-tetradecanoyltransferase;Glycylpeptide N-tetradecanoyltransferase;Glycylpeptide N-tetradecanoyltransferase;Glycylpeptide N-tetradecanoyltransferase	Os01g0708100 Os01g0708100 OSNPB_010708100 P0510F09.24;OsI_03455;OsJ_03199	114.814	8.72779e-09	up	7.84315	1	85945000	117410000	99407000	0	0	0	7.76484	7.90987	7.85474	1	1	1
184	Q8LR51;A2ZX29;A2WUA6;A0A0E0FRY7	Q8LR51;A2ZX29;A2WUA6;A0A0E0FRY7	Casein kinase I-like;Uncharacterized protein;Uncharacterized protein;Uncharacterized protein	OsI_03457;OsJ_03201;P0510F09.27	32.8872	0.0817067	up	8.21748	3.17802	192160000	205980000	230960000	0	0	21369000	8.18111	8.20604	8.26528	1	1	7.53407
185	Q5NAI9;B8A8C8;B9EZ35;A0A0E0FS00;A0A0E0FRZ9	Q5NAI9;B8A8C8;B9EZ35;A0A0E0FS00;A0A0E0FRZ9	Os01g0710000 protein;Uncharacterized protein;Uncharacterized protein;Uncharacterized protein;Uncharacterized protein	Os01g0710000 Os01g0710000 OSNPB_010710000 P0456F08.15;OsI_03466;OsJ_03210	90.0236	3.80115e-07	up	7.49223	1	37892000	74225000	42104000	0	0	0	7.36508	7.69626	7.41535	1	1	1
186	Q9ASE0;Q93W07;Q7FV25;B8A8D4;A0A0E0HSR1;A0A0E0FS06;A3BCW4;A2YE72;A0A0E0FS05;A0A0P0WXV2;Q710P5	Q9ASE0;Q93W07;Q7FV25;B8A8D4;A0A0E0HSR1;A0A0E0FS06;A3BCW4;A2YE72;A0A0E0FS05;A0A0P0WXV2	Os01g0711000 protein;Os06g0568200 protein;Vacuolar ATPase B subunit;Uncharacterized protein;Uncharacterized protein;Uncharacterized protein;Uncharacterized protein;Uncharacterized protein;Uncharacterized protein;Os06g0568200 protein (Fragment)	Os01g0711000 Os01g0711000 B1142C05.1 OsJ_03215 OSNPB_010711000 P0456F08.26;Os06g0568200 OSNPB_060568200;OsI_03471;OsI_23416;OsJ_21740;V-ATPase B Os06g0568200 OSJNBa0062E01.5 OSNPB_060568200 P0567G03.43;xd19	1.10881	0.102185	up	8.41622	8.26721	333630000	268730000	396270000	164320000	153780000	119280000	8.40131	8.32664	8.5207	8.31366	8.30501	8.18295
188	A0A0E0FS09;A0A0E0FS10;Q6V9T1;A2WUC5;A2ZX46;Q5N8C7;Q5N8C8;A0A0P0V7A3;Q5N8C9;A0A0E0FS11;Q6RS61;Q0DAZ7	A0A0E0FS09;A0A0E0FS10;Q6V9T1;A2WUC5;A2ZX46;Q5N8C7;Q5N8C8;A0A0P0V7A3;Q5N8C9;A0A0E0FS11;Q6RS61;Q0DAZ7	Glycine cleavage system P protein;Glycine cleavage system P protein;Glycine cleavage system P protein;Glycine cleavage system P protein;Glycine cleavage system P protein;P protein-like;P protein-like;Os01g0711400 protein (Fragment);P protein-like;Glycine c	B1142C05.6-1 P0456F08.31-1;B1142C05.6-2 P0456F08.31-2;B1142C05.6-3 P0456F08.31-3;GDC;Os01g0711400;Os01g0711400 OSNPB_010711400;Os06g0611900;OsI_03474;OsJ_03218	5.99453	0.302194	up	7.94432	5.36068	124640000	175910000	80292000	27866000	0	18565000	7.956	8.12642	7.75055	7.60243	1	7.4796
192	Q8W0D1;A0A0E0FSF9	Q8W0D1;A0A0E0FSF9	Os01g0721900 protein;Uncharacterized protein	P0690B02.26-1 Os01g0721900 OSNPB_010721900	105.38	8.2813e-09	up	7.71946	1	73246000	91145000	68887000	0	0	0	7.68783	7.80072	7.66983	1	1	1
194	A2ZXD8;Q8W0C2;Q5Z9S4;B8B3L8;A2WUL8;A0A0E0FSH3;Q0DBK8;Q6H541;A2X2N6;A0A0E0G3U1;A3A4S5	A2ZXD8;Q8W0C2;Q5Z9S4;B8B3L8;A2WUL8;A0A0E0FSH3;Q0DBK8;Q6H541;A2X2N6;A0A0E0G3U1;A3A4S5	40S ribosomal protein S24;40S ribosomal protein S24;40S ribosomal protein S24;40S ribosomal protein S24;40S ribosomal protein S24;40S ribosomal protein S24;40S ribosomal protein S24 (Fragment);40S ribosomal protein S24;40S ribosomal protein S24;40S ribosom	Os01g0723200 Os01g0723200 OSNPB_010723200 P0022F10.13 P0690B02.40;Os02g0229000 Os02g0229000 OSJNBb0035N08.11 OSNPB_020229000 P0620H05.37;Os06g0555400 Os06g0555400 OSNPB_060555400;OsI_03571;OsI_06448;OsI_23353;OsJ_03304;OsJ_05968;OsJ_21676 P0458E11.17	10.6896	0.187262	up	8.70923	5.2911	537930000	403850000	1382400000	0	15927000	17508000	8.60712	8.50866	9.01191	1	7.40819	7.46509
195	A0A0P0V7M3;A0A0E0FSH5;Q0JJQ7;Q9FRT2;B9EZH0;B8A8R6;A0A0E0FSH4;Q5JNA0;A6N1B7;A6N1I8;A6N127;Q5JN99;A0A0P0V7L8;A0A0E0HAJ1;B9FMV0;Q6T5D1;A2Y154	A0A0P0V7M3;A0A0E0FSH5;Q0JJQ7;Q9FRT2;B9EZH0;B8A8R6;A0A0E0FSH4;Q5JNA0;A6N1B7;A6N1I8;A6N127;Q5JN99;A0A0P0V7L8	Malic enzyme (Fragment);Malic enzyme;Malic enzyme (Fragment);Malic enzyme;Malic enzyme;Malic enzyme;Malic enzyme;Malic enzyme;NADP-dependent malic enzyme (Fragment);NADP-dependent malic enzyme (Fragment);NADP-dependent malic enzyme (Fragment);Malic enzyme;	NADP-ME2;Os01g0723400 Os01g0723400 OSNPB_010723400;Os01g0723400 OSNPB_010723400;Os05g0186300 OSNPB_050186300;OsI_03572;OsI_18741;OsJ_03305;OsJ_17383;P0022F10.15-1;P0022F10.15-2	95.9605	4.71561e-11	up	7.58437	1	54674000	57269000	62084000	0	0	0	7.57014	7.5769	7.60607	1	1	1
196	Q5JM42;B8A901;A0A0P0V7P7;B9EZI3;A0A0E0FSM3;A0A0E0FSM2	Q5JM42;B8A901;A0A0P0V7P7;B9EZI3;A0A0E0FSM3;A0A0E0FSM2	HVA22-like protein;HVA22-like protein;HVA22-like protein;Uncharacterized protein;Uncharacterized protein;Uncharacterized protein	Os01g0728150 OSNPB_010728150;OsI_03599;OsJ_03330;P0042A10.48 P0456A01.12	11.1141	0.0004993	up	4.47432	1	17919000	29935000	19364000	0	0	0	4.13393	5.14828	4.14076	1	1	1
198	A0A0E0FSR3;Q942D4;A2WUT0	A0A0E0FSR3;Q942D4;A2WUT0	Uncharacterized protein;BURP domain-containing protein 3;Uncharacterized protein	BURP3 Os01g0733500 LOC_Os01g53240 B1060H01.8 OsJ_03360 OSJNBb0036G09.19;OsI_03637	4.29954	0.116121	up	3.10418	1	0	20197000	21658000	0	0	0	1	4.14527	4.16728	1	1	1
202	Q5JNL6;A2ZXM9;B8A9G6;A0A0E0FSV9	Q5JNL6;A2ZXM9;B8A9G6;A0A0E0FSV9	Mitochondrial processing peptidase;Uncharacterized protein;Uncharacterized protein;Uncharacterized protein	Os01g0739000 OSNPB_010739000 P0638D12.13;OsI_03671;OsJ_03392	1.02112	0.308758	up	8.33135	8.3012	292770000	263700000	266870000	150030000	148000000	177000000	8.35376	8.31366	8.32664	8.2711	8.28606	8.34644
203	Q8LQ68;A2WUX9;A0A0E0FSZ1;A2ZXP7	Q8LQ68;A2WUX9;A0A0E0FSZ1;A2ZXP7	Hexokinase-6;Phosphotransferase;Phosphotransferase;Phosphotransferase	HXK6 HXK2 Os01g0742500 LOC_Os01g53930 P0439E07.19;OsI_03691;OsJ_03410	180.933	3.42416e-08	up	8.49931	1	301840000	437010000	451530000	0	0	0	8.36894	8.56301	8.56597	1	1	1
204	B8A9E3;A0A0E0FT14;Q5JLY8	B8A9E3;A0A0E0FT14;Q5JLY8	Uncharacterized protein;Uncharacterized protein;Golgin-84	Os01g0744400 LOC_Os01g54119 OsJ_03424 OSJNBa0014K08.9;OsI_03707	1.22349	0.373901	up	1.291	1	1729800	0	0	0	0	0	1.873	1	1	1	1	1
205	A2ZXS2;Q0JJD4;A2WV04;A0A0E0FT25	A2ZXS2;Q0JJD4;A2WV04;A0A0E0FT25	Uncharacterized protein;Mannan endo-1,4-beta-mannosidase 2;Uncharacterized protein;Uncharacterized protein	MAN2 Os01g0746700 LOC_Os01g54300 OSJNBa0014K08.42 P0481E12.1;OsI_03716;OsJ_03436	8.31905	1.04917e-10	up	4.05642	1	12975000	13996000	12041000	0	0	0	4.05815	4.06627	4.04483	1	1	1
206	A2ZXV0;Q5JN63;A2WV32;A0A0E0FT59;A0A0P0V889;A2ZLJ3;A0A0P0WS24;B8B9Z1;C7J5V0;A0A0E0H7V4;Q8W3F9;A2ZAK8;A0A0P0XES5;Q7EZW6;A0A0E0JAT2;Q9LHZ7;A2YU42;A0A0E0HJT8;Q2QNS6;A0A0E0I3W2	A2ZXV0;Q5JN63;A2WV32;A0A0E0FT59;A0A0P0V889;A2ZLJ3;A0A0P0WS24;B8B9Z1;C7J5V0;A0A0E0H7V4;Q8W3F9;A2ZAK8;A0A0P0XES5;Q7EZW6;A0A0E0JAT2;Q9LHZ7;A2YU42;A0A0E0HJT8;Q2QNS6;A0A0E0I3W2	Uncharacterized protein;Cellulose synthase A catalytic subunit 4 [UDP-forming];Cellulose synthase A catalytic subunit 4 [UDP-forming];Uncharacterized protein;Os01g0750300 protein;Uncharacterized protein;Os06g0111800 protein (Fragment);Uncharacterized prote	CESA4 Os01g0750300 LOC_Os01g54620 P0046E05.4;CESA4 OsI_03742;CSLD1 Os10g0578200 LOC_Os10g42750 OsJ_031301 OSJNBa0035H01.10;CSLD1 OsI_34786;CSLD2 Os06g0111800 LOC_Os06g02180 OsJ_019064 P0029D06.17;CSLD2 OsI_027835;CSLD3 Os08g0345500 LOC_Os08g25710 OsJ_025895 P0410E11.117;CSLD4 Os12g0555600 LOC_Os12g36890 OsJ_035046;Os01g0750300 OSNPB_010750300;Os06g0111800 OSNPB_060111800;Os08g0345500;Os08g0345500…	2.00652	0.373901	up	2.0047	1	10485000	0	0	0	0	0	4.01409	1	1	1	1	1
207	Q5JMM6;B8A9U0;A2ZXX0;A0A0E0FT91	Q5JMM6;B8A9U0;A2ZXX0;A0A0E0FT91	Os01g0753100 protein;Uncharacterized protein;Uncharacterized protein;Uncharacterized protein	Os01g0753100 Os01g0753100 OSNPB_010753100 P0435B05.30 P0503C12.2;OsI_03764;OsJ_03482	112.2	8.11322e-08	up	7.80992	1	104560000	111920000	68557000	0	0	0	7.86958	7.89635	7.66384	1	1	1
208	P37833;A2WVA6;A1YQJ2;Q0JJ47;A0A0E0FTF9	P37833;A2WVA6;A1YQJ2;Q0JJ47;A0A0E0FTF9	Aspartate aminotransferase, cytoplasmic;Aspartate aminotransferase;Aspartate aminotransferase;Aspartate aminotransferase;Aspartate aminotransferase	Os01g0760600 LOC_Os01g55540 P0460E08.21 P0512C01.10;Os01g0760600 Os01g0760600 OSNPB_010760600;OsI_03821;OsJ_03530;psbJ	106.899	8.47646e-12	up	7.7401	1	82450000	83952000	77918000	0	0	0	7.73275	7.7548	7.73275	1	1	1
210	A2WVB6;A0A0E0FTH6	A2WVB6;A0A0E0FTH6	Uncharacterized protein;Uncharacterized protein	OsI_03832	2.05128	0.373901	up	2.03652	1	16322000	0	0	0	0	0	4.10957	1	1	1	1	1
212	A2WVH5;Q94EF4;A0A0E0FTP7	A2WVH5;Q94EF4;A0A0E0FTP7	Uncharacterized protein;Os01g0769700 protein;Uncharacterized protein	Os01g0769700 B1143G03.32 OsJ_03602 OSNPB_010769700 P0665A11.8;OsI_03893	2.59093	0.605185	up	7.27613	5.90266	33025000	34368000	33769000	0	186940000	164400000	7.2802	7.25619	7.292	1	8.38553	8.32245
215	Q8S1I8;B8AA60;A0A0E0FTT1;Q7XB57;A2Y6D8;A0A0E0HGR9	Q8S1I8;B8AA60;A0A0E0FTT1	Signal recognition particle 54 kDa protein;Signal recognition particle 54 kDa protein;Signal recognition particle 54 kDa protein	OsI_03915;OsI_20572;srp54-1 Os01g0772800 OsJ_03626 OSNPB_010772800 P0490D09.4 P0695H10.26;srp54-2 Os05g0509500 OsJ_19149 OSJNBb0108E17.16 OSNPB_050509500	147.04	2.98841e-10	up	8.20007	1	222480000	196970000	193840000	0	0	0	8.23808	8.17736	8.18476	1	1	1
216	A0A0E0FTX8;Q5ZCF3;B9ETB6;B8AAE2	A0A0E0FTX8;Q5ZCF3;B9ETB6;B8AAE2	Uncharacterized protein;Os01g0778700 protein;Uncharacterized protein;Uncharacterized protein	Os01g0778700 Os01g0778700 OSNPB_010778700 P0010B10.5;OsI_03961;OsJ_03668	2.01067	0.373901	up	2.00768	1	0	0	10877000	0	0	0	1	1	4.02303	1	1	1
218	Q6Z7B0;A2X036;A0A0E0FTZ5;A0A0P0VDX8	Q6Z7B0;A2X036;A0A0E0FTZ5	Heat shock 70 kDa protein BIP1;Uncharacterized protein;Uncharacterized protein	BIP1 BIP Os02g0115900 LOC_Os02g02410 OJ1442_E05.10 OsJ_05115 P0036E06.29;Os02g0115900 OSNPB_020115900;OsI_05577	8.45235	0.281838	up	9.03119	5.95183	1975100000	1109500000	1023400000	226860000	0	200050000	9.21848	8.98681	8.88827	8.44728	1	8.40823
220	Q6Z754;B8AI27;A0A0E0FU51	Q6Z754;B8AI27;A0A0E0FU51	Os02g0735100 protein;Uncharacterized protein;Uncharacterized protein	Os02g0735100 Os02g0735100 OsJ_08294 OSNPB_020735100 P0487D09.7;OsI_08841	1.75217	0.759954	up	6.26863	5.45949	42031000	18869000	32147000	0	30831000	34766000	7.43059	4.13172	7.24358	1	7.64459	7.73389
221	Q8LQN2;A2WVT8;A0A0E0FU82;B8AZT6;Q60EJ3;A2Y683;A0A0E0HGH2	Q8LQN2;A2WVT8;A0A0E0FU82	Os01g0784800 protein;Uncharacterized protein;Uncharacterized protein	Os01g0784800 B1070A12.15 OsJ_03705 OSNPB_010784800;Os05g0501300 Os05g0501300 OSJNBa0017K09.5 OSNPB_050501300;OsI_04011;OsI_20505;OsI_20508	1.93547	0.373901	up	1.95268	1	5182200	0	0	0	0	0	3.85805	1	1	1	1	1
223	Q8S1G9;A2WVZ2;A0A0E0FUE0;A0A0P0V977	Q8S1G9;A2WVZ2;A0A0E0FUE0;A0A0P0V977	Os01g0796400 protein;Uncharacterized protein;Uncharacterized protein;Os01g0796400 protein	Os01g0796400 OSNPB_010796400;OsI_04066;P0699H05.27-1 Os01g0796400 OsJ_03749 OSNPB_010796400	18.0149	0.0149776	up	5.17112	1	18308000	32498000	21117000	0	0	0	4.14108	7.21085	4.16142	1	1	1
224	A0A0E0FUF7;Q5VQL0;Q5VQK9;B8AAV3;A0A0E0FUF6	A0A0E0FUF7;Q5VQL0;Q5VQK9;B8AAV3;A0A0E0FUF6	Uncharacterized protein;Os01g0798500 protein;Protein CHLOROPLAST ENHANCING STRESS TOLERANCE, chloroplastic;Protein CHLOROPLAST ENHANCING STRESS TOLERANCE, chloroplastic;Uncharacterized protein	CEST Os01g0798500 LOC_Os01g58470 OsJ_03754 P0691E06.11-1;CEST OsI_04075;P0691E06.11-2 Os01g0798500 OSNPB_010798500	2.07713	0.373901	up	2.05459	1	20372000	0	0	0	0	0	4.16377	1	1	1	1	1
225	Q5VR53;Q94J90;A2WW59;A0A0E0FUM6	Q5VR53;Q94J90;A2WW59;A0A0E0FUM6	Os01g0807900 protein;Os01g0807900 protein;Uncharacterized protein;Uncharacterized protein	OsI_04141;P0702B09.41-1 Os01g0807900 OsJ_03812 OSNPB_010807900;P0702B09.41-2 Os01g0807900 OSNPB_010807900	8.2108	1.79225e-07	up	4.03752	1	8736700	11185000	17069000	0	0	0	3.97954	4.01892	4.11411	1	1	1
226	B9ETU6;B8AB91;A0A0E0FUT1;Q5VQR0;Q7F2H9	B9ETU6;B8AB91;A0A0E0FUT1;Q5VQR0;Q7F2H9	Uncharacterized protein;Uncharacterized protein;Uncharacterized protein;Os01g0812900 protein;p0432B10.9 protein	Os01g0812900 OSJNBa0085D07.3 OSNPB_010812900 P0425G02.34;OsI_04178;OsJ_03840;P0432B10.9	136.67	3.48986e-11	up	8.09456	1	160170000	159060000	164490000	0	0	0	8.11193	8.07413	8.09761	1	1	1
227	A6MZG8;Q5N760;A2WWB5;A0A0E0FUV5	A6MZG8;Q5N760;A2WWB5;A0A0E0FUV5	NADH cytochrome b5 reductase (Fragment);NADH-cytochrome b5 reductase;NADH-cytochrome b5 reductase;NADH-cytochrome b5 reductase	Os01g0814900 Os01g0814900 OsJ_03855 OSJNBa0085D07.31 OSNPB_010814900;OsI_04196	4.65246	0.394227	up	7.84359	5.6256	60909000	199330000	76638000	0	130130000	27457000	7.61821	8.18661	7.72596	1	8.23309	7.64371
228	A0A0E0FUY0;B8ABA7;A0A0E0FUX9;Q5QMK7;A2ZZ01;A0A0E0GLW2;Q0DS66;Q10LY9;A2XGA4	A0A0E0FUY0;B8ABA7;A0A0E0FUX9;Q5QMK7;A2ZZ01	Uncharacterized protein;Uncharacterized protein;Uncharacterized protein;Os01g0817700 protein;Uncharacterized protein	Os01g0817700 Os01g0817700 B1148D12.28 OSNPB_010817700 P0454H12.17;Os03g0330200;Os03g0330200 LOC_Os03g21260 OsJ_10707 OSNPB_030330200;OsI_04213;OsI_11413;OsJ_03874	6.50421	0.291192	up	8.14757	5.4462	171730000	161230000	211090000	30806000	0	30182000	8.1428	8.08688	8.21303	7.65076	1	7.68783
229	A0A0E0FV16;Q5QLZ5;B8ABB7;A0A0E0FV15	A0A0E0FV16;Q5QLZ5;B8ABB7;A0A0E0FV15	Uncharacterized protein;Os01g0819900 protein;Uncharacterized protein;Uncharacterized protein	OJ1529_G03.21-1 Os01g0819900 OsJ_19897 OSNPB_010819900;OsI_04229	2.0623	0.373901	up	2.04425	1	0	0	18536000	0	0	0	1	1	4.13276	1	1	1
230	A0A0E0FV28;A0A0E0FV29;A0A0E0FV27;B8ABC6;Q5QM65;B9EU73	A0A0E0FV28;A0A0E0FV29;A0A0E0FV27;B8ABC6;Q5QM65;B9EU73	Uncharacterized protein;Uncharacterized protein;Uncharacterized protein;Uncharacterized protein;Os01g0821700 protein;Uncharacterized protein	Os01g0821700 OSNPB_010821700 P0485B12.14 P0703B11.23;OsI_04240;OsJ_03898	80.1098	1.87447e-08	up	7.32391	1	40079000	33631000	36564000	0	0	0	7.39414	7.23395	7.34364	1	1	1
232	Q5QM60;A2WWG7;A0A0E0FV42	Q5QM60;A2WWG7;A0A0E0FV42	Non-specific lipid-transfer protein;Non-specific lipid-transfer protein;Non-specific lipid-transfer protein	Os01g0822900 Os01g0822900 OsJ_03904 OSNPB_010822900 P0031D02.1 P0485B12.33;OsI_04247	8.35181	8.66758e-08	up	4.06209	1	9823200	13764000	17477000	0	0	0	4.00301	4.06397	4.11928	1	1	1
234	Q5QLT6;A0A0E0FVA3;A0A0E0FVA2;B9EU97;B8ABM9;B7EBZ5	Q5QLT6;A0A0E0FVA3;A0A0E0FVA2;B9EU97;B8ABM9;B7EBZ5	Os01g0830100 protein;Uncharacterized protein;Uncharacterized protein;Uncharacterized protein;Uncharacterized protein;Os01g0830100 protein	B1088C09.41-1 P0446G04.14-1 Os01g0830100 OSNPB_010830100;Os01g0830100 OSNPB_010830100;OsI_04297;OsJ_03953	1.02002	0.992941	up	5.31016	5.28157	46195000	44461000	0	17765000	16129000	0	7.49065	7.43983	1	7.43159	7.41311	1
235	Q8S1T0;A2WWR0;A0A0E0FVF2;Q5QMH3;A0A0P0V9Z5;Q5QMH4;A0A0P0VA55	Q8S1T0;A2WWR0;A0A0E0FVF2;Q5QMH3;A0A0P0V9Z5;Q5QMH4;A0A0P0VA55	Os01g0835500 protein;Uncharacterized protein;Uncharacterized protein;Putative respiratory burst oxidase;Os01g0835500 protein (Fragment);Putative respiratory burst oxidase;Os01g0835500 protein	Os01g0835500 OSNPB_010835500;OsI_04336;P0506B12.18-1 Os01g0835500 OsJ_03990 OSNPB_010835500;P0506B12.18-2;P0506B12.18-3	4.2987	0.116148	up	3.1039	1	22457000	18523000	0	0	0	0	4.18398	4.12772	1	1	1	1
236	Q7XUC9;A2WWR4;A0A0E0FVF8;B9FJJ7;A0A0E0JBK9;A6N0V4;Q10SK4;A0A0E0J8C1	Q7XUC9;A2WWR4;A0A0E0FVF8;B9FJJ7;A0A0E0JBK9	Histone H4;Histone H4;Histone H4;Histone H4;Histone H4	LOC_Os03g02780;Os04g0583600 OSJNBb0064P21.1 P0534A03.129 LOC_Os03g02780 LOC_Os10g39410 Os01g0835900 Os02g0684500 Os03g0119900 Os04g0583600 Os05g0462700 Os05g0466600 Os07g0549900 Os09g0433600 Os09g0553100 Os10g0539500 OJ1081_G10.11 OJ1212_A08.14 OJ1263H11.10 OJ1280_A04.1 OJ1387_F08.9 OJ1525_A02.10 OJ1717_A09.1 OsJ_03994 OsJ_07955 OsJ_09199 OsJ_15915 OsJ_18829 OsJ_24666 OsJ_29473 OsJ_30268 OsJ_3230…	2.70346	0.00214832	up	9.49588	8.06108	4338500000	4164700000	4058300000	148770000	31509000	145390000	9.48757	9.51909	9.48099	8.26723	7.65402	8.26197
239	Q5QMH0;A0A0E0FVH7;Q5QMH1;B8B7Q1;B7FAF4;A2WWS5;Q6ZLD7;A0A0E0HXC7	Q5QMH0;A0A0E0FVH7;Q5QMH1;B8B7Q1;B7FAF4;A2WWS5;Q6ZLD7;A0A0E0HXC7	RuvB-like helicase;RuvB-like helicase;RuvB-like helicase;RuvB-like helicase;RuvB-like helicase;RuvB-like helicase;RuvB-like helicase;RuvB-like helicase	OJ1361_E02.120 OJ1014_E09.2;Os07g0178900 OsJ_23313 OSNPB_070178900;OsI_04353;OsI_25110;P0506B12.43-1 Os01g0837500 OsJ_04005 OSNPB_010837500;P0506B12.43-2 Os01g0837500 OSNPB_010837500	4.28652	0.116145	up	3.09981	1	0	23732000	17584000	0	0	0	1	4.17638	4.12304	1	1	1
242	Q9FPE6;Q8LQ33;B8ACF5;A0A0E0FVU1	Q9FPE6;Q8LQ33;B8ACF5;A0A0E0FVU1	Alpha-1,4 glucan phosphorylase (Fragment);Alpha-1,4 glucan phosphorylase;Alpha-1,4 glucan phosphorylase;Alpha-1,4 glucan phosphorylase	Os01g0851700 OsJ_04098 OSNPB_010851700 P0529H11.34;OsI_04460	84.9854	8.76894e-10	up	7.40914	1	43440000	40995000	39198000	0	0	0	7.45183	7.39889	7.37671	1	1	1
243	A0A0E0FVU6;A0A0P0VAE6;A0A0P0VAE3;A0A0E0FVU7;Q8W0H5;A0A0E0FVU5;B9EUG1;B8ACF6	A0A0E0FVU6;A0A0P0VAE6;A0A0P0VAE3;A0A0E0FVU7;Q8W0H5;A0A0E0FVU5;B9EUG1;B8ACF6	Uncharacterized protein;Os01g0852200 protein (Fragment);Os01g0852200 protein;Uncharacterized protein;Probable anion transporter 3, chloroplastic;Uncharacterized protein;Uncharacterized protein;Uncharacterized protein	3 Os01g0852200 LOC_Os01g63290 P0529E05.4-1 P0529E05.4-2 P0529H11.39-1 P0529H11.39-2;Os01g0852200 OSNPB_010852200;OsI_04461;OsJ_04099;PHT4	2.08476	0.373901	up	2.05988	1	0	0	22594000	0	0	0	1	1	4.17964	1	1	1
244	Q5N7F6;A0A0E0FW39;Q94CU3;A2WXA2;A0A0E0FW40	Q5N7F6;A0A0E0FW39;Q94CU3;A2WXA2;A0A0E0FW40	Uricase;Uricase;Uricase;Uricase;Uricase	OsI_04547;P0423B08.43-1 P0505D12.9-1 Os01g0865100 OsJ_04190 OSNPB_010865100;P0423B08.43-2 Os01g0865100 P0505D12.9-2 OSNPB_010865100	5.60735	0.00192182	up	3.48732	1	3214800	3482400	6289100	0	0	0	2.80621	3.75567	3.90008	1	1	1
245	P0C542;P0C540;A2ZZX3;A0A0E0FW49;A2WXB0;A0A0P0VAT4;Q5N9D7;I7DM04;B2ZEU9	P0C542;P0C540;A2ZZX3;A0A0E0FW49;A2WXB0;A0A0P0VAT4;Q5N9D7	Actin-7;Actin-7;Uncharacterized protein;Uncharacterized protein;Uncharacterized protein;Os01g0866100 protein;Actin-like protein	Act;ACT7 AC7 RAC7;ACT7 AC7 RAC7 Os01g0866100 LOC_Os01g64630 P0505D12.32-2;Os01g0866100 OSNPB_010866100;OsI_04555;OsJ_04196;P0505D12.32-1	5.52638	0.122954	up	3.46634	1	26007000	30194000	0	0	0	0	4.21285	5.18615	1	1	1	1
246	B9FPT5;A0A0P0WTA4;Q2RAD9;J3MFG2;D6PYM8;B8B1H8;B7F6J5;A2Y533;A0A0E0KQH9;A0A0E0FW50;Q53NE3;A0A0P0WSK4;C7J3T3;A0A0E0HRS8;A0A0P0WA64;D6PYN0;D6PYM9;Q2QSX0;Q2QSW7;Q0JCT1;D9J2J6;B8AUE9;A3AUC6;A2ZJV2;A2XHJ3;A0A0E0IBM3;A0A0E0H1J4;A0A0E0GNK7;B8A6X4;A0A0P0WRT9;A0A0E0IBM2;A2Y8W0;Q40727;A6N091;A0A0P0WBB0;A0A0P0VZ24;A2ZJV1;A0A0E0HG60;A0A0E0HG59;Q6T367;B8AZH6;A0A0E0HG58;B9FRM3;Q7XV46	B9FPT5;A0A0P0WTA4;Q2RAD9;J3MFG2;D6PYM8;B8B1H8;B7F6J5;A2Y533;A0A0E0KQH9;A0A0E0FW50;Q53NE3;A0A0P0WSK4;C7J3T3;A0A0E0HRS8;A0A0P0WA64;D6PYN0;D6PYM9;Q2QSX0;Q2QSW7;Q0JCT1;D9J2J6;B8AUE9;A3AUC6;A2ZJV2;A2XHJ3;A0A0E0IBM3;A0A0E0H1J4;A0A0E0GNK7;B8A6X4;A0A0P0WRT9;A0A0E0IBM2;A2Y8W0	Uncharacterized protein;Os06g0159725 protein (Fragment);Histone H3.2;Histone H3;Histone H3;Histone H3;Histone H3;Histone H3.2;Histone H3;Histone H3;Histone H3-maize;Os06g0160100 protein (Fragment);Os06g0159750 protein;Uncharacterized protein;Os04g0419600 p	H0815C01.1 H0818E04.22;H3R-11 Os06g0159501 LOC_Os06g06460 OsJ_019386 P0702F05.33;H3R-21 Os11g0155900 LOC_Os11g05730 OSJNBb0030I09;Os04g0419600 LOC_Os04g34240 OsJ_014206 OSJNBb0108J11.17;Os04g0450800 LOC_Os04g37780;Os05g0438700 LOC_Os05g36280 OSJNBb0042J17.11;Os06g0130900 LOC_Os06g04030 P0493C11.10;Os06g0160001 P0681F10.3 P0702F05.38;Os06g0160100 LOC_Os06g06510 P0681F10.4 P0702F05.39;OsI_021009;Os…	146.639	3.59882e-09	up	8.19613	1	175900000	191320000	231420000	0	0	0	8.15689	8.16427	8.26723	1	1	1
247	A0A0P0VAU9;B8A6Y6;A2ZZZ5;Q8S1N3;A0A0E0FW90	A0A0P0VAU9;B8A6Y6;A2ZZZ5;Q8S1N3;A0A0E0FW90	Os01g0868900 protein (Fragment);Uncharacterized protein;Uncharacterized protein;Os01g0868900 protein;Uncharacterized protein	Os01g0868900 OSNPB_010868900;Os01g0868900 OSNPB_010868900 P0677H08.26;OsI_04579;OsJ_04216	1.83397	0.725697	up	4.19921	3.32424	24745000	24235000	26222000	69481000	0	0	4.20363	4.18094	4.21306	7.97271	1	1
250	A3A041;A2WXH7;Q8RYZ1;A0A0E0FWE7;Q5N8X1	A3A041;A2WXH7;Q8RYZ1;A0A0E0FWE7	Uncharacterized protein;Uncharacterized protein;Cytosolic factor-like protein;Uncharacterized protein	OsI_04628;OsJ_04261;P0648C09.9 P0698A10.10-1 Os01g0874700 OSNPB_010874700;P0698A10.10-2 Os01g0874700 OSNPB_010874700	171.577	8.3118e-07	up	8.42271	1	511410000	182330000	411760000	0	0	0	8.59752	8.13864	8.53198	1	1	1
251	A0A0P0VB21;Q0JH95;A0A0E0FWG3;B8A716;Q8LR16	A0A0P0VB21;Q0JH95;A0A0E0FWG3;B8A716;Q8LR16	Os01g0876400 protein (Fragment);Os01g0876400 protein (Fragment);Uncharacterized protein;Uncharacterized protein;Membrane protein CH1-like	Os01g0876400 Os01g0876400 OSNPB_010876400;Os01g0876400 OSNPB_010876400;OsI_04640;P0698A10.35-1 Os01g0876400 OsJ_04271 OSNPB_010876400	1.96697	0.373901	up	1.97597	1	0	0	7366100	0	0	0	1	1	3.92792	1	1	1
252	A2WXK1;A0A0E0FWI8;B9EUY1;Q5N9H2;A0A088MWT3	A2WXK1;A0A0E0FWI8;B9EUY1;Q5N9H2;A0A088MWT3	Uncharacterized protein;Uncharacterized protein;Uncharacterized protein;Os01g0878700 protein;Amino acid permease	AAP6;Os01g0878700 Os01g0878700 OSNPB_010878700 P0018C10.17 P0471B04.28;OsI_04651;OsJ_04283	1.73496	0.738641	up	4.01687	3.22197	13999000	10972000	8698500	0	0	28776000	4.07744	4.01113	3.96202	1	1	7.6659
255	Q5N7I4;A2WXN8;Q0JH49;A0A0E0FWN6	Q5N7I4;A2WXN8;Q0JH49;A0A0E0FWN6	Ankyrin-like protein;Uncharacterized protein;Os01g0883900 protein;Uncharacterized protein	B1065E10.47 OsJ_04316;Os01g0883900 Os01g0883900 OSNPB_010883900;OsI_04689	7.77868	1.00343e-07	up	3.95953	1	11273000	7931900	6735300	0	0	0	4.02488	3.94084	3.91285	1	1	1
256	A2WXT1;Q5N838;Q0JH17;A0A0E0FWT4	A2WXT1;Q5N838;Q0JH17;A0A0E0FWT4	Uncharacterized protein;Rhodanese domain-containing protein-like;Os01g0889800 protein;Uncharacterized protein	B1099D03.45 OsJ_04356;Os01g0889800 Os01g0889800 OSNPB_010889800;OsI_04733	21.9271	0.116146	up	5.45464	1	0	80785000	63605000	0	0	0	1	7.73938	7.62455	1	1	1
258	A0A0E0FWV3	A0A0E0FWV3	Chlorophyll a-b binding protein, chloroplastic		19.4616	0.0244491	up	5.28256	1	80003000	9738800	19826000	0	0	0	7.71409	3.98775	4.14583	1	1	1
259	Q0JGZ6;A2WXV8;A0A0E0FWY7;A0A0E0FWY6;A0A0E0FWY5;B9EVB6;B8A7T8	Q0JGZ6;A2WXV8;A0A0E0FWY7;A0A0E0FWY6;A0A0E0FWY5;B9EVB6;B8A7T8	Fructokinase-1;Fructokinase-1;Uncharacterized protein;Uncharacterized protein;Uncharacterized protein;Uncharacterized protein;Uncharacterized protein	FRK1 FKI Os01g0894300 LOC_Os01g66940 B1078G07.45-1 B1078G07.45-2 P0696G06.9;FRK1 FKI OsI_004651;OsI_04762;OsJ_04386	11.6025	0.000468706	up	4.53636	1	24202000	26073000	29222000	0	0	0	4.19969	4.19811	5.21128	1	1	1
260	Q5JLV2;B8A7T9;A0A0E0FWZ0;Q7F441;B9EVB7	Q5JLV2;B8A7T9;A0A0E0FWZ0;Q7F441;B9EVB7	Os01g0894700 protein;Uncharacterized protein;Uncharacterized protein;p0696G06.13 protein;Uncharacterized protein	Os01g0894700 Os01g0894700 B1078G07.49 OSNPB_010894700;OsI_04765;OsJ_04389;P0696G06.13	1.98386	0.373901	up	1.98831	1	7991200	0	0	0	0	0	3.96494	1	1	1	1	1
266	A0A0E0FX89;B9EVG2;B8A7T5	A0A0E0FX89;B9EVG2;B8A7T5	Uncharacterized protein;Uncharacterized protein;Uncharacterized protein	OsI_04841;OsJ_04465	1.89546	0.373901	up	1.92255	1	0	0	2591000	0	0	0	1	1	3.76764	1	1	1
268	Q8L416;A2WY49;A0A0E0FXA6	Q8L416;A2WY49;A0A0E0FXA6	Os01g0908400 protein;Uncharacterized protein;Uncharacterized protein	OsI_04854;P0497A05.16 Os01g0908400 B1417F08.34 OsJ_04477 OSNPB_010908400 P0456E05.7	6.76031	0.27309	up	8.09997	5.34288	139780000	172930000	183490000	22999000	0	19403000	8.03142	8.11688	8.15161	7.53176	1	7.49688
269	A0A0P0VC15;B9EVH9;A0A0E0FXF1;A0A0E0FXE8;A0A0E0FXE9;A0A0E0FXF0;A0A0E0FXF2;Q5N7W4;A0A0P0VBW9	A0A0P0VC15;B9EVH9;A0A0E0FXF1;A0A0E0FXE8;A0A0E0FXE9;A0A0E0FXF0;A0A0E0FXF2;Q5N7W4;A0A0P0VBW9	Os01g0911100 protein;Uncharacterized protein;Uncharacterized protein;Uncharacterized protein;Uncharacterized protein;Uncharacterized protein;Uncharacterized protein;DEAD-box ATP-dependent RNA helicase 30;Os01g0911100 protein (Fragment)	Os01g0911100 LOC_Os01g68320 P0456E05.41-1 P0456E05.41-2 P0470A12.9-1 P0470A12.9-2;Os01g0911100 OSNPB_010911100;OsJ_04500	2.09543	0.373901	up	2.06725	1	0	0	25041000	0	0	0	1	1	4.20175	1	1	1
270	Q5N7X9;Q0JGQ4;B9EVI2;A0A0E0FXF8;A0A0E0FXF7;B8A841	Q5N7X9;Q0JGQ4;B9EVI2;A0A0E0FXF8;A0A0E0FXF7;B8A841	Putative ABC protein;Os01g0911300 protein (Fragment);Uncharacterized protein;Uncharacterized protein;Uncharacterized protein;Uncharacterized protein	Os01g0911300 Os01g0911300 OSNPB_010911300;OsI_04878;OsJ_04503;P0470A12.11	1.22993	0.373901	up	1.29857	1	2367700	0	0	0	0	0	1.89572	1	1	1	1	1
271	B9EVI4;B8A842;A0A0E0FXG2;Q5N7X7	B9EVI4;B8A842;A0A0E0FXG2;Q5N7X7	Protein arginine methyltransferase NDUFAF7;Protein arginine methyltransferase NDUFAF7;Protein arginine methyltransferase NDUFAF7;Protein arginine methyltransferase NDUFAF7	Os01g0911900 OsJ_04506 OSNPB_010911900;OsI_04882;P0470A12.18	1.98368	0.373901	up	1.98818	1	7982900	0	0	0	0	0	3.96454	1	1	1	1	1
272	Q8S091;A2WY84;A0A0E0FXH0	Q8S091;A2WY84;A0A0E0FXH0	Thioredoxin F, chloroplastic;Uncharacterized protein;Uncharacterized protein	Os01g0913000 LOC_Os01g68480 OsJ_04513 P0470A12.34;OsI_04888	8.77907	2.91781e-07	up	4.13407	1	13601000	16700000	27751000	0	0	0	4.07015	4.10738	4.22467	1	1	1
274	A0A0E0FXL2;A0A0E0FXL3;A0A0E0FXL5;A0A0E0FXL4;B8A859;A0A0E0FXL6;B9EVV4;A0A0P0VC44;Q0JGL7;Q5JLC8	A0A0E0FXL2;A0A0E0FXL3;A0A0E0FXL5;A0A0E0FXL4;B8A859;A0A0E0FXL6;B9EVV4;A0A0P0VC44;Q0JGL7;Q5JLC8	Uncharacterized protein;Uncharacterized protein;Uncharacterized protein;Uncharacterized protein;Uncharacterized protein;Uncharacterized protein;Uncharacterized protein;Os01g0916800 protein;Os01g0916800 protein;Putative THO complex 2	Os01g0916800;Os01g0916800 OSNPB_010916800;OsI_04921;OsJ_04544;P0413C03.13	2.08234	0.373901	up	2.05821	1	0	0	22164000	0	0	0	1	1	4.17463	1	1	1
276	A2WYG5;A0A0P0VC79;B9EVX4;A0A0E0FXQ5;Q0JGI9	A2WYG5;A0A0P0VC79;B9EVX4;A0A0E0FXQ5;Q0JGI9	Uncharacterized protein;Os01g0921200 protein;Uncharacterized protein;Uncharacterized protein;Os01g0921200 protein	Os01g0921200;Os01g0921200 OSNPB_010921200;OsI_04968;OsJ_04577	2.07659	0.373901	up	2.05421	1	0	21896000	0	0	0	0	1	4.16264	1	1	1	1
277	Q7F225;A2YHF9;A0A0E0FXS9;A3BFV7	Q7F225;A2YHF9;A0A0E0FXS9;A3BFV7	Os07g0109500 protein;Uncharacterized protein;Uncharacterized protein;Uncharacterized protein	OJ1567_G09.119 P0585H11.134 Os07g0109500 OSNPB_070109500;OsI_24624;OsJ_22825	5.33461	0.354696	up	5.52521	3.10982	17864000	29758000	35181000	0	0	12140000	4.13334	5.12725	7.31503	1	1	7.32947
279	Q10A80;B8AP72;Q10A81;Q7Y1D0;A0A0E0FXZ8;Q10A79	Q10A80;B8AP72;Q10A81;Q7Y1D0;A0A0E0FXZ8;Q10A79	Expressed protein;Uncharacterized protein;Expressed protein;Uncharacterized protein OSJNBa0033P04.10;Uncharacterized protein;Expressed protein	LOC_Os03g64400;Os03g0862100 LOC_Os03g64400 Os03g0862100 OSNPB_030862100;OsI_14447;OSJNBa0033P04.10	19.7504	0.116168	up	5.30381	1	49626000	0	39578000	0	0	0	7.52931	1	7.38212	1	1	1
283	A3A121;A2WYI2;A0A0E0FY52	A3A121;A2WYI2;A0A0E0FY52	Uncharacterized protein;Uncharacterized protein;Uncharacterized protein	OsI_04983;OsJ_04591	2.177	0.651988	up	6.25514	5.1328	33838000	27127000	32604000	0	8769500	8062300	7.29489	4.20662	7.26391	1	7.16884	7.22957
285	Q5JKH1;B8A8G2;A0A0E0FY68	Q5JKH1;B8A8G2;A0A0E0FY68	Os01g0924900 protein;Uncharacterized protein;Uncharacterized protein	Os01g0924900 B1033B05.16 OSNPB_010924900;OsI_04995	7.47717	2.93609e-07	up	3.90249	1	9003100	4942800	5828300	0	0	0	3.98518	3.83954	3.88275	1	1	1
286	B9EVZ1;Q8RUL6;A0A0E0FY74;A0A0E0FY73	B9EVZ1;Q8RUL6;A0A0E0FY74;A0A0E0FY73	Uncharacterized protein;Enoyl CoA hydratase-like protein;Uncharacterized protein;Uncharacterized protein	OsJ_04606;P0482D04.4 Os01g0925200 B1033B05.26 OSNPB_010925200	50.0626	0.00141395	up	6.64566	1	37472000	30505000	38429000	0	0	0	7.36109	5.20959	7.3663	1	1	1
287	Q8RUU5;B8ABQ7;A0A0E0FY75;Q5JK16;A3A136	Q8RUU5;B8ABQ7;A0A0E0FY75;Q5JK16;A3A136	S-acyltransferase;S-acyltransferase;S-acyltransferase;S-acyltransferase;S-acyltransferase	Os01g0925300 Os01g0925300 B1033B05.27 OSJNBa0093F16.1 OSNPB_010925300;OsI_05001;OsJ_04607;P0482D04.5	2.04386	0.373901	up	2.0313	1	0	15806000	0	0	0	0	1	4.09389	1	1	1	1
289	Q0JGD3;Q5JK31;A0A0E0FYB6;B9EW08;B8A8R7;A0A0E0FYB5	Q0JGD3;Q5JK31;A0A0E0FYB6;B9EW08;B8A8R7;A0A0E0FYB5	Os01g0929100 protein (Fragment);Os01g0929100 protein;Uncharacterized protein;Uncharacterized protein;Uncharacterized protein;Uncharacterized protein	Os01g0929100 Os01g0929100 OSNPB_010929100;Os01g0929100 OSJNBa0052O12.18-1 OSNPB_010929100;OsI_05039;OsJ_04636	1.95328	0.373901	up	1.9659	1	5997500	0	0	0	0	0	3.89769	1	1	1	1	1
290	A2WYS0;A0A0E0FYE9;A0A0E0FYE8;Q8LR61	A2WYS0;A0A0E0FYE9;A0A0E0FYE8;Q8LR61	Uncharacterized protein;Uncharacterized protein;Uncharacterized protein;Os01g0934000 protein	Os01g0934000 Os01g0934000 OsJ_04665 OSNPB_010934000 P0423A12.30;OsI_05078	1.99532	0.373901	up	1.99662	1	0	0	9630000	0	0	0	1	1	3.98987	1	1	1
291	Q5JMQ9;B8A8T3;A0A0E0FYF1	Q5JMQ9;B8A8T3;A0A0E0FYF1	Os01g0934200 protein;Uncharacterized protein;Uncharacterized protein	Os01g0934200 Os01g0934200 OsJ_04667 OSNPB_010934200 P0423A12.32 P0492G09.2;OsI_05080	1.52738	0.373901	up	1.61106	1	3497000	0	0	0	0	0	2.83318	1	1	1	1	1
292	Q0JGA3;A3A196;A2WYS4;A0A0E0FYF3	Q0JGA3;A3A196;A2WYS4;A0A0E0FYF3	Os01g0934400 protein (Fragment);Uncharacterized protein;Uncharacterized protein;Uncharacterized protein	Os01g0934400 Os01g0934400 OSNPB_010934400;OsI_05082;OsJ_04669	3.92725	0.116261	up	2.97352	1	10759000	6671700	0	0	0	0	4.01678	3.90378	1	1	1	1
293	Q942X6;B8A8T9;A0A0E0FYH0;B7ELQ3	Q942X6;B8A8T9;A0A0E0FYH0	Os01g0935700 protein;Uncharacterized protein;Uncharacterized protein	Os01g0935700 OSNPB_010935700;OsI_05097;P0492G09.27-1 Os01g0935700 OsJ_04682 OSNPB_010935700	90.5512	2.25655e-08	up	7.50066	1	42245000	59776000	46748000	0	0	0	7.43159	7.59999	7.4704	1	1	1
294	Q942X4;B9EW29;B8A8U0;A0A0E0FYH2	Q942X4;B9EW29;B8A8U0;A0A0E0FYH2	Succinate dehydrogenase subunit 4, mitochondrial;Uncharacterized protein;Uncharacterized protein;Uncharacterized protein	OsI_05099;OsJ_04684;SDH4 Os01g0935900 LOC_Os01g70980 P0492G09.31	124.758	2.01466e-08	up	7.96298	1	141710000	126730000	102730000	0	0	0	8.0565	7.95948	7.87297	1	1	1
295	Q8S1U9;B8A8V3;A0A0E0FYI5;A0A0E0FYI4;B9EW35	Q8S1U9;B8A8V3;A0A0E0FYI5;A0A0E0FYI4;B9EW35	Os01g0937200 protein;Uncharacterized protein;Uncharacterized protein;Uncharacterized protein;Uncharacterized protein	Os01g0937200 OSNPB_010937200 P0504E02.11;OsI_05112;OsJ_04697	2.0425	0.373901	up	2.03033	1	0	0	15061000	0	0	0	1	1	4.091	1	1	1
296	Q8RUQ6;B8A972;A0A0E0FYJ7	Q8RUQ6;B8A972;A0A0E0FYJ7	Os01g0938200 protein;Uncharacterized protein;Uncharacterized protein	Os01g0938200 B1150F11.1 OsJ_04706 OSNPB_010938200 P0504E02.25;OsI_05123	2.04357	0.373901	up	2.03109	1	15048000	0	0	0	0	0	4.09328	1	1	1	1	1
298	A3A1E1;A0A0E0FYL0;A2WYX1;Q5JLP6;A0A0E0FYK9	A3A1E1;A0A0E0FYL0;A2WYX1;Q5JLP6;A0A0E0FYK9	Uncharacterized protein;Uncharacterized protein;Uncharacterized protein;S-formylglutathione hydrolase;S-formylglutathione hydrolase	B1150F11.18-1 Os01g0939700 OSNPB_010939700;OsI_05135;OsJ_04718	8.47857	6.50333e-08	up	4.08382	1	11162000	18566000	15643000	0	0	0	4.02303	4.12834	4.10009	1	1	1
300	Q9LDN2;Q7FZ76;B8A971;A0A0E0FYU2	Q9LDN2;Q7FZ76;B8A971;A0A0E0FYU2	Uridine 5-monophosphate synthase;UMP synthase;Uncharacterized protein;Uncharacterized protein	OsI_05215;UMPS1;UMPS1 Os01g0951200 LOC_Os01g72240 B1147A04.37 OsJ_04774	8.26241	1.16819e-09	up	4.04656	1	12836000	11358000	12935000	0	0	0	4.05669	4.02385	4.05915	1	1	1
302	Q941Z0;A2WZ68;A0A0E0FYW4;A0A0E0FYW3	Q941Z0;A2WZ68;A0A0E0FYW4;A0A0E0FYW3	Probable NADPH:quinone oxidoreductase 1;Uncharacterized protein;Uncharacterized protein;Uncharacterized protein	Os01g0953600 LOC_Os01g72430 OsJ_04792 P0431G06.26-1;OsI_05238	4.07828	0.116152	up	3.02796	1	13637000	0	10447000	0	0	0	4.07083	1	4.01305	1	1	1
303	A0A0E0FYW8;Q7XAL6;B8B5H7;A0A0E0FYW7	A0A0E0FYW8;Q7XAL6;B8B5H7;A0A0E0FYW7	Uncharacterized protein;Os07g0409100 protein;Uncharacterized protein;Uncharacterized protein	OsI_25718;P0492E07.115 Os07g0409100 OsJ_23930 OSNPB_070409100	133.987	3.58598e-08	up	8.06594	1	170190000	123870000	169770000	0	0	0	8.13864	7.94231	8.11688	1	1	1
306	Q0JFW3;Q5JK67;B8A9J0;A0A0E0FZ20	Q0JFW3;Q5JK67;B8A9J0;A0A0E0FZ20	Os01g0958100 protein (Fragment);Os01g0958100 protein;Uncharacterized protein;Uncharacterized protein	OJ1294_F06.26-1 Os01g0958100 OsJ_04826 OSNPB_010958100;Os01g0958100;OsI_05275	8.56498	2.89014e-08	up	4.09845	1	18837000	14959000	13326000	0	0	0	4.14941	4.08018	4.06576	1	1	1
310	A0A0E0FZ84;Q94DM7;A2WZD5	A0A0E0FZ84;Q94DM7;A2WZD5	Uncharacterized protein;Os01g0962600 protein;Uncharacterized protein	Os01g0962600 OsJ_04856 OSNPB_010962600 P0483G10.27;OsI_05313	53.7203	0.0140927	up	6.7474	1	9149800	155470000	199760000	0	0	0	3.98836	8.05988	8.19395	1	1	1
311	A3A1U5;Q0JFS3;A2WZF2;A0A0E0FZA4;Q5JJW1	A3A1U5;Q0JFS3;A2WZF2;A0A0E0FZA4;Q5JJW1	Uncharacterized protein;Os01g0964900 protein;Uncharacterized protein;Uncharacterized protein;Mitochondrial carrier protein-like	Os01g0964900;OsI_05330;OsJ_04873;P0458E05.12 Os01g0964900 OSNPB_010964900	4.06643	0.116267	up	3.02376	1	15154000	0	9176400	0	0	0	4.09473	1	3.97655	1	1	1
312	B9EWM5;B8A9Y5;Q5JJV5;A0A0E0FZB7	B9EWM5;B8A9Y5;Q5JJV5;A0A0E0FZB7	Uncharacterized protein;Uncharacterized protein;Putative ABC transporter;Uncharacterized protein	OsI_05340;OsJ_04883;P0458E05.27	7.88362	2.88811e-08	up	3.97886	1	7108700	11375000	9105200	0	0	0	3.93879	4.02425	3.97354	1	1	1
313	Q94DH6;A2WZK1;A0A0E0FZI1	Q94DH6;A2WZK1;A0A0E0FZI1	Os01g0971500 protein;Cytochrome b5;Uncharacterized protein	Os01g0971500 Os01g0971500 OsJ_04923 OSNPB_010971500 P0518C01.12;OsI_05385	1.96251	0.373901	up	1.9727	1	6554700	0	0	0	0	0	3.91809	1	1	1	1	1
314	Q5JL23;A2WZM3;A0A0E0FZK4	Q5JL23;A2WZM3;A0A0E0FZK4	ABC-type transport system-like;Uncharacterized protein;Uncharacterized protein	Os01g0974000 OsJ_04947 OSNPB_010974000 P0459B04.5 P0698H10.29;OsI_05413	1.05302	0.372011	up	7.73535	7.66082	92499000	84117000	65635000	37066000	34725000	22506000	7.80768	7.75713	7.64125	7.74055	7.68783	7.55407
315	A0A0E0FZM4;A0A0E0FZM1;A0A0E0FZM0;A0A0E0FZL9	A0A0E0FZM4;A0A0E0FZM1;A0A0E0FZM0;A0A0E0FZL9	Uncharacterized protein;Uncharacterized protein;Uncharacterized protein;Uncharacterized protein		173.409	1.23218e-11	up	8.43803	1	361850000	354430000	329530000	0	0	0	8.43593	8.4544	8.42377	1	1	1
316	A0A0E0FZP6;Q5JNB0;A0A0E0FZP7;B8AA84	A0A0E0FZP6;Q5JNB0;A0A0E0FZP7;B8AA84	Cysteine synthase;Cysteine synthase;Cysteine synthase;Uncharacterized protein	Os01g0978100 OsJ_04976 OSNPB_010978100 P0020E09.29;OsI_05444	112.179	4.26291e-09	up	7.80966	1	85863000	89666000	104010000	0	0	0	7.76205	7.78865	7.87828	1	1	1
317	A0A0E0FZR3;A0A0E0FZR2;Q6YU98;B8AGU5	A0A0E0FZR3;A0A0E0FZR2;Q6YU98;B8AGU5	Uncharacterized protein;Uncharacterized protein;Os02g0100700 protein;Uncharacterized protein	Os02g0100700 B1370C05.8 OsJ_04982 OSNPB_020100700;OsI_05449	7.49517	2.9873e-06	up	3.90596	1	7119300	3523400	10652000	0	0	0	3.94084	3.75811	4.01892	1	1	1
318	A0A0E0FZS1;Q6YU95;B8AGU7	A0A0E0FZS1;Q6YU95;B8AGU7	Uncharacterized protein;Os02g0101100 protein;Uncharacterized protein	Os02g0101100 Os02g0101100 B1370C05.12 OJ1435_F07.2 OsJ_04988 OSNPB_020101100;OsI_05453	4.15923	0.116117	up	3.05631	1	0	14949000	14871000	0	0	0	1	4.07995	4.08899	1	1	1
319	A0A0E0FZS6;A0A0E0FZS5;A0A0E0FZS7;Q6YU90;B8AGU8	A0A0E0FZS6;A0A0E0FZS5;A0A0E0FZS7;Q6YU90;B8AGU8	Uncharacterized protein;Uncharacterized protein;Uncharacterized protein;Os02g0101500 protein;Uncharacterized protein	B1370C05.18-1 Os02g0101500 OJ1435_F07.8-1 OsJ_04992 OSNPB_020101500;OsI_05455	1.03191	0.692302	up	9.30146	9.25615	2895400000	2129800000	2443100000	944730000	2046300000	1566300000	9.34223	9.2625	9.29964	9.05835	9.41045	9.29964
320	Q0E4T3;A3A253;A2WZR6;Q6YU89;A0A0E0FZT1;A0A0E0FZT0;A0A0P0VDJ6;Q60EQ3;Q0DHI3;B9FKM6;B8AZ12;A0A0E0HFN9	Q0E4T3;A3A253;A2WZR6;Q6YU89;A0A0E0FZT1;A0A0E0FZT0;A0A0P0VDJ6	Os02g0101700 protein (Fragment);Uncharacterized protein;Uncharacterized protein;Putative HECT ubiquitin-protein ligase 3;Uncharacterized protein;Uncharacterized protein;Os02g0101700 protein (Fragment)	B1370C05.20 OJ1435_F07.10;OJ1280_A04.10;Os02g0101700 Os02g0101700 OSNPB_020101700;Os02g0101700 OSNPB_020101700;Os05g0463900 Os05g0463900 OSNPB_050463900;OsI_05457;OsI_20254;OsJ_04994;OsJ_18837	8.89098	4.93945e-08	up	4.15234	1	17474000	17697000	26132000	0	0	0	4.12569	4.11906	4.21228	1	1	1
323	Q6ETD9;A2WZU7;A0A0E0FZW5	Q6ETD9;A2WZU7;A0A0E0FZW5	Calmodulin-binding protein-like;Uncharacterized protein;Uncharacterized protein	Os02g0105500 Os02g0105500 OJ1359_D06.7 OsJ_05024 OSNPB_020105500;OsI_05490	4.52751	0.373901	up	3.17872	1	50318000	0	0	0	0	0	7.53615	1	1	1	1	1
324	A0A0E0FZY4;Q6ETC8;B8AGX3	A0A0E0FZY4;Q6ETC8;B8AGX3	Uncharacterized protein;Os02g0106800 protein;Uncharacterized protein	Os02g0106800 Os02g0106800 OJ1359_D06.29 OsJ_05033 OSNPB_020106800;OsI_05499	28.2175	0.116117	up	5.81852	1	218520000	218750000	0	0	0	0	8.23051	8.22505	1	1	1	1
325	A2WZV9;A0A0E0FZY6;B9F1R2	A2WZV9;A0A0E0FZY6;B9F1R2	Uncharacterized protein;Uncharacterized protein;Uncharacterized protein	OsI_05501;OsJ_05035	2.33612	0.116126	up	2.22411	1	3404900	3058700	0	0	0	0	2.8272	2.84513	1	1	1	1
326	A0A0E0G002;Q6Z8Z5;B8AGJ7	A0A0E0G002;Q6Z8Z5;B8AGJ7	Uncharacterized protein;Os02g0110400 protein;Uncharacterized protein	Os02g0110400 Os02g0110400 OsJ_05062 OSNPB_020110400 P0501G04.11;OsI_05540	8.47337	2.226e-09	up	4.08294	1	13329000	14570000	16564000	0	0	0	4.06547	4.07376	4.10957	1	1	1
327	P52712;P37891;A2X026;A0A0E0G033;Q0D6H5;A2YL94;A0A0E0I0Q4	P52712;P37891;A2X026;A0A0E0G033;Q0D6H5;A2YL94;A0A0E0I0Q4	Serine carboxypeptidase-like;Serine carboxypeptidase 3;Carboxypeptidase;Carboxypeptidase;Carboxypeptidase;Carboxypeptidase;Carboxypeptidase	CBP3 Os02g0114200 LOC_Os02g02320 OJ1399_H05.34 OsJ_05092 P0036E06.13;CBP31 Os07g0479300 LOC_Os07g29620 P0434A03.108-1 P0640E12.147-1;Os07g0479300 Os07g0479300 OsJ_24236 OSNPB_070479300;OsI_05564;OsI_25989	9.58634	0.161277	up	4.26098	1	0	26449000	59390000	0	0	0	1	4.20133	7.58161	1	1	1
328	A0A0P0VDU4;Q6Z7C0;A2X029;A0A0E0G034;A3A2E5	A0A0P0VDU4;Q6Z7C0;A2X029;A0A0E0G034;A3A2E5	Os02g0114400 protein;Os02g0114400 protein;Uncharacterized protein;Uncharacterized protein;Uncharacterized protein	Os02g0114400 OJ1399_H05.36 P0036E06.15;Os02g0114400 OSNPB_020114400;OsI_05566;OsJ_05094	1.86177	0.373901	up	1.89668	1	0	3360200	0	0	0	0	1	3.69003	1	1	1	1
329	A0A0E0G085;Q6YUT2;A2X070;A0A0E0G086	A0A0E0G085;Q6YUT2;A2X070;A0A0E0G086	Uncharacterized protein;Os02g0119400 protein;Uncharacterized protein;Uncharacterized protein	Os02g0119400 OJ1217_F02.19 OsJ_05145 OSJNBb0088N06.3 OSNPB_020119400;OsI_05611	2.03135	0.373901	up	2.02244	1	0	14022000	0	0	0	0	1	4.06731	1	1	1	1
330	B8AGK7;A0A0E0G0A5;Q6YUS0	B8AGK7;A0A0E0G0A5;Q6YUS0	Uncharacterized protein;Uncharacterized protein;Os02g0121000 protein	Os02g0121000 OJ1020_C02.10 OsJ_05163 OSJNBb0088N06.19 OSNPB_020121000;OsI_05632	5.49628	0.00146844	up	3.45846	1	4335600	2698400	3171900	0	0	0	3.75567	2.8272	3.7925	1	1	1
332	C7IYB6;Q6Z728;B8AH19;B9F268;A0A0E0G0C5	C7IYB6;Q6Z728;B8AH19;B9F268;A0A0E0G0C5	Os02g0122500 protein;Os02g0122500 protein;Uncharacterized protein;Uncharacterized protein;Uncharacterized protein	Os02g0122500;OsI_05647;OsJ_05179;P0575F10.3 Os02g0122500 OSNPB_020122500	159.348	5.74143e-07	up	8.31604	1	228340000	438040000	176980000	0	0	0	8.24467	8.56597	8.13748	1	1	1
333	B9FVA9;Q6Z720;B9F272;Q84LG6;A0A0E0HW83;A0A0E0G0D5;Q0E4E1;B8AGX9;B8B6V6	B9FVA9;Q6Z720;B9F272;Q84LG6;A0A0E0HW83;A0A0E0G0D5;Q0E4E1;B8AGX9	Eukaryotic translation initiation factor 3 subunit C;Eukaryotic translation initiation factor 3 subunit C;Eukaryotic translation initiation factor 3 subunit C;Eukaryotic translation initiation factor 3 subunit C;Eukaryotic translation initiation factor 3 s	Os02g0123300;OsI_05653;OsI_24739;OsJ_05186;OsJ_22945;P0474G09.113 Os07g0124500 OSNPB_070124500;P0575F10.12	79.0708	1.30648e-07	up	7.30507	1	30208000	36726000	43452000	0	0	0	7.16697	7.31666	7.43159	1	1	1
335	Q6Z702;B8AGY8;A0A0E0G0F5	Q6Z702;B8AGY8;A0A0E0G0F5	Os02g0125100 protein;Uncharacterized protein;Uncharacterized protein	Os02g0125100 OsJ_05201 OSNPB_020125100 P0575F10.36;OsI_05669	21.5755	0.116117	up	5.43132	1	0	67346000	66441000	0	0	0	1	7.64459	7.64938	1	1	1
336	Q6Z2M6;A6N1E3;A2X0E2;A0A0E0G0H5;A0A0E0G0H4	Q6Z2M6;A6N1E3;A2X0E2;A0A0E0G0H5;A0A0E0G0H4	Os02g0126600 protein;Uncharacterized protein;Uncharacterized protein;Uncharacterized protein;Uncharacterized protein	Os02g0126600 OsJ_05213 OSNPB_020126600 P0482F12.17;OsI_05680	1.96332	0.373901	up	1.97329	1	0	7219900	0	0	0	0	1	3.91988	1	1	1	1
338	A0A0P0VEH6;B9F289;B8AGZ8;A0A0E0G0I8;A0A0E0G0I7;Q6Z2L5	A0A0P0VEH6;B9F289;B8AGZ8;A0A0E0G0I8;A0A0E0G0I7;Q6Z2L5	Os02g0127700 protein;Uncharacterized protein;Uncharacterized protein;Uncharacterized protein;Uncharacterized protein;Ribose-phosphate pyrophosphokinase 1, chloroplastic	Os02g0127700 LOC_Os02g03540 P0482F12.28-1 P0482F12.28-2 P0576F08.1-1 P0576F08.1-2;Os02g0127700 OSNPB_020127700;OsI_05689;OsJ_05220	2.33444	0.214932	up	2.22308	1	1459700	0	3634400	0	0	0	1.86071	1	3.80852	1	1	1
339	Q6Z6Y2;A2X0H7;A0A0E0G0L1	Q6Z6Y2;A2X0H7;A0A0E0G0L1	Os02g0130000 protein;Uncharacterized protein;Uncharacterized protein	Os02g0130000 OJ1007_D04.1 OsJ_05241 OSNPB_020130000 P0576F08.32;OsI_05714	8.90303	0.15536	up	4.1543	1	32173000	27805000	0	0	0	0	7.24983	4.21306	1	1	1	1
340	Q6ZG90;A2X0J1;A0A0E0G0M6	Q6ZG90;A2X0J1;A0A0E0G0M6	ATP synthase;Uncharacterized protein;Uncharacterized protein	Os02g0131300 Os02g0131300 OJ1007_D04.18 OsJ_05252 OSNPB_020131300;OsI_05726	128.615	7.82399e-09	up	8.00691	1	115890000	147660000	151690000	0	0	0	7.9227	8.04902	8.04902	1	1	1
341	P52428;B8AHG2;A0A0E0G0Q8	P52428;B8AHG2;A0A0E0G0Q8	Proteasome subunit alpha type-1;Proteasome subunit alpha type;Proteasome subunit alpha type	OsI_05746;PAF1 Os02g0133800 LOC_Os02g04100 OsJ_05275 P0030G11.18 P0585B01.3	3.85376	0.116117	up	2.94626	1	6539300	7262700	0	0	0	0	3.91769	3.92111	1	1	1	1
342	Q6YXY7;Q0E448;B9F2M0;A0A0E0G0U6;A0A0E0G0U7;A0A0E0G0U3;A0A0E0G0U4	Q6YXY7;Q0E448;B9F2M0;A0A0E0G0U6;A0A0E0G0U7;A0A0E0G0U3;A0A0E0G0U4	Putative WD repeat domain 11;Os02g0137000 protein (Fragment);Uncharacterized protein;Uncharacterized protein;Uncharacterized protein;Uncharacterized protein;Uncharacterized protein	Os02g0137000 Os02g0137000 OSNPB_020137000;OsJ_05300;OSJNBa0026E05.2 OSJNBa0081C13.26	3.90346	0.116233	up	2.96475	1	0	6530900	9945600	0	0	0	1	3.89677	3.9975	1	1	1
345	Q6YXW6;A0A0E0G126;B8AHF9;B9F2N9;A0A0E0G125	Q6YXW6;A0A0E0G126;B8AHF9;B9F2N9;A0A0E0G125	Sucrose-phosphatase 2;Uncharacterized protein;Uncharacterized protein;Uncharacterized protein;Uncharacterized protein	OsI_05817;OsJ_05345;SPP2 Os02g0143100 LOC_Os02g05030 OsJ_005195 OSJNBa0064G16.2	1.95574	0.373901	up	1.96772	1	6125600	0	0	0	0	0	3.90315	1	1	1	1	1
346	P0C522;P0C521;P0C520;D3DF43;A0A0E0G138;Q67TM4;B9ETG1;Q35316;Q2F981;H5ZXF6;Q8HCP8;Q2QSM1	P0C522;P0C521;P0C520;D3DF43;A0A0E0G138;Q67TM4	ATP synthase subunit alpha, mitochondrial;ATP synthase subunit alpha, mitochondrial;ATP synthase subunit alpha, mitochondrial;ATP synthase subunit alpha;ATP synthase subunit alpha;ATP synthase subunit alpha	atp1 atp1-1 atp1-2;ATPA;LOC_Os12g23630 OsJ_35906;OsJ_00606;P0681H07.43;rps2	1.39819	0.0032544	up	10.0452	9.56165	13833000000	15603000000	14490000000	2495000000	4346800000	2234400000	10.0452	10.0452	10.0452	9.51909	9.71078	9.45508
348	A0A0E0G163;B9F2Q3;Q6Z2Z3;B8AHQ9;A0A0P0VEQ0;Q5Z854;A0A0E0HK63;A0A0E0HK61;A0A0E0HUX1;A0A0E0HK60;B9FQQ6;A2YGN8;Q8W3N6;A0A0E0HUX3;A0A0E0HUX2;A0A0E0HK64;Q6K2Q1;B8BEG9;B9G2X0	A0A0E0G163;B9F2Q3;Q6Z2Z3;B8AHQ9;A0A0P0VEQ0;Q5Z854;A0A0E0HK63;A0A0E0HK61;A0A0E0HUX1;A0A0E0HK60;B9FQQ6;A2YGN8	26S proteasome non-ATPase regulatory subunit 2 homolog;26S proteasome non-ATPase regulatory subunit 2 homolog;26S proteasome non-ATPase regulatory subunit 2 homolog;26S proteasome non-ATPase regulatory subunit 2 homolog;Os02g0146700 protein (Fragment);26S	Os02g0146700 Os02g0146700 OJ1008_C03.11 OSNPB_020146700;Os02g0146700 OSNPB_020146700;Os06g0699900 OsJ_22525 OSNPB_060699900;Os09g0326800 Os09g0326800 OSNPB_090326800 P0692F07.34 P0706E03.1;OsI_05840;OsI_24349;OsI_30901;OsJ_05368;OsJ_28885;OsRPN1b Os06g0699900;P0468G03.16	14.4743	0.00423097	up	4.85542	1	25599000	24578000	29487000	0	0	0	4.21046	4.18478	6.17103	1	1	1
350	Q0E3P3;A0A0E0G1N1;A3A3E7;A2X175	Q0E3P3;A0A0E0G1N1;A3A3E7;A2X175	Os02g0162000 protein;Uncharacterized protein;Uncharacterized protein;Uncharacterized protein	Os02g0162000 Os02g0162000 OSNPB_020162000;OsI_05956;OsJ_05482	8.58675	1.2351e-08	up	4.10211	1	18267000	16016000	13541000	0	0	0	4.14076	4.09658	4.06901	1	1	1
351	A0A0E0G1Q7;A0A0E0G1Q8;Q10L71;Q10L72;A0A0E0G1Q4;Q10L70;B8APU2;A3AI33;A0A0E0G1Q5;A0A0P0VYG1;Q8W189	A0A0E0G1Q7;A0A0E0G1Q8;Q10L71;Q10L72;A0A0E0G1Q4;Q10L70;B8APU2;A3AI33;A0A0E0G1Q5	Uncharacterized protein;Uncharacterized protein;Villin-2;Villin-3, putative, expressed;Uncharacterized protein;Villin-3, putative, expressed;Uncharacterized protein;Uncharacterized protein;Uncharacterized protein	LOC_Os03g24220;Os03g0356700 OSNPB_030356700;OsI_11627;OsJ_10899;VLN2 LOC_Os03g24220 Os03g0356700 OSNPB_030356700	142.984	3.35786e-12	up	8.15971	1	176410000	187180000	188770000	0	0	0	8.1579	8.15001	8.17123	1	1	1
353	A0A0E0G1V5;A0A0E0G1V4;Q6H4V4;B8AIH4;B8AII5	A0A0E0G1V5;A0A0E0G1V4;Q6H4V4;B8AIH4	Uncharacterized protein;Uncharacterized protein;Os02g0167700 protein;Uncharacterized protein	Os02g0167700 Os02g0167700 OsJ_05528 OSJNBa0085K21.46 OSNPB_020167700;OsI_06001;OsI_06019	42.1483	0.00780851	up	6.3974	1	26035000	46883000	51405000	0	0	0	4.21306	7.46509	7.51405	1	1	1
354	Q6H6D2;B8AII1;A0A0E0G1X1;A0A0P0VFC8;A0A0E0G1X0	Q6H6D2;B8AII1;A0A0E0G1X1;A0A0P0VFC8;A0A0E0G1X0	Porphobilinogen deaminase, chloroplastic;Uncharacterized protein;Uncharacterized protein;Os02g0168800 protein (Fragment);Uncharacterized protein	HEMC Os02g0168800 LOC_Os02g07230 OsJ_05540 P0669G09.15-1 P0669G09.15-2;Os02g0168800 OSNPB_020168800;OsI_06012	4.00327	0.116117	up	3.00118	1	9795700	10435000	0	0	0	0	4.00243	4.0011	1	1	1	1
355	Q10I20;A2XIN4;A0A0E0G1Y8;A0A0E0G1Y9	Q10I20;A2XIN4;A0A0E0G1Y8;A0A0E0G1Y9	Glycosyltransferase, putative, expressed;Uncharacterized protein;Uncharacterized protein;Uncharacterized protein	OsI_12297;OSJNBa0026A15.4 LOC_Os03g37010 Os03g0567600 OsJ_11476 OSNPB_030567600	2.08319	0.373901	up	2.05879	1	21571000	0	0	0	0	0	4.17638	1	1	1	1	1
356	Q6H712;A2X1E1;A0A0E0G202;B8B469;Q655Z1	Q6H712;A2X1E1;A0A0E0G202;B8B469;Q655Z1	Os02g0170200 protein;Uncharacterized protein;Uncharacterized protein;Uncharacterized protein;Epstein-Barr virus EBNA-1-like	Os02g0170200 OJ1116_A06.25 OsJ_05552 OSNPB_020170200 P0030G02.15;OsI_06023;OsI_23552;P0633E08.30	2.09344	0.373901	up	2.06587	1	0	0	24546000	0	0	0	1	1	4.19762	1	1	1
358	Q6EUQ9;B8AIK2;A0A0E0G252;A6MZM3	Q6EUQ9;B8AIK2;A0A0E0G252;A6MZM3	Os02g0175400 protein;Uncharacterized protein;Uncharacterized protein;Vacuolar ATP synthase (Fragment)	Os02g0175400 OJ1077_E05.10 OsJ_05583 OSNPB_020175400;OsI_06057	96.7515	6.98673e-08	up	7.59621	1	63370000	73358000	45937000	0	0	0	7.63731	7.6889	7.46242	1	1	1
360	Q6EUQ5;A2X1I4;A0A0E0G259	Q6EUQ5;A2X1I4;A0A0E0G259	Os02g0175800 protein;Uncharacterized protein;Uncharacterized protein	OJ1077_E05.15-1 Os02g0175800 OsJ_05587 OSNPB_020175800;OsI_06064	203.354	2.39964e-12	up	8.66785	1	603180000	550640000	563040000	0	0	0	8.67607	8.65594	8.67154	1	1	1
361	A2XDE9;Q10QM8;A0A0E0G276	A2XDE9;Q10QM8;A0A0E0G276	Uncharacterized protein;Mitochondrial carrier protein, expressed;Uncharacterized protein	Os03g0191100 LOC_Os03g09110 Os03g0191100 OsJ_09726 OSNPB_030191100;OsI_10333	2.07881	0.373901	up	2.05576	1	20710000	0	0	0	0	0	4.16728	1	1	1	1	1
362	Q8H7P4;A2XDC7;A0A0E0G2A2;Q10QQ4	Q8H7P4;A2XDC7;A0A0E0G2A2;Q10QQ4	FH protein interacting protein FIP1, putative, expressed;Uncharacterized protein;Uncharacterized protein;FH protein interacting protein FIP1, putative, expressed	LOC_Os03g08860;OJ1217B09.2 LOC_Os03g08860 Os03g0187600 OsJ_09706 OSNPB_030187600;OsI_10309	4.03761	0.116131	up	3.0135	1	11955000	10483000	0	0	0	0	4.03833	4.00217	1	1	1	1
365	A0A0P0VFI0;B9F3D7;Q69PA8;A2Z1F5;A0A0E0IJS9;A3BZ11;Q6ETL8;B8AIW3;A0A0E0G2H2	A0A0P0VFI0;B9F3D7;Q69PA8;A2Z1F5;A0A0E0IJS9;A3BZ11;Q6ETL8;B8AIW3;A0A0E0G2H2	Os02g0178800 protein (Fragment);Uncharacterized protein;Os09g0426800 protein;Uncharacterized protein;Uncharacterized protein;Uncharacterized protein;Os02g0178800 protein;Uncharacterized protein;Uncharacterized protein	Os02g0178800 Os02g0178800 OSNPB_020178800 P0544B02.10;Os02g0178800 OSNPB_020178800;Os09g0426800 OJ1299_A11.27 OSNPB_090426800;OsI_06088;OsI_31436;OsJ_05611;OsJ_29433	4.11818	0.11612	up	3.04201	1	13691000	0	12473000	0	0	0	4.07208	1	4.05394	1	1	1
367	A0A0E0G2M1;Q0E3C3;Q94LW4;B8B0R0;A0A0E0HU56;A0A0E0HU54;A0A0E0HU55;A0A0P0XEB4;B9G051;B8B9A9;B9FQ74;A3A3U6;A0A0E0ISF2;A0A0E0ISF3;A0A0E0ISF4;Q0J6N4	A0A0E0G2M1;Q0E3C3;Q94LW4;B8B0R0;A0A0E0HU56;A0A0E0HU54;A0A0E0HU55;A0A0P0XEB4;B9G051;B8B9A9;B9FQ74;A3A3U6;A0A0E0ISF2;A0A0E0ISF3;A0A0E0ISF4;Q0J6N4	Uncharacterized protein;Homeobox protein knotted-1-like 2;Homeobox protein knotted-1-like 11;Uncharacterized protein;Uncharacterized protein;Uncharacterized protein;Uncharacterized protein;Os08g0292900 protein (Fragment);Uncharacterized protein;Uncharacter	HOS58 Os02g0182800 LOC_Os02g08544;HOS59 Os06g0646600 LOC_Os06g43860 OJ1226_A12.18 OSJNBa0062J02.2;Os08g0292900 OSNPB_080292900;OSH45 Os08g0292900 LOC_Os08g19650 OJ1705_A03.8 OSJNBb0075O18.121;OsI_23897;OsI_28664;OsJ_05640;OsJ_22154;OsJ_26781	4.35574	0.395357	up	7.58537	5.46245	57192000	58848000	60002000	42362000	0	25370000	7.58285	7.58805	7.58522	7.77971	1	7.60765
369	B8AIY8;A0A0E0G2N8	B8AIY8;A0A0E0G2N8	Uncharacterized protein;Uncharacterized protein	OsI_06135	78.3215	1.13743e-09	up	7.29134	1	35240000	34126000	34180000	0	0	0	7.32704	7.24743	7.29954	1	1	1
371	Q8L438;Q0D4C6;B8AA26;A3BMJ9;A2YP15;A0A0E0G2Q1;A2ZU62;B8AQ84;A0A0P0X925;Q84TS3;A0A0E0H7Q7;Q10KS8;Q688D6;A2Y082;A0A0E0H950	Q8L438;Q0D4C6;B8AA26;A3BMJ9;A2YP15;A0A0E0G2Q1;A2ZU62;B8AQ84;A0A0P0X925;Q84TS3;A0A0E0H7Q7;Q10KS8;Q688D6;A2Y082;A0A0E0H950	Myb-like DNA-binding protein-like;Os07g0634900 protein;Uncharacterized protein;Uncharacterized protein;Uncharacterized protein;Uncharacterized protein;Uncharacterized protein;Uncharacterized protein;Os07g0634900 protein (Fragment);Putative Myb-like DNA-bin	myb16 Os05g0140100 OsJ_17058 OSJNBb0111O13.9 OSNPB_050140100;Os03g0371800 LOC_Os03g25550 OSNPB_030371800;Os07g0634900;Os07g0634900 OSNPB_070634900;OsI_02338;OsI_11755;OsI_18393;OsI_27004;OsJ_02147;OsJ_25267;OSJNBb0097F01.15;P0455H11.122 OJ1332_C12.106	2.00876	0.373901	up	2.00631	1	10901000	0	0	0	0	0	4.01892	1	1	1	1	1
372	A0A0E0G2V0;A0A0E0G2U9;B9F485;B8ADW8;B9F486;Q6H8D6;Q6H8D5;B8AE85;A0A0N7KEW9;A0A0P0VGA6;A0A0E0HKZ2;A0A0E0HKZ4;A0A0E0HKZ3;A2Y963;B9FRG1;Q5VQ78	A0A0E0G2V0;A0A0E0G2U9;B9F485;B8ADW8;B9F486;Q6H8D6;Q6H8D5;B8AE85;A0A0N7KEW9;A0A0P0VGA6;A0A0E0HKZ2;A0A0E0HKZ4;A0A0E0HKZ3;A2Y963;B9FRG1;Q5VQ78	Coatomer subunit beta;Coatomer subunit beta;Coatomer subunit beta;Coatomer subunit beta;Coatomer subunit beta;Putative coatomer subunit beta-3;Coatomer subunit beta-2;Coatomer subunit beta;Os02g0209100 protein (Fragment);Os02g0209000 protein (Fragm	Os02g0209000 LOC_Os02g11830 OJ1006_A02.22;Os02g0209000 OSNPB_020209000;Os02g0209100 LOC_Os02g11840 OJ1006_A02.24;Os02g0209100 OSNPB_020209100;Os06g0143900 LOC_Os06g05180 OSJNBa0007O20.8-1;OsI_06329;OsI_06330;OsI_21602;OsJ_05851;OsJ_05852;OsJ_20099	3.98671	0.116128	up	2.9952	1	8511500	0	10271000	0	0	0	3.97655	1	4.00904	1	1	1
373	B9F3Y2;Q6H8E4;A2X295;A0A0E0G2W7	B9F3Y2;Q6H8E4;A2X295;A0A0E0G2W7	ADP,ATP carrier protein;ADP,ATP carrier protein;ADP,ATP carrier protein;ADP,ATP carrier protein	Os02g0208100 OJ1003_F05.23 OJ1006_A02.6 OSNPB_020208100;OsI_06319;OsJ_05838	212.495	3.13839e-12	up	8.73129	1	667980000	674630000	669000000	0	0	0	8.72081	8.72964	8.74341	1	1	1
374	A3A4D6;A2X294;A0A0P0VG76;A0A0E0G2W8;Q0E2W9	A3A4D6;A2X294;A0A0P0VG76;A0A0E0G2W8;Q0E2W9	Uncharacterized protein;Uncharacterized protein;Os02g0207900 protein;Uncharacterized protein;Os02g0207900 protein (Fragment)	Os02g0207900;Os02g0207900 OSNPB_020207900;OsI_06318;OsJ_05837	4.10242	0.116253	up	3.03648	1	0	10289000	16771000	0	0	0	1	3.99815	4.11128	1	1	1
376	Q6ZIF9;A0A0E0G2Y8;B9F3R3;A2X1S4	Q6ZIF9;A0A0E0G2Y8;B9F3R3;A2X1S4	Cyclase-like protein 1;Uncharacterized protein;Uncharacterized protein;Uncharacterized protein	CYL1 Os02g0187100 LOC_Os02g09420 OJ1073_F05.22 OJ1115_B01.33;OsI_06152;OsJ_05673	22.8278	0.116188	up	5.51272	1	101740000	72397000	0	0	0	0	7.86001	7.67816	1	1	1	1
377	Q6YUU2;A0A0E0G350;Q0E373;A2X1V6;B9F3S8	Q6YUU2;A0A0E0G350;Q0E373;A2X1V6	Os02g0190600 protein;Uncharacterized protein;Os02g0190600 protein (Fragment);Uncharacterized protein	Os02g0190600;OsI_06183;OsJ_05700;OSJNBb0031B09.22 Os02g0190600 OSNPB_020190600	88.8865	2.60277e-10	up	7.47389	1	46007000	48892000	43868000	0	0	0	7.48744	7.4934	7.44084	1	1	1
378	Q7PC76;A0A0E0G368;A2X1Y0;A0A0P0VFW6;B9F3T4;A2X1X3	Q7PC76;A0A0E0G368;A2X1Y0;A0A0P0VFW6;B9F3T4;A2X1X3	Glucomannan 4-beta-mannosyltransferase 1;Uncharacterized protein;Uncharacterized protein;Os02g0192500 protein (Fragment);Uncharacterized protein;Uncharacterized protein	CSLA1 Os02g0192500 LOC_Os02g09930 P0437H03.110 P0453H10.31;Os02g0192500 OSNPB_020192500;OsI_06199;OsI_06205;OsJ_05716	7.80404	8.45583e-11	up	3.96422	1	8072700	8409200	9099300	0	0	0	3.96658	3.95331	3.97278	1	1	1
380	Q6H7M3;B8ADR7;A0A1B1ELU7;A0A0E0G3A4	Q6H7M3;B8ADR7;A0A1B1ELU7;A0A0E0G3A4	Copper-transporting ATPase HMA4;Uncharacterized protein;Heavy metal P1B-type ATPase;Uncharacterized protein	HMA4;HMA4 Os02g0196600 LOC_Os02g10290 OJ1225_F07.30 OJ1524_D08.15 OsJ_05752;OsI_06234	11.3691	0.000262122	up	4.50704	1	26540000	28705000	28080000	0	0	0	4.21565	4.22184	5.08365	1	1	1
382	A0A0P0VG21;A0A0N7KEV9;Q8W3N8;Q9FXT8;B8ADT3;A0A0E0G3D2;Q69Q32;C0J9X5;B8B4N6	A0A0P0VG21;A0A0N7KEV9;Q8W3N8;Q9FXT8;B8ADT3;A0A0E0G3D2;Q69Q32;C0J9X5;B8B4N6	Os02g0199900 protein;Os02g0199900 protein (Fragment);26S proteasome regulatory particle triple-A ATPase subunit4b (Fragment);26S proteasome regulatory particle triple-A ATPase subunit4;Uncharacterized protein;Uncharacterized protein;Os06g0607800 protein;26	Os02g0199900 OSNPB_020199900;Os06g0607800 Os06g0607800 OsJ_21925 OSNPB_060607800 P0029C06.33 P0556B08.9;OsI_06267;OsI_23654;OsRPT4 P0026H03.35-1 P0419A09.6-1 Os02g0199900 OsJ_05786 OSNPB_020199900;OsRPT4b	105.498	9.66687e-08	up	7.72107	1	89566000	91408000	58347000	0	0	0	7.78865	7.80469	7.56988	1	1	1
383	A0A0E0G3F5;A6N1Q5;Q69XJ9;A2YER6;A0A0E0HT74;Q6ZHU5;B8ADU1;A0A0E0G3F6;A2YER3;Q0E2Z3;A2WL83;Q94E63;A0A165TZX1;A0A0E0FGX5	A0A0E0G3F5;A6N1Q5;Q69XJ9;A2YER6;A0A0E0HT74;Q6ZHU5;B8ADU1;A0A0E0G3F6;A2YER3;Q0E2Z3;A2WL83;Q94E63;A0A165TZX1;A0A0E0FGX5	Uncharacterized protein;Uncharacterized protein (Fragment);Os06g0602600 protein;Uncharacterized protein;Uncharacterized protein;Uncharacterized protein;Uncharacterized protein;Uncharacterized protein;Uncharacterized protein;Os02g0202500 protein (Fragment);	Alba1;OJ1135_F06.5 OsJ_05802;Os01g0173100 OsJ_00565 OSJNBa0089K24.5 OSNPB_010173100;Os02g0202500 Os02g0202500 OSNPB_020202500;Os06g0602600 Os06g0602600 OsJ_21893 OSNPB_060602600 P0486H12.21;OsI_00594;OsI_06285;OsI_23607;OsI_23611	4.07832	0.556143	up	5.33126	3.30329	50020000	0	45535000	59767000	0	0	7.53407	1	7.45972	7.90987	1	1
384	Q69X47;B8B4C0;A0A0E0HT60;Q9FEB6;Q7GCH3;A2X279;A0A0E0G3I9	Q69X47;B8B4C0;A0A0E0HT60;Q9FEB6;Q7GCH3;A2X279;A0A0E0G3I9	Os06g0600100 protein;Uncharacterized protein;Uncharacterized protein;26S proteasome ATPase subunit Rpt6;26S proteasome regulatory particle triple-A ATPase subunit6;Uncharacterized protein;Uncharacterized protein	Os06g0600100 OsJ_21883 OSNPB_060600100 P0457B11.5 P0642B07.69;OsI_06305;OsI_23597;OsRpt6;OsRPT6 Os02g0205300 OsJ_05824 OSJNBb0056C19.22 OSNPB_020205300 P0544H11.38	143.367	2.52934e-09	up	8.16357	1	194980000	205940000	165660000	0	0	0	8.18661	8.20461	8.09948	1	1	1
385	A0A0P0VGR3;A2X2N8;Q6H536;A0A0E0G3U3;A3A4S7;A0A0E0G3U4	A0A0P0VGR3;A2X2N8;Q6H536;A0A0E0G3U3;A3A4S7;A0A0E0G3U4	Os02g0229400 protein (Fragment);Uncharacterized protein;Os02g0229400 protein;Uncharacterized protein;Uncharacterized protein;Uncharacterized protein	Os02g0229400 Os02g0229400 OSJNBb0035N08.17 OSNPB_020229400;Os02g0229400 OSNPB_020229400;OsI_06450;OsJ_05971	2.08202	0.639135	up	4.14653	3.08855	20394000	15776000	22922000	10316000	0	0	4.16464	4.09247	4.18249	7.26564	1	1
386	B9F4F6;A0A0E0G3Z6;Q6EUF8;B8AEK0;Q0E2K1;A0A0P0VGU3;A1YZC9	B9F4F6;A0A0E0G3Z6;Q6EUF8;B8AEK0;Q0E2K1;A0A0P0VGU3;A1YZC9	Citrate synthase;Citrate synthase;Citrate synthase;Citrate synthase;Citrate synthase (Fragment);Citrate synthase (Fragment);Citrate synthase	Os02g0232400;Os02g0232400 OJ1705_E12.26 OSNPB_020232400;Os02g0232400 OSNPB_020232400;OsI_06467;OsJ_05993	1.20776	0.00382408	up	8.43048	8.15815	313050000	314320000	378850000	128960000	107000000	104760000	8.37981	8.40823	8.5034	8.20901	8.13272	8.13272
387	A0A0E0G421;A0A0E0G420;B8AEK7	A0A0E0G421;A0A0E0G420;B8AEK7	Uncharacterized protein;Uncharacterized protein;Uncharacterized protein	OsI_06478	1.53605	0.373901	up	1.61923	1	0	3328100	0	0	0	0	1	2.85768	1	1	1	1
388	Q6EUK2;B8AEK8;A0A0E0G423	Q6EUK2;B8AEK8;A0A0E0G423	Os02g0234800 protein;Uncharacterized protein;Uncharacterized protein	Os02g0234800 Os02g0234800 OJ1145_E05.10 OsJ_06008 OSNPB_020234800;OsI_06481	7.65989	1.64459e-06	up	3.93732	1	5158500	6214300	13654000	0	0	0	3.85303	3.88866	4.07028	1	1	1
390	Q6EUS6;B8AEL7;A0A0E0G430;Q5Z7I8;O48599;B8B3J3;A0A0E0HS68;Q0DBN4;O48598	Q6EUS6;B8AEL7;A0A0E0G430;Q5Z7I8;O48599;B8B3J3;A0A0E0HS68;Q0DBN4	Aspartate aminotransferase;Aspartate aminotransferase;Aspartate aminotransferase;Aspartate aminotransferase;Aspartate aminotransferase;Aspartate aminotransferase;Aspartate aminotransferase;Aspartate aminotransferase	Os02g0236000 OJ1077_A12.15 OsJ_06017 OSNPB_020236000;Os06g0548000 Os06g0548000 OSNPB_060548000;OsI_06490;OsI_23308;OsJ_21631 OSJNBa0016D02.34	114.17	1.01727e-08	up	7.83504	1	85829000	117810000	95417000	0	0	0	7.76107	7.91287	7.8312	1	1	1
391	Q9FYX8;Q6EUD7;B8AEX3;A0A0E0G472;A0A0E0G473;B9F4R1;A0A0P0VH17;Q6EUD8;A0A0E0FIC7;Q5QNA5;F1T2K8;A2WLX8	Q9FYX8;Q6EUD7;B8AEX3;A0A0E0G472;A0A0E0G473;B9F4R1;A0A0P0VH17	Phosphoenolpyruvate carboxylase;Os02g0244700 protein;Uncharacterized protein;Uncharacterized protein;Uncharacterized protein;Uncharacterized protein;Os02g0244700 protein (Fragment)	OJ1134_F06.2-2 Os02g0244700 OSNPB_020244700;Os01g0208700 Os01g0208700 OsJ_00832 OSJNBa0016I09.26 OSNPB_010208700;Os02g0244700 Os02g0244700 OJ1134_F06.2-1 OSNPB_020244700;Os02g0244700 OSNPB_020244700;OsI_00846;OsI_06526;OsJ_06051;ppc	5.83454	0.300912	up	7.83207	5.28745	95467000	97192000	95949000	15753000	0	17277000	7.8312	7.83069	7.83432	7.40472	1	7.45764
392	A0A0P0VGY4;Q6EUD5;A0A0E0G474;A2X2W1	A0A0P0VGY4;Q6EUD5;A0A0E0G474;A2X2W1	Os02g0245000 protein (Fragment);Os02g0245000 protein;Uncharacterized protein;Uncharacterized protein	Os02g0245000 OJ1134_F06.6 OsJ_06052 OSNPB_020245000;Os02g0245000 OSNPB_020245000;OsI_06527	3.92389	0.116124	up	2.97228	1	7181700	0	9058300	0	0	0	3.94521	1	3.97164	1	1	1
393	Q6K3R8;A0A0E0G4A2;A2YMQ7	Q6K3R8;A0A0E0G4A2;A2YMQ7	T-complex protein 1 subunit gamma;T-complex protein 1 subunit gamma;Uncharacterized protein	Os02g0247200 OSJNBa0090H18.25 OSNPB_020247200;OsI_26510	2.03268	0.373901	up	2.02338	1	0	14193000	0	0	0	0	1	4.07015	1	1	1	1
394	A2X335;A3A568;A0A0E0G4H1	A2X335;A3A568;A0A0E0G4H1	Uncharacterized protein;Uncharacterized protein;Uncharacterized protein	OsI_06619;OsJ_06127	4.30314	0.116117	up	3.10539	1	19521000	21690000	0	0	0	0	4.15539	4.16078	1	1	1	1
395	B8ANL7;Q10G56;A0A0E0G4H9;B9F9X9	B8ANL7;Q10G56;A0A0E0G4H9;B9F9X9	Ornithine aminotransferase;Ornithine aminotransferase, mitochondrial;Ornithine aminotransferase;Ornithine aminotransferase	OAT Os03g0643300 LOC_Os03g44150 OSJNBa0038E17.15;OsI_12787;OsJ_11874	2.03182	0.373901	up	2.02278	1	0	14130000	0	0	0	0	1	4.06833	1	1	1	1
398	A0A0P0VHE6;Q6ETX5;A2X381;A0A0E0G4N8;A0A0P0VHC3	A0A0P0VHE6;Q6ETX5;A2X381;A0A0E0G4N8;A0A0P0VHC3	Reticulon-like protein (Fragment);Reticulon-like protein;Reticulon-like protein;Reticulon-like protein;Os02g0265900 protein	Os02g0265900 OSNPB_020265900;OsI_06662;P0006C08.29-1 Os02g0265900 OsJ_06173 OSNPB_020265900	2.89348	0.131585	up	2.53281	1	3717800	0	2265000	0	0	0	2.84225	1	3.75617	1	1	1
399	B8AFB9;Q6ERV1;A0A0E0G4P9	B8AFB9;Q6ERV1;A0A0E0G4P9	Uncharacterized protein;Os02g0267000 protein;Uncharacterized protein	Os02g0267000 Os02g0267000 OsJ_06181 OSNPB_020267000 P0693E08.3;OsI_06670	40.4321	0.00771592	up	6.33743	1	36758000	24628000	47849000	0	0	0	7.34686	4.18583	7.4796	1	1	1
400	Q9ZSU0;Q5ZA98;A2YCB9;A0A0E0G4Q9	Q9ZSU0;Q5ZA98;A2YCB9;A0A0E0G4Q9	Chlorophyll a-b binding protein, chloroplastic;Chlorophyll a-b binding protein, chloroplastic;Chlorophyll a-b binding protein, chloroplastic;Chlorophyll a-b binding protein, chloroplastic	Cab26;Os06g0320500 OsJ_21156 OSNPB_060320500 P0578B12.4;OsI_22755	1.48863	6.18563e-05	up	9.30087	8.72688	2119200000	2612500000	2487800000	464710000	395520000	430160000	9.24826	9.34223	9.31212	8.7555	8.69551	8.72964
401	Q5Z9Z3;A2YCB4;A0A0E0G4R3	Q5Z9Z3;A2YCB4;A0A0E0G4R3	Thioredoxin-like protein Clot;Uncharacterized protein;Uncharacterized protein	Os06g0320000 LOC_Os06g21550 OsJ_21152 P0592B08.32;OsI_22750	2.07311	0.373901	up	2.0518	1	0	21207000	0	0	0	0	1	4.15539	1	1	1	1
403	Q0E217;Q6ES23;A3A5J9;A2X3G6;A0A0E0G4W1;Q75GB0;Q0DJT2;B9FNC7;A0A0E0HBA1;B8AZP2	Q0E217;Q6ES23;A3A5J9;A2X3G6;A0A0E0G4W1;Q75GB0;Q0DJT2;B9FNC7;A0A0E0HBA1;B8AZP2	Os02g0280500 protein (Fragment);Putative glyoxalase I;Uncharacterized protein;Uncharacterized protein;Uncharacterized protein;Lactoylglutathione lyase;Lactoylglutathione lyase (Fragment);Lactoylglutathione lyase;Lactoylglutathione lyase;Uncharacterized pro	Os02g0280500 Os02g0280500 OSNPB_020280500;Os05g0230900 Os05g0230900 OSNPB_050230900;OsI_06754;OsI_19060;OsJ_06256;OsJ_17701;OSJNBa0042F15.5;P0669G10.7	8.33403	2.04917e-07	up	4.05902	1	9755000	11989000	19260000	0	0	0	4.00156	4.03563	4.13985	1	1	1
404	Q6K8B8;O65108;A2X3J5;A0A0E0G4Y9;A0A0P0VHP9;B9F522	Q6K8B8;O65108;A2X3J5;A0A0E0G4Y9;A0A0P0VHP9;B9F522	40S ribosomal protein S3a;40S ribosomal protein S3a;40S ribosomal protein S3a;40S ribosomal protein S3a;Os02g0287000 protein (Fragment);40S ribosomal protein S3a	Os02g0287000 OJ1115_D03.49 OJ1756_H07.11 OSNPB_020287000;Os02g0287000 OSNPB_020287000;OsI_06784;OsJ_06287;RSPSP94	2.00806	0.373901	up	2.0058	1	10763000	0	0	0	0	0	4.0174	1	1	1	1	1
405	Q6K8M0;B9F547;B8AFW5;A0A0E0G560;A0A0E0G561	Q6K8M0;B9F547;B8AFW5;A0A0E0G560;A0A0E0G561	Os02g0297600 protein;Uncharacterized protein;Uncharacterized protein;Uncharacterized protein;Uncharacterized protein	Os02g0297600 OJ1654_A02.17 OSNPB_020297600;OsI_06843;OsJ_06354	2.00541	0.373901	up	2.00389	1	0	10997000	0	0	0	0	1	4.01168	1	1	1	1
411	A0A0P0VIA6;Q8W3N9;Q6Z875;A0A0E0G5S1;B9F5D5;B8AGL8;A0A0E0GYK4;Q7XW77;Q01LX5;A0A0E0GYK3;A3B8V5;Q5Z9Q8;A2YGY8;A0A0E0HVD1;A0A0E0HVD0;A2Y9V7;A3ACE6;A2XAQ0;A0A0E0HPY7;Q5SNC0;P46465;A0A0E0GE82;B8ARW9;A0A2U1ESX3	A0A0P0VIA6;Q8W3N9;Q6Z875;A0A0E0G5S1;B9F5D5;B8AGL8;A0A0E0GYK4;Q7XW77;Q01LX5;A0A0E0GYK3;A3B8V5;Q5Z9Q8;A2YGY8;A0A0E0HVD1;A0A0E0HVD0;A2Y9V7;A3ACE6;A2XAQ0;A0A0E0HPY7;Q5SNC0;P46465;A0A0E0GE82;B8ARW9;A0A2U1ESX3	Os02g0325100 protein (Fragment);26S proteasome regulatory particle triple-A ATPase subunit3 (Fragment);Os02g0325100 protein;Uncharacterized protein;Uncharacterized protein;Uncharacterized protein;Uncharacterized protein;OSJNBa0019J05.17 protein;OSIGBa0145C	ftsH C7337_4888;Os02g0325100 Os02g0325100 OSNPB_020325100 P0476C12.12;Os02g0325100 OSNPB_020325100;Os04g0284600 OsJ_14130 OSJNBa0019J05.17 OSNPB_040284600;Os06g0173100 Os06g0173100 OSJNBa0014B15.23 OSNPB_060173100;Os06g0714500 Os06g0714500 OsJ_22651 OSNPB_060714500 P0481E08.4;OsI_06998;OsI_09330;OsI_15211;OsI_21861;OsI_24453;OSIGBa0145C02.5;OsJ_06499;OsJ_08763;OsJ_20298;OsRPT3;TBP1 OsRPT5a Os02g0…	4.06532	0.116118	up	3.02337	1	12086000	0	11285000	0	0	0	4.04064	1	4.02947	1	1	1
413	Q6Z6B5;B8AGN1;A0A0E0G5U5;A0A0E0G5U6;B9F5E4;B9EZ92;B8ACZ4;A0A0E0FFH9;A0A0P0UXN1	Q6Z6B5;B8AGN1;A0A0E0G5U5;A0A0E0G5U6;B9F5E4;B9EZ92;B8ACZ4;A0A0E0FFH9;A0A0P0UXN1	Os02g0328300 protein;Uncharacterized protein;Uncharacterized protein;Uncharacterized protein;Uncharacterized protein;Uncharacterized protein;Uncharacterized protein;Uncharacterized protein;Os01g0120600 protein (Fragment)	Os01g0120600 OSNPB_010120600;Os02g0328300 Os02g0328300 OJ1521_G01.2 OSNPB_020328300 P0622F08.20;OsI_00167;OsI_07017;OsJ_00173;OsJ_06514	9.23917	1.5421e-12	up	4.20776	1	25409000	26766000	26021000	0	0	0	4.2092	4.20329	4.2108	1	1	1
414	A0A0E0IV12;A0A0E0G5W7;Q6YUK5;A0A0E0G5W8;A2YUU5	A0A0E0IV12;A0A0E0G5W7;Q6YUK5;A0A0E0G5W8;A2YUU5	T-complex protein 1 subunit delta;T-complex protein 1 subunit delta;T-complex protein 1 subunit delta;T-complex protein 1 subunit delta;T-complex protein 1 subunit delta	Os02g0332200 OsJ_23870 OSJNBb0037J12.26 OSNPB_020332200;OsI_29091	4.1328	0.116296	up	3.04712	1	9892600	0	18951000	0	0	0	4.00536	1	4.136	1	1	1
415	Q6ETC4;A0A0E0G653;A2X4D4;B9F5H7	Q6ETC4;A0A0E0G653;A2X4D4;B9F5H7	Os02g0448400 protein;Uncharacterized protein;Uncharacterized protein;Uncharacterized protein	Os02g0448400 Os02g0448400 OJ1538_H05.7 OSNPB_020448400;OsI_07062;OsJ_06577	118.824	2.90842e-08	up	7.89269	1	124610000	124290000	83912000	0	0	0	7.95437	7.94594	7.77775	1	1	1
416	A0A0N7KF97;A0A0E0G6F3;A0A0E0G6F1;A0A0E0G6F2;A0A0E0G6F0;A0A0E0G6E9;B9EZX4;B8AHJ2	A0A0N7KF97;A0A0E0G6F3;A0A0E0G6F1;A0A0E0G6F2;A0A0E0G6F0;A0A0E0G6E9;B9EZX4;B8AHJ2	Os02g0469200 protein;Uncharacterized protein;Uncharacterized protein;Uncharacterized protein;Uncharacterized protein;Uncharacterized protein;Uncharacterized protein;Uncharacterized protein	Os02g0469200 OSNPB_020469200;OsI_07162;OsJ_06679	8.83838	3.12962e-08	up	4.14378	1	15784000	19156000	24314000	0	0	0	4.10238	4.13521	4.19375	1	1	1
418	B9F4T3;B8AEZ5;T1T6C4;T1T4F0;Q0E2D2;P14323;A0A0E0G6R1;B9F4T2;A2X301;B9F4T1;Q0E2D5;Q02897;A1YQH5;A1YQH4;A2X2Z8;B8AEZ0;B9EZT3;B8AH66;A1YQH6;Q9ZWJ8;Q6K7K6;A0A0E0G669;A0A0E0FMV5	B9F4T3;B8AEZ5;T1T6C4;T1T4F0;Q0E2D2;P14323;A0A0E0G6R1;B9F4T2;A2X301;B9F4T1;Q0E2D5;Q02897;A1YQH5;A1YQH4	Uncharacterized protein;Uncharacterized protein;Glutelin (Fragment);Glutelin;Glutelin;Glutelin type-B 1;Uncharacterized protein;Uncharacterized protein;Uncharacterized protein;Uncharacterized protein;Glutelin;Glutelin type-B 2;Glutelin;Glutelin	GLUB1-B GLUB-1 Os02g0249900 LOC_Os02g15178 OJ1113_G05.4 OSJNBa0011N12.34;GluB1-A GluB-1 Os02g0249800 LOC_Os02g15169 OJ1113_G05.6 OSJNBa0011N12.36;GLUB2 GLUB-2 GluB-7 GLUB7 Os02g0249600 LOC_Os02g15150 OSJNBa0011N12.30;Os02g0249600;Os02g0249800 Os02g0249900;OsI_06562;OsI_06570;OsI_06572;OsI_06573;OsI_07091;OsJ_06082;OsJ_06084;OsJ_06085;OsJ_06602;P0533E11.34-1 Os02g0453600	121.167	1.32502e-07	up	7.92085	1	152900000	100750000	95217000	0	0	0	8.0895	7.84237	7.83069	1	1	1
420	Q0E129;Q6K925;A3A743;A0A0E0G6V8;A2X532	Q0E129;Q6K925;A3A743;A0A0E0G6V8;A2X532	Os02g0497700 protein (Fragment);Os02g0497700 protein;Uncharacterized protein;Uncharacterized protein;Uncharacterized protein	Os02g0497700 OJ1288_D09.22 OSNPB_020497700;Os02g0497700 Os02g0497700 OSNPB_020497700;OsI_07304;OsJ_06818	2.01887	0.373901	up	2.01355	1	0	12291000	0	0	0	0	1	4.04064	1	1	1	1
421	A0A0E0G6Y5;Q6K6C8;A2X547;A0A0E0G6Y4;A0A0P0VJA4	A0A0E0G6Y5;Q6K6C8;A2X547;A0A0E0G6Y4;A0A0P0VJA4	Uncharacterized protein;Putative cytochrome P450 monooxygenase;Uncharacterized protein;Uncharacterized protein;Os02g0503100 protein	OJ1126_B06.10 P0654A08.41;Os02g0503100 OSNPB_020503100;OsI_07321	4.32228	0.116141	up	3.11179	1	18343000	0	24221000	0	0	0	4.14279	1	4.19259	1	1	1
422	B8AT03;Q7XMJ1;Q6K667;B8AIB7;A3AT03;A0A0E0IJ46;A0A0E0G6Y7;B8AT01;Q0D991;B9FR32;A0A0E0HW03;A0A0E0HW02;A0A0E0HW01;Q5Z3Z9	B8AT03;Q7XMJ1;Q6K667;B8AIB7;A3AT03;A0A0E0IJ46;A0A0E0G6Y7;B8AT01;Q0D991;B9FR32;A0A0E0HW03;A0A0E0HW02;A0A0E0HW01	Uncharacterized protein;OSJNBb0006N15.8 protein;Os02g0503400 protein;Uncharacterized protein;Uncharacterized protein;Uncharacterized protein;Uncharacterized protein;Uncharacterized protein;Os06g0732000 protein;Uncharacterized protein;Uncharacterized protei	B1206D04.28 OSJNOa230J22.1;Os02g0503400 Os02g0503400 OJ1003_F04.3 OJ1126_B06.24 OsJ_06835 OSNPB_020503400;Os04g0376000 Os04g0376000 OSJNBb0006N15.8 OSNPB_040376000;Os06g0732000;OsI_07325;OsI_15569;OsI_15574;OsJ_14490;OsJ_22757	1.46518	0.142697	up	8.5535	8.00243	457680000	418060000	434950000	32691000	37302000	322940000	8.56597	8.54584	8.54869	7.68128	7.71887	8.60712
424	A2X5F7;Q6H4N0;A3A7F5;A0A0E0G7G1;A0A0P0VCC9;A0A0N7KIZ9;A0A0P0XSX0;B9G7S1;B8BFZ1;Q8S1X8;A2WYK9;Q8S1X7;Q33AH8;A2WYL0;A0A0N7KRI5;A0A0E0IV79;Q7XLG3;Q01L35;A2XSZ1;A0A0E0H043;A0A0E0FY87;A0A0E0FY86	A2X5F7;Q6H4N0;A3A7F5;A0A0E0G7G1;A0A0P0VCC9;A0A0N7KIZ9;A0A0P0XSX0;B9G7S1;B8BFZ1;Q8S1X8;A2WYK9;Q8S1X7;Q33AH8;A2WYL0;A0A0N7KRI5;A0A0E0IV79;Q7XLG3;Q01L35;A2XSZ1;A0A0E0H043;A0A0E0FY87;A0A0E0FY86	Uncharacterized protein;Probable glucuronosyltransferase Os02g0520750;Uncharacterized protein;Uncharacterized protein;Os01g0926700 protein (Fragment);Os04g0398600 protein (Fragment);Os10g0180000 protein (Fragment);Uncharacterized protein;Uncharacterized pr	GUT1 Os10g0180000 LOC_Os10g10080 OSJNBa0047G15.26 OSJNBa0095J15.1;H0209H04.3;Os01g0926600 LOC_Os01g70190 OsJ_04617 OSJNBa0093F16.18 P0482D04.16;Os01g0926700 LOC_Os01g70200 OsJ_04618 OSJNBa0093F16.20 P0482D04.17;Os01g0926700 OSNPB_010926700;Os02g0520750 LOC_Os02g32110 OSJNBb0003H22.12;Os04g0398600 LOC_Os04g32670 OsJ_14642 OSJNBa0039C07.13;Os04g0398600 OSNPB_040398600;Os10g0180000 OSNPB_100180000;O…	9.01825	1.37833e-11	up	4.17285	1	21688000	22186000	22292000	0	0	0	4.17768	4.16512	4.17574	1	1	1
425	Q6H4M9;A2X5F8;A0A0E0G7G2;B9F0A5	Q6H4M9;A2X5F8;A0A0E0G7G2;B9F0A5	Cytochrome b-c1 complex subunit Rieske, mitochondrial;Cytochrome b-c1 complex subunit Rieske, mitochondrial;Cytochrome b-c1 complex subunit Rieske, mitochondrial;Uncharacterized protein	Os02g0520800 Os02g0520800 OSJNBa0047A17.2 OSJNBb0003H22.14 OSNPB_020520800;OsI_07438;OsJ_06940	1.00215	0.944213	up	8.36589	8.3628	275390000	269760000	343550000	182060000	180220000	183930000	8.31963	8.32922	8.44883	8.35973	8.36329	8.36537
426	Q7X6J0;Q6H547;A3A7H2;A2X5H4;A0A0E0G7I6;A0A0N7KFE2	Q7X6J0;Q6H547;A3A7H2;A2X5H4;A0A0E0G7I6;A0A0N7KFE2	RNA binding protein Rp120;Os02g0523500 protein;Uncharacterized protein;Uncharacterized protein;Uncharacterized protein;Os02g0523500 protein (Fragment)	Os02g0523500 Os02g0523500 OSJNBa0047A17.32 OSNPB_020523500 P0415B12.4;Os02g0523500 OSNPB_020523500;OsI_07454;OsJ_06956	4.3583	0.436681	up	8.04049	5.91672	169230000	102770000	174820000	185230000	185280000	0	8.13464	7.8522	8.13464	8.37036	8.37981	1
427	A0A0P0VJQ7;Q6H798;B8AIR3;A0A0E0G7K2;Q7X8V5;A0A0E0H0A4;B9FF02;Q01L46;B8ATH2;A0A0P0WAB9;A0A0E0H0A3;Q7F8W1	A0A0P0VJQ7;Q6H798;B8AIR3;A0A0E0G7K2;Q7X8V5;A0A0E0H0A4;B9FF02;Q01L46;B8ATH2;A0A0P0WAB9;A0A0E0H0A3;Q7F8W1	Os02g0525900 protein (Fragment);Acetyl-coenzyme A synthetase;Acetyl-coenzyme A synthetase;Acetyl-coenzyme A synthetase;Acetyl-coenzyme A synthetase;Acetyl-coenzyme A synthetase;Acetyl-coenzyme A synthetase;Acetyl-coenzyme A synthetase;Acetyl-coenzyme A syn	H0502B11.5;OJ000315_02.12;Os02g0525900 OsJ_06966 OSNPB_020525900 P0415B12.41 P0458B05.3;Os02g0525900 OSNPB_020525900;Os04g0404800 OSNPB_040404800;OsI_07465;OsI_15767;OsJ_14684;OSJNBb0118P14.12	8.90966	8.57967e-08	up	4.15537	1	15720000	28458000	19781000	0	0	0	4.1014	4.21962	4.14509	1	1	1
428	A3A7I6;B9FF04;A2X5I8;Q7XL03;Q01L44;Q8GT62;Q6H795;A0A0E0G7K5;B8ATH4	A3A7I6;B9FF04;A2X5I8;Q7XL03;Q01L44;Q8GT62;Q6H795;A0A0E0G7K5;B8ATH4	Uncharacterized protein;Uncharacterized protein;Uncharacterized protein;Chaperone protein ClpD2, chloroplastic;H0502B11.7 protein;ATP-dependent Clp protease ATP-binding subunit;Chaperone protein ClpD1, chloroplastic;Uncharacterized protein;Uncharacterized	CLPD1;CLPD1 Os02g0526400 LOC_Os02g32520 P0458B05.10;CLPD2 Os04g0405000 LOC_Os04g33210 OJ000315_02.14;H0502B11.7;OsI_07468;OsI_15769;OsJ_06970;OsJ_14686	4.22633	0.116117	up	3.0794	1	16650000	17982000	0	0	0	0	4.11686	4.12136	1	1	1	1
430	Q6ESG1;B8AJ09;A0A0E0G7Q2	Q6ESG1;B8AJ09;A0A0E0G7Q2	Probable sodium/metabolite cotransporter BASS4, chloroplastic;Probable sodium/metabolite cotransporter BASS4, chloroplastic;Uncharacterized protein	BASS4 Os02g0531200 LOC_Os02g32930 OsJ_06999 P0605D08.11;BASS4 OsI_07515	4.41881	0.116117	up	3.14366	1	0	27970000	26308000	0	0	0	1	4.21624	4.21473	1	1	1
431	Q6ESF3;A2X5N6;A0A0E0G7Q8	Q6ESF3;A2X5N6;A0A0E0G7Q8	Hydrolase, alpha/beta fold protein-like;Uncharacterized protein;Uncharacterized protein	OsI_07519;P0605D08.22-1 Os02g0532300 OsJ_07003 OSNPB_020532300	1.78522	0.786474	up	4.11689	3.28079	30154000	29214000	0	49420000	0	0	7.12588	4.2248	1	7.84237	1	1
433	Q6EPX0;B8AJ23;A0A0E0G7S4	Q6EPX0;B8AJ23;A0A0E0G7S4	Chaperone protein dnaJ-related-like;Uncharacterized protein;Uncharacterized protein	Os02g0535000 B1136H02.21 OJ1112_G07.8 OsJ_07018 OSNPB_020535000;OsI_07539	3.94923	0.116208	up	2.98157	1	6705700	0	10605000	0	0	0	3.92731	1	4.0174	1	1	1
434	A0A0P0VK57;B9F0D7;B8AJ29;A0A0E0G7T7	A0A0P0VK57;B9F0D7;B8AJ29;A0A0E0G7T7	Os02g0535700 protein;Uncharacterized protein;Uncharacterized protein;Uncharacterized protein	Os02g0535700 OSNPB_020535700;OsI_07542;OsJ_07023	2.06144	0.373901	up	2.04365	1	17762000	0	0	0	0	0	4.13096	1	1	1	1	1
435	Q6ER94;B8AJ36;A0A0E0G7U2;A6MZU3;Q7M241;Q7X679;Q01I46	Q6ER94;B8AJ36;A0A0E0G7U2;A6MZU3	2-Cys peroxiredoxin BAS1, chloroplastic;Uncharacterized protein;Uncharacterized protein;2-cys peroxiredoxin bas1 (Fragment)	BAS1 Os02g0537700 LOC_Os02g33450 OsJ_07037 OSJNBa0014M17.2 P0508B05.23;OJ991214_12.15 OSJNBa0033G16.2;OsI_07554;OSIGBa0092M08.6	107.539	3.97618e-07	up	7.74872	1	53171000	83871000	112780000	0	0	0	7.55889	7.75321	7.93406	1	1	1
437	Q01LH6;P0DKK9;P0DKK8;B8AJD1;A0A0E0G7X7;A6MZC6;A0A0E0G7X8	Q01LH6;P0DKK9;P0DKK8;B8AJD1;A0A0E0G7X7;A6MZC6;A0A0E0G7X8	B0222C05.3 protein;40S ribosomal protein S10-2;40S ribosomal protein S10-1;Uncharacterized protein;Uncharacterized protein;40S ribosomal protein S10 (Fragment);Uncharacterized protein	B0222C05.3;OsI_07603 OsI_15930;RPS10-1 Os02g0549600 LOC_Os02g34460 OsJ_07087 OSJNBa0040I22.20 P0451A10.8;RPS10-2 Os04g0430100 LOC_Os04g35090 OsJ_14842 OSJNBa0042L16.19	1.71126	1.95941e-05	up	8.99046	8.2154	1311600000	1033700000	1216900000	122230000	129100000	131830000	9.04843	8.94989	8.97306	8.18661	8.23051	8.22908
438	Q2QND8;A2ZLU2;A0A0E0G7Z1	Q2QND8;A2ZLU2;A0A0E0G7Z1	Os12g0569300 protein;Uncharacterized protein;Uncharacterized protein	LOC_Os12g38150 Os12g0569300 OSNPB_120569300;OsI_38786	8.04551	3.26667e-08	up	4.00818	1	12766000	10494000	8851400	0	0	0	4.05554	4.00243	3.96658	1	1	1
439	D1ML69;A0A0E0H102;A0A0P0W3P0;A0A0P0WAB7;B9F5V1;A0A0E0GU72;A0A0E0H101;A2XMA1;Q7XQP4;Q01LD0;A0A0U1XNH7;Q6ZI44;B8AJD8;A0A0E0G827;Q259V2;A2XZ95;A0A0E0H837;Q7XKA8;Q7Y0B9	D1ML69;A0A0E0H102;A0A0P0W3P0;A0A0P0WAB7;B9F5V1;A0A0E0GU72;A0A0E0H101;A2XMA1;Q7XQP4;Q01LD0;A0A0U1XNH7;Q6ZI44;B8AJD8;A0A0E0G827;Q259V2;A2XZ95;A0A0E0H837;Q7XKA8;Q7Y0B9	Serine threonine kinase SAPK-5 (Fragment);Uncharacterized protein;Os03g0764800 protein (Fragment);Os04g0432000 protein (Fragment);Uncharacterized protein;Uncharacterized protein;Uncharacterized protein;Uncharacterized protein;Serine/threonine-protein kinas	B0308C03.1;B0518A01.2 H0814G11.23;Os03g0764800 OSNPB_030764800;Os04g0432000 OSNPB_040432000;OsI_07615;OsI_13649;OsI_18035;OsJ_12698;SAPK5 RK3 Os04g0691100 LOC_Os04g59450 OsJ_16733 OSJNBb0020J19.1;SAPK6 RK1 Os02g0551100 LOC_Os02g34600 OJ1004_H01.2 OsJ_07099 P0451A10.35;SAPK7 RK4 Os04g0432000 LOC_Os04g35240 OsJ_14855 OSJNBa0084A10.12;SAPK8 Os03g0764800 LOC_Os03g55600 OSJNBa0079B15.27;SnRK	4.51494	0.373901	up	3.17471	1	0	52269000	0	0	0	0	1	7.52412	1	1	1	1
440	B8AE02;Q6ZI86;A0A0E0G871	B8AE02;Q6ZI86;A0A0E0G871	Uncharacterized protein;Dehydrogenase-like protein;Uncharacterized protein	Os02g0556100 Os02g0556100 OJ1008_F08.11 OsJ_07133 OSNPB_020556100;OsI_07649	4.37878	0.373901	up	3.13053	1	0	40535000	0	0	0	0	1	7.39158	1	1	1	1
442	B8ADX6;A0A0E0G885;Q6YVX8;A3A812	B8ADX6;A0A0E0G885;Q6YVX8;A3A812	Uncharacterized protein;Uncharacterized protein;Os02g0557600 protein;Uncharacterized protein	Os02g0557600 OSJNBb0038F20.9 OSNPB_020557600;OsI_07662;OsJ_07144	4.25822	0.116238	up	3.09025	1	14190000	0	23868000	0	0	0	4.08058	1	4.19017	1	1	1
444	Q6Z7F3;A2X661;A0A0E0G8F0;A0A0N7KN06;A0A0E0HXA5	Q6Z7F3;A2X661;A0A0E0G8F0;A0A0N7KN06;A0A0E0HXA5	Os02g0564200 protein;Uncharacterized protein;Uncharacterized protein;Os07g0175750 protein (Fragment);Uncharacterized protein	Os07g0175750 OSNPB_070175750;OsI_07695;P0020C11.12-1 OJ1712_E04.23-1 Os02g0564200 OsJ_07168 OSNPB_020564200	148.572	1.23004e-09	up	8.21502	1	231400000	221480000	186670000	0	0	0	8.25021	8.23357	8.16127	1	1	1
446	Q6EP57;A0A0E0G8S3;A3A8B8	Q6EP57;A0A0E0G8S3;A3A8B8	Os02g0578400 protein;Uncharacterized protein;Uncharacterized protein	Os02g0578400 Os02g0578400 B1267B06.4 B1342F01.35 OSNPB_020578400;OsJ_07256	127.464	1.2708e-09	up	7.99395	1	122090000	142840000	135510000	0	0	0	7.94231	8.03142	8.00812	1	1	1
449	Q0E032;B8AEM8;A0A0E0G8V9;Q6EUN4	Q0E032;B8AEM8;A0A0E0G8V9;Q6EUN4	Os02g0581100 protein;Uncharacterized protein;Uncharacterized protein;Uncharacterized protein OJ1115_A05.15	OJ1115_A05.15;Os02g0581100 Os02g0581100 OSNPB_020581100;OsI_07816	21.7263	0.116175	up	5.44137	1	56676000	0	80094000	0	0	0	7.58095	1	7.74317	1	1	1
451	Q93WM3;A2WQ40;A0A0E0G940;A2ZT90	Q93WM3;A2WQ40;A0A0E0G940;A2ZT90	Os01g0372700 protein;Uncharacterized protein;Uncharacterized protein;Uncharacterized protein	Os01g0372700 Os01g0372700 B1039D07.28 B1045D11.6 OSNPB_010372700;OsI_01974;OsJ_01810	3.99627	0.116117	up	2.99865	1	9410300	0	9955600	0	0	0	3.9963	1	3.99966	1	1	1
452	Q6YY64;A2X6N1;A0A0E0G959	Q6YY64;A2X6N1;A0A0E0G959	60S ribosomal protein L6;60S ribosomal protein L6;60S ribosomal protein L6	Os02g0591700 Os02g0591700 OsJ_07332 OSJNBa0006O15.44 OSJNBa0016G10.4 OSNPB_020591700;OsI_07870	101.494	9.66485e-09	up	7.66526	1	62115000	63086000	80267000	0	0	0	7.62803	7.61821	7.74952	1	1	1
453	Q6ZH86;A2X6P4;A0A0E0G974;Q6ZH87	Q6ZH86;A2X6P4;A0A0E0G974;Q6ZH87	Phosphate transporter;Phosphate transporter;Phosphate transporter;Phosphate transporter	Os02g0593500 OJ1067_B01.4-1 OsJ_07345 OSJNBa0016G10.26-1 OSNPB_020593500;Os02g0593500 OJ1067_B01.4-2 OSJNBa0016G10.26-2 OSNPB_020593500;OsI_07884	3.99447	0.116286	up	2.99801	1	13000000	0	7638000	0	0	0	4.05883	1	3.93519	1	1	1
454	A3A8M2;A0A0E0G998;Q6ZI55;A2X6Q9	A3A8M2;A0A0E0G998;Q6ZI55;A2X6Q9	Uncharacterized protein;Uncharacterized protein;NAD-dependent isocitrate dehydrogenase c;2;Uncharacterized protein	2 Os02g0595500 OJ1126_D09.28 OSNPB_020595500;OsI_07898;OsIDHc;OsJ_07363	7.78894	2.58879e-06	up	3.96143	1	5436900	6611000	16867000	0	0	0	3.8717	3.90008	4.11251	1	1	1
455	Q8W2C3;Q6ZI53;A0A0E0G999;B8AEQ9;Q9SEF8;Q6ZI52;A0A0P0VLD7	Q8W2C3;Q6ZI53;A0A0E0G999;B8AEQ9;Q9SEF8	Elongation factor Tu;Elongation factor Tu;Elongation factor Tu;Elongation factor Tu;Elongation factor Tu	OJ1126_D09.31-1 Os02g0595700 OsJ_07364 OSNPB_020595700;OJ1126_D09.31-2;Os02g0595700 OSNPB_020595700;OsI_07899;tufA	5.57492	0.364795	up	8.31211	5.83316	113170000	422570000	358630000	0	206610000	92551000	7.90987	8.55371	8.47276	1	8.41491	8.08457
459	B9FKS6;B8AZA5;A0A0P0WNT5;A0A0E0G9G3;A0A0P0WNR8;Q75GM2	B9FKS6;B8AZA5;A0A0P0WNT5;A0A0E0G9G3;A0A0P0WNR8	Uncharacterized protein;Uncharacterized protein;Os05g0480000 protein;Uncharacterized protein;Os05g0480000 protein (Fragment)	Os05g0480000 OSJNBa0018K15.17;Os05g0480000 OSNPB_050480000;OsI_20353;OsJ_18941	21.7365	0.125839	up	7.74308	3.30103	68887000	104620000	73622000	0	0	54523000	7.6659	7.85806	7.70528	1	1	7.9031
461	Q6K5G8;A1YR13;A0A2H4N016;A0A0E0G9H9;B8AF09;Q8H6A7	Q6K5G8;A1YR13;A0A2H4N016;A0A0E0G9H9;B8AF09;Q8H6A7	Glyceraldehyde-3-phosphate dehydrogenase 3, cytosolic;Glyceraldehyde-3-phosphate dehydrogenase;Glyceraldehyde-3-phosphate dehydrogenase;Glyceraldehyde-3-phosphate dehydrogenase;Glyceraldehyde-3-phosphate dehydrogenase;Cytosolic glyceraldehyde-3-phosphate d	GAPC3 GAPDH Os02g0601300 LOC_Os02g38920 OJ1791_B03.34 OsJ_07411;OsI_07948	28.2753	0.11616	up	5.82147	1	270190000	189910000	0	0	0	0	8.30752	8.15689	1	1	1	1
462	A0A0P0VLM9;Q6K1Y0;B9F102;B8AF39;A0A0E0G9P2	A0A0P0VLM9;Q6K1Y0;B9F102;B8AF39;A0A0E0G9P2	Os02g0608400 protein (Fragment);Os02g0608400 protein;Uncharacterized protein;Uncharacterized protein;Uncharacterized protein	Os02g0608400 Os02g0608400 OSJNBa0030C08.32 OSNPB_020608400 P0496E03.5;Os02g0608400 OSNPB_020608400;OsI_08008;OsJ_07470	85.8951	1.43226e-07	up	7.4245	1	44809000	34947000	53910000	0	0	0	7.4704	7.26904	7.53407	1	1	1
463	A6N0G3;B8AF40;A0A0N7KFN2;B9F103;A0A0E0G9P3;Q6K1X9	A6N0G3;B8AF40;A0A0N7KFN2;B9F103;A0A0E0G9P3;Q6K1X9	Non-receptor tyrosine kinase spore lysis a (Fragment);Uncharacterized protein;Os02g0608500 protein (Fragment);Uncharacterized protein;Uncharacterized protein;Os02g0608500 protein	Os02g0608500 OSJNBa0030C08.33 OSNPB_020608500 P0496E03.6;Os02g0608500 OSNPB_020608500;OsI_08009;OsJ_07471	2.07481	0.373901	up	2.05298	1	19888000	0	0	0	0	0	4.15894	1	1	1	1	1
464	B9F104;A0A0E0G9P4;B8AFH3	B9F104;A0A0E0G9P4;B8AFH3	Uncharacterized protein;Uncharacterized protein;Uncharacterized protein	OsI_08011;OsJ_07472	1.97191	0.373901	up	1.9796	1	0	0	7745600	0	0	0	1	1	3.93879	1	1	1
465	A2X724;A0A0E0G9P7;Q6K1X5	A2X724;A0A0E0G9P7;Q6K1X5	Uncharacterized protein;Uncharacterized protein;Os02g0608900 protein	Os02g0608900 OSJNBa0030C08.39 OSNPB_020608900 P0496E03.12;OsI_08014	152.393	1.46973e-11	up	8.25166	1	219390000	233660000	229150000	0	0	0	8.23357	8.26197	8.25942	1	1	1
468	A0A0E0G9U4;A0A0E0G9U3;A0A0E0G9U0;A0A0E0G9U2;A0A0E0G9U1;B9F137;B8AFG5	A0A0E0G9U4;A0A0E0G9U3;A0A0E0G9U0;A0A0E0G9U2;A0A0E0G9U1;B9F137;B8AFG5	Uncharacterized protein;Uncharacterized protein;Uncharacterized protein;Uncharacterized protein;Uncharacterized protein;Uncharacterized protein;Uncharacterized protein	OsI_08085;OsJ_07538	1.82985	0.156436	up	1.87173	1	1958000	935900	0	0	0	0	1.88197	2.73321	1	1	1	1
469	B9F156;Q7X752;Q6K1Q6;Q01I11;B8AS12;A2X7C9;A0A0E0GXN6;A0A0E0G9W1;Q0DZF7	B9F156;Q7X752;Q6K1Q6;Q01I11;B8AS12;A2X7C9;A0A0E0GXN6;A0A0E0G9W1	Uncharacterized protein;OSJNBb0070J16.13 protein;Os02g0622300 protein;OSIGBa0140J09.10 protein;Uncharacterized protein;Uncharacterized protein;Uncharacterized protein;Uncharacterized protein	Os02g0622300;Os04g0515300 OsJ_15457 OSJNBb0070J16.13 OSJNBb0072M01.9 OSNPB_040515300;OsI_08121;OsI_16636;OSIGBa0140J09.10;OsJ_07573;OsRPL14 Os02g0622300 OJ1234_B11.29 OSJNOa283G08.1 OSNPB_020622300	27.5705	0.120785	up	8.21905	3.434	169440000	253000000	214040000	160400000	0	0	8.13588	8.30201	8.21928	8.30201	1	1
470	Q8L5P6;A0A0P0VLT9;Q6K1R5;A0A0E0G9X9;Q84P58;Q0DZE5;A2X7E9	Q8L5P6;A0A0P0VLT9;Q6K1R5;A0A0E0G9X9;Q84P58;Q0DZE5;A2X7E9	Adenosine kinase;Os02g0625500 protein (Fragment);Putative adenosine kinase;Uncharacterized protein;Adenosine kinase-like protein (Fragment);Os02g0625500 protein (Fragment);Uncharacterized protein	B1215B07.34 OsJ_07588;Os02g0625500 Os02g0625500 OSNPB_020625500;Os02g0625500 OSNPB_020625500;OsAK;OsI_08139	4.12597	0.116121	up	3.04473	1	0	14790000	12822000	0	0	0	1	4.07707	4.05713	1	1	1
471	A2X7G8;A0A0E0GA04;A3A997;Q6K215;A0A0P0VM00;A3AVM4	A2X7G8;A0A0E0GA04;A3A997;Q6K215;A0A0P0VM00	Uncharacterized protein;Uncharacterized protein;Uncharacterized protein;Probable aquaporin PIP2-2;Os02g0629200 protein	Os02g0629200 OSNPB_020629200;OsI_08158;OsJ_07605;OsJ_15489;PIP2-2 Os02g0629200 LOC_Os02g41860 B1469H02.22-1	1.01087	0.420366	up	8.96246	8.94687	1086900000	1096000000	1151900000	778170000	711230000	716890000	8.97306	8.97756	8.93676	8.94198	8.969	8.92962
472	B9F188;Q6H7J6;A0A0E0GA47;A2X7J5	B9F188;Q6H7J6;A0A0E0GA47;A2X7J5	Uncharacterized protein;Probable metal-nicotianamine transporter YSL14;Uncharacterized protein;Uncharacterized protein	OsI_08181;OsJ_07631;YSL14 Os02g0633300 LOC_Os02g42220 OJ1643_A10.18	2.04772	0.373901	up	2.03402	1	0	0	15865000	0	0	0	1	1	4.10206	1	1	1
473	Q6H7I9;A0A0E0GA51;A3A9C6;A2X7K2;A3AVQ4;Q7XKK0;Q01HQ5;A2XVP6;Q0JBL5;A0A0E0I4B0	Q6H7I9;A0A0E0GA51;A3A9C6;A2X7K2;A3AVQ4;Q7XKK0;Q01HQ5;A2XVP6;Q0JBL5;A0A0E0I4B0	ATP-dependent Clp protease proteolytic subunit;ATP-dependent Clp protease proteolytic subunit;ATP-dependent Clp protease proteolytic subunit;ATP-dependent Clp protease proteolytic subunit;ATP-dependent Clp protease proteolytic subunit;ATP-dependent Clp pro	Os02g0634500 OJ1643_A10.30 OSNPB_020634500;Os04g0525600 Os04g0525600 OSNPB_040525600;OsI_08189;OsI_16707;OSIGBa0153E02-OSIGBa0093I20.20;OsJ_07636;OsJ_15521;OSJNBa0038O10.7 Os04g0525600 OSNPB_040525600	14.2702	0.00458154	up	4.83493	1	29454000	24130000	20592000	0	0	0	6.17244	4.17964	4.1527	1	1	1
475	Q6H660;A0A0E0GAD8;B9F1C2;B8AG03;Q0JBE4;B8ASK6;A0A0P0WD35;A0A0E0H3M2;Q7XQQ8	Q6H660;A0A0E0GAD8;B9F1C2;B8AG03	Os02g0644100 protein;Uncharacterized protein;Uncharacterized protein;Uncharacterized protein	Os02g0644100 Os02g0644100 OJ1282_H11.17 OSNPB_020644100;Os04g0538000 OsJ_15608;Os04g0538000 OSNPB_040538000;OsI_08254;OsI_16799;OsJ_07704;OSJNBa0091D06.14	3.97937	0.116197	up	2.99254	1	0	11616000	8201500	0	0	0	1	4.03124	3.94638	1	1	1
477	B7E8M1;A3A9L8;B9F1D9;A0A0E0GAG3;Q6H3Z3;A2X7U6;A0A0E0GAG4;Q6H3Z6;Q7XN54;K7ZRZ3;Q7XUJ2;Q01IJ7;A0A0P0WDA4;A0A0E0H3R8;A3AW11;A2XW10;A0A0E0H3R5;A2XW13;B9FGE3;A0A0E0H3R7	B7E8M1;A3A9L8;B9F1D9;A0A0E0GAG3;Q6H3Z3;A2X7U6;A0A0E0GAG4;Q6H3Z6;Q7XN54;K7ZRZ3;Q7XUJ2;Q01IJ7;A0A0P0WDA4;A0A0E0H3R8;A3AW11;A2XW10;A0A0E0H3R5;A2XW13;B9FGE3;A0A0E0H3R7	cDNA clone:001-115-H05, full insert sequence;Uncharacterized protein;Uncharacterized protein;Uncharacterized protein;Iron-phytosiderophore transporter YSL15;Uncharacterized protein;Uncharacterized protein;Metal-nicotianamine transporter YSL2;Probable metal	H0501D11.7;Os04g0542200 OSNPB_040542200;OsI_08289;OsI_16829;OsI_16833;OsJ_07730;OsJ_07732;OsJ_15637;OsJ_15639;OsYSL16;YSL15 Os02g0650300 LOC_Os02g43410 OSJNBb0012J10.10-1 P0048B08.34-1;YSL16 Os04g0542800 LOC_Os04g45900 OSJNBb0103I08.15;YSL2 Os02g0649900 LOC_Os02g43370 OSJNBb0012J10.2 P0048B08.26;YSL9 Os04g0542200 LOC_Os04g45860 OSJNBb0103I08.11	8.53404	5.79215e-09	up	4.09323	1	16233000	17042000	12923000	0	0	0	4.10835	4.11251	4.05883	1	1	1
478	A0A0P0VME2;Q6H3Y3;B8AG21;A0A0E0GAH3;B9F1E3	A0A0P0VME2;Q6H3Y3;B8AG21;A0A0E0GAH3;B9F1E3	Os02g0651300 protein (Fragment);Chaperone protein dnaJ-like;Uncharacterized protein;Uncharacterized protein;Uncharacterized protein	Os02g0651300 Os02g0651300 OSJNBb0012J10.22 OSNPB_020651300;Os02g0651300 OSNPB_020651300;OsI_08297;OsJ_07748	2.03887	0.373901	up	2.02777	1	0	0	14474000	0	0	0	1	1	4.0833	1	1	1
479	Q949E6;Q6H8G5;A2X7W5;A0A0E0GAJ1;A3A9P7	Q949E6;Q6H8G5;A2X7W5;A0A0E0GAJ1;A3A9P7	Uncharacterized protein;Os02g0653400 protein;Uncharacterized protein;Uncharacterized protein;Uncharacterized protein	C395ERIPDM;Os02g0653400 Os02g0653400 OSNPB_020653400 P0491E01.32;OsI_08310;OsJ_07767	4.33322	0.116179	up	3.11544	1	26032000	18983000	0	0	0	0	4.21297	4.13334	1	1	1	1
480	Q949A7;Q7XA61;A2X7Z6;A0A0E0GAN7	Q949A7;Q7XA61;A2X7Z6;A0A0E0GAN7	Putative aquaporin (Fragment);Probable aquaporin TIP2-1;Uncharacterized protein;Uncharacterized protein	C1275ERIPDM;OsI_08345;TIP2-1 TIP2 W950ERIPDM Os02g0658100 LOC_Os02g44080 OJ1112_F09.18 OsJ_007553 P0519E06.48	100.374	2.25093e-07	up	7.64924	1	48942000	59386000	93904000	0	0	0	7.52103	7.59769	7.82901	1	1	1
481	A0A0P0W0N2;A0A0N7KHQ4;A0A0E0GAQ4;Q10G39;B8ANM1	A0A0P0W0N2;A0A0N7KHQ4;A0A0E0GAQ4;Q10G39;B8ANM1	Os03g0645100 protein (Fragment);Os03g0645100 protein (Fragment);Pyruvate dehydrogenase E1 component subunit beta;Pyruvate dehydrogenase E1 component subunit beta-4, chloroplastic;Uncharacterized protein	Os03g0645100 LOC_Os03g44300 OsJ_11888;Os03g0645100 OSNPB_030645100;OsI_12799	8.76625	2.8413e-08	up	4.13196	1	15163000	17606000	22865000	0	0	0	4.09518	4.11855	4.18215	1	1	1
482	A0A0N7KFU2;B9F1I6;A0A0E0GAU1;A0A0E0GAU0;Q6ESI7;B8AGD0;A0A0E0GAT9;A0A0P0VML9	A0A0N7KFU2;B9F1I6;A0A0E0GAU1;A0A0E0GAU0;Q6ESI7;B8AGD0;A0A0E0GAT9;A0A0P0VML9	Os02g0664300 protein (Fragment);Uncharacterized protein;Uncharacterized protein;Uncharacterized protein;Tripeptidyl-peptidase 2;Uncharacterized protein;Uncharacterized protein;Os02g0664300 protein (Fragment)	Os02g0664300 OSNPB_020664300;OsI_08378;OsJ_07840;TPP2 Os02g0664300 LOC_Os02g44520 P0461B08.4-1 P0461B08.4-2	1.96988	0.373901	up	1.97811	1	0	0	7632300	0	0	0	1	1	3.93433	1	1	1
484	B8AGD5;Q6ESH0;A0A0E0GAW5	B8AGD5;Q6ESH0;A0A0E0GAW5	Uncharacterized protein;Os02g0666500 protein;Uncharacterized protein	Os02g0666500 Os02g0666500 OJ1486_E07.14 OsJ_07852 OSNPB_020666500 P0461B08.29;OsI_08390	38.1858	0.0065866	up	6.25496	1	33482000	34297000	28057000	0	0	0	7.28722	7.24983	4.22784	1	1	1
485	A0A0P0VMU1;Q6ESP5;A0A0E0GB05;A0A0P0VMW4	A0A0P0VMU1;Q6ESP5;A0A0E0GB05;A0A0P0VMW4	Os02g0670900 protein (Fragment);Os02g0670900 protein;Uncharacterized protein;Os02g0670900 protein (Fragment)	Os02g0670900 OsJ_07884 P0684A08.36;Os02g0670900 OSNPB_020670900	1.93323	0.373901	up	1.95101	1	0	0	4949600	0	0	0	1	1	3.85303	1	1	1
487	A0A0P0VN80;B9FC11;A0A0P0WDZ5;A0A0P0WDM1;A0A0E0HVU9;B9FR04;B8B2X0;A0A0E0HVU8;Q5Z5B2;A0A0E0GB51;A0A0E0H4H1;B9F1L3;B8AGF0;Q6EU14;B8AT34;Q7XSA2;A0A0E0H4G9;A0A0E0H4H0	A0A0P0VN80;B9FC11;A0A0P0WDZ5;A0A0P0WDM1;A0A0E0HVU9;B9FR04;B8B2X0;A0A0E0HVU8;Q5Z5B2;A0A0E0GB51;A0A0E0H4H1;B9F1L3;B8AGF0;Q6EU14;B8AT34;Q7XSA2;A0A0E0H4G9;A0A0E0H4H0	Os02g0672200 protein (Fragment);Uncharacterized protein;Os04g0566500 protein;Os04g0566500 protein (Fragment);Uncharacterized protein;Uncharacterized protein;Uncharacterized protein;Uncharacterized protein;Protein argonaute 1D;Uncharacterized protein;Unchar	AGO1A Os02g0672200 LOC_Os02g45070 OJ1493_H11.13;AGO1B Os04g0566500 LOC_Os04g47870 OSJNBa0005N02.3;AGO1D Os06g0729300 LOC_Os06g51310 OSJNBa0069C14.10-1;Os02g0672200 OSNPB_020672200;Os04g0566500 OSNPB_040566500;OsI_08429;OsI_17011;OsI_24539;OsJ_07892;OsJ_15809;OsJ_22736	1.9911	0.373901	up	1.99357	1	8753700	0	0	0	0	0	3.9807	1	1	1	1	1
489	B8AGR5;A0A0E0GBF6;Q6ZHC3;A0A0P0VEM7;B8AHE5;Q6Z2Y0;A0A0E0G0Z1	B8AGR5;A0A0E0GBF6;Q6ZHC3	Uncharacterized protein;Uncharacterized protein;Os02g0686400 protein	OJ1679_B08.8-1 OsJ_05322;Os02g0139600 OSNPB_020139600;Os02g0686400 Os02g0686400 OJ1717_A09.34 OsJ_07966 OSNPB_020686400;OsI_05793;OsI_08509	1.24418	0.210853	up	8.50672	8.19152	994870000	235430000	265100000	110390000	130540000	120010000	8.92661	8.2711	8.32245	8.15492	8.2349	8.18476
491	Q8GU75;B8AGT9;A0A0E0GBJ6	Q8GU75;B8AGT9;A0A0E0GBJ6	MDR-like ABC transporter;Uncharacterized protein;Uncharacterized protein	mdr11 OJ1148_D05.31-1 P0017H11.19-1 Os02g0693700 OsJ_08005 OSNPB_020693700;OsI_08549	4.40448	0.004147	up	3.13897	1	2840900	1559300	5256800	0	0	0	2.77869	2.77331	3.86491	1	1	1
493	Q6Z8F7;A2X8L0;A0A0E0GBN4	Q6Z8F7;A2X8L0;A0A0E0GBN4	26S proteosome regulatory subunit-like;Uncharacterized protein;Uncharacterized protein	Os02g0697600 Os02g0697600 OsJ_08029 OSNPB_020697600 P0459B01.7;OsI_08571	2.03931	0.373901	up	2.02808	1	0	15343000	0	0	0	0	1	4.08425	1	1	1	1
494	Q8GRU9;Q6Z8F4;A0A0E0GBN6	Q8GRU9;Q6Z8F4;A0A0E0GBN6	Phosphoribulokinase;Phosphoribulokinase;Phosphoribulokinase	Os02g0698000 OsJ_08032 OSNPB_020698000 P0459B01.11;OsI_08574	106.947	1.15575e-10	up	7.74075	1	80489000	86636000	78802000	0	0	0	7.71833	7.76684	7.73709	1	1	1
496	A0A0E0GBX4;A0A0E0GBX3;Q8S3Q8;A0A0E0GBX1;Q6YV37;B8AH99;A0A0P0VNL6;A0A0P0VNJ2	A0A0E0GBX4;A0A0E0GBX3;Q8S3Q8;A0A0E0GBX1;Q6YV37;B8AH99;A0A0P0VNL6;A0A0P0VNJ2	Uncharacterized protein;Uncharacterized protein;Putative AAA-type ATPase;Uncharacterized protein;AAA-type ATPase-like;Uncharacterized protein;Os02g0706500 protein;Os02g0697600 protein (Fragment)	49D11.23;Os02g0697600 OSNPB_020697600;Os02g0706500 OSNPB_020706500;OsI_08625;P0680A05.31-1 Os02g0706500 OsJ_08089 OSJNBb0060O16.5-1 OSNPB_020706500	5.12959	0.353331	up	7.84468	5.48584	136420000	78628000	85749000	21248000	68482000	0	8.01515	7.73119	7.7877	7.50151	7.956	1
497	Q8S3R2;A2X8R9;A0A0E0GBX9;A0A0N7KFY7	Q8S3R2;A2X8R9;A0A0E0GBX9;A0A0N7KFY7	Monodehydroascorbate reductase 2, peroxisomal;Uncharacterized protein;Uncharacterized protein;Os02g0707100 protein (Fragment)	MDAR2 MDHAR2 Os02g0707100 LOC_Os02g47800 49D11.20a OsJ_35954 P0680A05.39;Os02g0707100 OSNPB_020707100;OsI_08631	193.336	5.15221e-10	up	8.59497	1	447720000	524320000	487620000	0	0	0	8.55371	8.63368	8.59752	1	1	1
498	Q8S3R9;B8AHA3;Q6YV21;A0A0E0GBY6	Q8S3R9;B8AHA3;Q6YV21;A0A0E0GBY6	Putative uridine kinase;Uncharacterized protein;Os02g0708200 protein;Uncharacterized protein	49D11.13 OsJ_08094;Os02g0708200 Os02g0708200 OSJNBb0060O16.26 OSNPB_020708200;OsI_08637	3.95028	0.116156	up	2.98196	1	0	7984000	10060000	0	0	0	1	3.94344	4.00243	1	1	1
499	Q8S3S1;B8AHA5;A0A0E0GBZ0	Q8S3S1;B8AHA5;A0A0E0GBZ0	Os02g0708400 protein;Uncharacterized protein;Uncharacterized protein	49D11.11 Os02g0708400 OsJ_08096 OSJNBb0060O16.28 OSNPB_020708400;OsI_08639	1.98419	0.373901	up	1.98855	1	0	0	8847800	0	0	0	1	1	3.96565	1	1	1
502	Q6ZFU6;B8AHL2;A0A0E0GC39	Q6ZFU6;B8AHL2;A0A0E0GC39	Thioredoxin reductase NTRB;Thioredoxin reductase;Thioredoxin reductase	NTRB Os02g0713400 LOC_Os02g48290 OJ1479_B12.9 OsJ_08126;OsI_08672	1.22289	0.373901	up	1.29029	1	1679800	0	0	0	0	0	1.87088	1	1	1	1	1
503	A0A0E0GC47;Q6ZFT9;B8AHL5;A0A0E0HQ31;Q69T78;A0A0E0HQ32;Q0DCI1;B8B1A6	A0A0E0GC47;Q6ZFT9;B8AHL5;A0A0E0HQ31;Q69T78	Pyrophosphate--fructose 6-phosphate 1-phosphotransferase subunit alpha;Pyrophosphate--fructose 6-phosphate 1-phosphotransferase subunit alpha;Pyrophosphate--fructose 6-phosphate 1-phosphotransferase subunit alpha;Pyrophosphate--fructose 6-phosphate 1-phosp	Os02g0714200 PFP-ALPHA Os02g0714200 OJ1479_B12.23 OsJ_08132 OSNPB_020714200;Os06g0326400 PFP-ALPHA Os06g0326400 OsJ_21179 OSNPB_060326400;P0652D10.35 PFP-ALPHA;PFP-ALPHA;PFP-ALPHA OsI_08678;PFP-ALPHA OsI_22776	7.99492	6.33986e-09	up	3.99908	1	8238900	11525000	9950800	0	0	0	3.96962	4.02885	3.99878	1	1	1
504	B9F2D1;B8AHL9;A0A0E0GC57;Q6ZHP8;A0A0E0GC56	B9F2D1;B8AHL9;A0A0E0GC57;Q6ZHP8;A0A0E0GC56	Uncharacterized protein;Uncharacterized protein;Uncharacterized protein;Os02g0715200 protein;Uncharacterized protein	Os02g0715200 OJ1191_G08.12 OSNPB_020715200;OsI_08687;OsJ_08140	8.41452	2.84921e-09	up	4.07288	1	15120000	12607000	14227000	0	0	0	4.09421	4.0456	4.07884	1	1	1
505	Q6ZGW6;A2X8Y2;A0A0E0GC65	Q6ZGW6;A2X8Y2;A0A0E0GC65	Delta-12 fatty acid desaturase;Uncharacterized protein;Uncharacterized protein	OJ1191_G08.29-1 FAD2 Os02g0716500 OJ2056_H01.1-1 OsJ_08147 OSNPB_020716500;OsI_08694	159.302	1.11358e-08	up	8.31562	1	327630000	266050000	218370000	0	0	0	8.39671	8.31963	8.23051	1	1	1
506	Q6ZGV9;A2X8Y7;A0A0E0GC74;A6N0K5	Q6ZGV9;A2X8Y7;A0A0E0GC74	Os02g0717300 protein;Uncharacterized protein;Uncharacterized protein	Os02g0717300 OJ1191_G08.41 OJ2056_H01.13 OsJ_08152 OSNPB_020717300;OsI_08700	108.54	4.43296e-08	up	7.76208	1	105370000	80553000	68736000	0	0	0	7.88062	7.73827	7.66736	1	1	1
507	A0A0E0GC75;Q6ZGV8;B8AHM3;B9F2D5	A0A0E0GC75;Q6ZGV8;B8AHM3;B9F2D5	Uncharacterized protein;Clustered mitochondria protein homolog;Clustered mitochondria protein homolog;Uncharacterized protein	Os02g0717400 OJ1191_G08.42 OJ2056_H01.14 OSNPB_020717400;OsI_08701;OsJ_08153	1.97098	0.373901	up	1.97891	1	0	0	7722500	0	0	0	1	1	3.93674	1	1	1
508	Q0DY33;P31691;B8AHM8;A0A0E0GC86;A6N038	Q0DY33;P31691;B8AHM8;A0A0E0GC86	ATP/ADP translocator;ADP,ATP carrier protein, mitochondrial;Uncharacterized protein;Uncharacterized protein	Os02g0718900 LOC_Os02g48720 OJ2056_H01.33;Os02g0718900 OsJ_08162;OsI_08713	1.49655	1.61447e-05	up	9.95052	9.36888	11462000000	11281000000	12131000000	1866300000	1785500000	1988000000	9.95001	9.96931	9.93225	9.35397	9.34223	9.41045
509	Q6Z670;A0A0N7KG02;Q6Z671;A2X915;A0A0E0GCA6;B9F2E7	Q6Z670;A0A0N7KG02;Q6Z671;A2X915;A0A0E0GCA6;B9F2E7	Putative chloroplast nucleoid DNA-binding protein cnd41;Os02g0720900 protein (Fragment);Os02g0720900 protein;Uncharacterized protein;Uncharacterized protein;Uncharacterized protein	Os02g0720900 OSNPB_020720900;OsI_08729;OsJ_08178;P0654B04.7-1 OJ1008_D06.22-1 Os02g0720900 OSNPB_020720900;P0654B04.7-2 OJ1008_D06.22-2	105.038	5.04729e-09	up	7.71477	1	64181000	82830000	80744000	0	0	0	7.64246	7.74952	7.75233	1	1	1
510	Q6Z7Q1;B8AJ38;A0A0E0GCB8	Q6Z7Q1;B8AJ38;A0A0E0GCB8	Chlorophyll a-b binding protein, chloroplastic;Chlorophyll a-b binding protein, chloroplastic;Chlorophyll a-b binding protein, chloroplastic	Os02g0764500 OsJ_08493 OSNPB_020764500 P0539D10.17;OsI_09055	66.9387	0.000220078	up	7.06477	1	31532000	30939000	87604000	0	0	0	7.22362	6.17103	7.79966	1	1	1
512	Q6ZGJ7;A3ABR0;Q6ZGJ8;A2XA10;A0A0E0GCE8;Q0DX85	Q6ZGJ7;A3ABR0;Q6ZGJ8;A2XA10;A0A0E0GCE8;Q0DX85	Putative inorganic pyrophosphatase;Uncharacterized protein;Os02g0768600 protein;Uncharacterized protein;Uncharacterized protein;Os02g0768600 protein (Fragment)	OJ1767_D02.15-1;OJ1767_D02.15-2 Os02g0768600 OSNPB_020768600;Os02g0768600 Os02g0768600 OSNPB_020768600;OsI_09082;OsJ_08520	4.32839	0.373901	up	3.11383	1	0	38267000	0	0	0	0	1	7.34149	1	1	1	1
517	A0A0E0GCR6;Q6Z2K0;B8AI21;A0A0E0GCR5	A0A0E0GCR6;Q6Z2K0;B8AI21;A0A0E0GCR5	Uncharacterized protein;Os02g0732500 protein;Uncharacterized protein;Uncharacterized protein	Os02g0732500 OsJ_08274 OSNPB_020732500 P0643A10.22;OsI_08819	39.4429	0.00761124	up	6.30169	1	21684000	49885000	31436000	0	0	0	4.17755	7.50391	7.22362	1	1	1
520	A0A0E0GCY3;Q6Z697;B8AIT1;A0A0E0GCY2	A0A0E0GCY3;Q6Z697;B8AIT1;A0A0E0GCY2	Uncharacterized protein;Os02g0754500 protein;Uncharacterized protein;Uncharacterized protein	Os02g0754500 Os02g0754500 OsJ_08425 OSNPB_020754500 P0627E03.16;OsI_08982	4.13435	0.116155	up	3.04766	1	12115000	16356000	0	0	0	0	4.04122	4.10176	1	1	1	1
521	A0A0E0GD31;A3BEL8;Q653V4;A2YG59	A0A0E0GD31;A3BEL8;Q653V4;A2YG59	Uncharacterized protein;Uncharacterized protein;Os06g0676700 protein;Uncharacterized protein	B1153E06.13-1 P0710B08.7-1 Os06g0676700 OSNPB_060676700;OsI_24149;OsJ_22352	3.91806	0.117138	up	2.97014	1	4644200	0	16092000	0	0	0	3.80541	1	4.10501	1	1	1
524	Q6K8D4;A2X9U8;A0A0E0GD93	Q6K8D4;A2X9U8;A0A0E0GD93	Peptidylprolyl isomerase;Peptidylprolyl isomerase;Peptidylprolyl isomerase	Os02g0760300 Os02g0760300 OJ1175_B01.15 OsJ_08466 OSNPB_020760300;OsI_09019	8.32776	0.159354	up	4.05793	1	11950000	0	30123000	0	0	0	4.03798	1	7.1358	1	1	1
526	Q6Z6G8;A3ABM0;A2X9W5;A2X9W4;A0A0E0GDB6;A0A0E0GDB4	Q6Z6G8;A3ABM0;A2X9W5;A2X9W4;A0A0E0GDB6;A0A0E0GDB4	4-hydroxy-4-methyl-2-oxoglutarate aldolase;4-hydroxy-4-methyl-2-oxoglutarate aldolase;4-hydroxy-4-methyl-2-oxoglutarate aldolase;4-hydroxy-4-methyl-2-oxoglutarate aldolase;4-hydroxy-4-methyl-2-oxoglutarate aldolase;4-hydroxy-4-methyl-2-oxoglutarate aldolas	Os02g0762100 OSNPB_020762100 P0486G03.14;OsI_09035;OsI_09036;OsJ_08480	3.96115	0.116154	up	2.98592	1	10060000	0	8241600	0	0	0	4.00777	1	3.94998	1	1	1
527	Q6Z6F7;B8AIV6;A0A0E0GDC6	Q6Z6F7;B8AIV6;A0A0E0GDC6	Os02g0763200 protein;Uncharacterized protein;Uncharacterized protein	Os02g0763200 Os02g0763200 OSNPB_020763200 P0486G03.32 P0539D10.8;OsI_09044	2.02054	0.373901	up	2.01474	1	0	12592000	0	0	0	0	1	4.04423	1	1	1	1
529	A6N137;Q0DWZ7;P0DKK0;P0DKJ9;A2XAB9;A0A0E0GDS7	A6N137;Q0DWZ7;P0DKK0;P0DKJ9;A2XAB9;A0A0E0GDS7	26S protease regulatory subunit 7 (Fragment);Os02g0784700 protein (Fragment);26S proteasome regulatory subunit 7B;26S proteasome regulatory subunit 7A;Uncharacterized protein;Uncharacterized protein	Os02g0784700;OsI_09197 OsI_21990;RPT1A Os02g0784700 LOC_Os02g54340 OJ1715_H01.26;RPT1B Os06g0192600 LOC_Os06g09290 OsJ_20424 OSJNBa0090D06.53 P0698A06.13	2.01826	0.373901	up	2.01311	1	12003000	0	0	0	0	0	4.03933	1	1	1	1	1
530	A0A0E0GDU9;Q6K4P5;A2XAE1;A3AC42	A0A0E0GDU9;Q6K4P5;A2XAE1;A3AC42	Diacylglycerol kinase;Diacylglycerol kinase;Diacylglycerol kinase;Diacylglycerol kinase	Os02g0787800 Os02g0787800 OSJNBa0054K20.17 OSNPB_020787800;OsI_09221;OsJ_08661	19.3184	0.116117	up	5.2719	1	41104000	41607000	0	0	0	0	7.41099	7.40472	1	1	1	1
531	Q6K4N6;A0A0E0GDV5;A3AC49;A2XAE7	Q6K4N6;A0A0E0GDV5;A3AC49;A2XAE7	Amino acid transporter-like;Uncharacterized protein;Uncharacterized protein;Uncharacterized protein	Os02g0788800 OJ1046_F07.2-1 OSJNBa0054K20.28-1 OSNPB_020788800;OsI_09226;OsJ_08666	4.06022	0.116117	up	3.02156	1	11686000	11774000	0	0	0	0	4.03176	4.03292	1	1	1	1
532	Q6K4M9;A2XAF1;A0A0E0GDW1;A3AC52;B8AIW2;Q6ETM2;A0A0E0G2G8	Q6K4M9;A2XAF1;A0A0E0GDW1;A3AC52;B8AIW2;Q6ETM2;A0A0E0G2G8	Os02g0789600 protein;Uncharacterized protein;Uncharacterized protein;Uncharacterized protein;Uncharacterized protein;Os02g0178500 protein;Uncharacterized protein	Os02g0178500 OsJ_05609 OSNPB_020178500 P0544B02.5;Os02g0789600 Os02g0789600 OJ1046_F07.10 OSJNBa0054K20.36 OSNPB_020789600;OsI_06085;OsI_09230;OsJ_08669	2.0529	0.373901	up	2.03767	1	16463000	0	0	0	0	0	4.113	1	1	1	1	1
535	Q6K669;A2XAI5;A0A0E0GE00;A6N1P7;A2ZK22;A0A0E0J9P5	Q6K669;A2XAI5;A0A0E0GE00	Leucine aminopeptidase 2, chloroplastic;Uncharacterized protein;Uncharacterized protein	Os02g0794700 LOC_Os02g55140 OJ1695_H09.4 P0700F06.36;OsI_09267;OsI_38175	19.5368	0.15317	up	7.72265	3.43453	57793000	74123000	105950000	0	0	156990000	7.58856	7.69417	7.88522	1	1	8.30358
536	A0A0N7KG92;Q0DWT3;B8AEH2;B9F414;A0A0E0GE26;Q6KAK1	A0A0N7KG92;Q0DWT3;B8AEH2;B9F414;A0A0E0GE26;Q6KAK1	Os02g0796700 protein;Os02g0796700 protein (Fragment);Uncharacterized protein;Uncharacterized protein;Uncharacterized protein;Protein kinase-like	OJ1004_E04.19;Os02g0796700;Os02g0796700 OSNPB_020796700;OsI_09285;OsJ_08723	1.22888	0.373901	up	1.29734	1	2249900	0	0	0	0	0	1.89203	1	1	1	1	1
537	Q84V24;Q6KAJ2;B8AEH4;A0A0E0GE32	Q84V24;Q6KAJ2;B8AEH4;A0A0E0GE32	Aspartate aminotransferase (Fragment);Aspartate aminotransferase;Aspartate aminotransferase;Aspartate aminotransferase	Os02g0797500 OJ1004_E04.34 OsJ_08730 OSNPB_020797500;OsI_09291	83.6294	3.40125e-10	up	7.38594	1	40845000	38769000	41054000	0	0	0	7.40472	7.35092	7.40217	1	1	1
539	A0A0P0VQS0;Q69QY7;A3ACC3;A2XAM7;A0A0E0GE58	A0A0P0VQS0;Q69QY7;A3ACC3;A2XAM7;A0A0E0GE58	Os02g0799300 protein (Fragment);Os02g0799300 protein;Uncharacterized protein;Uncharacterized protein;Uncharacterized protein	Os02g0799300 OJ1695_D07.22 OSNPB_020799300;Os02g0799300 OSNPB_020799300;OsI_09307;OsJ_08742	7.99044	2.72881e-06	up	3.99827	1	12162000	5103200	16152000	0	0	0	4.04264	3.84666	4.10552	1	1	1
541	Q69SJ7;B8AEE3;A0A0E0GE75	Q69SJ7;B8AEE3;A0A0E0GE75	Os02g0803200 protein;Uncharacterized protein;Uncharacterized protein	Os02g0803200 OSNPB_020803200 P0689B12.23;OsI_09325	7.93902	1.39258e-09	up	3.98896	1	8012400	10342000	9995200	0	0	0	3.96565	3.99966	4.00156	1	1	1
542	Q6K850;A0A0E0GE88;B9F438;A2XAQ5	Q6K850;A0A0E0GE88;B9F438;A2XAQ5	Os02g0804500 protein;Uncharacterized protein;Uncharacterized protein;Uncharacterized protein	Os02g0804500 OJ1548_F12.8 OSNPB_020804500;OsI_09337;OsJ_08771	4.08352	0.546081	up	5.25716	3.22735	46887000	0	33093000	32787000	0	0	7.49913	1	7.27234	7.68204	1	1
543	Q10MN2;A2XFQ8;A0A0E0GEB0	Q10MN2;A2XFQ8;A0A0E0GEB0	Peroxisomal membrane protein 11-3;Peroxisomal membrane protein 11-3;Uncharacterized protein	PEX11-3 Os03g0302000 LOC_Os03g19010 OsJ_010110;PEX11-3 OsI_010901	10.9409	0.13049	up	4.45166	1	0	31924000	28843000	0	0	0	1	7.16884	5.18615	1	1	1
544	A0A0E0GES2;Q6K8N9;A2XAY6;A0A0E0GES1	A0A0E0GES2;Q6K8N9;A2XAY6;A0A0E0GES1	Uncharacterized protein;Glutathione S-transferase C-terminal domain-containing protein-like;Uncharacterized protein;Uncharacterized protein	Os02g0814800 Os02g0814800 OJ1293_E04.24 OsJ_08853 OSNPB_020814800;OsI_09418	2.033	0.373901	up	2.02361	1	0	0	13666000	0	0	0	1	1	4.07083	1	1	1
545	Q6K6C4;A2XAZ0;A0A0E0GES5	Q6K6C4;A2XAZ0;A0A0E0GES5	Os02g0815200 protein;Uncharacterized protein;Uncharacterized protein	Os02g0815200 Os02g0815200 OJ1293_E04.28 OsJ_08857 OSNPB_020815200 P0643F09.1;OsI_09422	6.92151	1.92782e-09	up	3.79109	1	4406600	4042100	3538600	0	0	0	3.76764	3.80021	3.80541	1	1	1
547	Q0DWH1;A2XAZ3;A0A0E0GES8	Q0DWH1;A2XAZ3;A0A0E0GES8	Alcohol dehydrogenase class-3;Alcohol dehydrogenase class-3;S-(hydroxymethyl)glutathione dehydrogenase	ADHIII OsI_009236;Os02g0815500 LOC_Os02g57040 OsJ_008550 P0643F09.4	2.01153	0.373901	up	2.00829	1	0	11381000	0	0	0	0	1	4.02488	1	1	1	1
548	B9F475;Q0DWG3;Q6K6B1;A0A0E0GET9;B8AEU1	B9F475;Q0DWG3;Q6K6B1;A0A0E0GET9;B8AEU1	Uncharacterized protein;Os02g0816300 protein;CLIP-associating protein-like;Uncharacterized protein;Uncharacterized protein	Os02g0816300 Os02g0816300 OSNPB_020816300;OsI_09437;OsJ_08868;P0643F09.16	4.02237	0.116268	up	3.00805	1	0	14277000	8405500	0	0	0	1	4.07083	3.95331	1	1	1
550	B7ESX6;Q6K6A4;B8AEU4;A0A0E0GEU7;B9F477;C7IYD9;A0A0P0VQZ7;B9F424;B8AEE0;A0A0P0VQR4;A0A0E0GQ08;Q0DWQ7;A0A0E0GQ09;A0A0E0GQ11	B7ESX6;Q6K6A4;B8AEU4;A0A0E0GEU7;B9F477	cDNA clone:J033089A08, full insert sequence;Os02g0816800 protein;Uncharacterized protein;Uncharacterized protein;Uncharacterized protein	CYCB1-2 Os02g0801300 LOC_Os02g55720;Os02g0800500 OSNPB_020800500;Os02g0800550;Os02g0801200 Os02g0800500 Os02g0801300 OSNPB_020800500 OSNPB_020801200 OSNPB_020801300;Os02g0816800 OJ1136_C12.3 OSNPB_020816800 P0643F09.23;OsI_09314;OsI_09443;OsJ_08746;OsJ_08874	8.60832	0.294076	up	9.25273	6.147	1797100000	2209100000	2534800000	404300000	432720000	0	9.15446	9.27954	9.32419	8.70143	8.73956	1
551	Q40648;B8AEU9;A0A0E0GEV5	Q40648;B8AEU9;A0A0E0GEV5	Probable voltage-gated potassium channel subunit beta;Uncharacterized protein;Uncharacterized protein	KOB1 Os02g0817500 LOC_Os02g57240 OJ1136_C12.15 P0643F09.35;OsI_09450	8.64874	2.47774e-08	up	4.11249	1	20163000	16210000	14080000	0	0	0	4.16078	4.09924	4.07744	1	1	1
552	B8AEV1;B9F483;Q0DWE8;A0A0E0GEW3;A0A0E0GEW2;A0A0E0GEW1	B8AEV1;B9F483;Q0DWE8;A0A0E0GEW3;A0A0E0GEW2;A0A0E0GEW1	Uncharacterized protein;Uncharacterized protein;Os02g0817900 protein;Uncharacterized protein;Uncharacterized protein;Uncharacterized protein	Os02g0817900 Os02g0817900 OSNPB_020817900;OsI_09455;OsJ_08883	3.82444	0.116163	up	2.93525	1	5431500	7612800	0	0	0	0	3.87142	3.93433	1	1	1	1
556	Q9SXF8;A2XB64;A0A0E0GF26	Q9SXF8;A2XB64;A0A0E0GF26	Aquaporin PIP 1-3;Uncharacterized protein;Uncharacterized protein	OsI_09504;PIP1-3 RWC3 Os02g0823100 LOC_Os02g57720 OJ1136_C04.6 OsJ_008613	1.3001	0.00270789	up	8.13128	7.75267	194240000	197240000	142360000	34188000	42806000	39885000	8.18476	8.1785	8.0306	7.69885	7.77302	7.78614
557	A0A0P0VRN4;Q6K7R5;A0A0P0VRI3;B8AF60;B9F4M2;A0A0E0GF72;A0A0E0GF73;C7IY64;Q6K7R4	A0A0P0VRN4;Q6K7R5;A0A0P0VRI3;B8AF60;B9F4M2;A0A0E0GF72;A0A0E0GF73;C7IY64;Q6K7R4	Os02g0826500 protein (Fragment);Putative non-transporter ABC protein AbcF1;Os02g0826500 protein (Fragment);Uncharacterized protein;Uncharacterized protein;Uncharacterized protein;Uncharacterized protein;Os02g0826500 protein (Fragment);Os02g0826500 protein	Os02g0826500;Os02g0826500 OSNPB_020826500;OsI_09528;OsJ_08959;P0452F04.18-1 Os02g0826500 OSNPB_020826500;P0452F04.18-2	11.1628	0.130793	up	4.48062	1	29135000	0	31623000	0	0	0	5.21065	1	7.23122	1	1	1
558	A0A0P0VRN6;A0A0N7KGD8;Q6K9T1;B9F4N9;A0A0E0GFB3;A0A0E0GFB4;B8AF81	A0A0P0VRN6;A0A0N7KGD8;Q6K9T1;B9F4N9;A0A0E0GFB3;A0A0E0GFB4;B8AF81	Os02g0830100 protein (Fragment);Os02g0830100 protein;Oligopeptidase A-like;Uncharacterized protein;Uncharacterized protein;Uncharacterized protein;Uncharacterized protein	Os02g0830100 Os02g0830100 OJ1124_D06.18 OSNPB_020830100;Os02g0830100 OSNPB_020830100;OsI_09551;OsJ_08986	8.3004	1.42125e-07	up	4.05318	1	11719000	10395000	17778000	0	0	0	4.03253	4.00037	4.12665	1	1	1
559	B9F4P4;A0A0E0GFC7;Q6K973	B9F4P4;A0A0E0GFC7;Q6K973	Sucrose synthase;Sucrose synthase;Sucrose synthase 6	OsJ_08997;SUS6 Os02g0831500 LOC_Os02g58480 OJ1149_C12.12-1	1.98022	0.373901	up	1.98566	1	0	0	8521600	0	0	0	1	1	3.95698	1	1	1
560	Q6K965;B8AFI8;A0A0E0GFD6;A0A0E0GFD4;A0A0E0GFD5;A0A0E0GFD3	Q6K965;B8AFI8;A0A0E0GFD6;A0A0E0GFD4;A0A0E0GFD5;A0A0E0GFD3	Outer envelope pore protein 21, chloroplastic;Outer envelope pore protein 21, chloroplastic;Uncharacterized protein;Uncharacterized protein;Uncharacterized protein;Uncharacterized protein	OEP21 Os02g0832200 LOC_Os02g58550 OJ1149_C12.21 OsJ_09004;OEP21 OsI_09575	2.8822	0.130419	up	2.52717	1	4302900	3178600	0	0	0	0	3.72826	2.85325	1	1	1	1
561	A0A0E0GFF2;A0A0E0GFF3;A0A0E0GFF0;A0A0E0GFE9;A0A0E0GFF4;A0A0E0GFF1;A0A0E0GFE8;B9F4Q1;B8AFJ2;A0A0E0GFE7	A0A0E0GFF2;A0A0E0GFF3;A0A0E0GFF0;A0A0E0GFE9;A0A0E0GFF4;A0A0E0GFF1;A0A0E0GFE8;B9F4Q1;B8AFJ2;A0A0E0GFE7	Protein DETOXIFICATION;Protein DETOXIFICATION;Protein DETOXIFICATION;Protein DETOXIFICATION;Protein DETOXIFICATION;Protein DETOXIFICATION;Protein DETOXIFICATION;Protein DETOXIFICATION;Protein DETOXIFICATION;Protein DETOXIFICATION	OsI_09581;OsJ_09011	1.93736	0.373901	up	1.95409	1	5264100	0	0	0	0	0	3.86228	1	1	1	1	1
568	A6N0D0;Q650W6;B8BEL6;A0A0E0GFT4	A6N0D0;Q650W6;B8BEL6;A0A0E0GFT4	Chloroplast 28 kDa ribonucleoprotein (Fragment);Os09g0565200 protein;Uncharacterized protein;Uncharacterized protein	Os09g0565200 Os09g0565200 OsJ_30367 OSJNBa0042B15.31 OSJNBa0070E11.5 OSNPB_090565200;OsI_32419	1.95574	0.373901	up	1.96772	1	0	0	6428500	0	0	0	1	1	3.90315	1	1	1
569	B8ALG6;Q8H7U1;A0A0E0GFV4;B9FAB5;Q76FS3;A0A0E0HEF9;Q43594;A2WNJ7;A0A0E0FK81;A2ZRW5;A0A0E0FK80;B9FIN1;B8AY97;Q0DVZ5;Q0E4V5	B8ALG6;Q8H7U1;A0A0E0GFV4;B9FAB5;Q76FS3;A0A0E0HEF9;Q43594;A2WNJ7;A0A0E0FK81;A2ZRW5;A0A0E0FK80;B9FIN1;B8AY97	Tubulin beta chain;Tubulin beta-2 chain;Tubulin beta chain;Tubulin beta chain;Tubulin beta-6 chain;Tubulin beta chain;Tubulin beta-1 chain;Tubulin beta chain;Tubulin beta chain;Tubulin beta chain;Uncharacterized protein;Uncharacterized protein;Uncharacteri	Os03g0105600;OsI_01426;OsI_09642;OsI_19960;OsJ_01331;OsJ_09084;OsJ_18543;tub6;TUBB1 OSTB-34 TUB1 Os01g0282800 LOC_Os01g18050 OSJNBa0004B13.5 P0581F09.13;TUBB2 TUB2 Os03g0105600 LOC_Os03g01530 OSJNBa0009C08.10;TUBB6 TUB6 Os05g0413200 LOC_Os05g34170 P0017D10.10	8.83084	0.154095	up	4.14255	1	0	29493000	30923000	0	0	0	1	4.22682	7.20083	1	1	1
570	Q10SS5;Q10SS6;B9FAE7;A0A0E0GFX7;B8ALH0;Q0DVU5	Q10SS5;Q10SS6;B9FAE7;A0A0E0GFX7;B8ALH0	AP-2 complex subunit alpha;AP-2 complex subunit alpha;AP-2 complex subunit alpha;AP-2 complex subunit alpha;Uncharacterized protein	LOC_Os03g02150;Os03g0112400 OSNPB_030112400;OsI_09703;OsJ_09142	4.00604	0.116489	up	3.00218	1	6361000	15892000	0	0	0	0	3.91135	4.09518	1	1	1	1
572	Q9ZST0;A2XBY3;A0A0E0GG46;B9FAU8	Q9ZST0;A2XBY3;A0A0E0GG46	50S ribosomal protein L5, chloroplastic;Uncharacterized protein;Uncharacterized protein	OsI_09799;OsJ_09237;RPL5 Os03g0125000 LOC_Os03g03360	191.736	7.29867e-07	up	8.58298	1	267960000	603940000	701160000	0	0	0	8.30201	8.69142	8.7555	1	1	1
573	A3ADQ4;Q8S5V0;A0A0E0GG72	A3ADQ4;Q8S5V0;A0A0E0GG72	Uncharacterized protein;Fasciclin-like arabinogalactan protein 8, putative, expressed;Uncharacterized protein	Os03g0128000 LOC_Os03g03600 OJ1015F07.17 OSNPB_030128000;OsJ_09260	3.9968	0.116137	up	2.99885	1	0	9260500	10690000	0	0	0	1	3.97655	4.01998	1	1	1
578	A0A0E0GGB1;Q9ZRI9;Q10S82;B8AME2;Q9ZWH7;Q45RE7;Q10S81	A0A0E0GGB1;Q9ZRI9;Q10S82;B8AME2;Q9ZWH7;Q45RE7	Catalase;Catalase;Catalase;Catalase;Catalase;Catalase-C	CatC;LOC_Os03g03910;Os03g0131200 LOC_Os03g03910 Os03g0131200 OsJ_09293 OSNPB_030131200;oscatc;OsI_09857	1.29649	3.84421e-05	up	9.97677	9.60216	11934000000	11277000000	12525000000	3181800000	3034300000	3050800000	10.011	9.95001	9.96931	9.5963	9.5963	9.61389
579	Q10S76;B8AME5;A0A0E0GGB5	Q10S76;B8AME5;A0A0E0GGB5	Expressed protein;Uncharacterized protein;Uncharacterized protein	Os03g0131500 LOC_Os03g03949 Os03g0131500 OSNPB_030131500;OsI_09860	2.01763	0.373901	up	2.01266	1	0	0	11617000	0	0	0	1	1	4.03798	1	1	1
580	Q10S72;A0A0E0GGB9;A2XC42	Q10S72;A0A0E0GGB9;A2XC42	4-coumarate--CoA ligase-like 4;Uncharacterized protein;Uncharacterized protein	4CLL4 Os03g0132000 LOC_Os03g04000 OsJ_09299;OsI_09863	4.16815	0.116117	up	3.05941	1	0	15782000	14617000	0	0	0	1	4.09328	4.08494	1	1	1
581	Q6QN20;Q8H8D6;A2XC62;A0A0E0GGE1	Q6QN20;Q8H8D6;A2XC62;A0A0E0GGE1	Glutathione S-transferase GSTF14 (Fragment);Glutathione S-transferase, N-terminal domain containing protein, expressed;Uncharacterized protein;Uncharacterized protein	LOC_Os03g04220 Os03g0134900 OJ1006F06.9 OsJ_09310 OSNPB_030134900;OsI_09885	4.13068	0.116175	up	3.04638	1	0	11716000	16344000	0	0	0	1	4.03227	4.10686	1	1	1
582	Q8H8D9;Q10S49;A2XC68;A0A0E0GGE3;Q8H8D8;A2XC67;A0A0E0GGE2	Q8H8D9;Q10S49;A2XC68;A0A0E0GGE3;Q8H8D8;A2XC67;A0A0E0GGE2	Putative glutathione S-transferase;Glutathione S-transferase, C-terminal domain containing protein, expressed;Uncharacterized protein;Uncharacterized protein;Glutathione S-transferase GSTF15;Uncharacterized protein;Uncharacterized protein	LOC_Os03g04250 OsJ_09312;OJ1006F06.6;Os03g0135100 LOC_Os03g04240 Os03g0135100 OJ1006F06.7 OsJ_09311 OSNPB_030135100;OsI_09891;OsI_09892	4.40587	0.116117	up	3.13943	1	25646000	27260000	0	0	0	0	4.2108	4.20748	1	1	1	1
583	A2XC88;Q10S41;O82427;A0A0E0GGF5	A2XC88;Q10S41;O82427;A0A0E0GGF5	Methyltransferase;Methyltransferase;24-methylenesterol C-methyltransferase 2;Methyltransferase	ArsM1 LOC_Os03g04340 Os03g0136200 OsJ_09320;OsI_09914;Smt2-1 Os03g0136200 LOC_Os03g04340	11.4737	0.000495041	up	4.52026	1	23015000	30250000	21813000	0	0	0	4.18992	5.20153	4.16932	1	1	1
584	A2XIG6;Q850W6;A0A0E0GGH3;Q84SS7;Q10IJ6	A2XIG6;Q850W6;A0A0E0GGH3;Q84SS7;Q10IJ6	Uncharacterized protein;Os03g0452300 protein;Uncharacterized protein;Putative ribosomal protein S5;Ribosomal protein S5 containing protein, expressed	LOC_Os03g34040;LOC_Os03g34040 Os03g0452300 OsJ_11420 OSJNBa0037J17.7 OSNPB_030452300;OsI_12226;OSJNBb0047D08.4	168.651	1.2763e-09	up	8.3979	1	375270000	289790000	298050000	0	0	0	8.4544	8.36894	8.37036	1	1	1
585	B9FAY8;Q10S34;B8AMU2;A0A0E0GGI0;A0A0P0VSS6	B9FAY8;Q10S34;B8AMU2;A0A0E0GGI0	Aconitate hydratase;Aconitate hydratase;Aconitate hydratase;Aconitate hydratase	LOC_Os03g04410 Os03g0136900 OSNPB_030136900;Os03g0136900 OSNPB_030136900;OsI_09921;OsJ_09326	1.06419	0.719542	up	8.71703	8.62727	512450000	969880000	524760000	126460000	596350000	489390000	8.60066	8.89449	8.65594	8.20254	8.89449	8.78479
587	A0A0E0GGI4;Q10S27;B8AMU5;A0A0E0GGI6;B9FAZ1	A0A0E0GGI4;Q10S27;B8AMU5;A0A0E0GGI6;B9FAZ1	Uncharacterized protein;Mitochondrial outer membrane protein porin 6;Uncharacterized protein;Uncharacterized protein;Uncharacterized protein	OsI_09925;OsJ_09329;VDAC6 Os03g0137500 LOC_Os03g04460	42.4623	0.00788285	up	6.40811	1	26531000	42599000	60324000	0	0	0	4.21551	7.42026	7.58856	1	1	1
588	Q9AV87;Q10RZ3;A2XCC4;A0A0E0GGL2;A0A0E0IT66;A3C5J8;B8BHC8;A0A0P0VSV2;Q9ZSU8;A0A0P0XW06;A3CC22	Q9AV87;Q10RZ3;A2XCC4;A0A0E0GGL2;A0A0E0IT66;A3C5J8;B8BHC8;A0A0P0VSV2;Q9ZSU8	60S ribosomal protein L21, putative, expressed;60S ribosomal protein L21, putative, expressed;Uncharacterized protein;Uncharacterized protein;Uncharacterized protein;Uncharacterized protein;Uncharacterized protein;Os03g0141000 protein;60S ribosomal protein	LOC_Os03g04750 Os03g0141000 OsJ_09354;Os03g0141000 OSNPB_030141000;Os10g0465800 OSNPB_100465800;OsI_09955;OsI_33947;OsJ_31823;OsJ_34157;OSJNBa0006L06.3 LOC_Os10g32820 Os10g0465800;RPL21	24.4025	0.116117	up	5.60896	1	0	117600000	110460000	0	0	0	1	7.91138	7.91548	1	1	1
589	A3ADY7;A2XCB9;Q10RZ9;A0A0E0GGL8	A3ADY7;A2XCB9;Q10RZ9;A0A0E0GGL8	Uncharacterized protein;Uncharacterized protein;Cytochrome P450 family protein, expressed;Uncharacterized protein	LOC_Os03g04680;OsI_09950;OsJ_09350	2.05383	0.373901	up	2.03832	1	0	0	17091000	0	0	0	1	1	4.11495	1	1	1
590	Q10RW9;B8AMW6;A0A0E0GGN0	Q10RW9;B8AMW6;A0A0E0GGN0	Chaperonin;Uncharacterized protein;Uncharacterized protein	LOC_Os03g04970 Os03g0143400 OsJ_09368 OSNPB_030143400;OsI_09970	17.0114	0.0228278	up	5.08843	1	7206400	8453000	37917000	0	0	0	3.94638	3.95698	7.36194	1	1	1
591	P50156;A4ZYN4;A2XCH7;A0A0E0GGS2	P50156;A4ZYN4;A2XCH7;A0A0E0GGS2	Probable aquaporin TIP1-1;Aquaporin;Uncharacterized protein;Uncharacterized protein	AQP;OsI_10010;TIP1-1 YK333 Os03g0146100 LOC_Os03g05290 OsJ_009057 OSJNBa0067N01.16	91.458	8.34297e-08	up	7.51504	1	66962000	46375000	43244000	0	0	0	7.65512	7.46242	7.42757	1	1	1
593	Q8H6H4;A2XCK8;A0A0E0GGW2;Q8GSD9;A2XCL0;A0A0E0GGW4	Q8H6H4;A2XCK8;A0A0E0GGW2;Q8GSD9;A2XCL0;A0A0E0GGW4	Inorganic phosphate transporter 1-1;Uncharacterized protein;Uncharacterized protein;Inorganic phosphate transporter 1-2;Uncharacterized protein;Uncharacterized protein	OsI_10041;OsI_10043;PHT1-1 PT1 Os03g0150600 LOC_Os03g05620 OsJ_009086;PTH1-2 PT1 PT2 Os03g0150800 LOC_Os03g05640 OsJ_009088	1.97515	0.373901	up	1.98196	1	0	0	8179800	0	0	0	1	1	3.94589	1	1	1
594	Q7XE16;Q10RP0;A2XCL6;A0A0E0GGX3;A0A0E0ISK6;B8BH45;A0A0P0VT75;Q0IXF3;A6MZV2;B7E390;B8BAT4;A0A0E0IBS1;Q6Z562;A0A0P0XFK3	Q7XE16;Q10RP0;A2XCL6;A0A0E0GGX3;A0A0E0ISK6;B8BH45;A0A0P0VT75	Cell division cycle protein 48, putative, expressed;Cell division cycle protein 48, putative, expressed;AAA-ATPase;Uncharacterized protein;Uncharacterized protein;Uncharacterized protein;Os03g0151800 protein (Fragment)	cdc48 OsI_10049;LOC_Os10g30580 OsJ_31677;Os03g0151800 LOC_Os03g05730 Os03g0151800 OsJ_09438 OSNPB_030151800;Os03g0151800 OSNPB_030151800;Os08g0413000 OsJ_27296 OSJNBa0007M04.24;Os08g0413000 OSNPB_080413000;Os10g0442600;Os10g0442600 OSNPB_100442600;OsI_29256;OsI_33786	3.78287	0.489884	up	7.97433	6.05485	128910000	134650000	118100000	335430000	296370000	0	7.97808	7.99447	7.95043	8.60712	8.55742	1
595	Q9SSU9;Q9FPK1;Q7FYA1;Q10RN9;B8ANC8;A0A0E0GGX4	Q9SSU9;Q9FPK1;Q7FYA1;Q10RN9;B8ANC8;A0A0E0GGX4	Rab5B protein;Small GTP-binding protein RAB5B;Small GTP-binding protein RAB5B;Os03g0151900 protein;Uncharacterized protein;Uncharacterized protein	Os03g0151900 LOC_Os03g05740 Os03g0151900 OsJ_09439 OSNPB_030151900;OsI_10050;rab5B	7.23844	1.69052e-08	up	3.85568	1	5175700	4507800	6008300	0	0	0	3.8569	3.81904	3.89109	1	1	1
597	Q2R1K0;Q10RK9;A0A0E0GGZ3;Q2R1J7;Q2R1J8;A2ZFU3;A0A0E0GGZ2;A0A0P0Y445;B8ANT6;A2ZKN9;A0A0E0JAH4;A2ZKN7;A0A0E0JAH1;A0A0E0JAH6;Q0DRI8;A6N0R9;B9F8Q1;B8AQJ1;Q10KL6;A0A0E0GN01;A0A0E0GN00	Q2R1K0;Q10RK9;A0A0E0GGZ3;Q2R1J7;Q2R1J8;A2ZFU3;A0A0E0GGZ2;A0A0P0Y445;B8ANT6;A2ZKN9;A0A0E0JAH4;A2ZKN7;A0A0E0JAH1;A0A0E0JAH6	40S ribosomal protein S9, putative, expressed;40S ribosomal protein S9, putative, expressed;Uncharacterized protein;40S ribosomal protein S9, putative, expressed;40S ribosomal protein S9, putative, expressed;40S ribosomal protein S9;Uncharacterized protein	LOC_Os03g05980;LOC_Os03g05980 LOC_Os11g38949 Os03g0154700 Os11g0602600 OsJ_09456 OsJ_34422 OsJ_34424 OSNPB_030154700 OSNPB_110602600;LOC_Os03g26229;LOC_Os11g38949;Os03g0379500 Os03g0379500 OSNPB_030379500;Os11g0602500 OSNPB_110602500;OsI_10067;OsI_11808;OsI_36650 OsI_36651;OsI_38381;OsI_38384;OsJ_11053	5.50172	0.123813	up	3.45988	1	21432000	30392000	0	0	0	0	4.17463	5.20502	1	1	1	1
599	A2XCQ4;A0A0E0GH11;Q8LMR0	A2XCQ4;A0A0E0GH11;Q8LMR0	Phosphoserine aminotransferase;Phosphoserine aminotransferase;Phosphoserine aminotransferase	OJ1134F05.4 Os03g0157900 LOC_Os03g06200 OsJ_09470 OSJNBa0011L14.1 OSNPB_030157900;OsI_10089	86.9926	5.74178e-10	up	7.44282	1	41153000	47736000	43632000	0	0	0	7.41243	7.48094	7.43509	1	1	1
603	A0A0E0GHE0;Q9ZTP5;B8APA6	A0A0E0GHE0;Q9ZTP5;B8APA6	Ribulose-phosphate 3-epimerase;Ribulose-phosphate 3-epimerase, chloroplastic;Ribulose-phosphate 3-epimerase	OsI_10180;RPE RPE2 Os03g0169100 LOC_Os03g07300 OsJ_09567 OSJNBa0091P11.10	9.269	0.157979	up	4.21241	1	0	28285000	42285000	0	0	0	1	4.2189	7.41834	1	1	1
605	Q10R45;A2XD19;A0A0E0GHH2	Q10R45;A2XD19;A0A0E0GHH2	Alanine-glyoxylate aminotransferase 2, mitochondrial, putative, expressed;Uncharacterized protein;Uncharacterized protein	LOC_Os03g07570 Os03g0171900 OsJ_09593 OSNPB_030171900;OsI_10205	82.7721	1.75606e-09	up	7.37107	1	41668000	38152000	37452000	0	0	0	7.42352	7.34034	7.34936	1	1	1
609	Q10QZ6;O64937;B8APM5;A0A1L2JKK1;A0A0E0GHL3;Q10QZ4;A0A0N7KGP4;A0A0P0VTT8;Q10QZ5;A0A0E0GHL7;A0A0E0GHL8;A6N0C3;A2XD52	Q10QZ6;O64937;B8APM5;A0A1L2JKK1;A0A0E0GHL3;Q10QZ4;A0A0N7KGP4;A0A0P0VTT8;Q10QZ5;A0A0E0GHL7;A0A0E0GHL8	Elongation factor 1-alpha;Elongation factor 1-alpha;Elongation factor 1-alpha;Elongation factor 1-alpha;Elongation factor 1-alpha;Elongation factor 1-alpha;Os03g0177400 protein (Fragment);Os03g0177900 protein;Elongation factor 1-alpha;Uncharacterized prote	REFA2 Os03g0178000 LOC_Os03g08060;REFA3 Os03g0177900 LOC_Os03g08050;REFA4 Os03g0177500 LOC_Os03g08020;LOC_Os03g08010 LOC_Os03g08020 LOC_Os03g08050 Os03g0177400 Os03g0177500 Os03g0177900 Os03g0178000 OsJ_09631 OsJ_09634 OsJ_09635;LOC_Os03g08050;LOC_Os03g08060;Os03g0177400 OSNPB_030177400;Os03g0177900 OSNPB_030177900;OsI_10237 OsI_10241 OsI_10242;OsI_10238;REFA1 Os03g0177400 LOC_Os03g08010	1.29032	0.00281256	up	10.1323	9.76461	16247000000	16169000000	14597000000	4262600000	5650500000	5330400000	10.2144	10.1222	10.0605	9.71078	9.82741	9.75563
610	Q10QY8;A3AEQ7;Q8H025;A2XD60;A0A0E0GHM3	Q10QY8;A3AEQ7;Q8H025;A2XD60;A0A0E0GHM3	Hydrolase, alpha/beta fold family protein, expressed;Uncharacterized protein;Hydrolase, alpha/beta fold family protein, expressed;Uncharacterized protein;Uncharacterized protein	LOC_Os03g08100;OsI_10246;OsJ_09639;OSJNBa0050H14.5 LOC_Os03g08100 Os03g0178400 OSNPB_030178400	18.5397	0.116117	up	5.21255	1	34914000	0	35347000	0	0	0	7.32099	1	7.31666	1	1	1
614	Q10QU8;A0A0E0GNX0;Q8H3I3;Q10QU9;A2YNQ0;A2XD89;A0A0E0I3N3;A0A0E0GHS5;A0A0E0I3N2;A2XHR6;A0A0P0VYK0	Q10QU8;A0A0E0GNX0;Q8H3I3;Q10QU9;A2YNQ0;A2XD89;A0A0E0I3N3;A0A0E0GHS5;A0A0E0I3N2;A2XHR6;A0A0P0VYK0	40S ribosomal protein SA;40S ribosomal protein SA;40S ribosomal protein SA;40S ribosomal protein SA;40S ribosomal protein SA;40S ribosomal protein SA;40S ribosomal protein SA;40S ribosomal protein SA;40S ribosomal protein SA;40S ribosomal protein SA;Os03g0	B1056G08.113 Os07g0616600 OsJ_25132 OSNPB_070616600;LOC_Os03g08440;Os03g0182600 LOC_Os03g08440 OsJ_09668 OSJNBa0032G08.18 OSNPB_030182600;Os03g0402400 OSNPB_030402400;OsI_10272;OsI_11954;OsI_26872	1.0189	0.681216	up	7.74199	7.71498	93157000	67936000	81921000	30783000	37254000	39285000	7.81414	7.65076	7.76107	7.64938	7.71585	7.77971
615	Q10QL6;B8AQ47;A0A0E0GHW6	Q10QL6;B8AQ47;A0A0E0GHW6	GRIM-19 protein, expressed;Uncharacterized protein;Uncharacterized protein	LOC_Os03g09210 Os03g0192400 OsJ_09737 OSNPB_030192400;OsI_10347	1.1041	0.704907	up	8.54938	8.40651	638510000	695330000	200240000	200760000	58237000	717870000	8.70143	8.75091	8.19581	8.39552	7.88725	8.93676
616	A0A0P0VUC6;Q8H7W7;A2XDI0;A0A0E0GHY6;B9F5P1	A0A0P0VUC6;Q8H7W7;A2XDI0;A0A0E0GHY6;B9F5P1	Os03g0194900 protein;Cytochrome b561 and DOMON domain-containing protein;Cytochrome b561 and DOMON domain-containing protein;Cytochrome b561 and DOMON domain-containing protein;Cytochrome b561 and DOMON domain-containing protein	LOC_Os03g09900 Os03g0194900 OSJNBa0064E16.10 OSNPB_030194900;Os03g0194900 OSNPB_030194900;OsI_10369;OsJ_09760	2.05203	0.373901	up	2.03705	1	0	16951000	0	0	0	0	1	4.11116	1	1	1	1
618	Q0DU92;A0A0E0GI31;A0A0E0GI30;B8AQ42	Q0DU92;A0A0E0GI31;A0A0E0GI30;B8AQ42	Os03g0199000 protein (Fragment);Uncharacterized protein;Uncharacterized protein;Uncharacterized protein	Os03g0199000;OsI_10400	8.63439	1.64189e-08	up	4.11009	1	13496000	20173000	17348000	0	0	0	4.068	4.1449	4.11739	1	1	1
619	A0A0P0VUA6;P49397;A2XDL4;A0A0E0GI38;Q0INR5;B9GCT2;B8BP92;A0A0E0J9J1;A6N1F4	A0A0P0VUA6;P49397;A2XDL4;A0A0E0GI38;Q0INR5;B9GCT2;B8BP92;A0A0E0J9J1	Os03g0200500 protein (Fragment);40S ribosomal protein S3a;40S ribosomal protein S3a;40S ribosomal protein S3a;40S ribosomal protein S3a;40S ribosomal protein S3a;40S ribosomal protein S3a;40S ribosomal protein S3a	Os03g0200500 OSNPB_030200500;Os12g0406200 LOC_Os12g21798 Os12g0406200 OSNPB_120406200;OsI_10409;OsI_38068;OsJ_35850;RPS3A CYC07 T151 Os03g0200500 LOC_Os03g10340 OsJ_09804	119.994	2.82206e-07	up	7.90682	1	140660000	129210000	73671000	0	0	0	8.04332	7.96927	7.70786	1	1	1
622	B9FYW0;Q6K5H9;A0A0E0GIK6;Q8W425;Q01IF7;A2XUT7;A0A0E0H2B2;A6N103;A2X6U4	B9FYW0;Q6K5H9;A0A0E0GIK6;Q8W425;Q01IF7;A2XUT7;A0A0E0H2B2;A6N103;A2X6U4	Uncharacterized protein;Os02g0600100 protein;Uncharacterized protein;26S proteasome non-ATPase regulatory subunit 6;H0805A05.13 protein;Uncharacterized protein;Uncharacterized protein;Proteasome non-atpase regulatory subunit 6 (Fragment);Uncharacterized pr	H0805A05.13 H0811E11.2;Os02g0600100 Os02g0600100 OJ1791_B03.16 OSNPB_020600100;OsI_07934;OsI_16374;OsJ_25897;RPN7 Os04g0485000 LOC_Os04g40850 OJ000223_09.5 OsJ_15241 OSJNBa0081L15.15	8.58739	2.86998e-08	up	4.10222	1	14158000	14453000	20647000	0	0	0	4.08018	4.07283	4.15365	1	1	1
623	Q8H065;A2XDR4;A0A0E0GIR1	Q8H065;A2XDR4;A0A0E0GIR1	Mitochondrial ribosomal protein L51/S25/CI-B8 family protein, putative, expressed;Uncharacterized protein;Uncharacterized protein	OsI_10460;OSJNBa0014O06.7 LOC_Os03g10930 Os03g0207250 OsJ_09851 OSNPB_030207250	8.21282	1.67587e-07	up	4.03788	1	7870200	13440000	15149000	0	0	0	3.96165	4.05951	4.09247	1	1	1
624	Q10Q59;B8AQH0;Q10Q60;Q8H057;A0A0E0GIS3;Q10Q61;J3SMR9	Q10Q59;B8AQH0;Q10Q60;Q8H057;A0A0E0GIS3;Q10Q61;J3SMR9	ADP-glucose pyrophosphorylase family protein, putative, expressed;Uncharacterized protein;ADP-glucose pyrophosphorylase family protein, putative, expressed;Putative GDP-mannose pyrophosphorylase;Uncharacterized protein;ADP-glucose pyrophosphorylase;Mannose	LOC_Os03g11050;LOC_Os03g11050 Os03g0208900 OsJ_09861 OSNPB_030208900;OsI_10470;OSJNBa0014O06.15	2.01327	0.373901	up	2.00954	1	11465000	0	0	0	0	0	4.02863	1	1	1	1	1
627	A0A0E0GIW1;Q10Q29;B8AQV8	A0A0E0GIW1;Q10Q29;B8AQV8	Uncharacterized protein;Leucine-rich repeat resistance protein, putative, expressed;Uncharacterized protein	Os03g0211900 LOC_Os03g11340 Os03g0211900 OsJ_09888 OSNPB_030211900;OsI_10498	1.94176	0.373901	up	1.95736	1	0	0	5553400	0	0	0	1	1	3.87209	1	1	1
629	A0A0P0VUM8;B8BEP9;Q6ES11;Q10Q18;B8BEQ0;A2XDW4;A0A0E0GIX5;B9F660;A0A0E0II20;A0A0E0II19;A0A0E0II21;A3BXT8;Q6ES90;Q0J2F7;A0A0E0II22	A0A0P0VUM8;B8BEP9;Q6ES11;Q10Q18;B8BEQ0;A2XDW4;A0A0E0GIX5;B9F660;A0A0E0II20;A0A0E0II19;A0A0E0II21;A3BXT8;Q6ES90;Q0J2F7;A0A0E0II22	Os03g0213100 protein (Fragment);Uncharacterized protein;Os09g0347700 protein;Os03g0213100 protein;Uncharacterized protein;Uncharacterized protein;Uncharacterized protein;Uncharacterized protein;Uncharacterized protein;Uncharacterized protein;Uncharacterize	LOC_Os03g11440 Os03g0213100 OSNPB_030213100;Os03g0213100 OSNPB_030213100;Os09g0347500 OSNPB_090347500;Os09g0347700 OsJ_29000 OSNPB_090347700 P0512H04.21 P0698G06.1;OsI_10508;OsI_30995;OsI_30997;OsJ_09896;OsJ_29002;P0512H04.19	1.13074	0.740246	up	8.63851	8.46124	563750000	552600000	504380000	19386000	715250000	719350000	8.62542	8.66469	8.62542	7.46419	8.97756	8.94198
630	Q10Q05;B8AQT0;A0A0E0GIZ6;A0A0E0GIZ5;Q8W3N0;A0A0P0VUN4	Q10Q05;B8AQT0;A0A0E0GIZ6;A0A0E0GIZ5;Q8W3N0;A0A0P0VUN4	Os03g0214600 protein;Uncharacterized protein;Uncharacterized protein;Uncharacterized protein;26S proteasome regulatory particle non-ATPase subunit9b (Fragment);Os03g0214600 protein (Fragment)	Os03g0214600 LOC_Os03g11570 Os03g0214600 OsJ_09909 OSNPB_030214600;Os03g0214600 OSNPB_030214600;OsI_10521;OsRPN9b	4.39737	0.512797	up	5.23238	3.09574	0	39879000	35623000	0	0	10162000	1	7.37405	7.3231	1	1	7.28722
631	A0A0P0VUP9;B9F676;A0A0E0GJ14;A0A0P0VUP1;B8AQU2;A0A0P0VUR3	A0A0P0VUP9;B9F676;A0A0E0GJ14;A0A0P0VUP1;B8AQU2;A0A0P0VUR3	Os03g0216600 protein (Fragment);Probable glucan 1,3-alpha-glucosidase;Uncharacterized protein;Os03g0216600 protein (Fragment);Uncharacterized protein;Os03g0216600 protein (Fragment)	Os03g0216600 LOC_Os03g11720 OsJ_09923;Os03g0216600 OSNPB_030216600;OsI_10536	8.55234	1.46728e-07	up	4.09632	1	14494000	11883000	21724000	0	0	0	4.08654	4.03467	4.16776	1	1	1
632	Q10PV6;A2XE09;A0A0E0GJ41;A0A0E0GJ38	Q10PV6;A2XE09;A0A0E0GJ41;A0A0E0GJ38	50S ribosomal protein L15, chloroplast, putative, expressed;Uncharacterized protein;Uncharacterized protein;Uncharacterized protein	LOC_Os03g12020 Os03g0219900 OsJ_09949 OSNPB_030219900;OsI_10555	164.384	3.44319e-09	up	8.36093	1	286530000	330130000	251620000	0	0	0	8.34202	8.4306	8.31016	1	1	1
634	B9F6K7;Q7XYS3;A2XE43;A0A0E0GJ59	B9F6K7;Q7XYS3;A2XE43;A0A0E0GJ59	Uncharacterized protein;Allene oxide synthase 2;Uncharacterized protein;Uncharacterized protein	CYP74A2 AOS2 Os03g0225900 LOC_Os03g12500 OSJNBa0081P02.18;OsI_10591;OsJ_09990	7.1298	5.95779e-08	up	3.83386	1	4442000	5868300	4365400	0	0	0	3.78226	3.87978	3.83954	1	1	1
635	B7EAG8;Q0JMH0;B8A8N0;A0A0E0GJ87;B9EX46	B7EAG8;Q0JMH0;B8A8N0;A0A0E0GJ87;B9EX46	Os01g0505400 protein;2-hydroxyacyl-CoA lyase;Uncharacterized protein;Uncharacterized protein;Uncharacterized protein	Os01g0505400 LOC_Os01g32080;Os01g0505400 OSNPB_010505400;OsI_02106;OsJ_01941	37.8018	0.00867718	up	6.24038	1	33168000	40218000	12706000	0	0	0	7.28349	7.38212	4.05554	1	1	1
637	Q10P99;A2XEE9;A0A0E0GJK2;Q10P98	Q10P99;A2XEE9;A0A0E0GJK2;Q10P98	Os03g0241900 protein;Uncharacterized protein;Uncharacterized protein;Senescence-associated protein, expressed	LOC_Os03g13840;Os03g0241900 LOC_Os03g13840 Os03g0241900 OsJ_10096 OSNPB_030241900;OsI_10705	15.0471	0.121755	up	4.91142	1	54309000	0	29470000	0	0	0	7.56758	1	6.16667	1	1	1
639	A0A0P0VVF6;A0A0N7KGX7;A0A0P0VVE7;Q8S565;Q10P53;B9F6R9;B8AK12;A0A0E0GJP3	A0A0P0VVF6;A0A0N7KGX7;A0A0P0VVE7;Q8S565;Q10P53;B9F6R9;B8AK12;A0A0E0GJP3	Os03g0246800 protein (Fragment);Os03g0246800 protein;Os03g0246800 protein (Fragment);Guanine nucleotide-exchange protein GEP2;Os03g0246800 protein;Uncharacterized protein;Uncharacterized protein;Uncharacterized protein	GEP2;LOC_Os03g14260 Os03g0246800;Os03g0246800 OSNPB_030246800;OsI_10738;OsJ_10127	88.4284	6.13699e-10	up	7.46644	1	41756000	48994000	47579000	0	0	0	7.42639	7.49457	7.47836	1	1	1
640	Q10P12;A2XEL6;A0A0E0GJS4	Q10P12;A2XEL6;A0A0E0GJS4	V-type proton ATPase subunit a;V-type proton ATPase subunit a;V-type proton ATPase subunit a	LOC_Os03g14690 Os03g0251500 OsJ_10160 OSNPB_030251500;OsI_10776	3.95006	0.116123	up	2.98187	1	7773100	0	9433800	0	0	0	3.96044	1	3.98518	1	1	1
641	Q10NZ1;A0A0E0GJU6;Q10NZ2;A0A0E0GJU7;B9GDX7;A2XEN1	Q10NZ1;A0A0E0GJU6;Q10NZ2;A0A0E0GJU7;B9GDX7;A2XEN1	Expressed protein;Uncharacterized protein;Expressed protein;Uncharacterized protein;Uncharacterized protein;Uncharacterized protein	LOC_Os03g14890 Os03g0253800 OSNPB_030253800;Os03g0253800 LOC_Os03g14890 OSNPB_030253800;OsI_10791;OsJ_36633	9.1365	3.45453e-09	up	4.19164	1	27412000	23412000	22543000	0	0	0	4.22276	4.17341	4.17876	1	1	1
643	A0A0E0GJW2;B9F6U3;Q0DTD2;B8AKA7	A0A0E0GJW2;B9F6U3;Q0DTD2;B8AKA7	Uncharacterized protein;Uncharacterized protein;Os03g0255200 protein;Uncharacterized protein	Os03g0255200 Os03g0255200 OSNPB_030255200;OsI_10801;OsJ_10173	63.4493	0.000128748	up	6.98753	1	38387000	30893000	42706000	0	0	0	7.37241	6.16667	7.42352	1	1	1
644	Q6ZDY8;B8B729;A0A0E0GJZ6;B9FVD6;A0A0P0X2D8	Q6ZDY8;B8B729;A0A0E0GJZ6;B9FVD6;A0A0P0X2D8	Succinate dehydrogenase [ubiquinone] flavoprotein subunit, mitochondrial;Succinate dehydrogenase [ubiquinone] flavoprotein subunit, mitochondrial;Succinate dehydrogenase [ubiquinone] flavoprotein subunit, mitochondrial;Uncharacterized protein;Os07g0134800	Os07g0134800 OSNPB_070134800;OsI_24801;OsJ_23002;SDH1 Os07g0134800 LOC_Os07g04240 P0507H12.27	1.40359	0.176923	up	8.35962	7.8705	115760000	403200000	522670000	146530000	30951000	30911000	7.92003	8.50733	8.65149	8.26528	7.64607	7.70014
645	Q0DN56;B9F5Y1;Q6ZLK5;A2YHX1;A0A0E0GK03;Q7XZW7;A2XME8;A0A0E0GUE7	Q0DN56;B9F5Y1;Q6ZLK5;A2YHX1;A0A0E0GK03;Q7XZW7;A2XME8;A0A0E0GUE7	Os03g0773700 protein (Fragment);Uncharacterized protein;Os07g0134200 protein;Uncharacterized protein;Uncharacterized protein;Putative receptor-like protein kinase 1;Uncharacterized protein;Uncharacterized protein	LOC_Os03g56270 OSJNBb0094O03.15;Os03g0773700 OSNPB_030773700;Os07g0134200 OJ1118_D07.29 OsJ_22997 OSNPB_070134200 P0507H12.14;OsI_13698;OsI_24796;OsJ_12761	7.3972	2.61226e-09	up	3.88698	1	5510200	5656600	6741100	0	0	0	3.87488	3.87273	3.91333	1	1	1
646	Q6ZLK7;B9FVD3;B8B726;Q6ZLK8;A0A0E0GK04;A0A0P0X298;Q84PB6	Q6ZLK7;B9FVD3;B8B726;Q6ZLK8;A0A0E0GK04;A0A0P0X298;Q84PB6	Os07g0134000 protein;Uncharacterized protein;Uncharacterized protein;Os07g0134000 protein;Uncharacterized protein;Os07g0134000 protein (Fragment);Amino acid permease-like protein (Fragment)	OJ1118_D07.26-1 P0507H12.11-1 Os07g0134000 OSNPB_070134000;OJ1118_D07.26-2 Os07g0134000 P0507H12.11-2 OSNPB_070134000;Os07g0134000 OSNPB_070134000;OsI_24794;OsJ_22995	94.6246	1.21729e-08	up	7.56414	1	45817000	56965000	65184000	0	0	0	7.48452	7.57127	7.63664	1	1	1
648	Q84QA9;A2XEU9;A0A0E0GKB0;B8BDC3;B7EBN1;A0A0E0IM65;B9G4H4;A0A0E0IM63;Q0J0H7;A0A0E0IM64;B8AEI4;B9EYS9;A0A0E0G3Q1	Q84QA9;A2XEU9;A0A0E0GKB0;B8BDC3;B7EBN1;A0A0E0IM65;B9G4H4;A0A0E0IM63;Q0J0H7;A0A0E0IM64;B8AEI4;B9EYS9;A0A0E0G3Q1	Os03g0265300 protein;Uncharacterized protein;Uncharacterized protein;Uncharacterized protein;Os02g0225000 protein;Uncharacterized protein;Uncharacterized protein;Uncharacterized protein;Os09g0508900 protein (Fragment);Uncharacterized protein;Uncharacterize	OJ1012B02.12 LOC_Os03g15860 Os03g0265300 OsJ_10245 OSNPB_030265300;Os02g0225000 Os09g0508900 OSNPB_020225000 OSNPB_090508900;Os09g0508900;OsI_06425;OsI_10863;OsI_31982;OsJ_00049;OsJ_29959	22.4316	0.00817893	up	5.48746	1	17462000	29725000	31937000	0	0	0	4.12518	5.09708	7.24013	1	1	1
651	A0A0E0GKM0;Q7XND3;A3AXT8;A2XY09;A0A0E0GKL9;A0A0P0WFK3	A0A0E0GKM0;Q7XND3;A3AXT8;A2XY09;A0A0E0GKL9	Uncharacterized protein;OSJNBb0034I13.6 protein;Uncharacterized protein;Uncharacterized protein;Uncharacterized protein	Os04g0636600 OSJNBb0034I13.6;Os04g0636600 OSNPB_040636600;OsI_17588;OsJ_16326	8.88249	2.99302e-08	up	4.15096	1	19996000	16349000	24028000	0	0	0	4.15957	4.1014	4.19193	1	1	1
652	A0A0E0GKP7;Q7XPH4;Q01HX3;A2XY28;A0A0E0GKP6;A3AXV7;Q0J9P0	A0A0E0GKP7;Q7XPH4;Q01HX3;A2XY28;A0A0E0GKP6;A3AXV7	Uncharacterized protein;OSJNBb0003B01.9 protein;OSIGBa0138H21-OSIGBa0138E01.2 protein;Uncharacterized protein;Uncharacterized protein;Uncharacterized protein	Os04g0639300 Os04g0639300 OSNPB_040639300;OsI_17606;OSIGBa0138H21-OSIGBa0138E01.2;OsJ_16343;OSJNBb0003B01.9	22.4841	0.112151	up	7.70216	3.21133	62984000	87696000	73127000	29688000	0	0	7.63291	7.77472	7.69885	7.63398	1	1
653	A3AGN3;A0A0E0GKS3;Q10N72;B8ALH4;Q0DSY8	A3AGN3;A0A0E0GKS3;Q10N72;B8ALH4;Q0DSY8	Uncharacterized protein;Uncharacterized protein;ABC transporter family protein, putative, expressed;Uncharacterized protein;Os03g0280000 protein (Fragment)	Os03g0280000;Os03g0280000 LOC_Os03g17180 OSNPB_030280000;OsI_11025;OsJ_10362	4.12276	0.116128	up	3.04361	1	12519000	15069000	0	0	0	0	4.04888	4.08196	1	1	1	1
655	Q8H8U7;A0A0E0GKV2;B8ALI4	Q8H8U7;A0A0E0GKV2;B8ALI4	Expressed protein;Uncharacterized protein;Uncharacterized protein	Os03g0282900 LOC_Os03g17450 Os03g0282900 OsJ_10385 OSNPB_030282900;OsI_11050	106.565	1.19104e-08	up	7.73559	1	88023000	89541000	65930000	0	0	0	7.77302	7.7877	7.64607	1	1	1
657	Q10MZ3;A2XFF1;A0A0E0GL13	Q10MZ3;A2XFF1;A0A0E0GL13	Os03g0288700 protein;Uncharacterized protein;Uncharacterized protein	LOC_Os03g17940 Os03g0288700 OsJ_10434 OSNPB_030288700;OsI_11094	1.35293	0.844866	up	3.49646	3.06037	3193100	4836200	4751600	0	8787800	0	2.80273	3.83724	3.84943	1	7.18112	1
658	Q0DSS9;B8ALL1;Q10MX9;A0A0E0GL23;Q2HWS9	Q0DSS9;B8ALL1;Q10MX9;A0A0E0GL23;Q2HWS9	Os03g0290300 protein (Fragment);Uncharacterized protein;Omega-3 fatty acid desaturase, chloroplast, putative, expressed;Uncharacterized protein;Plastid omega-3 fatty acid desaturase	LOC_Os03g18070 OsJ_10445;Os03g0290300 OSNPB_030290300;OsFAD7;OsI_11106	81.9084	1.766e-08	up	7.35594	1	43244000	37890000	33633000	0	0	0	7.44496	7.33659	7.28627	1	1	1
659	A0A0E0GL33;B8ALL8;A0A0E0GL32;B9F7S2;Q10MX3	A0A0E0GL33;B8ALL8;A0A0E0GL32;B9F7S2;Q10MX3	Uncharacterized protein;Uncharacterized protein;Uncharacterized protein;Uncharacterized protein;Asparagine synthetase [glutamine-hydrolyzing] 1	Os03g0291500 LOC_Os03g18130;OsI_11112;OsJ_10452	19.6657	0.116135	up	5.29761	1	0	41297000	49400000	0	0	0	1	7.40217	7.49065	1	1	1
663	Q2WEA7;Q10MT2;A2XFL2;A0A0E0GL74	Q2WEA7;Q10MT2;A2XFL2;A0A0E0GL74	Eukaryotic translation initiation factor 2 alpha;Eukaryotic translation initiation factor 2 alpha subunit family protein, expressed;Uncharacterized protein;Uncharacterized protein	eIF2 alpha;Os03g0296400 LOC_Os03g18510 Os03g0296400 OsJ_10487 OSNPB_030296400;OsI_11150	24.2281	0.00788325	up	5.59861	1	26709000	30289000	39140000	0	0	0	4.21651	5.20359	7.37573	1	1	1
664	Q10MS5;A2XFL8;A0A0E0GL84;A0A0E0GL83;Q10MS4;A2XFL9;A0A0E0GL87;A6N0X9	Q10MS5;A2XFL8;A0A0E0GL84;A0A0E0GL83;Q10MS4;A2XFL9;A0A0E0GL87	40S ribosomal protein S7;40S ribosomal protein S7;40S ribosomal protein S7;Uncharacterized protein;40S ribosomal protein S7;40S ribosomal protein S7;40S ribosomal protein S7	LOC_Os03g18570 Os03g0297100 OsJ_10495 OSNPB_030297100;LOC_Os03g18580 OsJ_10496;OsI_11157;OsI_11158	162.688	1.5035e-08	up	8.34596	1	370880000	260130000	239530000	0	0	0	8.44883	8.30752	8.28154	1	1	1
665	B8AM13;Q10MS3;B9F7U9;B8AM10;A0A0E0GL88	B8AM13;Q10MS3;B9F7U9;B8AM10;A0A0E0GL88	Uncharacterized protein;Malonyl CoA-acyl carrier protein transacylase containing protein, expressed;Uncharacterized protein;Uncharacterized protein;Uncharacterized protein	LOC_Os03g18590 Os03g0297400 OSNPB_030297400;OsI_11159;OsI_11164;OsJ_10497	18.9245	0.11624	up	5.24219	1	45294000	34318000	0	0	0	0	7.4754	7.25116	1	1	1	1
666	B8AMG1;A0A0E0GLA8;B7FA23;Q10ML0;Q0DSJ5	B8AMG1;A0A0E0GLA8;B7FA23;Q10ML0	Uncharacterized protein;Uncharacterized protein;Os03g0305000 protein;AMP-binding enzyme family protein, expressed	LOC_Os03g19240;Os03g0305000;Os03g0305000 OsJ_10547 OSNPB_030305000;OsI_11221	124.546	1.34756e-08	up	7.96054	1	137050000	134770000	101580000	0	0	0	8.01841	7.99776	7.86544	1	1	1
667	Q10MK9;A0A0E0GLA9;B8AMG2;B9F7X4;A2XFS8	Q10MK9;A0A0E0GLA9;B8AMG2;B9F7X4;A2XFS8	AMP-binding enzyme family protein, expressed;Uncharacterized protein;Uncharacterized protein;Uncharacterized protein;Uncharacterized protein	LOC_Os03g19250 Os03g0305100 OSNPB_030305100;OsI_11223;OsI_11224;OsJ_10548	18.7487	0.116129	up	5.22872	1	0	36429000	39226000	0	0	0	1	7.30784	7.37832	1	1	1
668	Q10MJ2;B8AMG8;A0A0E0GLC5	Q10MJ2;B8AMG8;A0A0E0GLC5	Expressed protein;Uncharacterized protein;Uncharacterized protein	Os03g0307000 LOC_Os03g19400 Os03g0307000 OsJ_10562 OSNPB_030307000;OsI_11239	17.9496	0.0141039	up	5.16588	1	20366000	22560000	30363000	0	0	0	4.16291	4.16776	7.16697	1	1	1
670	A0A0P0VXD9;Q10MH5;A2XFV9;A0A0E0GLE9;Q10MH4	A0A0P0VXD9;Q10MH5;A2XFV9;A0A0E0GLE9;Q10MH4	Os03g0308800 protein (Fragment);TPR Domain containing protein, expressed;Uncharacterized protein;Uncharacterized protein;Os03g0308800 protein	LOC_Os03g19560;Os03g0308800 LOC_Os03g19560 Os03g0308800 OsJ_10578 OSNPB_030308800;Os03g0308800 OSNPB_030308800;OsI_11257	2.07518	0.373901	up	2.05324	1	0	21589000	0	0	0	0	1	4.15971	1	1	1	1
671	Q10MF6;A0A0E0GLG9;A0A0E0GLG8;A0A0E0GLG7;Q10MF7;B9F831;B8AMI8;Q0DSF8	Q10MF6;A0A0E0GLG9;A0A0E0GLG8;A0A0E0GLG7;Q10MF7;B9F831;B8AMI8;Q0DSF8	Expressed protein;Uncharacterized protein;Uncharacterized protein;Uncharacterized protein;Expressed protein;Uncharacterized protein;Uncharacterized protein;Os03g0310500 protein (Fragment)	LOC_Os03g19690;Os03g0310500 OSNPB_030310500;OsI_11272;OsJ_10590	82.0857	1.38746e-07	up	7.35906	1	33489000	35092000	51489000	0	0	0	7.2892	7.27234	7.51563	1	1	1
672	A0A0E0GLH7;A0A0E0GLH6;A0A0E0GLH5;B9F834;A0A0E0GLH4;Q10ME8;B8AI99;C7IZT3;A0A0P0VWM6;Q10ME7	A0A0E0GLH7;A0A0E0GLH6;A0A0E0GLH5;B9F834;A0A0E0GLH4;Q10ME8;B8AI99	Uncharacterized protein;Uncharacterized protein;Uncharacterized protein;Uncharacterized protein;Uncharacterized protein;HAD-superfamily hydrolase, subfamily IA, variant 3 containing protein, expressed;Uncharacterized protein	LOC_Os03g19760;Os03g0311300;Os03g0311300 OSNPB_030311300;OsI_07299;OsJ_10596	120.452	4.28177e-08	up	7.91231	1	100230000	143570000	97149000	0	0	0	7.85539	8.03917	7.84237	1	1	1
674	A3AHB5;Q10MD1;A2XFY9;A0A0E0GLJ2	A3AHB5;Q10MD1;A2XFY9;A0A0E0GLJ2	Adenylosuccinate lyase;Adenylosuccinate lyase;Adenylosuccinate lyase;Adenylosuccinate lyase	Os03g0313600 LOC_Os03g19930 Os03g0313600 OSNPB_030313600;OsI_11289;OsJ_10609	2.93172	0.134511	up	2.55175	1	3288900	0	4254500	0	0	0	2.82236	1	3.83288	1	1	1
675	A0A0P0VWS3;A6N017;A0A0E0GLK8;B9F848;Q0DSD6;Q10MB2;A2XG06;A0A0E0GLK9	A0A0P0VWS3;A6N017;A0A0E0GLK8;B9F848;Q0DSD6;Q10MB2;A2XG06;A0A0E0GLK9	Os03g0315800 protein (Fragment);30S ribosomal protein S1 (Fragment);Uncharacterized protein;Uncharacterized protein;Os03g0315800 protein (Fragment);30S ribosomal protein S1, chloroplast, putative, expressed;Uncharacterized protein;Uncharacterized protein	LOC_Os03g20100;Os03g0315800 OSNPB_030315800;OsI_11307;OsJ_10622	4.36538	0.373901	up	3.12611	1	0	40126000	0	0	0	0	1	7.37832	1	1	1	1
676	Q10M78;Q10M79;B9F863;B8ANG7;A0A0E0GLN5;A0A0E0GLN6	Q10M78;Q10M79;B9F863;B8ANG7;A0A0E0GLN5;A0A0E0GLN6	Alpha-L-arabinofuranosidase C-terminus family protein, expressed;Alpha-L-arabinofuranosidase C-terminus family protein, expressed;Uncharacterized protein;Uncharacterized protein;Uncharacterized protein;Uncharacterized protein	LOC_Os03g20420;OsI_11337;OsJ_10647	4.16997	0.116244	up	3.06004	1	18656000	0	11515000	0	0	0	4.14545	1	4.03467	1	1	1
678	Q10M45;A2XG58;A0A0E0GLR7	Q10M45;A2XG58;A0A0E0GLR7	Mitochondrial import receptor subunit TOM40, putative, expressed;Uncharacterized protein;Uncharacterized protein	Os03g0323800 LOC_Os03g20750 Os03g0323800 OsJ_10671 OSNPB_030323800;OsI_11365	8.31413	3.31504e-07	up	4.05557	1	16148000	8634000	15544000	0	0	0	4.10738	3.96202	4.0973	1	1	1
679	Q10M36;A2XG65;A0A0U2RG57;A0A0U2JFM1;A0A0E0GLS3	Q10M36;A2XG65;A0A0U2RG57;A0A0U2JFM1;A0A0E0GLS3	NB-ARC domain containing protein, expressed;Uncharacterized protein;NBS-LRR-like resistance protein;NBS-LRR-like resistance protein;Uncharacterized protein	Os03g0324600 LOC_Os03g20840 Os03g0324600 OsJ_10673 OSNPB_030324600;Os03g20840;OsI_11371	21.9606	0.116138	up	5.45684	1	0	65959000	77928000	0	0	0	1	7.63664	7.73389	1	1	1
680	Q10M34;A0A0E0GLS5;B8ANF7;B8ANF5	Q10M34;A0A0E0GLS5;B8ANF7;B8ANF5	Expressed protein;Uncharacterized protein;Uncharacterized protein;Uncharacterized protein	Os03g0324800 LOC_Os03g20860 Os03g0324800 OsJ_10675 OSNPB_030324800;OsI_11373;OsI_11375	102.525	8.07099e-09	up	7.67984	1	67317000	63986000	81711000	0	0	0	7.65632	7.62455	7.75864	1	1	1
682	Q0DS76;Q10M07;A0A0E0GLU5;B9F8Y9;Q8H7M0	Q0DS76;Q10M07;A0A0E0GLU5;B9F8Y9;Q8H7M0	Os03g0328000 protein (Fragment);Guanine nucleotide exchange factor, putative, expressed;Uncharacterized protein;Uncharacterized protein;Putative adapter protein SPIKE1	LOC_Os03g21080;Os03g0328000 OSNPB_030328000;OsJ_11229;OSJNBb0014I10.6	2.05767	0.373901	up	2.04101	1	0	18115000	0	0	0	0	1	4.12304	1	1	1	1
683	Q10LV8;B9FUX1;B8B633;A0A0E0I5R6;Q7XHW8;Q10LV9;B8ANY9;A0A0E0GLZ2;A0A0E0GLZ1;B8ANZ2	Q10LV8;B9FUX1;B8B633;A0A0E0I5R6;Q7XHW8;Q10LV9;B8ANY9;A0A0E0GLZ2;A0A0E0GLZ1;B8ANZ2	Eukaryotic translation initiation factor 2 beta subunit, putative, expressed;Uncharacterized protein;Uncharacterized protein;Uncharacterized protein;Os07g0681000 protein;Eukaryotic translation initiation factor 2 beta subunit, putative, expressed;Uncharact	LOC_Os03g21550;LOC_Os03g21550 Os03g0333300 OsJ_10726 OSNPB_030333300;Os07g0681000 OSJNBa0008J01.17 OSNPB_070681000;OsI_11432;OsI_11441;OsI_27355;OsJ_25601	14.3249	0.00450971	up	4.84046	1	18831000	30998000	24828000	0	0	0	4.14822	6.17386	4.19929	1	1	1
684	Q84NX8;A2XIU7;A0A0E0H2J2;Q10LR6;A2XGG9;A0A0E0GM45	Q84NX8;A2XIU7;A0A0E0H2J2;Q10LR6;A2XGG9;A0A0E0GM45	Ribosomal protein L19;Ribosomal protein L19;Ribosomal protein L19;Ribosomal protein L19;Ribosomal protein L19;Ribosomal protein L19	LOC_Os03g21940 Os03g0337800 OsJ_10765 OSNPB_030337800;Os03g0579300 LOC_Os03g38260 OsJ_11537 OSJNBa0083K01.10 OSJNBb0016P23.5 OSNPB_030579300;OsI_11477;OsI_12360	8.41558	0.172113	up	4.07306	1	4793200	0	40573000	0	0	0	3.82354	1	7.39565	1	1	1
687	Q10LL4;B7EZ20;A0A0P0XA87;Q0DRZ2;Q10LL5;B8APE3;Q0D3Q1;B8B5U9;A0A0E0GM89;A0A0E0I5J9;B9FUU5;Q7XI72	Q10LL4;B7EZ20;A0A0P0XA87;Q0DRZ2;Q10LL5;B8APE3;Q0D3Q1;B8B5U9;A0A0E0GM89;A0A0E0I5J9;B9FUU5;Q7XI72	Pre-mRNA splicing factor SF2, putative, expressed;cDNA clone:001-208-C08, full insert sequence (Fragment);Os07g0673500 protein;Os03g0344100 protein;Os03g0344100 protein;Uncharacterized protein;Os07g0673500 protein;Uncharacterized protein;Uncharacterized pr	LOC_Os03g22380;Os03g0344100 LOC_Os03g22380 OsJ_10806 OSNPB_030344100;Os03g0344100 OSNPB_030344100;Os07g0673500 Os07g0673500 OSNPB_070673500;Os07g0673500 OSNPB_070673500;OsI_11526;OsI_27298;OsJ_25544;P0470D12.143-1	1.91345	0.373901	up	1.93617	1	4677100	0	0	0	0	0	3.80852	1	1	1	1	1
690	Q10LH0;D5L1S4;A0A2Z4U076;A0A2Z4U042;A0A0E0GME8	Q10LH0;D5L1S4;A0A2Z4U076;A0A2Z4U042;A0A0E0GME8	Divinyl chlorophyllide a 8-vinyl-reductase, chloroplastic;Divinyl chlorophyllide a 8-vinyl-reductase, chloroplastic;Divinyl reductase;Divinyl reductase;Uncharacterized protein	DVR;DVR Os03g0351200 LOC_Os03g22780 OsJ_10840;DVR OsI_11570	112.371	3.5181e-08	up	7.81213	1	76654000	95136000	108950000	0	0	0	7.70528	7.81973	7.91138	1	1	1
691	Q850L8;Q10L93;A3AI13;A2XM21;A2XGS7;A0A0E0GTU8;A0A0E0GMJ2;Q7Y029	Q850L8;Q10L93;A3AI13;A2XM21;A2XGS7;A0A0E0GTU8;A0A0E0GMJ2;Q7Y029	50S ribosomal protein L6, putative, expressed;50S ribosomal protein L6, putative, expressed;Uncharacterized protein;Uncharacterized protein;Uncharacterized protein;Uncharacterized protein;Uncharacterized protein;Putative ribosomal protein CtrL6e, 5-partia	OJ1112_G08.1;Os03g0356300 LOC_Os03g24020 Os03g0356300 OSNPB_030356300;OsI_11607;OsI_13529;OsJ_10878;OSJNBa0032E21.12 OSJNBa0047E24.13 LOC_Os03g54040 Os03g0751400 OsJ_12590 OSNPB_030751400	25.9143	0.118004	up	5.69568	1	52781000	413330000	0	0	0	0	7.55793	8.5291	1	1	1	1
693	Q10L35;B8APW1;A0A0E0GML8	Q10L35;B8APW1;A0A0E0GML8	Expressed protein;Uncharacterized protein;Uncharacterized protein	Os03g0360500 LOC_Os03g24580 Os03g0360500 OsJ_10921 OSNPB_030360500;OsI_11654	4.40122	0.373901	up	3.1379	1	0	0	42006000	0	0	0	1	1	7.41371	1	1	1
695	Q2QNJ0;A2ZLP6;A0A0E0GMP0;B9F7E7	Q2QNJ0;A2ZLP6;A0A0E0GMP0;B9F7E7	Expressed protein;Uncharacterized protein;Uncharacterized protein;Uncharacterized protein	Os12g0563600 LOC_Os12g37650 Os12g0563600 OSNPB_120563600;OsI_38742;OsJ_13233	1.48187	0.373901	up	1.56742	1	2677500	0	0	0	0	0	2.70225	1	1	1	1	1
696	A0A0P0VYL2;Q10KX5;A0A0E0GMS1;B8AQ72;A3AIA4	A0A0P0VYL2;Q10KX5;A0A0E0GMS1;B8AQ72;A3AIA4	Os03g0367101 protein (Fragment);Transposon protein, putative, unclassified, expressed;Uncharacterized protein;Uncharacterized protein;Uncharacterized protein	LOC_Os03g25150;Os03g0367101 OSNPB_030367101;OsI_11712;OsJ_10974	8.77829	2.1507e-08	up	4.13394	1	14422000	21164000	21083000	0	0	0	4.08557	4.15498	4.16127	1	1	1
697	Q7Y168;A2XHA1;A0A0E0GMV0	Q7Y168;A2XHA1;A0A0E0GMV0	Expressed protein;Uncharacterized protein;Uncharacterized protein	Os03g0375200 LOC_Os03g25850 OSJNBa0090L05.5 OSNPB_030375200;OsI_11778	2.01923	0.373901	up	2.0138	1	0	0	11806000	0	0	0	1	1	4.04141	1	1	1
699	Q67J16;B8BCL9;A0A0E0GN65;A0A0E0GN67;A0A0E0GN66;A0A0N7KQX9;A0A0P0XPE1	Q67J16;B8BCL9;A0A0E0GN65;A0A0E0GN67;A0A0E0GN66;A0A0N7KQX9	Os09g0459800 protein;Uncharacterized protein;Uncharacterized protein;Uncharacterized protein;Uncharacterized protein;Os09g0459800 protein	B1045B05.39-1 Os09g0459800 OsJ_29644 OSJNBa0054F02.17-1 OSNPB_090459800;Os09g0459800 OSNPB_090459800;OsI_31662	28.0065	0.0880114	up	7.94645	3.13876	140830000	89284000	135560000	0	16193000	0	8.04529	7.78364	8.01042	1	7.41628	1
700	A6N015;B7F4N5;B8BCK1;A0A0P0XMX9;Q67UZ0;B9G3Z1;A0A0E0GNB1	A6N015;B7F4N5;B8BCK1;A0A0P0XMX9;Q67UZ0;B9G3Z1;A0A0E0GNB1	Aspartate aminotransferase (Fragment);cDNA clone:001-041-E06, full insert sequence;Uncharacterized protein;Os09g0453800 protein;Aminotransferase;Uncharacterized protein;Uncharacterized protein	Os09g0453800 OSNPB_090453800;OsI_31623;OsIDI4 Os09g0453800 OSNPB_090453800 P0488D02.27;OsJ_29606	4.16474	0.116243	up	3.05822	1	18330000	0	11383000	0	0	0	4.1424	1	4.03227	1	1	1
701	A0A0P0XGY2;A0A0E0GND9;Q6YTT3;A2YWD9	A0A0P0XGY2;A0A0E0GND9;Q6YTT3;A2YWD9	Phospho-2-dehydro-3-deoxyheptonate aldolase (Fragment);Phospho-2-dehydro-3-deoxyheptonate aldolase;Phospho-2-dehydro-3-deoxyheptonate aldolase;Phospho-2-dehydro-3-deoxyheptonate aldolase	Os08g0484500 OsJ_27713 OSNPB_080484500 P0419H09.15;Os08g0484500 OSNPB_080484500;OsI_29650	2.08652	0.373901	up	2.0611	1	0	0	22980000	0	0	0	1	1	4.1833	1	1	1
702	Q75LR5;A2XHI9;A0A0E0GNK1	Q75LR5;A2XHI9;A0A0E0GNK1	40S ribosomal protein S6;40S ribosomal protein S6;40S ribosomal protein S6	LOC_Os03g27260 Os03g0390000 OsJ_11113 OSJNBa0017N12.10 OSNPB_030390000;OsI_11874	1.26607	0.0012014	up	8.77721	8.43686	638410000	787160000	890150000	211900000	236520000	211130000	8.70039	8.8008	8.83045	8.42377	8.46303	8.42377
704	B8AQM6;A0A0E0GNK5	B8AQM6;A0A0E0GNK5	Uncharacterized protein;Uncharacterized protein	OsI_11879	19.317	0.0173678	up	5.2718	1	43828000	29320000	18696000	0	0	0	7.45522	4.22625	4.13393	1	1	1
706	P31924;A2XHR1;A0A0E0GNW5;A0A0E0GNW4;A0A0E0GNW6;Q43009;A2YNQ2;A0A0E0I3N9;A0A0P0VYH2;A0A0P0VYG9;A6N185;A6MZV1;Q94JM7	P31924;A2XHR1;A0A0E0GNW5;A0A0E0GNW4;A0A0E0GNW6;Q43009;A2YNQ2;A0A0E0I3N9	Sucrose synthase 1;Sucrose synthase;Sucrose synthase;Sucrose synthase;Sucrose synthase;Sucrose synthase 3;Sucrose synthase;Sucrose synthase	Os03g0401300 OSNPB_030401300;OsI_11950;OsI_26874;SUS1 RSS2 RSUS1 Os03g0401300 LOC_Os03g28330 OsJ_11182;SUS3 RSS3 RSUS3 Os07g0616800 LOC_Os07g42490 B1056G08.118 OsJ_25133 P0552F09.101	1.35006	0.0330929	up	9.16198	8.72895	1967100000	1717200000	1753400000	350780000	300630000	827990000	9.21401	9.15446	9.11747	8.62919	8.56597	8.99169
709	Q7Y0E6;B9F8X9;B8AJS4;A0A0E0GNY9	Q7Y0E6;B9F8X9;B8AJS4;A0A0E0GNY9	LOC496049 protein, putative, expressed;Uncharacterized protein;Uncharacterized protein;Uncharacterized protein	Os03g0405100 LOC_Os03g29180 Os03g0405100 OSJNBb0074M06.9 OSNPB_030405100;OsI_11973;OsJ_11205	8.98883	7.58881e-10	up	4.16813	1	21799000	24049000	20037000	0	0	0	4.17876	4.17876	4.14688	1	1	1
710	A0A0E0GNZ1;Q7Y0F2;B8AJS5;A0A0E0GNZ2;B9FKB2;Q7Y0E8;A2XHT7;A0A0E0GNZ0	A0A0E0GNZ1;Q7Y0F2;B8AJS5;A0A0E0GNZ2	Uncharacterized protein;Probable nucleoredoxin 1-2;Uncharacterized protein;Uncharacterized protein	Os03g0405500 LOC_Os03g29190 OsJ_11206 OSJNBb0074M06.8;Os03g0405900 LOC_Os03g29240 OsJ_11208 OSJNBa0002D18.22 OSJNBb0074M06.3;OsI_11974;OsI_11975;OsJ_16868	83.431	5.16778e-08	up	7.38251	1	33655000	49373000	37731000	0	0	0	7.29036	7.49913	7.35804	1	1	1
711	Q0DR89;Q10JU8;B9F8Y4;Q10JU9;B8AJP7;A0A0E0GP04;Q60ED8;A6MZN3;Q10JU7	Q0DR89;Q10JU8;B9F8Y4;Q10JU9;B8AJP7;A0A0E0GP04;Q60ED8;A6MZN3;Q10JU7	Os03g0407000 protein (Fragment);von Willebrand factor type A domain containing protein, expressed;Uncharacterized protein;von Willebrand factor type A domain containing protein, expressed;Uncharacterized protein;Uncharacterized protein;von Willebrand facto	LOC_Os03g29350;Os03g0407000 OSNPB_030407000;OsI_11983;OsJ_11214;OSJNBa0002D18.11	1.04125	0.47174	up	7.53615	7.47784	56410000	55483000	47432000	19689000	13828000	24538000	7.5769	7.55407	7.47749	7.4754	7.36299	7.59513
712	Q84MQ4;A2XHV1;A0A0E0GP10	Q84MQ4;A2XHV1;A0A0E0GP10	60S ribosomal protein L27a-3, putative, expressed;Uncharacterized protein;Uncharacterized protein	OsI_11989;OSJNBa0030J19.9 LOC_Os03g29460 Os03g0408300 OsJ_11217 OSNPB_030408300	7.94928	0.247235	up	8.40906	5.41824	307210000	328640000	330470000	29126000	29539000	0	8.37418	8.42651	8.42651	7.62455	7.63017	1
713	Q5KQL5;Q5KQL4;P40978;A2XI59;A0A0E0GPB8;A0A0E0GPB9;Q10JD1;Q0DR25;A6MZL9;Q5KQL3;A0A0E0GPC0;B8AK61	Q5KQL5;Q5KQL4;P40978;A2XI59;A0A0E0GPB8;A0A0E0GPB9;Q10JD1;Q0DR25;A6MZL9;Q5KQL3;A0A0E0GPC0	Putative ribosomal protein S19;Putative ribosomal protein S19;40S ribosomal protein S19;Uncharacterized protein;Uncharacterized protein;Uncharacterized protein;Retrotransposon protein, putative, Ty1-copia subclass;Os03g0424800 protein (Fragment);40S riboso	RPS19B Os03g0424500 LOC_Os03g31090 OsJ_11332 OSJNBa0032H19.8;LOC_Os03g31134;Os03g0424800;Os03g31090;Os03g31130;OsI_12116;OsI_12120 OsI_12122;RPS19A Os03g0424800 LOC_Os03g31134 OsJ_11334 OSJNBa0032H19.4	1.36627	0.0538227	up	8.71027	8.26002	546470000	773490000	643880000	304710000	89290000	108590000	8.61463	8.78653	8.72964	8.57388	8.06339	8.1428
714	Q75KD7;A2XID3;A0A0E0GPG7	Q75KD7;A2XID3;A0A0E0GPG7	Allene oxide cyclase, chloroplastic;Allene oxide cyclase, chloroplastic;Uncharacterized protein	AOC AOC3 CPM2 HB LOC_Os03g32314 Os03g0438100 OsJ_11399 OSJNBa0054H04.12 OSNPB_030438100;AOC AOC4 OsI_12194	22.2635	0.116122	up	5.47661	1	83254000	0	72264000	0	0	0	7.73938	1	7.69043	1	1	1
715	A6MZR1;Q10I13;B8AKU3;A3AJN9;A0A0E0GPQ2	A6MZR1;Q10I13;B8AKU3;A3AJN9;A0A0E0GPQ2	Uncharacterized protein (Fragment);Os03g0568500 protein;Uncharacterized protein;Uncharacterized protein;Uncharacterized protein	Os03g0568500 LOC_Os03g37090 Os03g0568500 OSJNBa0004B24.3 OSNPB_030568500;OsI_12299;OsJ_11482	7.9741	6.73518e-09	up	3.99532	1	11574000	9340700	9141400	0	0	0	4.02986	3.9807	3.9754	1	1	1
717	Q10HN8;Q75ID5;B8AL63;A0A0E0GPZ3	Q10HN8;Q75ID5;B8AL63;A0A0E0GPZ3	Expressed protein;Expressed protein;Uncharacterized protein;Uncharacterized protein	LOC_Os03g38520;OJ1785_A05.8 Os03g0581800 OsJ_11546 OSNPB_030581800;OsI_12375	110.307	1.21075e-10	up	7.78538	1	87804000	94355000	83035000	0	0	0	7.771	7.81414	7.771	1	1	1
719	Q10HI6;Q10HI8;A0A0E0GQ60;Q6F2U9;A3AJZ6;A2XIZ4	Q10HI6;Q10HI8;A0A0E0GQ60;Q6F2U9;A3AJZ6;A2XIZ4	Lysine--tRNA ligase;Lysine--tRNA ligase;Lysine--tRNA ligase;Lysine--tRNA ligase;Lysine--tRNA ligase;Lysine--tRNA ligase	LOC_Os03g38980;Os03g0586800 LOC_Os03g38980 OSJNBa0010D22.26;OsI_12406;OsJ_11579	1.32842	0.0279075	up	7.82098	7.41127	117480000	82549000	85135000	26074000	17170000	7438400	7.93164	7.74767	7.78364	7.58161	7.43983	7.21237
721	D5MNY0;D2K756;Q0DQD8;D7RXX9;A2XJD1;A0A0E0GQF5;Q75I36	D5MNY0;D2K756;Q0DQD8;D7RXX9;A2XJD1;A0A0E0GQF5;Q75I36	Mitochondrial ATP synthase 6 kDa subunit (Fragment);Mitochondrial ATP synthase 6 kDa subunit (Fragment);Os03g0606200 protein;Mitochondrial ATP synthase 6 kDa subunit;Uncharacterized protein;Uncharacterized protein;Expressed protein	Os03g0606200 Os03g0606200 OsJ_11685 OSNPB_030606200;OsI_12555;OSJNBa0004G03.27 LOC_Os03g40920 Os03g40920	1.8461	0.710977	up	4.10693	3.22245	15859000	16125000	17518000	31866000	0	0	4.10325	4.0973	4.12025	7.66736	1	1
722	A2XJL6;Q6AV23;A0A0E0GQK0;Q10GP3;A0A0E0HHZ8;B9FLJ6;B8AWH0;A0A0E0HHZ9;A0A0E0HI00	A2XJL6;Q6AV23;A0A0E0GQK0;Q10GP3;A0A0E0HHZ8;B9FLJ6;B8AWH0;A0A0E0HHZ9;A0A0E0HI00	Uncharacterized protein;Os03g0619400 protein;Uncharacterized protein;T-complex protein 1, beta subunit, putative, expressed;Uncharacterized protein;Uncharacterized protein;Uncharacterized protein;Uncharacterized protein;Uncharacterized protein	LOC_Os03g42220;Os03g0619400 LOC_Os03g42220 OsJ_11750 OSJNBa0063J18.19 OSNPB_030619400;OsI_12631;OsI_20931;OsJ_19499	78.9638	3.65216e-08	up	7.30312	1	37151000	39314000	30839000	0	0	0	7.35648	7.36109	7.19179	1	1	1
726	A0A0E0GR02;Q8LIE0;Q6END8;Q69NK4;Q5N990;P0C494;P0C493;P0C492;J3RG82;E9KIR6;A0A1W5HUN7;A0A1W5HL81;A0A0N9E130;A0A0N9E0X5;A0A0K0LS00;A0A0K0LKH1;A0A0P0Y1A9	A0A0E0GR02	Uncharacterized protein	OJ1001_G09.24 P0441A12.3;OJ1343_D04.103 P0453E03.123;Os11g0269100 OSNPB_110269100;P0557A01.17;rps8;rps8 9311105;rps8 PA107	1.18606	0.000257377	up	8.39068	8.1445	292270000	312680000	328970000	108640000	108640000	108410000	8.35185	8.40131	8.41888	8.14721	8.14516	8.14113
727	A0A0E0GR05;B9FA12;Q10G20;A2XK42	A0A0E0GR05;B9FA12;Q10G20;A2XK42	DNA-directed RNA polymerase subunit beta;DNA-directed RNA polymerase subunit beta;DNA-directed RNA polymerase subunit beta;DNA-directed RNA polymerase subunit beta	LOC_Os03g44484;OsI_12811;OsJ_11898	4.32282	0.116123	up	3.11197	1	19452000	0	22698000	0	0	0	4.15498	1	4.18094	1	1	1
729	A0A0P0W0Q4;Q53KN6;Q84PD0;A2XV12;A0A0E0GR19;A0A0E0GR18;A0A0P0VMI3;Q6H6G8;Q949C1;Q0DYZ8;B8AG47;B9F1G7;A0A0E0GAM3	A0A0P0W0Q4;Q53KN6;Q84PD0;A2XV12;A0A0E0GR19;A0A0E0GR18;A0A0P0VMI3;Q6H6G8;Q949C1;Q0DYZ8;B8AG47;B9F1G7;A0A0E0GAM3	Os03g0648400 protein (Fragment);DnaJ protein, putative, expressed;DNAJ-like protein;Uncharacterized protein;Uncharacterized protein;Uncharacterized protein;Os02g0656500 protein (Fragment);Putative DnaJ-like protein MsJ1;DnaJ-like protein;Os02g0656500 prote	LOC_Os03g44620;LOC_Os03g44620 Os03g0648400 OsJ_11911 OSNPB_030648400;Os02g0656500 Os02g0656500 OSNPB_020656500;Os02g0656500 OSNPB_020656500;Os03g0648400 OSNPB_030648400;OsI_08334;OsI_16451;OsJ_07792;P0519E06.27;W930ERIPDK	8.99153	5.18302e-08	up	4.16857	1	26738000	17011000	22360000	0	0	0	4.21673	4.11192	4.17705	1	1	1
730	Q710P3;Q6ENA9;P0C453;A0A1W5HRR6;A0A173CU57;A0A0N9DZP6;A0A0K0LRS5;A0A0K0LKS1;P0C454;P0C452;E9KIS7;A0A1W5HLC2;A0A0N6WZV3;A0A0K0LPJ3;J3RQ64;A0A0E0GR37	Q710P3;Q6ENA9;P0C453;A0A1W5HRR6;A0A173CU57;A0A0N9DZP6;A0A0K0LRS5;A0A0K0LKS1;P0C454;P0C452;E9KIS7;A0A1W5HLC2;A0A0N6WZV3;A0A0K0LPJ3;J3RQ64;A0A0E0GR37	Putative ribosomal protein L32;50S ribosomal protein L32, chloroplastic;50S ribosomal protein L32, chloroplastic;50S ribosomal protein L32, chloroplastic;50S ribosomal protein L32, chloroplastic;50S ribosomal protein L32, chloroplastic;50S ribosomal protei	rpl32;rpl32 9311165;rpl32 LOC_Osp1g00890 Nip166;rpl32 PA166;xd23	82.247	7.99172e-08	up	7.36189	1	41040000	45144000	31533000	0	0	0	7.40998	7.44868	7.22701	1	1	1
732	Q0DPW6;Q10FT7;Q7Y0A2;A2XK84;A0A0E0GR81	Q0DPW6;Q10FT7;Q7Y0A2;A2XK84;A0A0E0GR81	Os03g0656100 protein (Fragment);Hsp20/alpha crystallin family protein, expressed;Uncharacterized protein OSJNBa0075A22.27;Uncharacterized protein;Uncharacterized protein	LOC_Os03g45340;Os03g0656100 OSNPB_030656100;OsI_12856;OSJNBa0075A22.27 OsJ_11958	2.05957	0.373901	up	2.04234	1	17507000	0	0	0	0	0	4.12702	1	1	1	1	1
734	Q10FE5;Q6ASX7;A0A0E0GRM3;A0A0P0W1Y6;B8AP37;O22390;O22384;A0A0P0W1U8;Q10FE7;O04432;A6N1S5;A6N1U7;A6N0Q8;H2KX69	Q10FE5;Q6ASX7;A0A0E0GRM3;A0A0P0W1Y6;B8AP37;O22390;O22384;A0A0P0W1U8;Q10FE7;O04432	Retrotransposon protein, putative, Ty1-copia subclass, expressed;Glycine-rich RNA binding protein;Uncharacterized protein;Os03g0670700 protein;Uncharacterized protein;Glycine-rich protein;Glycine-rich protein;Os03g0670700 protein;Os03g0670700 protein;Glyci	LOC_Os03g46770;LOC_Os03g46770 Os03g0670700 OSNPB_030670700;LOC_Os12g43600;Os03g0670700 LOC_Os03g46770 B1130H05.5 OSNPB_030670700;Os03g0670700 OSNPB_030670700;OSGRP1;OsI_12955	1.98708	0.373901	up	1.99065	1	0	9018600	0	0	0	0	1	3.97195	1	1	1	1
735	B8API8;Q10F47;B9FAL3;A0A0E0GRV8;A0A0E0GRW0;A0A0E0GRV7;A0A0E0GRV9	B8API8;Q10F47;B9FAL3;A0A0E0GRV8;A0A0E0GRW0;A0A0E0GRV7;A0A0E0GRV9	Uncharacterized protein;SABRE, putative, expressed;Uncharacterized protein;Uncharacterized protein;Uncharacterized protein;Uncharacterized protein;Uncharacterized protein	LOC_Os03g47760;OsI_13034;OsJ_12121	1.2228	0.373901	up	1.29018	1	1672300	0	0	0	0	0	1.87055	1	1	1	1	1
736	A0A0E0GS23;A0A0E0GS24;B8APM0;Q6AVV6;A3ALJ1;A0A0E0GS26;A0A0P0W1L8;A0A0E0GS25	A0A0E0GS23;A0A0E0GS24;B8APM0;Q6AVV6;A3ALJ1;A0A0E0GS26;A0A0P0W1L8	Uncharacterized protein;Uncharacterized protein;Uncharacterized protein;Nitrate transporter, putative;Uncharacterized protein;Uncharacterized protein;Os03g0687000 protein	Os03g0687000 OSNPB_030687000;OsI_13072;OsJ_12153;OSJNBb0024N19.9 Os03g0687000 LOC_Os03g48180 OSNPB_030687000	6.72617	0.28619	up	8.20384	5.45406	174810000	198000000	237510000	80515000	13026000	0	8.15161	8.18111	8.2788	8.02376	7.33841	1
738	Q6AV57;A2XKV5;A0A0E0GS55	Q6AV57;A2XKV5;A0A0E0GS55	Os03g0691400 protein;Uncharacterized protein;Uncharacterized protein	LOC_Os03g48480 Os03g0691400 OsJ_12176 OSJNBb0101N11.4 OSNPB_030691400;OsI_13094	102.903	1.80755e-09	up	7.68515	1	65944000	69936000	79788000	0	0	0	7.65245	7.66244	7.74055	1	1	1
739	Q851I6;Q10EV9;A2XKW5;A0A0E0GS68;A0A0E0GS67	Q851I6;Q10EV9;A2XKW5;A0A0E0GS68;A0A0E0GS67	Expressed protein;Expressed protein;Uncharacterized protein;Uncharacterized protein;Uncharacterized protein	Os03g0692700 LOC_Os03g48626 OsJ_12187 OSJNBb0021O11.26 OSJNBb0101N11.19 OSNPB_030692700;Os03g0692700 LOC_Os03g48626 OSNPB_030692700;OsI_13105	2.09589	0.373901	up	2.06756	1	0	26610000	0	0	0	0	1	4.20268	1	1	1	1
740	Q851J4;A2XKW7;Q10EV2;A0A0E0GS73;A0A0E0GS74;A3ALM8	Q851J4;A2XKW7;Q10EV2;A0A0E0GS73;A0A0E0GS74;A3ALM8	Uncharacterized protein OSJNBb0021O11.18;Uncharacterized protein;Expressed protein;Uncharacterized protein;Uncharacterized protein;Uncharacterized protein	Os03g0693400 LOC_Os03g48710 Os03g0693400 OSNPB_030693400;OsI_13107;OsJ_12189;OSJNBb0021O11.18	2.04273	0.373901	up	2.0305	1	0	0	15090000	0	0	0	1	1	4.0915	1	1	1
741	A0A0E0GS92;B8APY8	A0A0E0GS92;B8APY8	Uncharacterized protein;Uncharacterized protein	OsI_13120	1.97027	0.373901	up	1.9784	1	6987600	0	0	0	0	0	3.93519	1	1	1	1	1
744	A0A0E0GSH2;Q75IA5;B8AQA7;Q0DPA4	A0A0E0GSH2;Q75IA5;B8AQA7;Q0DPA4	Uncharacterized protein;30S ribosomal protein S13, putative, expressed;Uncharacterized protein;Os03g0704000 protein	Os03g0704000;OsI_13197;OSJNBa0004L11.5 Os03g0704000 LOC_Os03g49710 OsJ_12269 OSNPB_030704000	8.8852	7.88619e-08	up	4.1514	1	21412000	15403000	24367000	0	0	0	4.17443	4.08494	4.19484	1	1	1
745	Q75IA6;A2XL53;A0A0E0GSH3;A0A0P0W2S8	Q75IA6;A2XL53;A0A0E0GSH3;A0A0P0W2S8	Os03g0704100 protein;Uncharacterized protein;Uncharacterized protein;Os03g0704100 protein (Fragment)	Os03g0704100 OSNPB_030704100;OsI_13198;OSJNBa0004L11.4 LOC_Os03g49720 Os03g0704100 OsJ_12270	1.15818	0.00129263	up	8.01024	7.79838	131960000	144450000	131720000	41470000	43275000	46374000	7.99641	8.04332	7.99099	7.77472	7.78141	7.83901
746	Q10E52;B9FB43;B8AQB7;A0A0E0GSJ8	Q10E52;B9FB43;B8AQB7;A0A0E0GSJ8	Chloroplast outer membrane translocon subunit, putative, expressed;Uncharacterized protein;Uncharacterized protein;Uncharacterized protein	Os03g0707900 LOC_Os03g50010 Os03g0707900 OSJNBb0022E02.6 OSNPB_030707900;OsI_13214;OsJ_12287	1.58005	0.812737	up	6.39887	5.7389	64649000	37014000	27822000	0	110350000	85757000	7.64607	7.3251	4.22542	1	8.15331	8.06339
748	Q10E40;B8AQC2;A0A0E0GSL0;Q53RK3	Q10E40;B8AQC2;A0A0E0GSL0;Q53RK3	MAPEG family protein, expressed;Uncharacterized protein;Uncharacterized protein;MAPEG family, putative	LOC_Os03g50130 Os03g0709000 OsJ_12298 OSNPB_030709000;OsI_13225	4.33944	0.538301	up	5.38134	3.26383	0	56666000	58528000	43692000	0	0	1	7.57014	7.57388	7.79149	1	1
752	Q8W317;A0A0E0GSQ9;B8AQR2;A0A0P0W348;B8AQR3;A0A0P0W251	Q8W317;A0A0E0GSQ9;B8AQR2	NADH-ubiquinone oxidoreductase 75 kDa subunit, mitochondrial, putative, expressed;Uncharacterized protein;Uncharacterized protein	LOC_Os03g50540 Os03g0713400 OsJ_12335 OSJNBa0014G15.3 OSNPB_030713400;Os03g0713400 OSNPB_030713400;OsI_13269;OsI_13270	7.79764	0.289737	up	8.82341	5.86037	839550000	778560000	933910000	161840000	143970000	0	8.83045	8.79069	8.84909	8.30501	8.27611	1
757	A0A0E0GSY8;B9FB85;B8AQQ2;Q6ASV4;Q8LLP2;A0A0P0W308;B8AQP6	A0A0E0GSY8;B9FB85;B8AQQ2;Q6ASV4;Q8LLP2	Glutamate decarboxylase;Glutamate decarboxylase;Glutamate decarboxylase;Glutamate decarboxylase;Glutamate decarboxylase	B1377B10.13 LOC_Os03g51080 Os03g0720300 OSNPB_030720300;Os03g0720300 OSNPB_030720300;OsI_13312;OsI_13319;OsJ_12378;OSJNBa0031O09.06	18.4807	0.0163668	up	5.20795	1	17565000	36982000	22242000	0	0	0	4.12772	7.32099	4.17514	1	1	1
761	A0A0P0W3I8;Q851E2;Q0DNW1;Q10DF1;B8AR19;A0A0E0GTB3;B9FBC9	A0A0P0W3I8;Q851E2;Q0DNW1;Q10DF1;B8AR19;A0A0E0GTB3;B9FBC9	Os03g0730800 protein;Putative P-type ATPase;Calcium-transporting ATPase;Calcium-transporting ATPase;Calcium-transporting ATPase;Calcium-transporting ATPase;Calcium-transporting ATPase	LOC_Os03g52090;Os03g0730800;Os03g0730800 OSNPB_030730800;OsI_13389;OsJ_12452;OSJNBb0011H13.18	1.93906	0.373901	up	1.95536	1	0	5546900	0	0	0	0	1	3.86607	1	1	1	1
763	Q6I583;A0A0E0GTC9;A2Y804;A6N138	Q6I583;A0A0E0GTC9;A2Y804	Os05g0585900 protein;Uncharacterized protein;Uncharacterized protein	Os05g0585900 OsJ_19712 OSJNBa0009C07.13 OSNPB_050585900;OsI_21172	1.02838	0.739488	up	8.18308	8.1427	291760000	174780000	159340000	154430000	80052000	101020000	8.34994	8.1214	8.07791	8.28296	8.02376	8.1214
764	A0A0E0GTD5;A0A0E0GTD6	A0A0E0GTD5;A0A0E0GTD6	Uncharacterized protein;Uncharacterized protein		2.02195	0.373901	up	2.01575	1	12440000	0	0	0	0	0	4.04724	1	1	1	1	1
765	B9FBN6;A0A0E0GTG7;B8AR31;Q6AVT2	B9FBN6;A0A0E0GTG7;B8AR31;Q6AVT2	Uncharacterized protein;Glucose-1-phosphate adenylyltransferase;Glucose-1-phosphate adenylyltransferase;Glucose-1-phosphate adenylyltransferase large subunit 1, chloroplastic/amyloplastic	AGPL1 APL1 Os03g0735000 LOC_Os03g52460 OSJNBa0027J18.8;OsI_13419;OsJ_12478	1.99884	0.373901	up	1.99917	1	0	10228000	0	0	0	0	1	3.9975	1	1	1	1
766	Q6AVS5;B8AR34;B9FBN9;A0A0E0GTG9;A0A0N7KI03	Q6AVS5;B8AR34;B9FBN9;A0A0E0GTG9;A0A0N7KI03	Expressed protein;Uncharacterized protein;Uncharacterized protein;Uncharacterized protein;Os03g0735300 protein (Fragment)	Os03g0735300 OSNPB_030735300;OsI_13422;OsJ_12481;OSJNBa0027J18.5 LOC_Os03g52490 Os03g0735300 OSNPB_030735300	3.23422	0.558151	up	5.13649	3.44307	31263000	17604000	14297000	171890000	0	0	7.21085	4.1183	4.08034	8.32922	1	1
770	A0A0E0GTN2;B9FBT5;B8AJV7;Q10CX4;Q9XEA8	A0A0E0GTN2;B9FBT5;B8AJV7;Q10CX4;Q9XEA8	Cysteine synthase;Cysteine synthase;Cysteine synthase;Cysteine synthase;Cysteine synthase	LOC_Os03g53650;OsI_13501;OsJ_12564;RCS3 Os03g0747800 LOC_Os03g53650 OJ1124_H03.2 OSJNBa0069E14.1	8.66316	6.3589e-07	up	4.11489	1	24490000	10883000	18609000	0	0	0	4.20175	4.00959	4.13334	1	1	1
771	A0A0P0W3F3;A0A0E0GTN4;Q10CW7;B8AJV8;Q8W311	A0A0P0W3F3;A0A0E0GTN4;Q10CW7;B8AJV8;Q8W311	Os03g0748000 protein (Fragment);Uncharacterized protein;Os03g0748000 protein;Uncharacterized protein;Putative RNA-binding protein	Os03g0748000 LOC_Os03g53670 Os03g0748000 OsJ_12565 OSNPB_030748000;Os03g0748000 OSNPB_030748000;OsI_13502;OSJNBa0069E14.2	4.36905	0.11612	up	3.12732	1	24237000	24322000	0	0	0	0	4.20017	4.1818	1	1	1	1
772	Q84PW3;B8BAQ6;B9FZ36;A0A0E0GTQ3;A0A0E0GTQ1;A0A0E0GTQ2;A0A0E0GTQ0	Q84PW3;B8BAQ6;B9FZ36;A0A0E0GTQ3;A0A0E0GTQ1;A0A0E0GTQ2;A0A0E0GTQ0	Monodehydroascorbate reductase 5, chlorplastic;Uncharacterized protein;Uncharacterized protein;Uncharacterized protein;Uncharacterized protein;Uncharacterized protein;Uncharacterized protein	MDAR5 MDHAR5 Os08g0151800 LOC_Os08g05570 OJ1349_D05.106 P0443G08.138;OsI_27818;OsJ_26055	4.55207	0.373901	up	3.18652	1	0	55897000	0	0	0	0	1	7.55957	1	1	1	1
773	Q10CU9;A2XM08;A0A0E0GTS1;A0A0N7KI20;B9ET88;Q94ED2;A0A0E0FTR8;B8AA56	Q10CU9;A2XM08;A0A0E0GTS1;A0A0N7KI20	Glycosyl hydrolase family 3 N terminal domain containing protein, expressed;Uncharacterized protein;Uncharacterized protein;Os03g0749300 protein (Fragment)	Os01g0771900 Os01g0771900 OSNPB_010771900 P0665A11.38 P0695H10.9;Os03g0749300 OSNPB_030749300;OsI_03907;OsI_13515;OsJ_03617;OSJNBa0069E14.7 LOC_Os03g53800 Os03g0749300 OsJ_12577 OSNPB_030749300	22.991	0.117405	up	7.79079	3.2678	99773000	51443000	135240000	45120000	0	0	7.85368	7.51283	8.00587	7.80339	1	1
774	A3AMQ8;Q0DNI8;A0A0E0GTT9;Q75LL5;A2XM15	A3AMQ8;Q0DNI8;A0A0E0GTT9;Q75LL5;A2XM15	Uncharacterized protein;Os03g0750700 protein;Uncharacterized protein;Putative strictosidine synthase;Uncharacterized protein	Os03g0750700 Os03g0750700 OSNPB_030750700;OsI_13523;OsJ_12584;OSJNBa0047E24.22 LOC_Os03g53950	1.0484	0.496866	up	7.90485	7.83667	112460000	102680000	119900000	50402000	71212000	29662000	7.90704	7.85034	7.95717	7.85474	7.97571	7.67955
775	Q9FNU5;A2XM39;A0A0E0GTY0	Q9FNU5;A2XM39;A0A0E0GTY0	36I5.1;Uncharacterized protein;Uncharacterized protein	OsI_13551;OSJNBb0081K01.22 LOC_Os03g54760 Os03g0754800 OsJ_30972 OSNPB_030754800	96.4419	1.39008e-09	up	7.59159	1	59067000	65070000	55764000	0	0	0	7.59999	7.63133	7.54344	1	1	1
780	Q0DNC5;Q94H99;A2XM80;A0A0E0GU44	Q0DNC5;Q94H99;A2XM80;A0A0E0GU44	Os03g0761000 protein;Os03g0761000 protein;Uncharacterized protein;Uncharacterized protein	Os03g0761000;Os03g0761000 LOC_Os03g55310 OSJNBb0048A17.21 OSNPB_030761000;OsI_13627	7.75807	2.01133e-08	up	3.9557	1	7039300	7461500	9977700	0	0	0	3.93796	3.92877	4.00037	1	1	1
781	Q9AR27;B6F107;B9F5U3;B8AK92;A0A0E0GU55	Q9AR27;B6F107;B9F5U3;B8AK92;A0A0E0GU55	Casein kinase II subunit alpha-2;Casein kinase II subunit alpha-2;Uncharacterized protein;Uncharacterized protein;50S ribosomal protein L14, chloroplastic	HD6 CKA2;OsI_13634;OsJ_12682;rpl14	2.08166	0.373901	up	2.05773	1	21244000	0	0	0	0	0	4.1732	1	1	1	1	1
782	A3AN14;Q7Y0C8;Q10EK5;A2XMB9;A0A0E0GU92	A3AN14;Q7Y0C8;Q10EK5;A2XMB9;A0A0E0GU92	Uncharacterized protein;Allene oxide synthase 1, chloroplastic;AOS;Uncharacterized protein;Uncharacterized protein	CYP74A1 AOS1 Os03g0767000 LOC_Os03g55800 OSJNBa0079B15.7 OSJNBb0106M04.24;OsI_13668;OsJ_12717;PRECOCIOUS PRE LOC_Os03g55800 Os03g0767000	37.9805	0.00669897	up	6.24719	1	36599000	32027000	26471000	0	0	0	7.34493	7.18112	4.21551	1	1	1
783	Q7XZW5;A2XME9;A0A0E0GUE5;A0A0E0GUE4;Q42972;Q0ILQ0;B8BN58;A0A0E0GIC3	Q7XZW5;A2XME9;A0A0E0GUE5;A0A0E0GUE4	Malate dehydrogenase;Malate dehydrogenase;Uncharacterized protein;Uncharacterized protein	LOC_Os03g56280 Os03g0773800 OsJ_12762 OSJNBb0094O03.16 OSNPB_030773800;Os12g0632700;Os12g0632700 LOC_Os12g43630 OsJ_36976;OsI_13699;OsI_39238	260.625	1.08875e-09	up	9.02583	1	1354300000	1359300000	1214000000	0	0	0	9.0677	9.04079	8.969	1	1	1
784	A3AN61;Q8H8N3;A2XMF8;A0A0E0GUF9	A3AN61;Q8H8N3;A2XMF8;A0A0E0GUF9	Uncharacterized protein;S-adenosyl-L-methionine-dependent tRNA 4-demethylwyosine synthase;Uncharacterized protein;Uncharacterized protein	OsI_13711;OsJ_12772;TYW1 Os03g0775300 LOC_Os03g56390 OSJNBa0070N04.14	4.11393	0.116117	up	3.04052	1	0	13339000	13256000	0	0	0	1	4.05713	4.06442	1	1	1
785	Q10CE4;B8AKX6;A0A0E0GUL2;A0A0E0GUL1;B8AKX5;O22544	Q10CE4;B8AKX6;A0A0E0GUL2;A0A0E0GUL1;B8AKX5	Peroxisomal (S)-2-hydroxy-acid oxidase GLO1;Peroxisomal (S)-2-hydroxy-acid oxidase GLO1;Uncharacterized protein;Uncharacterized protein;Uncharacterized protein	GLO1 GOX Os03g0786100 LOC_Os03g57220 OsJ_12861;GLO1 OsI_13800;GOX;OsI_13796	2.07285	5.87836e-05	up	9.73212	8.68051	7035700000	6747800000	5384700000	434280000	361300000	388380000	9.77266	9.79817	9.62554	8.72964	8.65594	8.65594
786	A0A0E0GUL9;Q6F3B7;A3ANE2;A2XMN8	A0A0E0GUL9;Q6F3B7;A3ANE2;A2XMN8	tRNA (guanine(26)-N(2))-dimethyltransferase;tRNA (guanine(26)-N(2))-dimethyltransferase;tRNA (guanine(26)-N(2))-dimethyltransferase;tRNA (guanine(26)-N(2))-dimethyltransferase	LOC_Os03g57280 Os03g0786700 OSJNBb0024J04.3 OSNPB_030786700;OsI_13804;OsJ_12865	9.02178	8.69992e-08	up	4.17341	1	24702000	27802000	16046000	0	0	0	4.20329	4.21297	4.10398	1	1	1
791	Q7Y1I5;A0A0E0GUX4;A2XMW9	Q7Y1I5;A0A0E0GUX4;A2XMW9	Os03g0796501 protein;Uncharacterized protein;Uncharacterized protein	OsI_13894;OSJNBa0094F01.24 OSJNBb0021G19.4 Os03g0796501 OsJ_12950 OSNPB_030796501	137.925	1.01343e-07	up	8.10775	1	155980000	231850000	124740000	0	0	0	8.09761	8.25291	7.97271	1	1	1
792	Q0D852;Q851P5;P31674;B9FVV5;A6MZB5;A2YIV1;A0A0E0HXI2;A2XMY4;A0A0E0GV00;B9F6H3	Q0D852;Q851P5;P31674;B9FVV5;A6MZB5;A2YIV1;A0A0E0HXI2;A2XMY4;A0A0E0GV00;B9F6H3	Os07g0184300 protein;40S ribosomal protein S15, putative, expressed;40S ribosomal protein S15;Uncharacterized protein;40S ribosomal protein S15;Uncharacterized protein;Uncharacterized protein;Uncharacterized protein;Uncharacterized protein;Uncharacterized	Os07g0184300;OsI_13912;OsI_25153;OsJ_12967;OsJ_23352;OSJNBa0052F07.28 OSJNBa0094F01.1 LOC_Os03g58430 Os03g0798600 OSNPB_030798600;RPS15 Os07g0184300 LOC_Os07g08660 OJ1046_F10.119	17.6568	0.0133752	up	5.14215	1	30060000	20345000	22525000	0	0	0	7.10075	4.14733	4.17836	1	1	1
794	Q10C01;B9F6H6;Q851Q6;B8ALC2;A0A0E0GV10	Q10C01;B9F6H6;Q851Q6;B8ALC2;A0A0E0GV10	GTP1/OBG family protein, expressed;Uncharacterized protein;Probable GTP-binding protein OBGC2;Uncharacterized protein;Uncharacterized protein	LOC_Os03g58540;Os03g0799700 LOC_Os03g58540 OSJNBa0052F07.17;OsI_13922;OsJ_12974	38.1058	0.00764007	up	6.25194	1	31717000	40201000	19388000	0	0	0	7.23395	7.38079	4.14108	1	1	1
795	Q851R5;B8ALD1;A0A0E0GV23	Q851R5;B8ALD1;A0A0E0GV23	Thioredoxin H2-2;Thioredoxin;Thioredoxin	Os03g0800700 LOC_Os03g58630 OsJ_12982 OSJNBa0052F07.8;OsI_13929	9.22613	8.68618e-10	up	4.20573	1	24957000	24696000	27817000	0	0	0	4.2055	4.18658	4.2251	1	1	1
797	A0A0E0GV34;Q10BX5;B8ALU1;B9F6I4;Q84T11	A0A0E0GV34;Q10BX5;B8ALU1;B9F6I4;Q84T11	Uncharacterized protein;Expressed protein;Uncharacterized protein;Uncharacterized protein;Uncharacterized protein OSJNBa0087C10.19	Os03g0801900 LOC_Os03g58740 Os03g0801900 OSNPB_030801900;OsI_13936;OsJ_12989;OSJNBa0087C10.19	4.05653	0.11617	up	3.02025	1	13329000	10153000	0	0	0	0	4.06547	3.99526	1	1	1	1
800	Q75HJ3;C6F1N7;B8ALS4;A0A0E0GV67	Q75HJ3;C6F1N7;B8ALS4;A0A0E0GV67	Os03g0804800 protein;TCP-1/cpn60 chaperonin;Uncharacterized protein;Uncharacterized protein	Os03g0804800 LOC_Os03g59020 Os03g0804800 OsJ_13014 OSJNBb0015I02.11 OSNPB_030804800;OsI_13967	90.0364	2.61691e-09	up	7.49244	1	49070000	43531000	51748000	0	0	0	7.52412	7.43314	7.52005	1	1	1
801	B9G973;Q0IUX9;B8BLT7;A3CEJ6;Q2QYB3;B9G965;C7J9C8;A0A0P0XYA6;A0A0E0GV85;A0A0E0IXP2;Q2RB20;Q2RB46;B8BLT6;B8AES6;Q2QYB0;B8BLU0;A0A0E0GV86	B9G973;Q0IUX9;B8BLT7;A3CEJ6;Q2QYB3;B9G965;C7J9C8;A0A0P0XYA6;A0A0E0GV85;A0A0E0IXP2;Q2RB20;Q2RB46;B8BLT6;B8AES6;Q2QYB0;B8BLU0;A0A0E0GV86	Uncharacterized protein;Os11g0129000 protein;Uncharacterized protein;Uncharacterized protein;MatE family protein, expressed;Uncharacterized protein;Os11g0128900 protein;Protein DETOXIFICATION (Fragment);Protein DETOXIFICATION;Protein DETOXIFICATION;Protein	LOC_Os11g03500;LOC_Os12g03230 Os12g0125800;Os11g0126100 LOC_Os11g03240 Os11g0126100 OSNPB_110126100;Os11g0128900;Os11g0129000;Os11g0129000 OSNPB_110129000;Os12g0126000 LOC_Os12g03260 Os12g0126000 OsJ_35077 OSNPB_120126000;OsI_07920;OsI_37322;OsI_37323;OsI_37326;OsJ_32800;OsJ_32812;OsJ_35074	7.59747	3.67553e-09	up	3.92552	1	7337600	7405000	6277700	0	0	0	3.94998	3.92695	3.89962	1	1	1
802	Q84M59;A0A0E0GVC7;Q10BR1;A0A0P0W4K0;A2XN62	Q84M59;A0A0E0GVC7;Q10BR1;A0A0P0W4K0;A2XN62	Expressed protein;Uncharacterized protein;Expressed protein;Os03g0807700 protein (Fragment);Uncharacterized protein	LOC_Os03g59300;Os03g0807700 LOC_Os03g59300 Os03g0807700 OsJ_13041 OSJNBa0059E14.9 OSNPB_030807700;Os03g0807700 OSNPB_030807700;OsI_13995	1.51789	0.373901	up	1.60207	1	0	2138500	0	0	0	0	1	2.80621	1	1	1	1
803	Q84M35;A2XN63;A0A0E0GVC8;B9F6V9;A2XN57;B9FW41	Q84M35;A2XN63;A0A0E0GVC8;B9F6V9	40S ribosomal protein S2, putative, expressed;Uncharacterized protein;Uncharacterized protein;Uncharacterized protein	Os03g0807800 LOC_Os03g59310 Os03g0807800 OSJNBa0059E14.8 OSNPB_030807800;OsI_13989;OsI_13996;OsJ_13042;OsJ_23506	28.0584	0.107947	up	8.13799	3.32763	125000000	277240000	167500000	71284000	0	0	7.95835	8.35185	8.10376	7.98289	1	1
805	A0A0N7KI96;A0A0E0GVF7;Q6ATS0;B8AMB8	A0A0N7KI96;A0A0E0GVF7;Q6ATS0;B8AMB8	Mg-protoporphyrin IX chelatase (Fragment);Mg-protoporphyrin IX chelatase;Magnesium-chelatase subunit ChlD, chloroplastic;Magnesium-chelatase subunit ChlD, chloroplastic	CHLD CHL1 Os03g0811100 LOC_Os03g59640 OsJ_13066 OSJNBa0028F23.2 OSJNBb0033J23.6;CHLD CHL1 OsI_14020;Os03g0811100 OSNPB_030811100	134.188	1.10159e-11	up	8.06811	1	142040000	161120000	155290000	0	0	0	8.05988	8.08457	8.05988	1	1	1
806	A0A0E0GVG4;Q7XZG9;Q1KL26;B9F6X2;B8AM85	A0A0E0GVG4;Q7XZG9;Q1KL26;B9F6X2;B8AM85	Peptidyl-prolyl cis-trans isomerase;Peptidyl-prolyl cis-trans isomerase;Peptidyl-prolyl cis-trans isomerase;Peptidyl-prolyl cis-trans isomerase;Peptidyl-prolyl cis-trans isomerase	Os03g0811600 LOC_Os03g59700 Os03g0811600 OSJNBb0033J23.12 OSNPB_030811600;OsI_14027;OsJ_13071	7.52836	2.05751e-07	up	3.91234	1	9214700	5675900	5550800	0	0	0	3.99161	3.87369	3.8717	1	1	1
808	B9F6Z5;Q8L4F2;A2WWQ4;A0A0E0GVL8;A2ZZB2;A0A0P0VA20;A0A0E0IQX4;A0A0P0XT53;B8BGD5;Q8S6I4;A3C3W1;Q0IY94;Q8LM39;A0A0E0IQY6;A0A0E0IQY7	B9F6Z5;Q8L4F2;A2WWQ4;A0A0E0GVL8;A2ZZB2;A0A0P0VA20;A0A0E0IQX4;A0A0P0XT53;B8BGD5;Q8S6I4;A3C3W1;Q0IY94;Q8LM39;A0A0E0IQY6;A0A0E0IQY7	Uncharacterized protein;40S ribosomal protein S23;Uncharacterized protein;Uncharacterized protein;Uncharacterized protein;Os01g0834600 protein (Fragment);Uncharacterized protein;Os10g0350450 protein;Uncharacterized protein;Putative 40s ribosomal protein S2	LOC_Os10g20990 OSJNAb0078C13.24;OJ1754_E06.3 LOC_Os03g60400 Os01g0834500 Os01g0834601 Os03g0818400 OSJNBa0094J08.4 OSNPB_010834500 OSNPB_030818400 P0460C04.38 P0460C04.39 P0506B12.5 P0506B12.6;Os01g0834600 OSNPB_010834600;Os10g0350400;Os10g0350450 OSNPB_100350450;OsI_04329 OsI_14082;OsI_33181;OsJ_03983;OsJ_13124;OsJ_31191;OSJNBb0023M11.9	135.987	7.30017e-11	up	8.08732	1	158110000	156240000	161910000	0	0	0	8.10909	8.06339	8.0895	1	1	1
809	Q84T92;A2XNF0;A0A0E0GVM8	Q84T92;A2XNF0;A0A0E0GVM8	Chalcone--flavonone isomerase;Chalcone--flavonone isomerase;Chalcone-flavonone isomerase family protein	CHI CFI Os03g0819600 LOC_Os03g60509 OJ1754_E06.14;CHI CFI OsI_013593	1.95945	0.373901	up	1.97045	1	0	0	6676800	0	0	0	1	1	3.91135	1	1	1
810	Q84TA1;A0A0E0GVP0;B8AMB5	Q84TA1;A0A0E0GVP0;B8AMB5	Heat shock cognate 70 kDa protein 2, putative, expressed;Uncharacterized protein;Uncharacterized protein	OJ1754_E06.25 LOC_Os03g60620 Os03g0821100 OsJ_13143 OSNPB_030821100;OsI_14101	4.21051	0.116118	up	3.074	1	16634000	16636000	0	0	0	0	4.11631	4.10567	1	1	1	1
811	C7J066;Q852B0;Q10BC6;A0A0E0GVR1;A0A0E0GVR0;B8AMC6	C7J066;Q852B0;Q10BC6;A0A0E0GVR1;A0A0E0GVR0;B8AMC6	Os03g0823100 protein (Fragment);Putative sugar transporter protein;Sugar transporter family protein, putative, expressed;Uncharacterized protein;Uncharacterized protein;Uncharacterized protein	LOC_Os03g60820;Os03g0823200 Os03g0823100 OSNPB_030823100;OsI_14118;OSJNBb0081B07.15	24.0633	0.00787686	up	5.58877	1	27463000	30159000	38473000	0	0	0	4.22351	5.17508	7.3677	1	1	1
813	B8BF09;A0A0N7KIB2;A0A0P0XL08;Q852B5;A0A0E0GVT1;Q6H5A2;A2Z0R3;A0A0E0II01;Q6ZIE6;Q6Z7R7;Q2A0M6;B8AIE1;A0A0E0HLE2;B8BAU7;A0A0E0IBY5;A2XNI2;A3AP75	B8BF09;A0A0N7KIB2;A0A0P0XL08;Q852B5;A0A0E0GVT1;Q6H5A2;A2Z0R3;A0A0E0II01;Q6ZIE6;Q6Z7R7;Q2A0M6;B8AIE1;A0A0E0HLE2;B8BAU7;A0A0E0IBY5;A2XNI2;A3AP75	Uncharacterized protein;Os03g0823800 protein (Fragment);Os09g0381100 protein (Fragment);Os03g0823800 protein;Uncharacterized protein;Os09g0381100 protein;Uncharacterized protein;Uncharacterized protein;Os08g0420600 protein;Os02g0741800 protein;Root uracil	Os02g0741800 Os02g0741800 OsJ_08338 OSNPB_020741800 P0516G10.32 P0585G03.10;Os03g0823800 OSNPB_030823800;Os08g0420600 Os08g0420600 OJ1188_F05.18 OsJ_27344 OSNPB_080420600;Os09g0381100 Os09g0381100 OsJ_29191 OSNPB_090381100 P0027G10.52;Os09g0381100 OSNPB_090381100;OsI_08888;OsI_14125;OsI_29273;OsI_31190;OsI_31191;OsJ_13173;OSJNBb0081B07.9 LOC_Os03g60880 Os03g0823800 OSNPB_030823800;rup1	1.97727	0.373901	up	1.98351	1	0	0	8265700	0	0	0	1	1	3.95054	1	1	1
814	B8AMP4;A0A0E0GVT5;Q10BB3;Q10BB4	B8AMP4;A0A0E0GVT5;Q10BB3;Q10BB4	Uncharacterized protein;Uncharacterized protein;Dolichol-phosphate mannosyltransferase, putative, expressed;Dolichol-phosphate mannosyltransferase, putative, expressed	LOC_Os03g60939;Os03g0824400 LOC_Os03g60939 Os03g0824400 OsJ_13178 OSNPB_030824400;OsI_14131	7.24017	1.76604e-06	up	3.85602	1	5732300	3373200	8330300	0	0	0	3.88738	3.72826	3.95243	1	1	1
815	A0A0P0W5E1;B9F731;B8AMP9;A0A0E0GVU8;Q10BA5	A0A0P0W5E1;B9F731;B8AMP9;A0A0E0GVU8;Q10BA5	Os03g0825700 protein (Fragment);Uncharacterized protein;Uncharacterized protein;Uncharacterized protein;Defective in exine formation protein, putative, expressed	OJ1111_B11.16 LOC_Os03g61050 Os03g0825700 OSNPB_030825700;Os03g0825700 OSNPB_030825700;OsI_14141;OsJ_13190	37.9001	0.00665381	up	6.24413	1	31641000	27961000	33530000	0	0	0	7.23274	4.21551	7.28414	1	1	1
817	Q0DM51;A0A0E0GVW4;B8AMQ6;B9F737;A0A0P0W5N0;Q8L7S8	Q0DM51;A0A0E0GVW4;B8AMQ6;B9F737;A0A0P0W5N0	DEAD-box ATP-dependent RNA helicase 3, chloroplastic;Uncharacterized protein;Uncharacterized protein;Uncharacterized protein;Os03g0827700 protein (Fragment)	Os03g0827700 LOC_Os03g61220 OSJNBa0010E04.4;Os03g0827700 OSNPB_030827700;OsI_14162;OsJ_13207;RH3 EMB1138 At5g26742 F21E10.1 T7I7.6	9.18904	9.43917e-10	up	4.19991	1	25110000	23835000	26285000	0	0	0	4.20788	4.17755	4.21431	1	1	1
818	Q8SAY0;A2XNL2;A0A0E0GVW8;Q10B70	Q8SAY0;A2XNL2;A0A0E0GVW8;Q10B70	50S ribosomal protein L18, chloroplastic;Uncharacterized protein;Uncharacterized protein;50S ribosomal protein L18, chloroplast, putative, expressed	LOC_Os03g61260;OsI_14156;RPL18 Os03g0828100 LOC_Os03g61260 OsJ_13209 OSJNBa0010E04.3	28.4398	0.0825858	up	7.90988	3.08004	157870000	40595000	220030000	0	9892100	0	8.1057	7.39233	8.23162	1	7.24013	1
819	B7EIW8;Q10B63;A0A0E0GVX5;A2XNL0	B7EIW8;Q10B63;A0A0E0GVX5;A2XNL0	cDNA clone:001-207-H12, full insert sequence;Probable acylpyruvase FAHD2, mitochondrial;Uncharacterized protein;Uncharacterized protein	FAHD2 Os03g0829000 LOC_Os03g61330 OsJ_13211 OSJNBa0010E04.1 OSJNBb0027B08.34;OsI_14154	1.50337	0.373901	up	1.5882	1	2723900	0	0	0	0	0	2.76459	1	1	1	1	1
820	Q850Z8;B8AMR2;B9F7E5;A0A0E0GVZ3	Q850Z8;B8AMR2;B9F7E5;A0A0E0GVZ3	Os03g0831500 protein;Uncharacterized protein;Uncharacterized protein;Uncharacterized protein	OsI_14182;OsJ_13230;OSJNBb0027B08.7 LOC_Os03g61600 Os03g0831500 OSJNBa0078D06.21 OSNPB_030831500	2.02195	0.373901	up	2.01575	1	0	12691000	0	0	0	0	1	4.04724	1	1	1	1
821	Q75LJ3;A2XNR6;A0A0E0GW30	Q75LJ3;A2XNR6;A0A0E0GW30	Electron transfer flavoprotein subunit alpha, mitochondrial;Electron transfer flavoprotein subunit alpha, mitochondrial;Uncharacterized protein	ETFA Os03g0835400 LOC_Os03g61920 OsJ_012687 OSJNBa0096I06.15;ETFA OsI_013709	1.96669	0.373901	up	1.97577	1	0	0	7361200	0	0	0	1	1	3.92731	1	1	1
824	A0A0E0GW35;Q10AZ4;B8AMT7;A2XNS1;P0C539;A3C6D7;A0A0E0H4X6;A2Z986	A0A0E0GW35;Q10AZ4;B8AMT7;A2XNS1;P0C539;A3C6D7;A0A0E0H4X6;A2Z986	Uncharacterized protein;Actin-3;Uncharacterized protein;Actin-3;Actin-2;Actin-2;Uncharacterized protein;Uncharacterized protein	ACT2 AC2 RAC2;ACT2 AC2 RAC2 Os10g0510000 LOC_Os10g36650 OsJ_030859 OSJNBa0005K07.1;ACT3 AC3 RAC3 Os03g0836000 LOC_Os03g61970 OsJ_13270 OSJNBa0096I06.10;ACT3 AC3 RAC3 OsI_013714;OsI_14218;OsI_34279	115.673	3.18169e-09	up	7.85391	1	103940000	114580000	86702000	0	0	0	7.86714	7.9031	7.79149	1	1	1
825	A0A0P0W5V1;B7EDF0;A0A0P0X5H0;B8B5I2;B8B4T1;A0A0E0HZM5;Q851L8;Q6YVM4;A2XNT2;A0A0E0J9X5;A0A0E0GW49;Q69V23;A0A0E0HZM6;B9FWX1;A0A0E0HZM7;A0A0P0X536;A0A0N7KNC2	A0A0P0W5V1;B7EDF0;A0A0P0X5H0;B8B5I2;B8B4T1;A0A0E0HZM5;Q851L8;Q6YVM4;A2XNT2;A0A0E0J9X5;A0A0E0GW49;Q69V23;A0A0E0HZM6;B9FWX1;A0A0E0HZM7	Os03g0837100 protein (Fragment);Os07g0424400 protein;Cellulose synthase (Fragment);Uncharacterized protein;Cellulose synthase;Cellulose synthase;Probable cellulose synthase A catalytic subunit 5 [UDP-forming];Probable cellulose synthase A catalytic subunit	CESA3 Os07g0424400 LOC_Os07g24190 P0409D09.11;CESA5 Os03g0837100 LOC_Os03g62090 OsJ_012702 OSJNBa0042I09.26;CESA5 OsI_013725;CESA6 Os07g0252400 LOC_Os07g14850 OsJ_23733 P0669H03.13;Os03g0837100 OSNPB_030837100;Os07g0424400 OSNPB_070424400;OsI_25542;OsI_25789;OsJ_24012	59.9738	0.000149473	up	6.90626	1	41221000	30712000	31790000	0	0	0	7.41371	6.07113	7.23395	1	1	1
826	Q851M7;A0A0E0GW59;A2XNU0	Q851M7;A0A0E0GW59;A2XNU0	Lectin protein kinase family protein, putative, expressed;Uncharacterized protein;Uncharacterized protein	OsI_14238;OSJNBa0042I09.17 LOC_Os03g62180 Os03g0838100 OsJ_13290 OSNPB_030838100	3.7318	0.1162	up	2.89987	1	5833400	4175800	0	0	0	0	3.89109	3.80852	1	1	1	1
827	A0A0E0GW66;Q0DLY4;Q851N5;B8AN61;A0A0E0GW65	A0A0E0GW66;Q0DLY4;Q851N5;B8AN61;A0A0E0GW65	Ubiquinone biosynthesis monooxygenase COQ6, mitochondrial;Os03g0839100 protein (Fragment);Ubiquinone biosynthesis monooxygenase COQ6, mitochondrial;Ubiquinone biosynthesis monooxygenase COQ6, mitochondrial;Ubiquinone biosynthesis monooxygenase COQ6, mitoch	COQ6;COQ6 OsI_14244;Os03g0839100 OSNPB_030839100;OSJNBa0042I09.9 COQ6 LOC_Os03g62260 OsJ_13297	2.05106	0.373901	up	2.03637	1	0	16803000	0	0	0	0	1	4.1091	1	1	1	1
831	Q10AP0;B8AN87;Q75LB3;A0A0E0GWF2	Q10AP0;B8AN87;Q75LB3;A0A0E0GWF2	AMP-binding protein, putative, expressed;Uncharacterized protein;AMP-binding protein, putative, expressed;Uncharacterized protein	LOC_Os03g62850;OsI_14303;OSJNBa0032G11.28 LOC_Os03g62850 Os03g0845500 OsJ_13349 OSNPB_030845500	24.3387	0.00789034	up	5.60518	1	39613000	30241000	28061000	0	0	0	7.38852	5.19909	4.22793	1	1	1
832	Q84LH7;B8ANN3;A0A0E0GWI5	Q84LH7;B8ANN3;A0A0E0GWI5	Brefeldin A-sensitive Golgi protein, putative, expressed;Uncharacterized protein;Uncharacterized protein	LOC_Os03g63250 Os03g0849600 OsJ_13370 OSJNBb0096M04.45 OSNPB_030849600;OsI_14326	7.30554	2.15735e-08	up	3.86899	1	6411600	5114600	4571600	0	0	0	3.91333	3.84943	3.84422	1	1	1
834	Q8W3N3;A3APT6;Q851Y6;B8ANQ0;A0A0E0GWL3	Q8W3N3;A3APT6;Q851Y6;B8ANQ0;A0A0E0GWL3	26S proteasome regulatory particle non-ATPase subunit5 (Fragment);Uncharacterized protein;Os03g0851300 protein;Uncharacterized protein;Uncharacterized protein	Os03g0851300 LOC_Os03g63430 Os03g0851300 OSJNBa0015N08.15 OSNPB_030851300;OsI_14352;OsJ_13391;OsRPN5	3.83311	0.116143	up	2.93851	1	6893900	0	5859500	0	0	0	3.93165	1	3.88389	1	1	1
835	Q851X7;A2XP56;A0A0E0GWM7;B9F7N2	Q851X7;A2XP56;A0A0E0GWM7;B9F7N2	Derlin-2;Derlin;Derlin;Derlin	DER2 Os03g0852200 LOC_Os03g63520 OSJNBa0015N08.24;OsI_14361;OsJ_13400	2.01255	0.373901	up	2.00902	1	0	0	11201000	0	0	0	1	1	4.02707	1	1	1
836	B8ANQ9;Q0DLP2;Q84T82;A2XP72;A0A0E0GWP7	B8ANQ9;Q0DLP2;Q84T82;A2XP72;A0A0E0GWP7	Uncharacterized protein;Os03g0853800 protein;Expressed protein;Uncharacterized protein;Uncharacterized protein	Os03g0853800 LOC_Os03g63680 Os03g63680 OsJ_13412 OSNPB_030853800;Os03g0853800 OSNPB_030853800;OsI_14374;OsI_14376	119.954	5.04045e-10	up	7.90633	1	113700000	123510000	101620000	0	0	0	7.91332	7.93855	7.86714	1	1	1
837	A3BED7;Q655Y4;A2YFY2;A0A0E0GWT9	A3BED7;Q655Y4;A2YFY2;A0A0E0GWT9	ALA-interacting subunit;ALA-interacting subunit;ALA-interacting subunit;ALA-interacting subunit	Os06g0665000 Os06g0665000 OSNPB_060665000 P0473H04.13;OsI_24025;OsJ_22277	2.10246	0.373901	up	2.07208	1	0	0	26562000	0	0	0	1	1	4.21624	1	1	1
840	Q10AC8;A0A0E0GWX8;B9F7Z7;B8ANR9;Q84M68;C6YXL0	Q10AC8;A0A0E0GWX8;B9F7Z7;B8ANR9;Q84M68;C6YXL0	Plastid-specific 30S ribosomal protein 1, chloroplast, putative, expressed;Uncharacterized protein;Uncharacterized protein;Uncharacterized protein;Os03g0856500 protein;Protein kinase	LOC_Os03g63950;LOC_Os03g63950 Os03g0856500 OSJNBa0059G06.24 OSJNBb0062G19.14 OSNPB_030856500;OsI_14401;OsJ_13433	8.09934	9.1272e-08	up	4.0178	1	8274500	10323000	14467000	0	0	0	3.97164	3.99878	4.08299	1	1	1
841	Q25AL2;A2XPI4;Q0JFI2;A0A0E0GWY9	Q25AL2;A2XPI4;Q0JFI2;A0A0E0GWY9	H0102C09.4 protein;Uncharacterized protein;Cytochrome P450 93G1;Uncharacterized protein	CYP93G1 Os04g0101400 LOC_Os04g01140 B1160F02.15 OsJ_13492 OSJNBa0068L06.2;H0102C09.4;OsI_14498	4.19405	0.116198	up	3.06834	1	18701000	13383000	0	0	0	0	4.14688	4.05815	1	1	1	1
842	Q7XTB4;Q01N45;A2XPI9;A0A0E0GWZ2	Q7XTB4;Q01N45;A2XPI9;A0A0E0GWZ2	OSJNBa0068L06.9 protein;OSIGBa0123D13.4 protein;Uncharacterized protein;Uncharacterized protein	Os04g0102600 OsJ_13497 OSJNBa0068L06.9 OSNPB_040102600;OsI_14504;OSIGBa0123D13.4	95.2021	9.50262e-09	up	7.57292	1	66954000	51777000	55923000	0	0	0	7.65402	7.51735	7.5474	1	1	1
843	A0A0E0GWZ6;Q0JFH7;Q01N44;A0A0E0GWZ3;A0A0E0GWZ4	A0A0E0GWZ6;Q0JFH7;Q01N44;A0A0E0GWZ3;A0A0E0GWZ4	Uncharacterized protein;Os04g0102700 protein;OSIGBa0123D13.5 protein;Uncharacterized protein;Uncharacterized protein	Os04g0102700 Os04g0102700 OSNPB_040102700;OSIGBa0123D13.5	4.6724	0.373901	up	3.22416	1	70324000	0	0	0	0	0	7.67249	1	1	1	1	1
845	A2XPJ3;Q7XXJ6;Q01N34;A0A0E0GX01;Q0JFH4	A2XPJ3;Q7XXJ6;Q01N34;A0A0E0GX01;Q0JFH4	Uncharacterized protein;OSJNBa0094O15.3 protein;OSIGBa0148I18.3 protein;Uncharacterized protein;Os04g0103300 protein	Os04g0103300 Os04g0103300 OSNPB_040103300;OsI_14508;OSIGBa0148I18.3;OsJ_13501 OSJNBa0094O15.3	151.335	1.16504e-11	up	8.2416	1	215350000	233150000	223100000	0	0	0	8.22668	8.25629	8.24185	1	1	1
847	Q7X7N2;B8AU84;A0A0E0GX18	Q7X7N2;B8AU84;A0A0E0GX18	Arginase 1, mitochondrial;Arginase 1, mitochondrial;Uncharacterized protein	ARG1 Os04g0106300 LOC_Os04g01590 OsJ_13517 OSJNBb0004G23.10 OSJNBb0085F13.5;B0616E02-H0507E05.7 OsI_14570	91.7214	4.08644e-08	up	7.51919	1	55531000	57956000	40995000	0	0	0	7.57388	7.58285	7.40084	1	1	1
849	Q7XTJ6;Q01MR9;B8AUJ5;A0A0E0GX78	Q7XTJ6;Q01MR9;B8AUJ5;A0A0E0GX78	OSJNBa0020P07.8 protein;H0716A07.4 protein;Uncharacterized protein;Uncharacterized protein	H0716A07.4;Os04g0118900 OsJ_13581 OSJNBa0020P07.8 OSNPB_040118900;OsI_14641	3.95833	0.116128	up	2.98489	1	0	9991200	8690300	0	0	0	1	3.99302	3.96165	1	1	1
850	Q7XPB2;A0A0E0GXZ0;Q01MZ9;B8BP98	Q7XPB2;A0A0E0GXZ0;Q01MZ9;B8BP98	OSJNBb0026E15.9 protein;Uncharacterized protein;OSIGBa0132I10.2 protein;Uncharacterized protein	Os04g0196200 Os04g0196200 OsJ_13908 OSJNBb0026E15.9 OSNPB_040196200;OsI_38079;OSIGBa0132I10.2	1.94176	0.373901	up	1.95736	1	0	5643700	0	0	0	0	1	3.87209	1	1	1	1
851	Q7XLR1;A2XPH9;A0A0E0GY26;A0A0P0W7K8;A2XPH8	Q7XLR1;A2XPH9;A0A0E0GY26;A0A0P0W7K8	Probable aquaporin PIP2-6;Uncharacterized protein;Uncharacterized protein;Os04g0233400 protein (Fragment)	Os04g0233400 OSNPB_040233400;OsI_14490;OsI_14491;PIP2-6 Os04g0233400 LOC_Os04g16450 OSJNBb0093G06.10	1.56429	2.53822e-05	up	8.75461	8.1091	668420000	706260000	760270000	89917000	109240000	98404000	8.72397	8.75333	8.78653	8.06765	8.14773	8.11193
852	Q84JG8;Q7XRT0;Q01M83;B9F813;A0A0E0GY30	Q84JG8;Q7XRT0;Q01M83;B9F813;A0A0E0GY30	Chloroplast sedoheptulose-1,7-bisphosphatase;OSJNBa0042F21.13 protein;H0622G10.1 protein;Os04g0234600 protein;Uncharacterized protein	H0622G10.1;Os04g0234600 OsJ_13468 OSNPB_040234600;Os04g0234600 OSJNBa0042F21.13;OsI_14458	152.453	3.53715e-09	up	8.25222	1	258110000	244020000	192250000	0	0	0	8.29402	8.28154	8.18111	1	1	1
853	A0A0E0GY35;Q7XW88;Q01HL6	A0A0E0GY35;Q7XW88;Q01HL6	Uncharacterized protein;OSJNBb0043H09.9 protein;H0211F06-OSIGBa0153M17.2 protein	H0211F06-OSIGBa0153M17.2;Os04g0244400 Os04g0244400 OsJ_14026 OSJNBb0043H09.9 OSNPB_040244400	1.48187	0.373901	up	1.56742	1	0	610580	0	0	0	0	1	2.70225	1	1	1	1
855	A0A0P0W7V7;B9FE34;Q7XNX6;Q01KW8;H6TFZ4;B8AR85;A0A0E0GY50;A3ARN7;A0A0E0GY51;A0A0E0GY48;A0A0E0GY49	A0A0P0W7V7;B9FE34;Q7XNX6;Q01KW8;H6TFZ4;B8AR85;A0A0E0GY50;A3ARN7;A0A0E0GY51;A0A0E0GY48;A0A0E0GY49	Sucrose synthase;Sucrose synthase;Sucrose synthase 7;Sucrose synthase;Sucrose synthase 5;Sucrose synthase;Sucrose synthase;Sucrose synthase;Sucrose synthase;Sucrose synthase;Sucrose synthase	H0211A12.6;Os04g0249500 OSNPB_040249500;OsI_15088;OsJ_14033;OsJ_14034;SUS5 Os04g0309600 LOC_Os04g24430 OSJNBa0033H08.16;SUS7 Os04g0249500 LOC_Os04g17650 OSJNBb0026I12.4	100.897	6.82971e-09	up	7.65674	1	82728000	63829000	62424000	0	0	0	7.73389	7.62273	7.61358	1	1	1
856	A0A0P0W8S4;B9FEC7;A0A0E0GYU4;A0A0E0GYU2;Q9ST27;Q01ME5;A0A0E0GYU5;A0A0E0GYU3;B8AS72	A0A0P0W8S4;B9FEC7;A0A0E0GYU4;A0A0E0GYU2;Q9ST27;Q01ME5;A0A0E0GYU5;A0A0E0GYU3;B8AS72	Os04g0304200 protein (Fragment);Uncharacterized protein;Uncharacterized protein;Uncharacterized protein;Phototropin-2;OSIGBa0092O07.5 protein;Uncharacterized protein;Uncharacterized protein;Uncharacterized protein	Os04g0304200 OSNPB_040304200;OsI_15306;OSIGBa0092O07.5;OsJ_14207;PHOT2 Os04g0304200 LOC_Os04g23890 OSJNBa0079M09.13	18.6048	0.015551	up	5.2176	1	19439000	25756000	34357000	0	0	0	4.1547	4.19484	7.30327	1	1	1
859	A0A0P0W993;A2XRT6;B9FEE2;Q7XW09;Q01M10;A0A0E0GZ11;Q0JE83	A0A0P0W993;A2XRT6;B9FEE2;Q7XW09;Q01M10;A0A0E0GZ11;Q0JE83	Os04g0311400 protein (Fragment);Uncharacterized protein;Uncharacterized protein;OSJNBb0054B09.3 protein;OSIGBa0130O15.4 protein;Uncharacterized protein;Os04g0311400 protein (Fragment)	Os04g0311400 Os04g0311400 OSNPB_040311400;Os04g0311400 OSNPB_040311400;OsI_15336;OSIGBa0148D14.11 OSIGBa0130O15.4;OsJ_14236;OSJNBb0054B09.3	2.03109	0.373901	up	2.02225	1	0	0	13373000	0	0	0	1	1	4.06676	1	1	1
860	Q7XRN9;B8AUM3;B9FDG3;A0A0E0GZ44;B8AUM2;B9FDG2;Q7XXJ7;A0A0P0W6E6;C7J1J1	Q7XRN9;B8AUM3;B9FDG3;A0A0E0GZ44;B8AUM2;B9FDG2;Q7XXJ7;A0A0P0W6E6	OSJNBb0080H08.21 protein;Uncharacterized protein;Uncharacterized protein;Uncharacterized protein;Uncharacterized protein;Uncharacterized protein;OSJNBb0080H08.20 protein;Os04g0131850 protein	Os04g0131850;Os04g0131850 OSNPB_040131850;Os04g0131900 Os04g0131900 OSJNBb0080H08.21 OSNPB_040131900;OsI_14700;OsI_14701;OsJ_13634;OsJ_13635;OSJNBb0080H08.20	8.71621	3.17911e-10	up	4.1237	1	16038000	18936000	18373000	0	0	0	4.10686	4.13276	4.13148	1	1	1
861	Q60E78;A0A0E0GZ62;B9FHG6;Q6I683	Q60E78;A0A0E0GZ62;B9FHG6;Q6I683	Putative UDP-glucuronic acid decarboxylase;Uncharacterized protein;Uncharacterized protein;Os05g0363200 protein	OsJ_18245;P0692D12.17;UXS-5 Os05g0363200 OSNPB_050363200	59.6701	8.04075e-05	up	6.89894	1	33727000	32904000	29617000	0	0	0	7.29351	7.22137	6.18193	1	1	1
862	A6N0S1;P49199;B8AHZ6;A0A0E0J1N0;Q0JDZ7;A2XS59;A0A0E0GZE3	A6N0S1;P49199;B8AHZ6;A0A0E0J1N0;Q0JDZ7;A2XS59;A0A0E0GZE3	40S ribosomal protein S8 (Fragment);40S ribosomal protein S8;40S ribosomal protein S8;40S ribosomal protein S8;40S ribosomal protein S8;40S ribosomal protein S8;40S ribosomal protein S8	Os04g0349500 Os04g0349500 OsJ_14370 OSJNBa0038P21.4 OSNPB_040349500;OsI_07259;OsI_15456;RPS8 Os02g0489400 LOC_Os02g28810 OsJ_06781 OSJNBa0048K16.2 P0483C08.42	26.1433	0.116126	up	5.70837	1	139110000	164820000	0	0	0	0	8.0275	8.09761	1	1	1	1
864	B9FEW6;Q0JDN5;Q01LD8;B8AT82;A0A0P0W9W2;A0A0E0GZY0;A0A0P0WA25;A0A0P0W9J4	B9FEW6;Q0JDN5;Q01LD8;B8AT82;A0A0P0W9W2;A0A0E0GZY0;A0A0P0WA25	Uncharacterized protein;Os04g0390000 protein (Fragment);OSIGBa0096P03.7 protein;Uncharacterized protein;Os04g0390000 protein;Uncharacterized protein;Os04g0390000 protein	Os04g0390000;Os04g0390000 OSNPB_040390000;OsI_15669;OSIGBa0096P03.7;OsJ_14584	34.3277	0.0780781	up	8.26656	3.16525	246090000	190400000	293430000	0	20355000	0	8.27611	8.16027	8.36329	1	7.49576	1
865	A0A0N7KIZ1;A0A0P0WA50;Q7XRV2;Q01LD5;G9MB28;A2XSU1;A0A0E0GZY2;A0A0E0GZY4;A0A0E0GZY3	A0A0N7KIZ1;A0A0P0WA50;Q7XRV2;Q01LD5;G9MB28;A2XSU1;A0A0E0GZY2;A0A0E0GZY4;A0A0E0GZY3	Os04g0390500 protein;Os04g0390500 protein (Fragment);Probable metal-nicotianamine transporter YSL6;OSIGBa0132D06.2 protein;Transporter for Mn-nicotianamine complex;Uncharacterized protein;Uncharacterized protein;Uncharacterized protein;Uncharacterized prot	Os04g0390500 OSNPB_040390500;OsI_15674;OSIGBa0132D06.2;OsYSL6;YSL6 Os04g0390500 LOC_Os04g32050 OsJ_014022 OSJNBa0055C08.1	1.98563	0.373901	up	1.98959	1	0	8914400	0	0	0	0	1	3.96878	1	1	1	1
870	A3ATF3;Q7XLG4;Q01L36;A2XSZ0;A0A0E0H040	A3ATF3;Q7XLG4;Q01L36;A2XSZ0;A0A0E0H040	Cytochrome b-c1 complex subunit Rieske, mitochondrial;Cytochrome b-c1 complex subunit Rieske, mitochondrial;Cytochrome b-c1 complex subunit Rieske, mitochondrial;Cytochrome b-c1 complex subunit Rieske, mitochondrial;Cytochrome b-c1 complex subunit Rieske,	H0209H04.2;Os04g0398500 OSJNBa0039C07.12 OSNPB_040398500;OsI_15723;OsJ_14641	1.20845	0.0974581	up	8.04768	7.77451	234090000	133140000	107560000	30660000	55182000	44206000	8.25942	7.98725	7.89635	7.64683	7.85539	7.82132
871	Q7XVZ0;Q6K5R5;Q01L64;Q01L31;B9FEZ1;A2XS31;A2X4T7;A0A0E0I0M3;A0A0E0H053;Q7XL87;A0A0P0WA00;B8ATF7	Q7XVZ0;Q6K5R5;Q01L64;Q01L31;B9FEZ1;A2XS31;A2X4T7;A0A0E0I0M3;A0A0E0H053;Q7XL87;A0A0P0WA00	40S ribosomal protein S27;40S ribosomal protein S27;40S ribosomal protein S27;40S ribosomal protein S27;40S ribosomal protein S27;40S ribosomal protein S27;40S ribosomal protein S27;40S ribosomal protein S27;40S ribosomal protein S27;OSJNBb0014D23.2 protei	H0209H04.7;Os02g0478700 Os02g0478700 OsJ_06730 OSNPB_020478700 P0527E02.36;Os04g0346100 Os04g0346100 OsJ_14350 OSJNBa0020I02.1 OSNPB_040346100;Os04g0399000 OSNPB_040399000;OsI_07209;OsI_15427;OsI_15727;OSIGBa0111I14.2;OsJ_14646;OSJNBb0014D23.2	168.444	1.75862e-07	up	8.39612	1	203580000	387400000	374540000	0	0	0	8.20254	8.49553	8.4903	1	1	1
872	Q01LG9;A2XT06;A0A0E0H077	Q01LG9;A2XT06;A0A0E0H077	OSIGBa0155K12.5 protein;Uncharacterized protein;Uncharacterized protein	OsI_15744;OSIGBa0155K12.5	1.22832	0.373901	up	1.29668	1	2189200	0	0	0	0	0	1.89005	1	1	1	1	1
873	A0A0P0WA59;Q6VVA6;Q01LG8;A2XT08;A0A0E0H079	A0A0P0WA59;Q6VVA6;Q01LG8;A2XT08;A0A0E0H079	Potassium transporter (Fragment);Potassium transporter 1;Potassium transporter;Potassium transporter;Potassium transporter	HAK1 Os04g0401700 LOC_Os04g32920 OsJ_14662 OSJNBb0012E08.7;Os04g0401700 OSNPB_040401700;OsI_15745;OSIGBa0155K12.6	21.2745	0.116132	up	5.41106	1	0	57230000	67302000	0	0	0	1	7.57578	7.65739	1	1	1
877	B8ATN5;Q7XVG5;Q01JB7;A0A0E0H0G1;Q0JDD8;B9FF25;B8ATN3;A0A0E0H0G0	B8ATN5;Q7XVG5;Q01JB7;A0A0E0H0G1;Q0JDD8;B9FF25;B8ATN3;A0A0E0H0G0	Uncharacterized protein;OSJNBa0073L04.5 protein;H0717B12.5 protein;Uncharacterized protein;Os04g0411800 protein (Fragment);Uncharacterized protein;Uncharacterized protein;Uncharacterized protein	H0717B12.5;Os04g0411800;Os04g0411800 OSJNBa0073L04.5 OSNPB_040411800;OsI_15805;OsI_15807;OsJ_14722	7.87783	1.00399e-07	up	3.9778	1	10737000	10752000	6641000	0	0	0	4.01632	4.00681	3.91027	1	1	1
880	Q0JDA2;A2XTC1;A0A0E0H0M2	Q0JDA2;A2XTC1;A0A0E0H0M2	Succinate dehydrogenase subunit 5, mitochondrial;Uncharacterized protein;Uncharacterized protein	OsI_15856;SDH5 Os04g0418000 LOC_Os04g34100 OsJ_14772 OSJNBa0033G16.15 OSJNBb0108J11.2	114.632	2.83798e-08	up	7.84086	1	91397000	125710000	82572000	0	0	0	7.80339	7.95236	7.76684	1	1	1
883	B8AS56;A0A0E0H0S3	B8AS56;A0A0E0H0S3	Uncharacterized protein;Uncharacterized protein	OsI_18064	5.45208	0.373901	up	3.44681	1	0	274170000	0	0	0	0	1	8.34042	1	1	1	1
884	A2XTL5;A0A0E0H107;A3AU06;Q0JD42;Q01JF2	A2XTL5;A0A0E0H107;A3AU06;Q0JD42;Q01JF2	Uncharacterized protein;Uncharacterized protein;Uncharacterized protein;Protein disulfide isomerase-like 5-2;H0315E07.1 protein	H0315E07.1;OsI_15947;OsJ_14861;PDIL5-2 PDIL7-1 Os04g0432500 LOC_Os04g35290 OSJNBa0084A10.17	96.606	1.16347e-06	up	7.59404	1	62256000	38002000	90398000	0	0	0	7.62957	7.33841	7.81414	1	1	1
886	Q7X914;Q7FA04;B8AUE7;A0A0E0H188;Q0JCZ5;A0A0E0H187;A0A0N7KJ40	Q7X914;Q7FA04;B8AUE7;A0A0E0H188;Q0JCZ5;A0A0E0H187	p0076O17.9 protein;OSJNBa0064D20.9 protein;Uncharacterized protein;Uncharacterized protein;Os04g0441900 protein (Fragment);Uncharacterized protein	Os04g0441900 Os04g0441900 OSNPB_040441900;Os04g0441900 OSNPB_040441900;OsI_16024;OSJNBa0064D20.9 Os04g0441900 OsJ_14919 OSNPB_040441900;P0076O17.9	108.943	3.84605e-09	up	7.76743	1	88461000	75619000	92645000	0	0	0	7.77654	7.70442	7.82132	1	1	1
887	A0A0E0H1C5;B8BJN0;A0A0P0WAW0;B9FFD5	A0A0E0H1C5;B8BJN0;A0A0P0WAW0;B9FFD5	Uncharacterized protein;Uncharacterized protein;Os04g0443900 protein;Uncharacterized protein	Os04g0443900 OSNPB_040443900;OsI_35492;OsJ_14927	2.05499	0.373901	up	2.03913	1	0	17522000	0	0	0	0	1	4.11739	1	1	1	1
888	Q7X5X9;A0A0E0H1D3;B8AL50;A0A0E0H2L4;Q75G86;A2XTW4;Q8W3N2;A0A0P0VZM1;A0A0P0WAP9	Q7X5X9;A0A0E0H1D3;B8AL50;A0A0E0H2L4;Q75G86;A2XTW4	OSJNBa0027P08.4 protein;Uncharacterized protein;Uncharacterized protein;Uncharacterized protein;Os03g0576400 protein;Uncharacterized protein	LOC_Os03g37950 Os03g0576400 OsJ_11518 OSJNBa0008D12.8;Os03g0576400 OSNPB_030576400;Os04g0444600 OsJ_14933 OSJNBa0027P08.4 OSJNBa0058G03.7 OSNPB_040444600;Os04g0444600 OSNPB_040444600;OsI_12343;OsI_16043;OsRPN6	46.9965	0.00130534	up	6.55448	1	39145000	30170000	30040000	0	0	0	7.38212	5.18057	7.10075	1	1	1
889	B9FFD8;Q7XUW2;Q6L8G3;Q0JCX7;B8AUC6;A0A0E0H1D6	B9FFD8;Q7XUW2;Q6L8G3;Q0JCX7;B8AUC6;A0A0E0H1D6	Uncharacterized protein;OSJNBa0027P08.6 protein;Ferric reductase;Os04g0444800 protein;Uncharacterized protein;Uncharacterized protein	0sFRO1;Os04g0444800 Os04g0444800 OSNPB_040444800;OsI_16048;OsJ_14936;OSJNBa0027P08.6	2.0173	0.373901	up	2.01243	1	11937000	0	0	0	0	0	4.03728	1	1	1	1	1
890	Q7XUX5;Q01J28;A0A0E0H1F3;B8AUD1;A0A0P0WAZ7	Q7XUX5;Q01J28;A0A0E0H1F3;B8AUD1;A0A0P0WAZ7	Peptidylprolyl isomerase;Peptidylprolyl isomerase;Peptidylprolyl isomerase;Peptidylprolyl isomerase;Os04g0446500 protein (Fragment)	Os04g0446500 Os04g0446500 OsJ_14952 OSJNBa0027P08.21 OSNPB_040446500;Os04g0446500 OSNPB_040446500;OsI_16064;OSIGBa0140O07.15	9.53125	0.160795	up	4.25267	1	52408000	0	25061000	0	0	0	7.55531	1	4.20268	1	1	1
891	A3AUA9;A2XU09;Q01J71;A0A0E0H1H8;Q0JCU7;A0A0E0H1H7	A3AUA9;A2XU09;Q01J71;A0A0E0H1H8;Q0JCU7;A0A0E0H1H7	Zeaxanthin epoxidase, chloroplastic;Zeaxanthin epoxidase, chloroplastic;Zeaxanthin epoxidase, chloroplastic;Zeaxanthin epoxidase, chloroplastic;Zeaxanthin epoxidase, chloroplastic;Zeaxanthin epoxidase, chloroplastic	OsI_16086;OSIGBa0152K17.16 H0818E04.7;OsJ_14973;ZEP ABA1 Os04g0448900 LOC_Os04g37619 OSJNBa0064H22.16	1.1263	0.0319005	up	7.99934	7.82774	124840000	155790000	127990000	46502000	41691000	54823000	7.95717	8.06196	7.97888	7.81414	7.76205	7.90704
892	Q7XRE7;Q01JQ5;A2XU59;A2YE33;A0A0E0H1L9;Q6ZGP5;A2X9Q0;A0A0E0GCU0	Q7XRE7;Q01JQ5;A2XU59;A2YE33;A0A0E0H1L9;Q6ZGP5;A2X9Q0;A0A0E0GCU0	OSJNBa0006M15.20 protein;H0523F07.8 protein;Uncharacterized protein;Uncharacterized protein;Uncharacterized protein;Os02g0753300 protein;Uncharacterized protein;Uncharacterized protein	H0523F07.8;Os02g0753300 Os02g0753300 OJ1288_G09.19 OSNPB_020753300;OsI_08972;OsI_16133;OsI_23378;OSJNBa0036B21.4 Os04g0456700 OsJ_15027 OSJNBa0006M15.20 OSNPB_040456700	4.6525	0.373901	up	3.21801	1	0	68579000	0	0	0	0	1	7.65402	1	1	1	1
894	Q6Z4U4;B8BB68;Q7XV05;Q01JP8;A2XU70;A0A0E0H1M8;A0A0P0WBA5;Q5KS47;A0A0N7KPC9;A0A0E0I7R2;Q5KS46;B9FZB8	Q6Z4U4;B8BB68;Q7XV05;Q01JP8;A2XU70;A0A0E0H1M8;A0A0P0WBA5;Q5KS47;A0A0N7KPC9;A0A0E0I7R2;Q5KS46;B9FZB8	LRR receptor kinase BAK1;LRR receptor kinase BAK1;LRR receptor kinase SERK2;H0523F07.15 protein;Uncharacterized protein;Uncharacterized protein;Os04g0457800 protein (Fragment);Os08g0176200 protein (Fragment);Os08g0176200 protein (Fragment);Uncharacterized	BAK1 BISERK1 Os08g0174700 LOC_Os08g07760 OsJ_26221 OSJNBa0054L03.30;BAK1 BISERK1 SERK1 OsI_28003;H0523F07.15;ORK1;ORK1 Os08g0176200;Os04g0457800 OSNPB_040457800;Os08g0176200 OSNPB_080176200;OsI_16145;OsJ_26230;SERK2 SERK1 Os04g0457800 LOC_Os04g38480 OsJ_15037 OSJNBa0036B21.13	1.98818	0.373901	up	1.99145	1	8359500	0	0	0	0	0	3.97435	1	1	1	1	1
896	Q7X8A1;Q01IJ6;A2XU83;A0A0E0H1P0;O22534;O22387;B7EE22	Q7X8A1;Q01IJ6;A2XU83;A0A0E0H1P0;O22534;O22387	Glyceraldehyde-3-phosphate dehydrogenase;Glyceraldehyde-3-phosphate dehydrogenase;Glyceraldehyde-3-phosphate dehydrogenase;Glyceraldehyde-3-phosphate dehydrogenase;Glyceralehyde-3-phosphate dehydrogenase subunit (Fragment);Glyceraldehyde-3-phosphate dehydr	GAPDH;H0219H12.1 OSIGBa0097P08.6;Os04g0459500 OsJ_15048 OSJNBa0036B21.24 OSJNBa0072F16.1 OSNPB_040459500;Os04g0459500 OSNPB_040459500;OsI_16160	5.84996	0.3597	up	8.47487	5.92645	378970000	551930000	248990000	179590000	0	213260000	8.46397	8.65864	8.30201	8.34994	1	8.4294
900	Q7XK23;Q33E21;A2XUP0;Q01JY8;A0A0E0H259;Q0JCD0	Q7XK23;Q33E21;A2XUP0;Q01JY8;A0A0E0H259;Q0JCD0	OSJNBa0044K18.22 protein;NAD-dependent isocitrate dehydrogenase c;1;Uncharacterized protein;OSIGBa0116M22.11 protein;Uncharacterized protein;Os04g0479200 protein (Fragment)	1 Os04g0479200 OsJ_15196 OSNPB_040479200;Os04g0479200;OsI_16326;OsIDHc;OSIGBa0116M22.11;OSJNBa0044K18.22	126.003	1.00845e-08	up	7.97731	1	124430000	118670000	156620000	0	0	0	7.95236	7.91548	8.06409	1	1	1
901	Q7XQF8;Q01IG3;A0A0E0H2A5;B8AVJ3	Q7XQF8;Q01IG3;A0A0E0H2A5;B8AVJ3	OSJNBa0081L15.5 protein;H0805A05.3 protein;Uncharacterized protein;Uncharacterized protein	H0805A05.3;Os04g0483500 Os04g0483500 OsJ_15231 OSJNBa0081L15.5 OSNPB_040483500;OsI_16363	172.874	1.37202e-09	up	8.43358	1	389470000	318190000	316240000	0	0	0	8.4903	8.41491	8.39552	1	1	1
903	Q7FAH2;A0A0E0H2C1;A3AV14;A2XUU7;A6MZB2;A0A0P0WBW9;A6N023;A6N0K0;A3BEE9;Q655W2;A2YFZ4;A0A0E0GWS7;A0A0P0XBB4	Q7FAH2;A0A0E0H2C1;A3AV14;A2XUU7;A6MZB2;A0A0P0WBW9;A6N023	Glyceraldehyde-3-phosphate dehydrogenase 2, cytosolic;Glyceraldehyde-3-phosphate dehydrogenase;Glyceraldehyde-3-phosphate dehydrogenase;Glyceraldehyde-3-phosphate dehydrogenase;Glyceraldehyde-3-phosphate dehydrogenase (Fragment);Os04g0486600 protein (Fragm	GAPC2 GAPDH Os04g0486600 LOC_Os04g40950 H0302E05.3 OJ000223_09.15;Os04g0486600 OSNPB_040486600;Os06g0666600 OSNPB_060666600 P0637D03.25;Os08g0126300 OSNPB_080126300;OsI_16384;OsI_24036;OsJ_15252;OsJ_22288	1.04762	0.494228	up	9.25472	9.18761	2391400000	2357200000	1937000000	1634700000	1426300000	880420000	9.29458	9.29458	9.17501	9.28539	9.24826	9.02917
905	A0A0E0H2G5;Q7X8U6;A3AV43;A2XUY0	A0A0E0H2G5;Q7X8U6;A3AV43;A2XUY0	Uncharacterized protein;OSJNBa0076N16.8 protein;Uncharacterized protein;Uncharacterized protein	Os04g0490400 Os04g0490400 OSJNBa0076N16.8 OSJNBa0084K20.10 OSNPB_040490400;OsI_16419;OsJ_15282	9.01686	0.155567	up	4.17263	1	0	35719000	27995000	0	0	0	1	7.29036	4.22751	1	1	1
907	Q10HT1;Q75G91;A2XIT7;A0A0E0H2K9;A6N030	Q10HT1;Q75G91;A2XIT7;A0A0E0H2K9	40S ribosomal protein S3, putative, expressed;40S ribosomal protein S3, putative, expressed;Uncharacterized protein;Uncharacterized protein	LOC_Os03g38000;Os03g0577000 LOC_Os03g38000 Os03g0577000 OsJ_11524 OSJNBa0008D12.4 OSNPB_030577000;OsI_12347	161.838	1.86238e-08	up	8.33841	1	325190000	219100000	317560000	0	0	0	8.38695	8.22908	8.39919	1	1	1
908	Q8VX00;Q10HT7;Q9LWS2;Q8S9G2;Q7XJB4;A2Y8K1;A2XIT5;A0A0E0HK23;A0A0E0H2L1	Q8VX00;Q10HT7;Q9LWS2;Q8S9G2;Q7XJB4;A2Y8K1;A2XIT5;A0A0E0HK23;A0A0E0H2L1	60S ribosomal protein L13;60S ribosomal protein L13;60S ribosomal protein L13;60S ribosomal protein L13;60S ribosomal protein L13;60S ribosomal protein L13;60S ribosomal protein L13;60S ribosomal protein L13;60S ribosomal protein L13	bbc1l;cip1;LOC_Os03g37970;Os03g0576700 LOC_Os03g37970 Os03g0576700 OsJ_11521 OSJNBa0008D12.6 OSNPB_030576700;Os06g0115500 Os06g0115500 OsJ_19902 OSJNBa0019F11.16 OSNPB_060115500 P0541H01.38;OsI_12345;OsI_21382	1.81128	6.55517e-05	up	8.56208	7.70507	393510000	506510000	446350000	31245000	33889000	38903000	8.5034	8.61984	8.56301	7.65739	7.68128	7.77654
909	Q0JC31;A2XV22;A0A0E0H2M8;Q7XU55;Q01IQ7	Q0JC31;A2XV22;A0A0E0H2M8;Q7XU55;Q01IQ7	Os04g0495300 protein;Uncharacterized protein;Uncharacterized protein;OSJNBb0091E11.22 protein;OSIGBa0159F11.7 protein	Os04g0495300 Os04g0495300 OSNPB_040495300;OsI_16460;OSIGBa0159F11.7;OSJNBb0091E11.22	7.94487	8.59953e-08	up	3.99002	1	7187000	13266000	8956900	0	0	0	3.94589	4.05394	3.97024	1	1	1
910	Q7XUK6;Q01IC6;A2XV50;B9EUT9;A0A0E0H2P6	Q7XUK6;Q01IC6;A2XV50;B9EUT9;A0A0E0H2P6	6,7-dimethyl-8-ribityllumazine synthase;6,7-dimethyl-8-ribityllumazine synthase;6,7-dimethyl-8-ribityllumazine synthase;6,7-dimethyl-8-ribityllumazine synthase;Uncharacterized protein	LS Os04g0497400 OSJNBa0067K08.17 OSNPB_040497400;OsI_16488;OSIGBa0092E01.9 H0306B06.13;OsJ_04178	85.0498	5.96864e-09	up	7.41024	1	45408000	39020000	40946000	0	0	0	7.47749	7.35433	7.39889	1	1	1
911	Q7X6M7;Q01IV5;A0A0E0H2X9;B8ARR1;B7EC55	Q7X6M7;Q01IV5;A0A0E0H2X9;B8ARR1;B7EC55	OSJNBa0043L24.5 protein;OSIGBa0157A06.4 protein;Uncharacterized protein;Uncharacterized protein;cDNA clone:J013060A10, full insert sequence	Os04g0507100 OsJ_15394 OSJNBa0043L24.5 OSJNBb0002J11.14 OSNPB_040507100;OsI_16566;OSIGBa0157A06.4	4.42568	0.373901	up	3.1459	1	42607000	0	0	0	0	0	7.4377	1	1	1	1	1
912	Q7XMA0;Q01I76;B8ARN5;Q0JBV4;A0A0E0H2Z6;A0A0E0H2Z5	Q7XMA0;Q01I76;B8ARN5;Q0JBV4;A0A0E0H2Z6;A0A0E0H2Z5	Isocitrate dehydrogenase [NADP];Isocitrate dehydrogenase [NADP];Isocitrate dehydrogenase [NADP];Isocitrate dehydrogenase [NADP];Uncharacterized protein;Uncharacterized protein	Os04g0508200 Os04g0508200 OSNPB_040508200;OsI_16579;OSIGBa0101P20.6;OsJ_15408 OSJNBa0043L24.16	38.6093	0.00669909	up	6.27088	1	28046000	36224000	33509000	0	0	0	4.22784	7.30131	7.28349	1	1	1
914	A0A0P0WCF8;Q7XQ12;Q01HF3;A2XVF3;A0A0E0H317	A0A0P0WCF8;Q7XQ12;Q01HF3;A2XVF3;A0A0E0H317	Ammonium transporter (Fragment);Ammonium transporter 1 member 1;Ammonium transporter;Ammonium transporter;Ammonium transporter	AMT1-1 AMT1 Os04g0509600 LOC_Os04g43070 OsJ_15423 OSJNBb0065L13.7;Os04g0509600 OSNPB_040509600;OsI_16598;OSIGBa0157K09-H0214G12.4	5.51674	0.123413	up	3.46382	1	23326000	0	28898000	0	0	0	4.19339	1	5.19806	1	1	1
916	Q7XUA6;Q01IB8;A2XVL4;A0A0E0H393	Q7XUA6;Q01IB8;A2XVL4;A0A0E0H393	Probable aquaporin PIP2-3;OSIGBa0131L05.7 protein;Uncharacterized protein;Uncharacterized protein	OsI_16674;OSIGBa0131L05.7;PIP2-3 Os04g0521100 LOC_Os04g44060 OSJNBa0019D11.16	4.41136	0.116118	up	3.14122	1	0	27037000	26919000	0	0	0	1	4.20518	4.21849	1	1	1
917	A3AVM8;Q7XUA8;Q01IB1;A2XVL9;A0A0E0H3A0	A3AVM8;Q7XUA8;Q01IB1;A2XVL9;A0A0E0H3A0	Uncharacterized protein;IAA-amino acid hydrolase ILR1-like 5;OSIGBa0131L05.10 protein;Uncharacterized protein;Uncharacterized protein	ILL5 Os04g0521800 LOC_Os04g44110 OSJNBa0019D11.19;OsI_16679;OSIGBa0131L05.10;OsJ_15493	2.00139	0.373901	up	2.001	1	0	0	10071000	0	0	0	1	1	4.00301	1	1	1
918	Q7XKF5;Q01HR2;A2XVN7;A0A0P0WCK1;A0A0E0H3C1;B9FG81;Q75LS4;Q10KA7;B9F8T7;A0A0P0VZ23;A0A0E0FGI9;A0A0E0FGI8	Q7XKF5;Q01HR2;A2XVN7;A0A0P0WCK1;A0A0E0H3C1;B9FG81	OSJNBb0065J09.14 protein;OSIGBa0153E02-OSIGBa0093I20.13 protein;Uncharacterized protein;Os04g0524400 protein;Uncharacterized protein;Uncharacterized protein	LOC_Os03g27340;Os03g0390900 OSJNBa0017N12.2;Os03g0390900 OSNPB_030390900;Os04g0524400 OSJNBb0065J09.14;Os04g0524400 OSNPB_040524400;OsI_16697;OSIGBa0153E02-OSIGBa0093I20.13;OsJ_11119;OsJ_15511	4.35128	0.116117	up	3.12144	1	0	24145000	23115000	0	0	0	1	4.17986	4.18446	1	1	1
919	Q7XI40;B9FUB3;A0A0E0H3D2;A2YNV2	Q7XI40;B9FUB3;A0A0E0H3D2;A2YNV2	UMP-CMP kinase 3;UMP-CMP kinase;UMP-CMP kinase;UMP-CMP kinase	OsI_26926;OsJ_25184;URA6 Os07g0624700 LOC_Os07g43170 P0524E08.133	1.47982	0.373901	up	1.56542	1	0	564780	0	0	0	0	1	2.69627	1	1	1	1
920	A0A0E0H3I7;A0A0E0H3I6;A2XVU7;Q7XMK8;B8AFZ8;A0A0E0GAB8;Q6H7S2;A0A0E0GAB7;Q109G2;B8BHR5;A0A0E0IUY0;Q9M2E0;Q8RXK6;Q94BV4	A0A0E0H3I7;A0A0E0H3I6;A2XVU7;Q7XMK8;B8AFZ8;A0A0E0GAB8;Q6H7S2;A0A0E0GAB7;Q109G2;B8BHR5;A0A0E0IUY0;Q9M2E0;Q8RXK6;Q94BV4	Uncharacterized protein;Uncharacterized protein;Uncharacterized protein;DEAD-box ATP-dependent RNA helicase 6;Uncharacterized protein;Uncharacterized protein;DEAD-box ATP-dependent RNA helicase 8;Uncharacterized protein;DEAD-box ATP-dependent RNA helicase	Os02g0641800 LOC_Os02g42860 OJ1112_G03.6-1 OJ1112_G03.6-2 OsJ_07688;Os04g0533000 LOC_Os04g45040 OsJ_15580 OSJNBb0039L24.10;Os10g0503700 LOC_Os10g35990 OsJ_32082 OSJNBb0073N24.12;OsI_08237;OsI_16765;OsI_34232;RH12 At3g61240 T20K12.140;RH6 At2g45810 F4I18.21;RH8 At4g00660 F6N23.6	3.80263	0.116135	up	2.927	1	5429300	6891800	0	0	0	0	3.87072	3.91027	1	1	1	1
921	Q5QT28;Q7XMK5;A2XVV0;A0A0E0H3J1;A0A0N7KJF0	Q5QT28;Q7XMK5;A2XVV0;A0A0E0H3J1;A0A0N7KJF0	Putative remorin 1 protein (Fragment);OSJNBb0039L24.13 protein;Uncharacterized protein;Uncharacterized protein;Os04g0533300 protein (Fragment)	Os04g0533300 OsJ_15583 OSJNBb0039L24.13 OSNPB_040533300;Os04g0533300 OSNPB_040533300;OsI_16768;remorin1	166.458	1.49621e-11	up	8.37901	1	301550000	309880000	298630000	0	0	0	8.36537	8.39671	8.37496	1	1	1
922	Q7XU74;Q01IH3;A0A0E0H3K4	Q7XU74;Q01IH3;A0A0E0H3K4	Peroxisomal membrane protein 11-4;Peroxisomal membrane protein 11-4;Uncharacterized protein	PEX11-4 Os04g0534600 LOC_Os04g45210 OsJ_014940 OSJNBb0020O11.14;PEX11-4 OsI_016204 OSIGBa0159I10.12	8.92908	9.33233e-12	up	4.15851	1	20478000	20931000	20794000	0	0	0	4.16512	4.15306	4.15736	1	1	1
923	Q0JBE3;B9FGD1;Q7XQQ7;A0A0E0H3M3;A2XVY3	Q0JBE3;B9FGD1;Q7XQQ7;A0A0E0H3M3;A2XVY3	Os04g0538100 protein (Fragment);Elongation factor G, chloroplastic;Elongation factor G, mitochondrial;Elongation factor G, chloroplastic;Elongation factor G, chloroplastic	Os04g0538100 Os04g0538100 OSNPB_040538100;OsI_16800;OsJ_15609;OSJNBa0091D06.15	11.6571	0.185998	up	6.64273	3.09959	33202000	45336000	28877000	0	11901000	0	7.28513	7.45043	5.19264	1	7.29877	1
924	Q7FB12;A2XVZ1;A0A0E0H3N2	Q7FB12;A2XVZ1;A0A0E0H3N2	NAD(P)H-quinone oxidoreductase subunit M, chloroplastic;NAD(P)H-quinone oxidoreductase subunit M, chloroplastic;Uncharacterized protein	ndhM NDH-M Os04g0539000 LOC_Os04g45600 OsJ_014964 OSJNBa0011L07.3 OSJNBa0091D06.25;ndhM NDH-M OsI_016234	1.01388	0.925136	up	8.2286	8.20871	272140000	276280000	140500000	276980000	64787000	115280000	8.31186	8.34644	8.0275	8.52407	7.93514	8.16691
925	Q33E23;A2XW22;A0A0E0H3S7;Q7XN06;A2X7V1;Q6H3Y7;A0A0E0GAG9	Q33E23;A2XW22;A0A0E0H3S7;Q7XN06;A2X7V1;Q6H3Y7;A0A0E0GAG9	Glutamate dehydrogenase 2, mitochondrial;Glutamate dehydrogenase 2, mitochondrial;Glutamate dehydrogenase;Glutamate dehydrogenase;Glutamate dehydrogenase;Glutamate dehydrogenase 3, mitochondrial;Glutamate dehydrogenase	GDH2 LOC_Os04g45970 Os04g0543900 OSNPB_040543900;GDH2 OsI_16842;GDH3 LOC_Os02g43470 Os02g0650900 OsJ_07745 OSJNBb0012J10.18 OSNPB_020650900;OsI_08294;OSJNBb0038F03.5	112.269	5.75479e-09	up	7.81081	1	105500000	85611000	85418000	0	0	0	7.88522	7.76107	7.78614	1	1	1
926	A0A0P0X2E8;Q8H930;B8B749;A0A0E0H400	A0A0P0X2E8;Q8H930;B8B749;A0A0E0H400	Os07g0139400 protein (Fragment);Probable UDP-arabinose 4-epimerase 1;Uncharacterized protein;Uncharacterized protein	Os07g0139400 OSNPB_070139400;OsI_24840;UEL-1 Os07g0139400 LOC_Os07g04690 OJ1417_E01.121 OsJ_23039 P0495H05.61	8.69129	3.0698e-09	up	4.11957	1	16013000	16459000	20355000	0	0	0	4.10567	4.10381	4.14923	1	1	1
927	A3AW83;Q7XT37;Q01IM8;A2XW90;A0A0E0H410;A0A0P0WDG9;A0A0P0WD88	A3AW83;Q7XT37;Q01IM8;A2XW90;A0A0E0H410;A0A0P0WDG9;A0A0P0WD88	Uncharacterized protein;OSJNBa0010H02.13 protein;OSIGBa0143N19.6 protein;Uncharacterized protein;Uncharacterized protein;Os04g0553000 protein (Fragment);Os04g0553000 protein (Fragment)	Os04g0553000 OSJNBa0010H02.13;Os04g0553000 OSNPB_040553000;OsI_16916;OSIGBa0143N19.6;OsJ_15716	86.5082	2.42416e-07	up	7.43477	1	56778000	34940000	44706000	0	0	0	7.58161	7.26747	7.45522	1	1	1
929	A0A0P0WDE0;A0A0E0H468;Q0JB40;B8ASW6;A0A0E0H469;Q7XPS0;Q01HA0	A0A0P0WDE0;A0A0E0H468;Q0JB40;B8ASW6;A0A0E0H469;Q7XPS0;Q01HA0	Os04g0558400 protein (Fragment);Uncharacterized protein;Os04g0558400 protein;Uncharacterized protein;Uncharacterized protein;OSJNBa0065O17.11 protein;B0103C08-B0602B01.3 protein	B0103C08-B0602B01.3;Os04g0558400 Os04g0558400 OsJ_15751 OSNPB_040558400;Os04g0558400 OSNPB_040558400;OsI_16954;OSJNBa0065O17.11	104.381	9.27587e-11	up	7.70571	1	75569000	78956000	71923000	0	0	0	7.69626	7.73196	7.6889	1	1	1
930	Q7XSQ9;Q01H94;A2XWD5;A0A0E0H479;P93435;C7J0T3;A6N0M3	Q7XSQ9;Q01H94;A2XWD5;A0A0E0H479;P93435;C7J0T3	Probable aquaporin PIP1-2;B0103C08-B0602B01.9 protein;Uncharacterized protein;Uncharacterized protein;Transmembrane protein;Os04g0559700 protein	B0103C08-B0602B01.9;Os04g0559700;OsI_16963;PIP1-2 Os04g0559700 LOC_Os04g47220 OsJ_015100 OSJNBa0084K11.2	1.12799	0.0123158	up	9.10841	8.93465	1841200000	1454100000	1694300000	679700000	740220000	673980000	9.16336	9.05835	9.10353	8.90576	8.98681	8.91139
933	B8BHS8;Q337D7;A0A0E0H4U8;Q8LN96;A3C6C0;Q0IWI3;A0A0P0XWC8	B8BHS8;Q337D7;A0A0E0H4U8;Q8LN96;A3C6C0;Q0IWI3;A0A0P0XWC8	Uncharacterized protein;Chaperone protein dnaJ 13, putative, expressed;Uncharacterized protein;Putative DnaJ domain containing protein;Uncharacterized protein;Os10g0507800 protein (Fragment);Os10g0507800 protein (Fragment)	Os10g0507800;Os10g0507800 LOC_Os10g36370 OSNPB_100507800;Os10g0507800 OSNPB_100507800;OsI_34260;OsJ_32105;OSJNBb0015K05.11	1.90474	0.699558	up	4.17045	3.24086	21154000	18701000	25974000	0	0	33946000	4.17142	4.13016	4.20977	1	1	7.72257
935	B8BHT2;Q8LN72;Q337D3;B9G6J9;Q337D4;A0A0E0H4V2	B8BHT2;Q8LN72;Q337D3;B9G6J9;Q337D4;A0A0E0H4V2	Methionine aminopeptidase;Methionine aminopeptidase;Methionine aminopeptidase;Methionine aminopeptidase;Methionine aminopeptidase;Uncharacterized protein	LOC_Os10g36470;LOC_Os10g36470 Os10g0508400 OSNPB_100508400;OsI_34265;OsJ_32109;OSJNBb0091N21.29	4.1997	0.116187	up	3.07028	1	0	20305000	13217000	0	0	0	1	4.14688	4.06397	1	1	1
936	Q94GX1;B8BHU3;A0A0E0H4X9;A0A0E0H4Y0	Q94GX1;B8BHU3;A0A0E0H4X9;A0A0E0H4Y0	Dehydration-responsive family protein, putative, expressed;Uncharacterized protein;Uncharacterized protein;Uncharacterized protein	Os10g0510400 LOC_Os10g36690 Os10g0510400 OsJ_32126 OSJNBa0005K07.2 OSNPB_100510400;OsI_34283	2.0407	0.373901	up	2.02906	1	14532000	0	0	0	0	0	4.08719	1	1	1	1	1
937	A0A0P0XW91;A6N061;A0A0E0H501;A2Z9A2;Q9FW07	A0A0P0XW91;A6N061;A0A0E0H501;A2Z9A2;Q9FW07	Os10g0512500 protein (Fragment);Crs1/yhby domain containing protein (Fragment);Uncharacterized protein;Uncharacterized protein;CRS1/YhbY domain containing protein, expressed	LOC_Os10g36860 Os10g0512500 OsJ_32140 OSJNBa0055O03.5 OSNPB_100512500;Os10g0512500 OSNPB_100512500;OsI_34297	2.91152	0.131279	up	2.54177	1	4206000	3534200	0	0	0	0	2.85768	3.76764	1	1	1	1
938	Q9XGY5;A2X8C8;A0A0E0JBJ6;Q7XUM9;Q01HK2;B8ATB0;A0A0E0H532	Q9XGY5;A2X8C8;A0A0E0JBJ6;Q7XUM9;Q01HK2;B8ATB0;A0A0E0H532	Mitochondrial import inner membrane translocase subunit Tim13;Uncharacterized protein;Uncharacterized protein;OSJNBa0064M23.16 protein;H0303A11-B0406H05.4 protein;Uncharacterized protein;Uncharacterized protein	H0303A11-B0406H05.4;Os04g0581300 Os04g0581300 OsJ_15898 OSJNBa0064M23.16 OSNPB_040581300;OsI_08486;OsI_17100;TIM13 Os02g0682600 LOC_Os02g45820 OJ1123_G04.16 OsJ_07945	2.2755	0.116121	up	2.18618	1	2798600	1743800	0	0	0	0	2.77331	2.78523	1	1	1	1
940	Q7X806;Q01HT8;A2XX59;A0A0E0H5I3	Q7X806;Q01HT8;A2XX59;A0A0E0H5I3	OSJNBa0041A02.4 protein;B0403H10-OSIGBa0105A11.10 protein;Uncharacterized protein;Uncharacterized protein	B0403H10-OSIGBa0105A11.10;Os04g0601400 Os04g0601400 OsJ_16037 OSJNBa0041A02.4 OSJNBa0083N12.20 OSNPB_040601400;OsI_17261	24.6418	0.116244	up	5.62303	1	92776000	155010000	0	0	0	0	7.81038	8.05872	1	1	1	1
941	Q7FAM9;Q01HT5;A2XX62;A0A0E0H5I6;B9F1Z3;B8AH83;Q6ZHJ9;A0A0E0GBR9	Q7FAM9;Q01HT5;A2XX62;A0A0E0H5I6;B9F1Z3;B8AH83;Q6ZHJ9;A0A0E0GBR9	V-type proton ATPase subunit G;V-type proton ATPase subunit G;V-type proton ATPase subunit G;V-type proton ATPase subunit G;V-type proton ATPase subunit G;V-type proton ATPase subunit G;Putative Vacuolar ATP synthase subunit G 1;Uncharacterized protein	B0403H10-OSIGBa0105A11.13;OJ1111_E07.26-1 OJ1218_D07.1-1;Os04g0601700 OsJ_16040 OSJNBa0041A02.7 OSJNBa0083N12.23 OSNPB_040601700;OsI_08596;OsI_17264;OsJ_08056	1.0595	0.973497	up	5.2819	5.19851	42283000	25524000	26782000	0	11983000	10599000	7.43424	4.19375	4.2177	1	7.30065	7.29489
942	Q7XSS2;Q01HT3;A0A0E0H5I9;Q0JAF4;B8ATW7;A6N036	Q7XSS2;Q01HT3;A0A0E0H5I9;Q0JAF4;B8ATW7;A6N036	OSJNBa0041A02.10 protein;B0403H10-OSIGBa0105A11.15 protein;Uncharacterized protein;Os04g0602100 protein;Uncharacterized protein;Chloroplast l-ascorbate peroxidase (Fragment)	B0403H10-OSIGBa0105A11.15;Os04g0602100 Os04g0602100 OsJ_16043 OSNPB_040602100;OsI_17267;OSJNBa0041A02.10	1.27544	0.000165209	up	8.00402	7.65303	131320000	134770000	138130000	30383000	28429000	30803000	7.99447	7.99776	8.01984	7.64459	7.61566	7.69885
943	Q7XTQ5;Q0JAF1;Q01HT0;A0A0E0H5J4;A3AX42;A2XX68	Q7XTQ5;Q0JAF1;Q01HT0;A0A0E0H5J4;A3AX42;A2XX68	Maltose excess protein 1-like, chloroplastic;Maltose transporter;B0403H10-OSIGBa0105A11.18 protein;Uncharacterized protein;Uncharacterized protein;Uncharacterized protein	B0403H10-OSIGBa0105A11.18;MEX1 Os04g0602400;Os04g0602400 LOC_Os04g51330 OSJNBa0041A02.13;OsI_17270;OsJ_16046	29.876	0.00221815	up	5.90092	1	28761000	30240000	34474000	0	0	0	5.19909	5.19806	7.30559	1	1	1
945	Q0JAC6;B8ATU3;Q7X8D0;A0A0E0H5N0;A0A0P0XDJ9;Q6YYR2;A2YSN9;A0A0E0I8R0;A3BQX7;A6N0X3	Q0JAC6;B8ATU3;Q7X8D0;A0A0E0H5N0;A0A0P0XDJ9;Q6YYR2;A2YSN9;A0A0E0I8R0;A3BQX7	Os04g0605900 protein;Uncharacterized protein;OSJNBa0035M09.3 protein;Uncharacterized protein;Os08g0234000 protein;Os08g0234000 protein;Uncharacterized protein;Uncharacterized protein;Uncharacterized protein	Os04g0605900 Os04g0605900 OsJ_16070 OSNPB_040605900;Os08g0234000 B1047A05.37 OSNPB_080234000;Os08g0234000 OSNPB_080234000;OsI_17293;OsI_28337;OsJ_26511;OSJNBa0035M09.3 OSJNBb0015N08.13	121.042	3.12057e-10	up	7.91936	1	123660000	110070000	112230000	0	0	0	7.94915	7.88522	7.92371	1	1	1
946	Q7XPL5;Q01JS8;Q0JA93;B8ATX6;A0A0E0H5T6	Q7XPL5;Q01JS8;Q0JA93;B8ATX6;A0A0E0H5T6	Methionine aminopeptidase;Methionine aminopeptidase;Methionine aminopeptidase;Methionine aminopeptidase;Methionine aminopeptidase	Os04g0610500 Os04g0610500 OsJ_16114 OSNPB_040610500;OsI_17343;OSIGBa0152L12.6;OSJNBa0085I10.11	4.5688	0.373901	up	3.19182	1	55969000	0	0	0	0	0	7.57545	1	1	1	1	1
948	Q9MAX6;B8AU46;A0A0E0H5V1	Q9MAX6;B8AU46;A0A0E0H5V1	Coatomer subunit epsilon-1;Coatomer subunit epsilon;Coatomer subunit epsilon	COPE1 Os04g0612600 LOC_Os04g52270 OsJ_015440 OSJNBa0070C17.12;OsI_17362	92.2255	1.04475e-06	up	7.52709	1	40022000	40700000	87098000	0	0	0	7.3932	7.39414	7.79394	1	1	1
949	A0A0N7KJP5;A0A0E0H5X4;Q7XN11;Q01K11;Q8W2G1	A0A0N7KJP5;A0A0E0H5X4;Q7XN11;Q01K11	Os04g0614600 protein (Fragment);Uncharacterized protein;Gamma-aminobutyrate transaminase 1, mitochondrial;Gamma-aminobutyrate transaminase 1, mitochondrial	Os04g0614600 OSNPB_040614600;OsI_17385 OSIGBa0126B18.7;OSL2 Os04g0614600 LOC_Os04g52450 OsJ_16145 OSJNBa0008M17.4	120.398	3.0433e-08	up	7.91167	1	93973000	139570000	107400000	0	0	0	7.81973	8.01984	7.89544	1	1	1
950	B8AU77;B9FCI4;A2XXK2;Q7XTP3;Q0JA42;Q7XTP2;B9FCI5;B9FCI1;A0A0N7KJP8;Q7XTP6;Q25AF1;B8AU76;A0A0E0H5Z2;A0A0E0H600;A0A0E0H5Z9;A0A0E0H5Z8;A0A0E0H5Z1;A0A0E0H5Z7;A0A0E0H5Z6;A0A0E0H5Z5;A0A0E0H5Z4;A0A0E0H5Z3;A0A0E0H5Z0;Q0JA43;A0A0P0WER5;Q00RR0;Q00RQ9	B8AU77;B9FCI4;A2XXK2;Q7XTP3;Q0JA42;Q7XTP2;B9FCI5;B9FCI1;A0A0N7KJP8;Q7XTP6;Q25AF1;B8AU76;A0A0E0H5Z2;A0A0E0H600;A0A0E0H5Z9;A0A0E0H5Z8;A0A0E0H5Z1;A0A0E0H5Z7;A0A0E0H5Z6;A0A0E0H5Z5;A0A0E0H5Z4;A0A0E0H5Z3;A0A0E0H5Z0;Q0JA43;A0A0P0WER5;Q00RR0;Q00RQ9	Uncharacterized protein;Uncharacterized protein;Uncharacterized protein;OSJNBa0093O08.4 protein;Os04g0616700 protein;OSJNBa0093O08.5 protein;Uncharacterized protein;Uncharacterized protein;Os04g0616700 protein;OSJNBa0093O08.1 protein;H0525G02.12 protein;Un	H0525G02.10;H0525G02.11;H0818E11.1 H0525G02.12;Os04g0616600 Os04g0616600 OSNPB_040616600;Os04g0616700;Os04g0616700 OSNPB_040616700;OsI_17410;OsI_17411;OsI_17412;OsJ_16159;OsJ_16162;OsJ_16163;OSJNBa0093O08.1 Os04g0616300 OSNPB_040616300;OSJNBa0093O08.4;OSJNBa0093O08.5	86.9908	7.74635e-09	up	7.44279	1	43381000	50294000	38949000	0	0	0	7.45043	7.50554	7.37241	1	1	1
951	Q8GU51;Q7XTT6;A0A0E0H645;A3AXH7;Q01JU7;A2XXN8;Q0JA19;A0A0P0WF03	Q8GU51;Q7XTT6;A0A0E0H645;A3AXH7;Q01JU7;A2XXN8	MRP-like ABC transporter (Fragment);OSJNBa0058K23.17 protein;Uncharacterized protein;Uncharacterized protein;H0714H04.5 protein;Uncharacterized protein	H0714H04.5;mrp1;Os04g0620000 Os04g0620000 OSNPB_040620000;Os04g0620066 OSNPB_040620066;OsI_17449;OsJ_16196;OSJNBa0058K23.17	1.0294	0.461393	up	8.33684	8.29504	228380000	309220000	297030000	164230000	160170000	136770000	8.24607	8.39552	8.36894	8.31016	8.32473	8.25021
952	Q7XPR2;Q01KC0;A0A0E0H666;B7ENR4;A3AXK2;B8AUI9;A0A0P0WF18	Q7XPR2;Q01KC0;A0A0E0H666;B7ENR4;A3AXK2;B8AUI9;A0A0P0WF18	Aminomethyltransferase;Aminomethyltransferase;Aminomethyltransferase;Aminomethyltransferase (Fragment);Aminomethyltransferase;Uncharacterized protein;Aminomethyltransferase (Fragment)	H0215F08.10;Os04g0623800 Os04g0623800 OSJNBa0053K19.11 OSNPB_040623800;Os04g0623800 OSNPB_040623800;OsI_17482;OsJ_16220	1.60707	0.000745221	up	8.31384	7.62941	272530000	296890000	226460000	37082000	29528000	20532000	8.31366	8.37496	8.25291	7.74132	7.62957	7.51735
954	Q7XTM4;Q25A82;A2XY76;A0A0E0H6H0	Q7XTM4;Q25A82;A2XY76;A0A0E0H6H0	OSJNBa0033G05.21 protein;H0413E07.12 protein;Uncharacterized protein;Uncharacterized protein	H0413E07.12;OsI_17661;OsJ_16397 OSJNBa0033G05.21 OSJNBa0070O11.1	8.46383	1.15751e-09	up	4.08131	1	13428000	16474000	13818000	0	0	0	4.06676	4.10398	4.07319	1	1	1
955	Q0J9L0;Q7XQE6;B8AV88;A0A0E0H6H2	Q0J9L0;Q7XQE6;B8AV88;A0A0E0H6H2	Os04g0645100 protein (Fragment);OSJNBa0070O11.2 protein;Uncharacterized protein;Uncharacterized protein	Os04g0645100;Os04g0645100 OsJ_16398 OSJNBa0070O11.2 OSNPB_040645100;OsI_17662	1.90873	0.373901	up	1.93262	1	4571100	0	0	0	0	0	3.79785	1	1	1	1	1
956	Q94DD0;A2WX66;A0A0E0H6J5;B9EUS9;A0A0E0H6J3	Q94DD0;A2WX66;A0A0E0H6J5;B9EUS9;A0A0E0H6J3	Os01g0859200 protein;Uncharacterized protein;Uncharacterized protein;Uncharacterized protein;Uncharacterized protein	Os01g0859200 Os01g0859200 OSNPB_010859200 P0489B03.7 P0683F02.35;OsI_04508;OsJ_04141	8.55745	3.1718e-08	up	4.09718	1	18271000	12843000	15781000	0	0	0	4.14088	4.04963	4.10103	1	1	1
957	Q5N7C8;B9EUT1;B8ACI4;A0A0E0H6K1	Q5N7C8;B9EUT1;B8ACI4;A0A0E0H6K1	Os01g0859400 protein;Uncharacterized protein;Uncharacterized protein;Uncharacterized protein	OsI_04510;OsJ_04143;P0489B03.12-1 P0679C12.2-1 Os01g0859400 OSNPB_010859400	3.8457	0.450479	up	7.59491	5.65167	49800000	60590000	66186000	0	72093000	67045000	7.53176	7.60481	7.64816	1	7.98289	7.97211
959	Q25AM8;Q7XMP9;B8AVK6;A0A0E0H6Q1	Q25AM8;Q7XMP9;B8AVK6;A0A0E0H6Q1	H0212B02.11 protein;OSJNBb0059K02.12 protein;Uncharacterized protein;Uncharacterized protein	H0212B02.11 OSIGBa0113E10.1;Os04g0650500 Os04g0650500 OsJ_16429 OSJNBb0059K02.12 OSNPB_040650500;OsI_17698	1.92276	0.373901	up	1.94318	1	0	4673400	0	0	0	0	1	3.82953	1	1	1	1
960	B9FCV6;Q7XMP6;Q25AL6;A2XYC2;A0A0E0H6Q4	B9FCV6;Q7XMP6;Q25AL6;A2XYC2;A0A0E0H6Q4	D-3-phosphoglycerate dehydrogenase;D-3-phosphoglycerate dehydrogenase;D-3-phosphoglycerate dehydrogenase;D-3-phosphoglycerate dehydrogenase;D-3-phosphoglycerate dehydrogenase	H0212B02.14 OSIGBa0113E10.4;Os04g0650800 Os04g0650800 OSJNBb0059K02.15 OSNPB_040650800;OsI_17701;OsJ_16432	3.52571	0.525405	up	5.22808	3.41017	25718000	34884000	25904000	0	0	131880000	4.21114	7.26391	4.2092	1	1	8.23051
961	Q7XPM7;A3AY48;A0A0E0H6S2;A2XYD6;A0A0P0WFP9	Q7XPM7;A3AY48;A0A0E0H6S2;A2XYD6;A0A0P0WFP9	OSJNBa0060D06.17 protein;Uncharacterized protein;Uncharacterized protein;Uncharacterized protein;Os04g0653100 protein	Os04g0653100 OSJNBa0060D06.17;Os04g0653100 OSNPB_040653100;OsI_17714;OsJ_16441	1.56735	0.786948	up	3.89173	3.2434	6325000	6550000	5299400	0	0	34534000	3.91027	3.89769	3.86723	1	1	7.7302
964	B7E8Y8;Q01HZ7;P14655;B8AVN6;A0A0E0H6Y4	B7E8Y8;Q01HZ7;P14655;B8AVN6;A0A0E0H6Y4	cDNA clone:001-119-H04, full insert sequence;Glutamine synthetase;Glutamine synthetase, chloroplastic;Glutamine synthetase;Glutamine synthetase	GLN2 RGS31 Os04g0659100 LOC_Os04g56400 OsJ_16481 OSJNBa0011F23.15 OSJNBa0015K02.2;OsI_17756;OSIGBa0132E09-OSIGBa0108L24.11	153.517	3.68702e-11	up	8.26226	1	239460000	238420000	223050000	0	0	0	8.2711	8.27611	8.23957	1	1	1
965	Q9ZR36;Q7FAY6;A0A0E0H6Z7;O82706;B9FCY4;B8AW08;A0A0E0H6Z8;Q8S3N4	Q9ZR36;Q7FAY6;A0A0E0H6Z7;O82706;B9FCY4;B8AW08;A0A0E0H6Z8;Q8S3N4	Amylogenin;Probable inactive UDP-arabinopyranose mutase 2;Uncharacterized protein;RGP2 protein (Fragment);Uncharacterized protein;Uncharacterized protein;Uncharacterized protein;Putative amylogenin	24K23.23;amy H0112G12.3;OsI_17769;OsJ_16492;RPG2;UAM2 RGP2 Os04g0660400 LOC_Os04g56520 OSJNBa0015K02.13	1.99864	0.373901	up	1.99902	1	0	0	9938100	0	0	0	1	1	3.99705	1	1	1
966	A0A0P0VJR5;A3A7E8;A2X5E8;Q7XQZ5;Q01JL0;B8AVX6;A0A0E0H704	A0A0P0VJR5;A3A7E8;A2X5E8;Q7XQZ5;Q01JL0;B8AVX6;A0A0E0H704	Os02g0519300 protein;Uncharacterized protein;Uncharacterized protein;OSJNBa0015K02.19 protein;H0112G12.10 protein;Uncharacterized protein;Uncharacterized protein	H0112G12.10;Os02g0519300 OSNPB_020519300;Os04g0661300 Os04g0661300 OsJ_16499 OSJNBa0015K02.19 OSNPB_040661300;OsI_07426;OsI_17778;OsJ_06928	19.2834	0.123917	up	7.46595	3.19666	48089000	40470000	50058000	0	25885000	0	7.51164	7.38852	7.4977	1	7.58999	1
971	B9FD99;Q7XQ93;Q259I0;A0A0E0H7F0;B8ARF5	B9FD99;Q7XQ93;Q259I0;A0A0E0H7F0;B8ARF5	Uncharacterized protein;OSJNBa0018M05.15 protein;H0103C06.2 protein;Uncharacterized protein;Uncharacterized protein	H0103C06.2 H0403D02.18;Os04g0674700 OSJNBa0018M05.15 OSNPB_040674700;OsI_17900;OsJ_16604	18.7795	0.0139338	up	5.23109	1	32452000	27854000	27289000	0	0	0	7.25619	4.21431	4.22276	1	1	1
973	Q7XKC8;Q259H4;A2XYX9;A0A0E0H7G3	Q7XKC8;Q259H4;A2XYX9;A0A0E0H7G3	Dihydroorotate dehydrogenase (quinone), mitochondrial;Dihydroorotate dehydrogenase (quinone), mitochondrial;Dihydroorotate dehydrogenase (quinone), mitochondrial;Dihydroorotate dehydrogenase (quinone), mitochondrial	H0103C06.13 H0101F08.3;OsI_17913;PYRD Os04g0676300 LOC_Os04g57950 OsJ_16613 OSJNBa0064G10.3	99.7009	8.07718e-09	up	7.63954	1	58803000	60137000	75717000	0	0	0	7.59628	7.60243	7.7199	1	1	1
974	Q7XKB5;Q259K4;A2XYZ3;A0A0E0H7H7	Q7XKB5;Q259K4;A2XYZ3;A0A0E0H7H7	Pyruvate kinase;Pyruvate kinase;Pyruvate kinase;Pyruvate kinase	H0402C08.9;Os04g0677500 Os04g0677500 OsJ_16627 OSJNBa0064G10.16 OSNPB_040677500;OsI_17926	96.7624	2.72987e-08	up	7.59637	1	56661000	51020000	72859000	0	0	0	7.58024	7.51164	7.69724	1	1	1
975	A0A0E0H7I5;Q7XKA9;Q259E5;A2XYZ8;A0A0E0H7I2;A0A0E0H7I3;A0A0E0H7I4	A0A0E0H7I5;Q7XKA9;Q259E5;A2XYZ8;A0A0E0H7I2;A0A0E0H7I3;A0A0E0H7I4	Uncharacterized protein;OSJNBa0064G10.22 protein;H0402C08.14 protein;Uncharacterized protein;Uncharacterized protein;Uncharacterized protein;Uncharacterized protein	H0801D08.4 H0402C08.14;Os04g0678200 Os04g0678200 OsJ_16632 OSJNBa0064G10.22 OSNPB_040678200;OsI_17931	23.0405	0.116117	up	5.5261	1	89167000	89837000	0	0	0	0	7.78141	7.79689	1	1	1	1
977	Q8LMW8;A2Z5N7;A0A0E0H7N5;B9G7V7	Q8LMW8;A2Z5N7;A0A0E0H7N5;B9G7V7	Os10g0191300 protein;Uncharacterized protein;Uncharacterized protein;Uncharacterized protein	Os10g0191300 LOC_Os10g11500 Os10g0191300 OSJNBa0040E17.3 OSNPB_100191300;OsI_32961;OsJ_30952	4.11172	0.116183	up	3.03974	1	15606000	11209000	0	0	0	0	4.09924	4.01998	1	1	1	1
978	Q10KU0;A2XH76;A0A0E0H7P7	Q10KU0;A2XH76;A0A0E0H7P7	Expressed protein;Uncharacterized protein;Uncharacterized protein	Os03g0370400 LOC_Os03g25440 Os03g0370400 OsJ_10999 OSJNBa0013M12.6 OSNPB_030370400;OsI_11750	2.07345	0.373901	up	2.05203	1	19552000	0	0	0	0	0	4.1561	1	1	1	1	1
980	Q7XPW1;A0A0P0WGH1;B9FDD1;B8ARS2;Q259F9;A0A0E0H7T1;A0A0E0H7T0;A0A0P0WGH3;A0A0P0WGL6;A0A0E0H7T2	Q7XPW1;A0A0P0WGH1;B9FDD1;B8ARS2;Q259F9;A0A0E0H7T1;A0A0E0H7T0;A0A0P0WGH3	OSJNBa0032F06.20 protein;Os04g0682800 protein (Fragment);Uncharacterized protein;Uncharacterized protein;H0124B04.17 protein;Uncharacterized protein;Uncharacterized protein;Os04g0682800 protein (Fragment)	H0124B04.17;Os04g0682800 OSJNBa0032F06.20;Os04g0682800 OSNPB_040682800;OsI_17972;OsJ_16670	18.7041	0.0149494	up	5.22528	1	24055000	24817000	33701000	0	0	0	4.19811	4.18737	7.29036	1	1	1
983	B9FDD6;Q7XPV4;Q259Q6;A2XZ41;A0A0E0H7X1	B9FDD6;Q7XPV4;Q259Q6;A2XZ41;A0A0E0H7X1	Uncharacterized protein;OSJNBa0088H09.2 protein;H0306F12.7 protein;Uncharacterized protein;Uncharacterized protein	H0306F12.7;Os04g0683700 Os04g0683700 OSJNBa0088H09.2 OSNPB_040683700;OsI_17978;OsJ_16677	8.14359	1.55646e-06	up	4.02566	1	20312000	8285700	8808100	0	0	0	4.16208	3.94998	3.96494	1	1	1
984	Q7XPV3;A0A0E0H7X2;Q259Q9;B9FDD7;B8ARS7;Q8H2Q5;A2YLB1;A0A0E0I0T8	Q7XPV3;A0A0E0H7X2;Q259Q9;B9FDD7;B8ARS7;Q8H2Q5;A2YLB1;A0A0E0I0T8	OSJNBa0088H09.3 protein;Uncharacterized protein;Glutathione peroxidase;Glutathione peroxidase;Glutathione peroxidase;Os07g0483500 protein;Uncharacterized protein;Uncharacterized protein	H0306F12.8;OJ1136_F08.109 P0045A07.133 Os07g0483500 OsJ_24259 OSNPB_070483500;Os04g0683800 Os04g0683800 OSJNBa0088H09.3 OSNPB_040683800;OsI_17979;OsI_26008;OsJ_16678	3.96489	0.116145	up	2.98728	1	7602200	0	10169000	0	0	0	3.95575	1	4.00609	1	1	1
985	B8ARS9;B9FDE0;A0A0E0H7X8;Q259U8	B8ARS9;B9FDE0;A0A0E0H7X8;Q259U8	Uncharacterized protein;Probable serine/threonine-protein kinase BSK3;Uncharacterized protein;H0913C04.1 protein	BSK3 RLCK173 Os04g0684200 LOC_Os04g58750 OsJ_16683 OSJNBa0088H09.6;H0913C04.1;OsI_17982	7.93384	1.41823e-11	up	3.98802	1	9117000	9374400	9821800	0	0	0	3.98775	3.98174	3.99457	1	1	1
986	Q0J8V7;Q7XPU2;Q259U6;A2XZ54;A0A0E0H7Y6;B9FDE4	Q0J8V7;Q7XPU2;Q259U6;A2XZ54;A0A0E0H7Y6;B9FDE4	Os04g0685200 protein (Fragment);OSJNBa0088H09.14 protein;H0913C04.10 protein;Uncharacterized protein;Uncharacterized protein;Uncharacterized protein	H0913C04.10;Os04g0685200 Os04g0685200 OSNPB_040685200;OsI_17992;OsJ_16693;OSJNBa0088H09.14	4.31845	0.373901	up	3.11051	1	0	37374000	0	0	0	0	1	7.33154	1	1	1	1
987	Q7XPU1;Q259U5;O49148;A2XZ55;A0A0E0H7Y7;A6N0S3	Q7XPU1;Q259U5;O49148;A2XZ55;A0A0E0H7Y7	OSJNBa0088H09.15 protein;H0913C04.11 protein;Harpin induced gene 1 homolog;Uncharacterized protein;Uncharacterized protein	H0913C04.11;Hin1;Os04g0685300 OSJNBa0088H09.15 OSNPB_040685300;OsI_17993	1.04573	0.703375	up	7.91505	7.85054	61463000	130430000	183590000	47371000	51673000	51395000	7.61974	7.97211	8.15331	7.826	7.8404	7.88522
988	Q9ST79;A0A0E0H815;A2XZ77;B9FDQ2	Q9ST79;A0A0E0H815;A2XZ77;B9FDQ2	CAA303718.1 protein;Uncharacterized protein;Uncharacterized protein;Uncharacterized protein	OsI_18016;OsJ_16714;q3037.18 H0701F11.9 H0814G11.2	8.40054	2.0142e-10	up	4.07048	1	13834000	14963000	12721000	0	0	0	4.07509	4.08034	4.05601	1	1	1
990	Q7XSS8;Q259V3;A2XZ94;A0A0E0H834;Q40716;Q0J8R9	Q7XSS8;Q259V3;A2XZ94;A0A0E0H834;Q40716;Q0J8R9	OSJNBa0039K24.28 protein;B0518A01.1 protein;Uncharacterized protein;Uncharacterized protein;22 kDa protein of photosystem II;Os04g0690800 protein	B0518A01.1 H0814G11.22;Os04g0690800 Os04g0690800 OSNPB_040690800;OsI_18034;OsJ_16732 OSJNBa0039K24.28;PSII-S	3.99084	0.473204	up	5.28076	3.28407	27647000	24742000	43406000	50002000	0	0	4.22542	4.1868	7.43005	7.8522	1	1
991	Q9ZST1;B8AS60;A0A0E0H841	Q9ZST1;B8AS60;A0A0E0H841	30S ribosomal protein S17, chloroplastic;Uncharacterized protein;Uncharacterized protein	OsI_18045;RPS17 Os04g0691500 Os04g0691600 LOC_Os04g59494 OsJ_16738 OSJNBb0020J19.5	8.65331	1.21093e-08	up	4.11325	1	16633000	20374000	13910000	0	0	0	4.11602	4.14793	4.0758	1	1	1
992	A0A0P0WMQ4;Q5TKJ0;B8AYI7;A0A0E0HEW0;A2XZA5;Q7XKA3;A3AYY0;A0A0E0H845;A0A0P0WMV9;Q60EW9;A2Y3X0;A0A0E0HDI8;B9FFP0;Q7XR21;Q01IK6;Q69T22;A2YF05;A0A0E0HTG6;Q0JCF9;A0A0E0H220	A0A0P0WMQ4;Q5TKJ0;B8AYI7;A0A0E0HEW0;A2XZA5;Q7XKA3;A3AYY0;A0A0E0H845;A0A0P0WMV9;Q60EW9;A2Y3X0;A0A0E0HDI8;B9FFP0;Q7XR21;Q01IK6;Q69T22;A2YF05;A0A0E0HTG6;Q0JCF9;A0A0E0H220	Os05g0429700 protein (Fragment);Os05g0429700 protein;Uncharacterized protein;Uncharacterized protein;Uncharacterized protein;OSJNBb0020J19.7 protein;Uncharacterized protein;Uncharacterized protein;Os05g0429700 protein;FT-interacting protein 7;Uncharacteriz	FTIP1 Os06g0614000 LOC_Os06g41090 OsJ_21968 P0417G12.28 P0691E09.4;FTIP7 Os05g0370600 LOC_Os05g30750 OJ1118_F06.6 OsJ_18293;H0305E08.5;Os04g0472900 Os04g0472900 OSNPB_040472900;Os04g0691800 Os04g0691800 OSJNBb0020J19.7 OSNPB_040691800;Os05g0429700 OsJ_18631 OSJNBb0048I21.7 OSNPB_050429700;Os05g0429700 OSNPB_050429700;OsI_18047;OsI_19693;OsI_20060;OsI_23701;OsJ_15155;OsJ_16741;OSJNBb0022F23.9	4.24007	0.116124	up	3.08409	1	16462000	19669000	0	0	0	0	4.11251	4.13976	1	1	1	1
993	A0A0E0H866;B9FDT1;A0A0E0H867;B8AS57;A0A0P0WGP2;A0A0P0WGR7	A0A0E0H866;B9FDT1;A0A0E0H867;B8AS57;A0A0P0WGP2;A0A0P0WGR7	Dolichyl-diphosphooligosaccharide--protein glycosyltransferase subunit 1;Dolichyl-diphosphooligosaccharide--protein glycosyltransferase subunit 1B;Dolichyl-diphosphooligosaccharide--protein glycosyltransferase subunit 1;Dolichyl-diphosphooligosaccharide--p	Os04g0693000 OSNPB_040693000;OsI_18067;OST1B RPN1B Os04g0693000 OsJ_16761	24.7939	0.116123	up	5.63191	1	0	119800000	125980000	0	0	0	1	7.92003	7.97571	1	1	1
995	Q9FW34;A0A0E0H888;B8AWJ0;A0A0P0WGS3	Q9FW34;A0A0E0H888;B8AWJ0;A0A0P0WGS3	Os05g0101400 protein;Uncharacterized protein;Uncharacterized protein;Os05g0101400 protein (Fragment)	Os05g0101400 Os05g0101400 OsJ_16775 OSJNBb0098I11.9 OSNPB_050101400 P0036D10.8;Os05g0101400 OSNPB_050101400;OsI_18082	149.443	3.32717e-07	up	8.22345	1	367790000	177890000	163990000	0	0	0	8.44433	8.13035	8.09568	1	1	1
996	B9FLZ7;B8AWJ6;B7EUG6;Q0DLG8;A0A0E0H8A2	B9FLZ7;B8AWJ6;B7EUG6;Q0DLG8;A0A0E0H8A2	Uncharacterized protein;Uncharacterized protein;cDNA clone:J033125H15, full insert sequence;Os05g0103100 protein;Uncharacterized protein	Os05g0103100 Os05g0103100 OSNPB_050103100;OsI_18092;OsJ_16788	144.29	1.01879e-09	up	8.17283	1	203690000	202290000	170880000	0	0	0	8.2038	8.1933	8.1214	1	1	1
997	Q0DLG4;B8AWJ7;A0A0E0H8A7;A0A0E0H8A6;B9FLZ8	Q0DLG4;B8AWJ7;A0A0E0H8A7;A0A0E0H8A6;B9FLZ8	Os05g0103500 protein;Uncharacterized protein;Uncharacterized protein;Uncharacterized protein;Uncharacterized protein	Os05g0103500 Os05g0103500 OSNPB_050103500;OsI_18096;OsJ_16792	4.29375	0.116117	up	3.10224	1	0	20877000	20648000	0	0	0	1	4.15262	4.15409	1	1	1
998	Q75M18;B8AWY8;A0A0E0H8B9;A0A0E0H8C0	Q75M18;B8AWY8;A0A0E0H8B9;A0A0E0H8C0	Methionine S-methyltransferase;Methionine S-methyltransferase;Methionine S-methyltransferase;Methionine S-methyltransferase	Os05g0105000 Os05g0105000 OsJ_16807 OSJNBb0035J08.4 OSNPB_050105000 P0668H12.19;OsI_18110	4.11811	0.116125	up	3.04198	1	0	14790000	12271000	0	0	0	1	4.07707	4.04888	1	1	1
1000	A0A0P0WHB7;Q0DLD4;Q8GU57;A0A0E0H8E8;B9FM21;B8AWX1;A0A0E0H8E7;Q84ZW6;A6MZM1;Q65X28	A0A0P0WHB7;Q0DLD4;Q8GU57;A0A0E0H8E8;B9FM21;B8AWX1;A0A0E0H8E7;Q84ZW6	Os05g0107600 protein (Fragment);Os05g0107600 protein (Fragment);Peroxisomal membrane protein ABC transporter homologue;Uncharacterized protein;Uncharacterized protein;Uncharacterized protein;Uncharacterized protein;Putative ABC transporter	Os05g0107600 Os05g0107600 OSNPB_050107600;Os05g0107600 OSNPB_050107600;OsI_18139;OsJ_16830;OSJNBa0068N01.7;pmp2	8.57865	4.84526e-08	up	4.10075	1	12481000	16576000	20369000	0	0	0	4.04783	4.10501	4.14941	1	1	1
1001	P49100;I3QD60;A2XZJ1;A0A0E0H8G5	P49100;I3QD60;A2XZJ1;A0A0E0H8G5	Cytochrome b5;Cytochrome b5 protein;Uncharacterized protein;Uncharacterized protein	Os05g0108800 LOC_Os05g01820 OsJ_16839 OSJNBa0068N01.16;OsI_18149	98.3	1.17948e-10	up	7.61912	1	62076000	66606000	60741000	0	0	0	7.62673	7.63854	7.59209	1	1	1
1003	Q65XA1;B9FM56;A2XZP5;A0A0E0H8N6;A2XZQ4	Q65XA1;B9FM56;A2XZP5;A0A0E0H8N6;A2XZQ4	Os05g0116000 protein;Uncharacterized protein;Uncharacterized protein;Uncharacterized protein;Uncharacterized protein	Os05g0116000 OJ1654_B10.17 OSNPB_050116000 P0496H07.7;OsI_18204;OsI_18214;OsJ_16892	1.68793	0.764903	up	4.11456	3.3593	16534000	16954000	17414000	93361000	0	0	4.11411	4.11128	4.1183	8.07791	1	1
1005	Q9LIV9;A2XZS8;A0A0E0H8R9	Q9LIV9;A2XZS8;A0A0E0H8R9	Uncharacterized protein;Uncharacterized protein;Uncharacterized protein	OsI_18241;OsJ_16928	8.955	0.155234	up	4.16269	1	32609000	29116000	0	0	0	0	7.26391	4.22416	1	1	1	1
1006	Q60F44;A2XZT5;A0A0E0H8T1	Q60F44;A2XZT5;A0A0E0H8T1	Os05g0121500 protein;Uncharacterized protein;Uncharacterized protein	Os05g0121500 Os05g0121500 OJ1001_G01.8 OsJ_16936 OSNPB_050121500;OsI_18247	3.92383	0.116298	up	2.97226	1	5908400	0	10765000	0	0	0	3.89517	1	4.02162	1	1	1
1007	A0A0P0WHC7;Q75L87;B8AXD3;A0A0E0H8V8	A0A0P0WHC7;Q75L87;B8AXD3;A0A0E0H8V8	Os05g0122800 protein;Os05g0122800 protein;Uncharacterized protein;Uncharacterized protein	Os05g0122800 OJ1729_E02.7 OsJ_16943 OSNPB_050122800;Os05g0122800 OSNPB_050122800;OsI_18258	8.63492	3.50218e-07	up	4.11018	1	13515000	13280000	25546000	0	0	0	4.06838	4.05554	4.20662	1	1	1
1008	Q688R1;A2XZZ6;A0A0E0H8X4;A0A0E0H8X3;A0A0E0H8X2	Q688R1;A2XZZ6;A0A0E0H8X4;A0A0E0H8X3;A0A0E0H8X2	Metal tolerance protein 1;Metal/metalloid transporter protein;Uncharacterized protein;Uncharacterized protein;Uncharacterized protein	MTP1 Os05g0128400 LOC_Os05g03780 OsJ_16988 OSJNBa0056I11.9;MTP1 OsI_18302	1.98368	0.373901	up	1.98818	1	0	8739400	0	0	0	0	1	3.96454	1	1	1	1
1009	A0A0E0H904;B8AXM5;Q0DL03;A0A0E0H903;B7EY68	A0A0E0H904;B8AXM5;Q0DL03;A0A0E0H903;B7EY68	Uncharacterized protein;Uncharacterized protein;Os05g0132100 protein;Uncharacterized protein;cDNA clone:001-200-C01, full insert sequence	Os05g0132100 Os05g0132100 OsJ_17009 OSNPB_050132100;OsI_18335	122.512	4.1393e-07	up	7.93678	1	160280000	78316000	122760000	0	0	0	8.11392	7.72815	7.96827	1	1	1
1010	A0A0E0H916;E9KIT5;Q7DNB2;Q6ENA1;P0C337;P0C336;P0C335;J3RG86;A0A1W5HWQ2;A0A1W5HNW4;A0A0N9E0G9;A0A0N7EIU4;A0A0K0LRI3;A0A0K0LRC8;A0A0K0LKX1;A0A0E0HNW2;C5MRJ8;C5MRJ4;C5MRJ2;A0A0E0I3F4;Q8SAU0;Q7G6A6;D0EKL8;D0EKL7;A0A0E0GPN8	A0A0E0H916;E9KIT5;Q7DNB2;Q6ENA1;P0C337;P0C336;P0C335;J3RG86;A0A1W5HWQ2;A0A1W5HNW4;A0A0N9E0G9;A0A0N7EIU4;A0A0K0LRI3;A0A0K0LRC8;A0A0K0LKX1;A0A0E0HNW2	Uncharacterized protein;NADH-plastoquinone oxidoreductase subunit 7;OSJNBa0061C08.3 protein;NAD(P)H-quinone oxidoreductase subunit H, chloroplastic;NAD(P)H-quinone oxidoreductase subunit H, chloroplastic;NAD(P)H-quinone oxidoreductase subunit H, chloroplas	ndhH;ndhH 9311163 9311175;ndhH LOC_Osp1g00970 Nip164 Nip176;ndhH PA164 PA176;OSJNAb0075K12.32 LOC_Os10g21340;OSJNBa0022D10.3;OSJNBa0061C08.3	165.049	4.1269e-10	up	8.36675	1	285190000	277370000	320930000	0	0	0	8.33826	8.35376	8.40823	1	1	1
1011	A0A0E0H918;Q0DKZ2;Q6AVZ8;A2Y043;B9FMB0;Q5U1M6;A2Y045;A0A0P0WHP0	A0A0E0H918;Q0DKZ2;Q6AVZ8;A2Y043	Peroxidase;Os05g0134400 protein;Peroxidase;Peroxidase	Os05g0134400 Os05g0134400 OSNPB_050134400;Os05g0134400 prx65 OSNPB_050134400 P0519E07.5;Os05g0134800 OSNPB_050134800;OsI_18348;OsI_18350;OsJ_17020;prx67 Os05g0134800 OsJ_17022	101.499	2.97834e-13	up	7.66532	1	68860000	71436000	67764000	0	0	0	7.66506	7.67089	7.66	1	1	1
1012	Q0DKY4;B7EKA4;A2Y053;A0A0E0H922;Q1H9D3;Q1H9D0;Q1H9C8;Q1H9C4;Q1H9C0;Q1H9B9;Q1H9B6;Q1H9B3;Q1H9A4;Q1H9A2;Q1H997;Q1H994;Q1H993;Q1H992;Q1H990;Q1H989;Q1H981;Q1H977;Q1H970;Q1H969;Q1H968;Q1H964;Q1H961;Q1H960;A6N1K2;A2WNR2;Q9LGU6;A0A0E0FKG0;A6N0P7	Q0DKY4;B7EKA4;A2Y053;A0A0E0H922;Q1H9D3;Q1H9D0;Q1H9C8;Q1H9C4;Q1H9C0;Q1H9B9;Q1H9B6;Q1H9B3;Q1H9A4;Q1H9A2;Q1H997;Q1H994;Q1H993;Q1H992;Q1H990;Q1H989;Q1H981;Q1H977;Q1H970;Q1H969;Q1H968;Q1H964;Q1H961;Q1H960	S-adenosylmethionine synthase 1;S-adenosylmethionine synthase;S-adenosylmethionine synthase 1;S-adenosylmethionine synthase;S-adenosylmethionine synthase (Fragment);S-adenosylmethionine synthase (Fragment);S-adenosylmethionine synthase (Fragment);S-adenosy	METK3 Os01g0293000 LOC_Os01g18860 OsJ_001358 P0706B05.41;OsI_01493;OsJ_17029;SAM1 SAMS Os05g0135700 LOC_Os05g04510 OsJ_016271 P0519E07.14;SAM1 SAMS OsI_017696;sams	133.17	1.37086e-08	up	8.05713	1	129640000	143080000	182860000	0	0	0	7.98474	8.03663	8.15001	1	1	1
1014	B8AXV2;P42211;A0A0E0H931;B9FMC0	B8AXV2;P42211;A0A0E0H931;B9FMC0	Uncharacterized protein;Aspartic proteinase;Uncharacterized protein;Uncharacterized protein	OsI_18377;OsJ_17039;RAP Os05g0137400 LOC_Os05g04630 OJ1127_B08.13	132.109	1.35169e-11	up	8.04558	1	139840000	144240000	156570000	0	0	0	8.03267	8.04212	8.06196	1	1	1
1015	A0A0E0H9A3;A0A0E0H9A2;B9FME2;Q60EX6;A0A0E0H9A1	A0A0E0H9A3;A0A0E0H9A2;B9FME2;Q60EX6;A0A0E0H9A1	Serine/threonine-protein phosphatase;Serine/threonine-protein phosphatase;Serine/threonine-protein phosphatase;Serine/threonine-protein phosphatase BSL1 homolog;Serine/threonine-protein phosphatase	BSL1 Os05g0144400 LOC_Os05g05240 OJ1607_F09.10;OsJ_17091	1.59985	0.780531	up	3.95263	3.2747	6928700	7143600	10169000	47031000	0	0	3.93372	3.91809	4.00609	7.82409	1	1
1016	Q6ASS1;B8AXX6;A0A0E0H9B2;A0A0E0H9B3	Q6ASS1;B8AXX6;A0A0E0H9B2;A0A0E0H9B3	Os05g0145600 protein;Uncharacterized protein;Uncharacterized protein;Uncharacterized protein	Os05g0145600 OsJ_17098 OSJNBa0077J22.1 OSJNBb0015A05.7 OSNPB_050145600;OsI_18438	3.78336	0.451554	up	7.52446	5.60479	59580000	40044000	60392000	0	55431000	63669000	7.60765	7.37573	7.58999	1	7.86001	7.95437
1017	Q5ZBN0;H9CWR9;B8ABJ9;A0A0E0H9B6;B9EY00	Q5ZBN0;H9CWR9;B8ABJ9;A0A0E0H9B6;B9EY00	Os01g0607900 protein;Receptor-like protein kinase 1;Uncharacterized protein;Uncharacterized protein;Uncharacterized protein	Os01g0607900 OSJNBa0090K04.21 OSNPB_010607900 P0704D04.29;OsI_02797;OsJ_02553	3.73375	0.116551	up	2.90063	1	4364900	0	8147900	0	0	0	3.75667	1	3.94521	1	1	1
1019	Q65XE3;Q0DKQ0;B9FHD6;B8AY43;A0A0E0H9F7	Q65XE3;Q0DKQ0;B9FHD6;B8AY43;A0A0E0H9F7	Putative cullin 1;Os05g0149600 protein;Uncharacterized protein;Uncharacterized protein;Uncharacterized protein	OJ1504_G04.11;Os05g0149600;OsI_18469;OsJ_17132	3.7049	0.116202	up	2.88944	1	0	3969700	5687500	0	0	0	1	3.7925	3.87581	1	1	1
1021	Q9FRA7;A2Y0H2;A0A0E0H9Q1;A0A0E0H9Q0	Q9FRA7;A2Y0H2;A0A0E0H9Q1;A0A0E0H9Q0	REF/SRPP-like protein Os05g0151300/LOC_Os05g05940;REF/SRPP-like protein OsI_017815;Uncharacterized protein;Uncharacterized protein	Os05g0151300 LOC_Os05g05940 OsJ_016392 OsJ_17148 OSJNBa0072C16.2 P0001A07.13;OsI_017815	2.99365	0.134829	up	2.58191	1	4142500	6378100	0	0	0	0	2.85325	3.89247	1	1	1	1
1023	B9FHE7;A0A0E0H9R7;Q65XP3;A2Y0I5;A0A0P0WI13	B9FHE7;A0A0E0H9R7;Q65XP3;A2Y0I5;A0A0P0WI13	Uncharacterized protein;Uncharacterized protein;Os05g0153300 protein;Uncharacterized protein;Os05g0153300 protein	Os05g0153300 OSJNBa0072C16.18;Os05g0153300 OSNPB_050153300;OsI_18501;OsJ_17160	1.9181	0.373901	up	1.93968	1	4785000	0	0	0	0	0	3.81904	1	1	1	1	1
1024	B8AY67;B9FMJ3;A0A0E0H9T0;A0A0E0H9T1	B8AY67;B9FMJ3;A0A0E0H9T0;A0A0E0H9T1	Kinesin-like protein;Kinesin-like protein KIN-13A;Uncharacterized protein;Uncharacterized protein	KIN13A SRS3 Os05g0154700 LOC_Os05g06280 OsJ_17169 OSJNBa0059G01.13 P0431G05.2;OsI_18511	2.07405	0.373901	up	2.05245	1	19768000	0	0	0	0	0	4.15736	1	1	1	1	1
1025	Q5WMY3;A2Y0K0;A0A0E0H9T4	Q5WMY3;A2Y0K0;A0A0E0H9T4	Cytoplasmic ribosomal protein L18;60S ribosomal protein l18;Uncharacterized protein	Os05g0155100 OsJ_17172 OSNPB_050155100 P0431G05.5;OsI_18515	179.546	1.4846e-08	up	8.48821	1	451470000	304180000	390920000	0	0	0	8.56104	8.38553	8.51806	1	1	1
1026	B8AY77;Q9SLX0;Q0DKL7;A0A0E0H9T9;A0A0E0H9U1;A0A0E0H9U0;A0A0E0H9U2	B8AY77;Q9SLX0;Q0DKL7;A0A0E0H9T9;A0A0E0H9U1;A0A0E0H9U0;A0A0E0H9U2	Importin subunit alpha;Importin subunit alpha-1b;Importin subunit alpha;Importin subunit alpha;Importin subunit alpha;Importin subunit alpha;Importin subunit alpha	Os05g0155500 OsJ_17176;Os05g0155601 LOC_Os05g06350;OsI_18524	83.1322	8.88446e-09	up	7.37734	1	43903000	37721000	36414000	0	0	0	7.45635	7.33417	7.34149	1	1	1
1027	B9FHF3;A2Y0K9;A0A0E0H9V0	B9FHF3;A2Y0K9;A0A0E0H9V0	DnaJ protein ERDJ3B;Uncharacterized protein;Uncharacterized protein	ERDJ3B DJB6 Os05g0156500 LOC_Os05g06440 OsJ_17183 P0431G05.15 P0676G05.5;OsI_18531	9.16064	3.99283e-09	up	4.19545	1	22734000	29516000	22043000	0	0	0	4.18583	4.22711	4.17341	1	1	1
1028	A0A0E0H9V2;Q75M05;B9FMK1	A0A0E0H9V2;Q75M05;B9FMK1	Dihydrolipoyl dehydrogenase;Dihydrolipoyl dehydrogenase;Dihydrolipoyl dehydrogenase	OsJ_17184;P0431G05.17 P0676G05.7	20.2804	0.116122	up	5.34202	1	46168000	52888000	0	0	0	0	7.4899	7.53615	1	1	1	1
1029	Q75M01;B8AYD2;A0A0E0H9V9	Q75M01;B8AYD2;A0A0E0H9V9	Os05g0157200 protein;Uncharacterized protein;Uncharacterized protein	Os05g0157200 Os05g0157200 OsJ_17188 OSNPB_050157200 P0676G05.12;OsI_18538	87.0198	2.70555e-09	up	7.44327	1	45627000	46783000	39678000	0	0	0	7.48094	7.46419	7.38468	1	1	1
1031	A0A0P0WIL9;Q8W170;Q75IQ9;A2Y0Q8;A0A0E0HA21;Q0DKG9	A0A0P0WIL9;Q8W170;Q75IQ9;A2Y0Q8;A0A0E0HA21;Q0DKG9	Os05g0164100 protein (Fragment);Fructose-6-phosphate-2-kinase/fructose-2, 6-bisphosphatase;putative 6-phosphofructo-2-kinase;Uncharacterized protein;Uncharacterized protein;Os05g0164100 protein	Os05g0164100 Os05g0164100 OSNPB_050164100;Os05g0164100 OsJ_17237 OSJNBa0027N19.4 OSJNBb0099P06.14 OSNPB_050164100;Os05g0164100 OSNPB_050164100;OsI_18583	8.80986	0.156005	up	4.13912	1	0	33583000	23126000	0	0	0	1	7.23274	4.18462	1	1	1
1034	Q6AT26;A2Y0X2;A0A0E0HA89;A0A0P0WIK3;A0A0P0WII5;A6N1D0;A0A0P0WIK8	Q6AT26;A2Y0X2;A0A0E0HA89	Probable cellulose synthase A catalytic subunit 1 [UDP-forming];Probable cellulose synthase A catalytic subunit 1 [UDP-forming];Cellulose synthase	CESA1 Os05g0176100 LOC_Os05g08370 OsJ_016545 OsJ_17310 OSJNBa0029B02.3 P0617A08.14;CESA1 OsI_017965;Os05g0176100 OSNPB_050176100	102.713	3.37632e-10	up	7.68247	1	70075000	69089000	75130000	0	0	0	7.67089	7.65818	7.71833	1	1	1
1035	Q6AT24;A0A0E0HA92;B8AYM0	Q6AT24;A0A0E0HA92;B8AYM0	Os05g0176500 protein;Uncharacterized protein;Uncharacterized protein	Os05g0176500 Os05g0176500 OsJ_17313 OSJNBa0029B02.5 OSNPB_050176500;OsI_18653	1.92543	0.373901	up	1.94518	1	4975500	0	0	0	0	0	3.83555	1	1	1	1	1
1038	A0A0E0HAP7;C7J4Q1;Q6Z3C0;Q0DK58;A2Y182;A2YL00;A0A0E0I066;Q60DS7;A0A0P0WJ51;B9FMW4	A0A0E0HAP7;C7J4Q1;Q6Z3C0;Q0DK58;A2Y182	Uncharacterized protein;Os07g0460100 protein;Acid phosphatase-like;Os05g0192100 protein (Fragment);Uncharacterized protein	B1140B01.11;Os05g0191500 OSNPB_050191500;Os05g0192100;Os07g0460100;OsI_18762;OsI_25890;OsJ_17413;OSJNBa0040K22.135 P0038F09.7	1.16624	0.00292127	up	7.47292	7.25105	42275000	46188000	53016000	9402700	11564000	8082800	7.43314	7.45764	7.52797	7.23274	7.2892	7.23122
1044	Q0DJU1;B8AZD7;A0A0E0HB86;Q6AVB7;A0A0P0WJQ6	Q0DJU1;B8AZD7;A0A0E0HB86;Q6AVB7;A0A0P0WJQ6	Eukaryotic translation initiation factor 3 subunit L;Eukaryotic translation initiation factor 3 subunit L;Eukaryotic translation initiation factor 3 subunit L;Eukaryotic translation initiation factor 3 subunit L;Os05g0227700 protein (Fragment)	OJ1212_C10.13;Os05g0227700 Os05g0227700 OsJ_17615 OSNPB_050227700;Os05g0227700 OSNPB_050227700;OsI_18958	1.64028	0.783708	up	4.14607	3.43213	17743000	19176000	21909000	0	150240000	0	4.13047	4.136	4.17174	1	8.29638	1
1045	Q94DR2;A0A0E0HBD0;B8A7Y1;B9EWQ2	Q94DR2;A0A0E0HBD0;B8A7Y1;B9EWQ2	Dephospho-CoA kinase;Uncharacterized protein;Uncharacterized protein;Uncharacterized protein	Os01g0360600 P0460H02.10;OsI_01896;OsJ_01747	97.41	4.50242e-08	up	7.606	1	64519000	73335000	48660000	0	0	0	7.64459	7.68783	7.48557	1	1	1
1046	Q6ATD9;Q8H8S1;A2XJ89;A0A0P0WK98;A0A0E0HBS0;A0A0P0W0L2;B9FNL6;B8AW24	Q6ATD9;Q8H8S1;A2XJ89;A0A0P0WK98;A0A0E0HBS0;A0A0P0W0L2;B9FNL6;B8AW24	Ribosomal protein L15;Ribosomal protein L15;Ribosomal protein L15;Ribosomal protein L15 (Fragment);Ribosomal protein L15;Ribosomal protein L15 (Fragment);Ribosomal protein L15;Ribosomal protein L15	Os03g0598800 OSNPB_030598800;Os05g0274900 OSNPB_050274900;OsI_12513;OsI_19264;OsJ_17876;OSJNBa0018H09.6;OSJNBa0087M10.1 LOC_Os03g40180 Os03g0598800 Os05g0274700 OJ1523_A02.2 OsJ_11650 OSNPB_030598800	102.511	1.1012e-08	up	7.67964	1	68221000	85998000	62637000	0	0	0	7.66	7.76326	7.61566	1	1	1
1047	A0A0P0XIM9;Q0J3D9;A2YYM7;A0A0E0HBV8;A0A0P0XJM4;Q6K3G4	A0A0P0XIM9;Q0J3D9;A2YYM7;A0A0E0HBV8;A0A0P0XJM4;Q6K3G4	Os09g0127800 protein (Fragment);Coatomer subunit alpha-3;Coatomer subunit alpha;Uncharacterized protein;Os09g0127800 protein (Fragment);Alpha-cop protein-like	OJ1352_A10.31-1;Os09g0127800 LOC_Os09g04110 OsJ_027299;Os09g0127800 OSNPB_090127800;OsI_30447	20.9882	0.116558	up	5.39151	1	92279000	39688000	0	0	0	0	7.80682	7.3677	1	1	1	1
1050	Q0DJF5;A2Y2S7;A0A0E0HC03	Q0DJF5;A2Y2S7;A0A0E0HC03	Os05g0292800 protein;Uncharacterized protein;Uncharacterized protein	Os05g0292800 Os05g0292800 OsJ_17921 OSNPB_050292800;OsI_19311	122.215	3.16343e-07	up	7.93328	1	165810000	85720000	109510000	0	0	0	8.12448	7.76205	7.91332	1	1	1
1051	Q08480;A2ZDQ6;A0A0E0HC10	Q08480;A2ZDQ6;A0A0E0HC10	Adenylate kinase 4;Uncharacterized protein;Uncharacterized protein	Os11g0312220;ADK-B Os11g0312400 LOC_Os11g20790;OsI_35920	1.0893	0.587401	up	8.32965	8.20625	688920000	142930000	215220000	134680000	117900000	124280000	8.73351	8.03377	8.22168	8.23051	8.19101	8.19722
1052	B9FK36;A2Y2U1;A0A0E0HC32	B9FK36;A2Y2U1;A0A0E0HC32	Acetyl-CoA carboxylase 2;Uncharacterized protein;Uncharacterized protein	ACC2 Os05g0295300 LOC_Os05g22940 OsJ_17935;OsI_19330	1.19343	0.0827103	up	8.11488	7.85977	115400000	220800000	200010000	45608000	48428000	64881000	7.91757	8.23162	8.19547	7.80682	7.81414	7.95835
1053	Q0DJC5;B8AWB3;A0A0E0HC62;A0A0P0WKC1	Q0DJC5;B8AWB3;A0A0E0HC62;A0A0P0WKC1	Dolichyl-diphosphooligosaccharide--protein glycosyltransferase subunit 1A;Dolichyl-diphosphooligosaccharide--protein glycosyltransferase subunit 1;Dolichyl-diphosphooligosaccharide--protein glycosyltransferase subunit 1;Dolichyl-diphosphooligosaccharide--p	Os05g0301500 OSNPB_050301500;OsI_19365;OST1A RPN1A Os05g0301500 LOC_Os05g23600 OsJ_17960	42.5978	0.00863014	up	6.41271	1	48843000	55912000	20980000	0	0	0	7.51831	7.56092	4.15889	1	1	1
1054	Q0DJC3;A0A0E0HC64;B9FNR2;B8AWB5	Q0DJC3;A0A0E0HC64;B9FNR2;B8AWB5	Os05g0301700 protein;Uncharacterized protein;Uncharacterized protein;Uncharacterized protein	Os05g0301700 Os05g0301700 OSNPB_050301700;OsI_19367;OsJ_17962	1.56134	6.52808e-07	up	8.63717	7.99439	592980000	495090000	507770000	73398000	76077000	70688000	8.65594	8.6165	8.63908	7.99307	7.9991	7.99099
1055	Q0DJC0;A2Y2Y3;A0A0E0HC71	Q0DJC0;A2Y2Y3;A0A0E0HC71	Os05g0302700 protein;Uncharacterized protein;Uncharacterized protein	Os05g0302700 Os05g0302700 OsJ_17966 OSNPB_050302700;OsI_19373	154.417	1.51862e-09	up	8.27069	1	205660000	250540000	251120000	0	0	0	8.21303	8.29402	8.30501	1	1	1
1058	Q688K0;Q0DJB7;O22471;O22470;A2Y4R1;A2Y2Z1;A0A0E0HEJ9;A0A0E0HC97;B9F8G3;Q8LIL4;B8B503;A0A0E0FW74	Q688K0;Q0DJB7;O22471;O22470;A2Y4R1;A2Y2Z1;A0A0E0HEJ9;A0A0E0HC97;B9F8G3;Q8LIL4;B8B503;A0A0E0FW74	Guanosine nucleotide diphosphate dissociation inhibitor;Guanosine nucleotide diphosphate dissociation inhibitor;Guanosine nucleotide diphosphate dissociation inhibitor;Guanosine nucleotide diphosphate dissociation inhibitor;Guanosine nucleotide diphosphate	OJ1001_C01.113 Os07g0271000 OSNPB_070271000;Os05g0304400 Os05g0304400 OsJ_17976 OSNPB_050304400;Os05g0418000 Os05g0418000 OsJ_18568 OSNPB_050418000 P0426G01.1 P0579A05.9;OsGDI1;OsGDI2;OsI_19382;OsI_19989;OsI_25604;OsJ_10849	1.96332	0.373901	up	1.97329	1	6582100	0	0	0	0	0	3.91988	1	1	1	1	1
1059	A0A0P0WKN7;A0A0E0HC99;B9FNR7;B8AWC1;Q0DJB6	A0A0P0WKN7;A0A0E0HC99;B9FNR7;B8AWC1;Q0DJB6	Lipoxygenase (Fragment);Lipoxygenase;Lipoxygenase;Lipoxygenase;Lipoxygenase	Os05g0304600 Os05g0304600 OSNPB_050304600;Os05g0304600 OSNPB_050304600;OsI_19383;OsJ_17977	2.00541	0.373901	up	2.00389	1	10333000	0	0	0	0	0	4.01168	1	1	1	1	1
1062	Q5WMV3;A2Y334;A0A0E0HCG0;A0A0E0HCF9;A0A0P0WKK9;Q0DJ93	Q5WMV3;A2Y334;A0A0E0HCG0;A0A0E0HCF9;A0A0P0WKK9	Uncharacterized protein;Uncharacterized protein;Uncharacterized protein;Uncharacterized protein;Os05g0313500 protein (Fragment)	OJ1308_D01.1 OsJ_18017;Os05g0313500;Os05g0313500 OSNPB_050313500;OsI_19421	98.7852	3.70455e-09	up	7.62622	1	62066000	73066000	58297000	0	0	0	7.62568	7.68371	7.56929	1	1	1
1064	A0A0E0HCN8;Q5W6U2;A0A0P0WKQ1;B8AWM3;B9FNW3;A0A0P0WKU1	A0A0E0HCN8;Q5W6U2;A0A0P0WKQ1;B8AWM3;B9FNW3;A0A0P0WKU1	Uncharacterized protein;Os05g0323800 protein;Os05g0323800 protein (Fragment);Uncharacterized protein;Uncharacterized protein;Os05g0323800 protein (Fragment)	Os05g0323800 OSNPB_050323800;Os05g0323800 P0018A03.7;OsI_19471;OsJ_18066	4.36537	0.524313	up	5.29407	3.16797	0	48683000	40391000	0	20708000	0	1	7.4899	7.39233	1	7.50391	1
1065	Q43803;Q43008;B8AWM4;A0A0E0HCN9	Q43803;Q43008;B8AWM4;A0A0E0HCN9	Superoxide dismutase;Superoxide dismutase [Mn], mitochondrial;Superoxide dismutase;Superoxide dismutase	OsI_19472;rmsod2;SODA RMSOD1 SODAOS1 Os05g0323900 LOC_Os05g25850 OsJ_18067 P0018A03	30.4386	0.105905	up	8.29575	3.36792	247700000	234140000	276750000	0	0	97394000	8.28154	8.26528	8.34042	1	1	8.10376
1066	Q8LJU5;B8AX04;A0A0E0HD00	Q8LJU5;B8AX04;A0A0E0HD00	40S ribosomal protein S7;40S ribosomal protein S7;40S ribosomal protein S7	OsI_19547;RPS7 Os05g0346300 LOC_Os05g27940 B1036C05.13 B1164G01.3 OsJ_18157	35.0368	0.116117	up	6.1308	1	0	647760000	580770000	0	0	0	1	8.70751	8.6849	1	1	1
1068	B8AX06;A0A0E0HD35;Q5W6H5;A4GUA1;A0A0P0WL08;A0A0E0HD36	B8AX06;A0A0E0HD35;Q5W6H5;A4GUA1;A0A0P0WL08;A0A0E0HD36	Uncharacterized protein;Uncharacterized protein;Chlorophyll synthase, chloroplastic;Chlorophyll synthase;Os05g0349700 protein (Fragment);Uncharacterized protein	CHLG Os05g0349700 LOC_Os05g28200 OsJ_18166 OSJNBa0077J17.3;Os05g0349700 OSNPB_050349700;OsI_19554	3.67858	0.116134	up	2.87915	1	4585100	0	4338600	0	0	0	3.80021	1	3.83724	1	1	1
1070	B9FP20;A0A0E0HD43;Q5W6H1;A2Y3I6;A6N1I3;O22523	B9FP20;A0A0E0HD43;Q5W6H1;A2Y3I6;A6N1I3;O22523	Uncharacterized protein;Uncharacterized protein;Os05g0350500 protein;Uncharacterized protein;Proliferation-associated protein 2g4 (Fragment);DNA-binding protein GBP16	Os05g0350500 Os05g0350500 OSJNBa0077J17.8 OSNPB_050350500;OsI_19569;OsJ_18175;Rgbp16	103.958	6.68198e-08	up	7.69985	1	95230000	72114000	60832000	0	0	0	7.82901	7.67656	7.59399	1	1	1
1071	A0A0P0WL85;Q8GTC5;Q9ZWR5;A2Y3K8;A0A0E0HD60	A0A0P0WL85;Q8GTC5;Q9ZWR5;A2Y3K8;A0A0E0HD60	Os05g0353400 protein (Fragment);Importin beta-like protein (Fragment);Importin beta 1;Uncharacterized protein;Uncharacterized protein	Impb2;Os05g0353400 Os05g0353400 OJ1320_D10.8 OsJ_18185 OSNPB_050353400;Os05g0353400 OSNPB_050353400;OsI_19590	2.02605	0.373901	up	2.01867	1	0	13309000	0	0	0	0	1	4.05601	1	1	1	1
1072	B9G2P4;Q69TB1;A0A0E0IHL7;A0A0P0XK63;Q0DIV0;A2Y3Q5;B9FP56;B8AXD8;A0A0P0WLC1;A0A0E0HDC9;A0A0E0HDC8	B9G2P4;Q69TB1;A0A0E0IHL7;A0A0P0XK63;Q0DIV0;A2Y3Q5;B9FP56;B8AXD8;A0A0P0WLC1;A0A0E0HDC9;A0A0E0HDC8	Ferrochelatase;Ferrochelatase-1, chloroplastic;Ferrochelatase;Ferrochelatase (Fragment);Ferrochelatase-2, chloroplastic;Ferrochelatase-2, chloroplastic;Ferrochelatase;Ferrochelatase;Ferrochelatase (Fragment);Ferrochelatase;Ferrochelatase	HEMH OsI_018948;Os05g0361200 LOC_Os05g29760 P0530H10.9 P0692D12.2;Os05g0361200 OSNPB_050361200;Os09g0297000 LOC_Os09g12560 P0592C05.24;Os09g0297000 OSNPB_090297000;OsI_19638;OsJ_18231;OsJ_28745	132.227	4.82958e-08	up	8.04687	1	128230000	197990000	131510000	0	0	0	7.97438	8.18022	7.98601	1	1	1
1073	A0A0E0HDG3;B9FP77;Q6L590	A0A0E0HDG3;B9FP77;Q6L590	Uncharacterized protein;Uncharacterized protein;Heat shock 70 kDa protein BIP3	BIP3 Os05g0367800 LOC_Os05g30480 OJ1393_A07.8;OsJ_18274	4.33379	0.116126	up	3.11563	1	22999000	21452000	0	0	0	0	4.18885	4.15804	1	1	1	1
1074	A0A0E0HDG9;A2Y3W4;Q6L588;Q0DIR7;B9FHI2	A0A0E0HDG9;A2Y3W4;Q6L588;Q0DIR7;B9FHI2	40S ribosomal protein S4;40S ribosomal protein S4;40S ribosomal protein S4;40S ribosomal protein S4;Uncharacterized protein	OJ1393_A07.10;Os05g0368300 Os05g0368300 OSNPB_050368300;OsI_19685;OsJ_18278	40.5318	0.00899102	up	6.34098	1	14879000	49338000	43588000	0	0	0	4.091	7.4977	7.43424	1	1	1
1075	Q9ATR3;Q75K72;Q5UAW3;A2Y402;A0A0E0HDN0	Q9ATR3;Q75K72;Q5UAW3;A2Y402;A0A0E0HDN0	Glucanase;putative beta-1,3-glucanase;Endo-1,3;1,4-beta-glucanase;Uncharacterized protein;Uncharacterized protein	GLU;Os05g0375400 OJ1005_E12.10 OsJ_18327 OSNPB_050375400;OsI_19732	4.8076	0.373901	up	3.26532	1	0	0	87135000	0	0	0	1	1	7.79595	1	1	1
1076	B8AXS2;B7E4J4;Q6L4C6;A0A0E0HDS0;B9FPC4;A2XZG1;Q0DIK2	B8AXS2;B7E4J4;Q6L4C6;A0A0E0HDS0;B9FPC4;A2XZG1	Uncharacterized protein;Os05g0382600 protein;Uncharacterized protein OSJNBa0088M05.15;Uncharacterized protein;Uncharacterized protein;Uncharacterized protein	Os05g0382600 Os05g0382600 OSNPB_050382600;Os05g0382600 OSNPB_050382600;OsI_18112;OsI_19777;OsJ_18373;OSJNBa0088M05.15	101.921	6.98033e-08	up	7.6713	1	90130000	70615000	57004000	0	0	0	7.79394	7.6659	7.55407	1	1	1
1077	Q60E54;B8AY26;A0A0E0HDU4	Q60E54;B8AY26;A0A0E0HDU4	U6 snRNA-associated Sm-like protein LSm5;U6 snRNA-associated Sm-like protein LSm5;U6 snRNA-associated Sm-like protein LSm5	LSM5;LSM5 Os05g0389300 OsJ_05491 OSJNBa0073E05.22 OSNPB_050389300;LSM5 OsI_19819	1.97098	0.373901	up	1.97891	1	7038200	0	0	0	0	0	3.93674	1	1	1	1	1
1078	A0A0P0VMQ0;A0A0E0HDU5;Q6H6W9;Q0DZ46;B8AG13	A0A0P0VMQ0;A0A0E0HDU5;Q6H6W9;Q0DZ46;B8AG13	Os02g0647900 protein (Fragment);Aldehyde dehydrogenase;Aldehyde dehydrogenase;Aldehyde dehydrogenase;Aldehyde dehydrogenase	Os02g0647900 Os02g0647900 OsJ_07720 OSNPB_020647900;Os02g0647900 OSNPB_020647900;OsI_08280;P0519A12.30	82.1663	1.68752e-08	up	7.36047	1	37105000	35381000	44040000	0	0	0	7.35433	7.28349	7.44361	1	1	1
1079	A0A0E0HDV8;B9FI28;A2Y499;Q6I5X7;A2Y497	A0A0E0HDV8;B9FI28;A2Y499;Q6I5X7	Uncharacterized protein;Uncharacterized protein;Uncharacterized protein;Os05g0390100 protein	Os05g0390100 Os05g0390100 OJ1562_H01.8 OSNPB_050390100;OsI_19823;OsI_19825;OsJ_18414	90.796	8.71675e-08	up	7.50456	1	59234000	39483000	55583000	0	0	0	7.60481	7.3663	7.54256	1	1	1
1080	A6MZH6;Q60ES9;A0A0P0WLY8;B8AXZ4;A0A0E0HDX5	A6MZH6;Q60ES9;A0A0P0WLY8;B8AXZ4;A0A0E0HDX5	Uncharacterized protein (Fragment);Os05g0391200 protein;Os05g0391200 protein (Fragment);Uncharacterized protein;Uncharacterized protein	Os05g0391200 OJ1764_D01.2 OsJ_18425;Os05g0391200 OSNPB_050391200;OsI_19835	18.3247	0.015531	up	5.19572	1	16163000	27516000	32990000	0	0	0	4.10765	4.21046	7.26904	1	1	1
1082	Q60ER7;A2Y4C0;A0A0E0HDY8;A2Y4B7	Q60ER7;A2Y4C0;A0A0E0HDY8	Os05g0392700 protein;Uncharacterized protein;Uncharacterized protein	Os05g0392700 Os05g0392700 OJ1764_D01.15 OsJ_18435 OSNPB_050392700;OsI_19843;OsI_19846	106.613	1.9994e-07	up	7.73624	1	76299000	116000000	61066000	0	0	0	7.7032	7.90783	7.59769	1	1	1
1083	Q75HW4;B8AY06;A0A0E0HE02	Q75HW4;B8AY06;A0A0E0HE02	Os05g0395000 protein;Uncharacterized protein;Uncharacterized protein	Os05g0395000 Os05g0395000 OsJ_18446 OSJNBa0014C03.11 OSJNBb0092G21.1 OSNPB_050395000;OsI_19859	100.16	1.50986e-09	up	7.64617	1	64713000	73645000	61075000	0	0	0	7.64683	7.69168	7.59999	1	1	1
1086	Q0DIC9;A0A0E0HE62;B8AY19	Q0DIC9;A0A0E0HE62;B8AY19	Os05g0400400 protein;Uncharacterized protein;Uncharacterized protein	Os05g0400400 Os05g0400400 OSNPB_050400400;OsI_19890	1.18195	0.00523546	up	8.57313	8.33196	403720000	548170000	429270000	181630000	165940000	156010000	8.52407	8.65149	8.54381	8.35747	8.34202	8.29638
1090	Q6ATY1;B9FIC9;A0A0E0HE74;A0A0E0HE75;A0A0E0HE73;B8AY31	Q6ATY1;B9FIC9;A0A0E0HE74;A0A0E0HE75;A0A0E0HE73;B8AY31	Uncharacterized protein;Uncharacterized protein;Uncharacterized protein;Uncharacterized protein;Uncharacterized protein;Uncharacterized protein	OsI_19903;OsJ_18483;OSJNBa0035J16.12	2.01868	0.373901	up	2.01341	1	0	12283000	0	0	0	0	1	4.04023	1	1	1	1
1092	P17784;A0A0E0HE79;B8AY35;Q10A30;A2XUB6;A0A0E0IQ08;A6N1U4;A6MZG7	P17784;A0A0E0HE79;B8AY35;Q10A30;A2XUB6;A0A0E0IQ08	Fructose-bisphosphate aldolase 1, cytoplasmic;Fructose-bisphosphate aldolase;Fructose-bisphosphate aldolase;Fructose-bisphosphate aldolase 2, cytoplasmic;Fructose-bisphosphate aldolase;Fructose-bisphosphate aldolase	FBA1 FBA Os05g0402700 LOC_Os05g33380 OSJNBa0035J16.18 OSJNBb0006J12.6;FBA2 Os10g0163340 LOC_Os10g08022 OsJ_30817;OsI_16195;OsI_19907	101.201	6.15816e-09	up	7.66108	1	59000000	68823000	77114000	0	0	0	7.59769	7.65739	7.72815	1	1	1
1093	A0A0E0HE81;A0A0E0HE80;B8AY36;Q6AUL4;B9FID1;A0A0P0WM50;Q8S3X3	A0A0E0HE81;A0A0E0HE80;B8AY36;Q6AUL4;B9FID1;A0A0P0WM50	Cation-transporting ATPase;Uncharacterized protein;Uncharacterized protein;Uncharacterized protein OSJNBb0006J12.7;Uncharacterized protein;Cation-transporting ATPase (Fragment)	Os05g0402800 OSNPB_050402800;OsI_19908;OsJ_18487;OSJNBb0006J12.7	103.377	4.2247e-07	up	7.69178	1	57383000	57702000	108680000	0	0	0	7.58522	7.58024	7.90987	1	1	1
1095	A0A0E0HED1;Q7F4T1;Q6Z1U4;Q6ENJ1;P0C437;P0C436;P0C435;J7EYM0;A0A1W5HNT2;A0A1W5HKR8;A0A0N9E0N3;A0A0N9E0H2;A0A0K0LRV4;A0A0K0LK47;E9KIM8;Q7XM78;Q339H5;Q108X8	A0A0E0HED1;Q7F4T1;Q6Z1U4;Q6ENJ1;P0C437;P0C436;P0C435;J7EYM0;A0A1W5HNT2;A0A1W5HKR8;A0A0N9E0N3;A0A0N9E0H2;A0A0K0LRV4;A0A0K0LK47;E9KIM8;Q7XM78;Q339H5;Q108X8	Uncharacterized protein;Photosystem II D2 protein;Photosystem II D2 protein;Photosystem II D2 protein;Photosystem II D2 protein;Photosystem II D2 protein;Photosystem II D2 protein;Photosystem II D2 protein;Photosystem II D2 protein;Photosystem II D2 protei	LOC_Os10g21210;LOC_Os10g41689;OSJNBa0022A24.62;OSJNBa0079C19.2;psbD;psbD 9311016;psbD LOC_Osp1g00170 Nip018;psbD P0557A01.60;psbD PA018	17.0435	0.0207092	up	5.09115	1	33845000	13417000	6865800	0	0	0	7.29693	4.05883	3.91769	1	1	1
1096	Q60DW3;A2Y4R8;A0A0E0HEK5	Q60DW3;A2Y4R8;A0A0E0HEK5	PHD finger protein ALFIN-LIKE 5;PHD finger protein ALFIN-LIKE 5;Uncharacterized protein	Os05g0419100 LOC_Os05g34640 OsJ_18575 P0426G01.9;OsI_19996	1.20876	0.373901	up	1.27353	1	838460	0	0	0	0	0	1.82058	1	1	1	1	1
1098	B9FPQ9;B8AYI6;Q5TKJ2;A0A0E0HEV8	B9FPQ9;B8AYI6;Q5TKJ2;A0A0E0HEV8	Uncharacterized protein;Uncharacterized protein;Os05g0429400 protein;Uncharacterized protein	Os05g0429400 OSJNBb0048I21.5 OSNPB_050429400;OsI_20058;OsJ_18629	1.34862	0.12469	up	8.06395	7.63247	62013000	222680000	269130000	27230000	33690000	26184000	7.62455	8.23808	8.32922	7.59513	7.67955	7.62273
1099	Q6I5U8;B9FIZ2;B8AYJ5;A0A0E0HEY2;A0A0P0WMY1	Q6I5U8;B9FIZ2;B8AYJ5;A0A0E0HEY2;A0A0P0WMY1	Os05g0432400 protein;Uncharacterized protein;Uncharacterized protein;Uncharacterized protein;Os05g0432400 protein	Os05g0432400 OJ1301_G07.5 OJ1378_A04.10 OSNPB_050432400;Os05g0432400 OSNPB_050432400;OsI_20075;OsJ_18647	119.526	6.76908e-10	up	7.90118	1	112330000	105270000	115610000	0	0	0	7.90606	7.86001	7.93746	1	1	1
1101	Q75HX0;A2Y534;A0A0E0HF33	Q75HX0;A2Y534;A0A0E0HF33	Actin;Uncharacterized protein;Uncharacterized protein	Os05g0438800 OsJ_18684 OSJNBb0042J17.12 OSNPB_050438800;OsI_20107	2.00051	0.373901	up	2.00037	1	0	0	9984300	0	0	0	1	1	4.0011	1	1	1
1102	Q6F2N3;B9FPU5;A2Y560;A0A0E0HF66;Q0DHT6	Q6F2N3;B9FPU5;A2Y560;A0A0E0HF66;Q0DHT6	Uncharacterized protein;Os05g0443300 protein;Uncharacterized protein;Uncharacterized protein;Os05g0443300 protein	B1110B01.16 OSJNBa0020H14.12;Os05g0443300;Os05g0443300 OsJ_18710 OSNPB_050443300;OsI_20132	7.5214	7.25828e-08	up	3.911	1	5553100	5999400	9075200	0	0	0	3.87716	3.88389	3.97195	1	1	1
1104	A0A0P0WNC7;O04226;B9FKJ9;B8AYT8;A0A0E0HFG3	A0A0P0WNC7;O04226;B9FKJ9;B8AYT8;A0A0E0HFG3	Os05g0455500 protein (Fragment);Delta-1-pyrroline-5-carboxylate synthase 1;Delta-1-pyrroline-5-carboxylate synthase;Delta-1-pyrroline-5-carboxylate synthase;Delta-1-pyrroline-5-carboxylate synthase	Os05g0455500 OSNPB_050455500;OsI_20190;OsJ_18779;P5CS1 P5CS Os05g0455500 LOC_Os05g38150 OJ1651_D06.9	7.62656	4.41367e-10	up	3.93103	1	6803800	8065900	6799300	0	0	0	3.93002	3.94638	3.91669	1	1	1
1106	A6N154;Q10HD0;I3QD65;A2XJ35;A0A0E0HFQ2;Q10HC8;Q10HC9;A0A0P0W0H3	A6N154;Q10HD0;I3QD65;A2XJ35;A0A0E0HFQ2;Q10HC8;Q10HC9	Chlorophyll a-b binding protein, chloroplastic (Fragment);Chlorophyll a-b binding protein, chloroplastic;Chlorophyll a-b binding protein, chloroplastic;Chlorophyll a-b binding protein, chloroplastic;Chlorophyll a-b binding protein, chloroplastic;Chlorophyl	LOC_Os03g39610;Os03g0592500 OSNPB_030592500;OsI_012078;RCABP89 Os03g0592500 LOC_Os03g39610 OsJ_011145 OSJNBb0056O10.8	1.14311	0.374301	up	9.68723	9.49426	5240800000	6016800000	6666400000	4532300000	3141500000	1017200000	9.57825	9.71078	9.77266	9.72717	9.62554	9.13009
1110	Q0DHB7;A2Y5R6;A0A0E0HG09	Q0DHB7;A2Y5R6;A0A0E0HG09	Expansin-A4;Expansin-A4;Expansin	EXPA4 EXP4 Os05g0477600 LOC_Os05g39990 OsJ_018161 OsJ_18926 OSJNBa0018K15.5;EXPA4 EXP4 OsI_019659	5.16682	0.373901	up	3.36928	1	0	0	168390000	0	0	0	1	1	8.10783	1	1	1
1111	Q6F322;A2Y605;A0A0E0HG74;A0A0E0HG73	Q6F322;A2Y605;A0A0E0HG74;A0A0E0HG73	Os05g0490700 protein;Uncharacterized protein;Uncharacterized protein;Uncharacterized protein	Os05g0490700 OsJ_19021 OSJNBa0088I06.5 OSNPB_050490700;OsI_20427	2.03167	0.373901	up	2.02267	1	0	0	13444000	0	0	0	1	1	4.068	1	1	1
1113	Q65X81;Q0DH37;A2Y626;A0A0E0HGA5	Q65X81;Q0DH37;A2Y626;A0A0E0HGA5	Putative cytochrome P450;Os05g0494000 protein;Uncharacterized protein;Uncharacterized protein	OJ1579_G03.1 OsJ_19041;Os05g0494000 Os05g0494000 OSNPB_050494000;OsI_20449	117.418	2.19284e-07	up	7.87551	1	144260000	86483000	87340000	0	0	0	8.0648	7.76484	7.79689	1	1	1
1115	A0A0P0WP33;A0A0E0HGC6;A0A0E0HGC5;A2Y650;Q75K90;A0A0N7KL10;A0A0P0WNZ4;Q65X66;B8AAV9;A0A0E0FUH1;B8AZJ5;C7IXG8;B9ETR7	A0A0P0WP33;A0A0E0HGC6;A0A0E0HGC5;A2Y650;Q75K90;A0A0N7KL10	Phosphoglycerate kinase;Phosphoglycerate kinase;Phosphoglycerate kinase;Phosphoglycerate kinase;Phosphoglycerate kinase;Phosphoglycerate kinase (Fragment)	OJ1118_C04.1;Os01g0800266;Os05g0496200 OJ1579_G03.17 OsJ_19058;Os05g0496200 OSNPB_050496200;OsI_04088;OsI_20465;OsI_20474;OsJ_03768	1.03795	0.157947	up	8.50988	8.45614	452540000	356620000	388980000	229530000	239300000	216270000	8.56301	8.45796	8.50866	8.45796	8.46613	8.44433
1117	B9FKZ2;B8AZL1;Q6AUW8;B7FA11;A0A0E0HGF9;A0A0E0HGF8	B9FKZ2;B8AZL1;Q6AUW8;B7FA11;A0A0E0HGF9;A0A0E0HGF8	Uncharacterized protein;Uncharacterized protein;Uncharacterized protein;Os05g0499500 protein;Uncharacterized protein;Uncharacterized protein	OJ1057_B02.8;Os05g0499500 OSNPB_050499500;OsI_20492;OsJ_19083	19.8035	0.116152	up	5.30769	1	0	41073000	51914000	0	0	0	1	7.40084	7.52222	1	1	1
1119	A0A0E0HGI7;B8AZR2;Q60EA5	A0A0E0HGI7;B8AZR2;Q60EA5	Secretory carrier-associated membrane protein;Secretory carrier-associated membrane protein;Secretory carrier-associated membrane protein 3	OsI_20525;SCAMP3 Os05g0503000 LOC_Os05g42330 OsJ_19111 OSJNBa0017K09.16 OSJNBb0048K05.1	1.89129	0.373901	up	1.91937	1	4367200	0	0	0	0	0	3.75811	1	1	1	1	1
1120	Q60EI0;A0A0P0WP74;Q60EA3;A2Y698;A0A0E0HGI9	Q60EI0;A0A0P0WP74;Q60EA3;A2Y698;A0A0E0HGI9	Putative ferredoxin sulfite reductase;Os05g0503300 protein;Os05g0503300 protein;Uncharacterized protein;Uncharacterized protein	Os05g0503300 OsJ_19113 OSJNBa0017K09.18 OSJNBb0048K05.3 OSNPB_050503300;Os05g0503300 OSNPB_050503300;OsI_20527;OSJNBa0017K09.18	89.852	5.6519e-09	up	7.48948	1	45036000	55623000	43687000	0	0	0	7.47433	7.55793	7.43618	1	1	1
1122	Q53PC6;B8BJD1;Q53PC7;A0A0E0HGM7;A0A0P0XZK2;A0A0P0XZE2	Q53PC6;B8BJD1;Q53PC7;A0A0E0HGM7;A0A0P0XZK2	Coatomer subunit beta;Coatomer subunit beta;Coatomer subunit beta-1;Coatomer subunit beta;Os11g0174000 protein (Fragment)	LOC_Os11g07280;Os11g0174000 LOC_Os11g07280 OsJ_031814 OsJ_33144 OSJNBa0055G24 OSJNBb0063D09;Os11g0174000 OSNPB_110174000;OsI_35302	38.928	0.00693219	up	6.28274	1	26773000	40652000	31874000	0	0	0	4.21724	7.3932	7.23777	1	1	1
1126	Q2KNB9;B9FH43;A2Y6U4;A0A0E0HH80	Q2KNB9;B9FH43;A2Y6U4;A0A0E0HH80	Hexokinase-2;Phosphotransferase;Phosphotransferase;Phosphotransferase	HXK2 HXK3 Os05g0532600 LOC_Os05g45590 OSJNBa0053E05.8;OsI_20748;OsJ_19321	7.84779	8.09016e-09	up	3.97229	1	7606200	8383100	10260000	0	0	0	3.95619	3.95243	4.00825	1	1	1
1131	Q5TKP3;A6MZK4;A0A0E0HHK0;B9FLE3;Q5TKP2;A2Y715	Q5TKP3;A6MZK4;A0A0E0HHK0;B9FLE3;Q5TKP2;A2Y715	Putative 60S ribosomal L28 protein;60S ribosomal protein l28;Uncharacterized protein;Uncharacterized protein;Os05g0541900 protein;Uncharacterized protein	OJ1362_G11.15;Os05g0541900 OJ1362_G11.15 OSNPB_050541900;OsI_20825;OsJ_19397	1.31927	0.178456	up	8.77946	8.37972	879180000	728440000	608610000	582290000	87662000	133790000	8.87091	8.76709	8.70039	8.84909	8.0565	8.23357
1132	Q5TKP1;B8AW76;A0A0E0HHK2	Q5TKP1;B8AW76;A0A0E0HHK2	Os05g0542100 protein;Uncharacterized protein;Uncharacterized protein	Os05g0542100 OJ1362_G11.16 OsJ_19399 OSNPB_050542100;OsI_20832	4.9545	0.520729	up	5.63477	3.32603	0	126640000	116890000	0	71600000	0	1	7.95835	7.94594	1	7.97808	1
1133	A0A0E0HHL6;Q65XN1;A2Y727;Q9XEN1	A0A0E0HHL6;Q65XN1;A2Y727;Q9XEN1	Uncharacterized protein;Os05g0543200 protein;Uncharacterized protein;Uncharacterized protein	Os05g0543200 OJ1288_A07.8 OsJ_19409 OSNPB_050543200;OsI_20842	8.87791	5.5829e-08	up	4.15022	1	21664000	24584000	14804000	0	0	0	4.17705	4.18511	4.08851	1	1	1
1134	C7IXC4;A0A0P0V788;Q65X46;A0A0E0HHM5;B8AW86;B9FLF3;A0A0E0HHM0;A0A0E0HHM6;A0A0E0HHM2;A0A0E0HHM4;A0A0E0HHM3;A0A0E0HHM1	C7IXC4;A0A0P0V788;Q65X46;A0A0E0HHM5;B8AW86;B9FLF3;A0A0E0HHM0;A0A0E0HHM6;A0A0E0HHM2;A0A0E0HHM4;A0A0E0HHM3;A0A0E0HHM1	Os01g0702450 protein;Os01g0702450 protein;Os05g0543700 protein;Uncharacterized protein;Uncharacterized protein;Uncharacterized protein;Uncharacterized protein;Uncharacterized protein;Uncharacterized protein;Uncharacterized protein;Uncharacterized protein;U	Os01g0702450;Os01g0702450 OSNPB_010702450;Os05g0543700 Os05g0543700 OJ1206_C08.4 OJ1288_A07.13 OSNPB_050543700;OsI_20846;OsJ_19414	4.65369	0.373901	up	3.21837	1	0	0	66874000	0	0	0	1	1	7.65512	1	1	1
1135	B9FHL4;Q5KQD2;A2Y746;A0A0E0HHR1	B9FHL4;Q5KQD2;A2Y746;A0A0E0HHR1	Uncharacterized protein;Os05g0548100 protein;Uncharacterized protein;Uncharacterized protein	Os05g0548100 OSJNOa0014E02.4 OSNPB_050548100;OsI_20861;OsJ_19429	1.0569	0.980068	up	5.28705	5.20721	36996000	0	51031000	11614000	12568000	0	7.35092	1	7.51022	7.30065	7.32099	1
1138	Q0DG31;B8AWG8;A0A0E0HHY6;B9FLJ3;Q6I614;B8A7L2;B9EYL9;A0A0P0V6L3;A0A0E0FR87	Q0DG31;B8AWG8;A0A0E0HHY6;B9FLJ3;Q6I614	Os05g0556100 protein;Uncharacterized protein;Uncharacterized protein;Uncharacterized protein;Putative dynamin	OJ1214_E03.5;Os01g0681100 OSNPB_010681100;Os05g0556100 Os05g0556100 OSNPB_050556100;OsI_03278;OsI_20926;OsJ_03020;OsJ_19496	6.13095	0.293551	up	7.94616	5.33005	123110000	107210000	140330000	20174000	20948000	0	7.94392	7.87082	8.02376	7.48196	7.5082	1
1141	Q0DG05;A2Y7D9;A0A0E0HI44	Q0DG05;A2Y7D9;A0A0E0HI44	Photosystem I reaction center subunit VI, chloroplastic;Photosystem I reaction center subunit VI, chloroplastic;Uncharacterized protein	PSAH GOS5 Os05g0560000 LOC_Os05g48630 OJ1115_B06.3 OsJ_018737 OsJ_19524 OSJNBa0001A14.18;PSAH GOS5 OsI_020232	1.36287	0.0130029	up	10.4055	9.95885	28537000000	28002000000	30363000000	9804400000	4799200000	8464800000	10.3801	10.3801	10.4562	10.0605	9.75563	10.0605
1142	Q688Y7;B8AWQ2;B9FLL0;D2CMM8;A0A0E0HI49	Q688Y7;B8AWQ2;B9FLL0;D2CMM8;A0A0E0HI49	Tubby-like F-box protein 10;Tubby-like F-box protein;Tubby-like F-box protein;Tubby-like F-box protein;Tubby-like F-box protein	OsI_20962;OsJ_19528;TLP11;TULP10 TULP11 Os05g0560400 LOC_Os05g48670 OJ1115_B06.6	19.7456	0.116148	up	5.30346	1	0	40852000	51283000	0	0	0	1	7.39756	7.51283	1	1	1
1143	Q8S718;A2Z9L8;A0A0E0HIC8;A2Z9K2;A0A0E0HIC3;A3C6P5;A0A0E0IVD7;Q8S7T0;B8BHY6;Q6WSC2;A0A0E0HIC0;Q8S703;A2Z9K8;A2Z9J9;A0A0E0IVE0;Q0IW70;Q8S711;Q9FUE2;A2Z9K7;Q945X1;Q945W2;A3C6P9;A2Z9K4;A0A0E0HIB8;Q7G227;A0A0E0IVE3	Q8S718;A2Z9L8;A0A0E0HIC8;A2Z9K2;A0A0E0HIC3;A3C6P5;A0A0E0IVD7;Q8S7T0;B8BHY6;Q6WSC2;A0A0E0HIC0;Q8S703;A2Z9K8;A2Z9J9;A0A0E0IVE0;Q0IW70;Q8S711;Q9FUE2;A2Z9K7;Q945X1;Q945W2;A3C6P9;A2Z9K4;A0A0E0HIB8;Q7G227;A0A0E0IVE3	Glutathione S-transferase GSTU6, putative, expressed;Uncharacterized protein;Uncharacterized protein;Uncharacterized protein;Uncharacterized protein;Uncharacterized protein;Uncharacterized protein;Os10g0525600 protein;Uncharacterized protein;Glutathione S-	gstu4 OsI_34421;LOC_Os10g38160;LOC_Os10g38580 Os10g0529300 OSJNBa0034L04.5 OSJNBb0038A07.8 OSNPB_100529300;LOC_Os10g38630 OSJNBa0034L04.3 OSJNBb0038A07.5;Os10g0525600 OSJNBb0005J14.12;Os10g0528200 LOC_Os10g38489 Os10g0528200 OsJ_32230 OSJNBa0034L04.24 OSJNBb0038A07.37 OSNPB_100528200;Os10g0529800 OSNPB_100529800;Os10g0530400 LOC_Os10g38700 Os10g0530400 OsJ_32243 OSJNBa0034L04.2 OSJNBb0038A07.4 OS…	76.6524	6.45064e-10	up	7.26026	1	33967000	34199000	31643000	0	0	0	7.29954	7.2485	7.23274	1	1	1
1145	Q6AUF3;E0ZS47;B8AWR8;A0A0E0HIH8	Q6AUF3;E0ZS47;B8AWR8;A0A0E0HIH8	Urease accessory protein G;Urease accessory protein G;Uncharacterized protein;Uncharacterized protein	OsI_20999;UREG;UREG Os05g0565200 LOC_Os05g49050 OsJ_19563 OSJNBb0053D02.18	2.73801	0.52754	up	4.5288	3.07567	23509000	25179000	28937000	9263000	0	0	4.19469	4.19017	5.20153	7.22701	1	1
1146	A0A0P0WR87;B9FLQ7;Q65XK0;B8AWV4;A0A0E0HIT2;A6N0E0;Q5VPB9;A2ZW27;A0A0E0FQC7;A2WTA6	A0A0P0WR87;B9FLQ7;Q65XK0;B8AWV4;A0A0E0HIT2;A6N0E0;Q5VPB9;A2ZW27;A0A0E0FQC7;A2WTA6	Os05g0573700 protein (Fragment);Uncharacterized protein;Ketol-acid reductoisomerase, chloroplastic;Ketol-acid reductoisomerase;Ketol-acid reductoisomerase;Chloroplast reductoisomerase (Fragment);Ketol-acid reductoisomerase;Ketol-acid reductoisomerase;Ketol	Os01g0652600 Os01g0652600 OSJNBb0032K15.18 OSNPB_010652600;Os05g0573700 LOC_Os05g49800 OJ1735_C10.18;Os05g0573700 OSNPB_050573700;OsI_03093;OsI_21076;OsJ_02845;OsJ_19628	121.599	7.4888e-09	up	7.92599	1	125140000	130950000	97159000	0	0	0	7.95948	7.97438	7.8441	1	1	1
1147	Q6F361;A2Y7R4;A0A0E0HIT8;A0A0E0HIT9;A2Y7R0	Q6F361;A2Y7R4;A0A0E0HIT8;A0A0E0HIT9	Malate dehydrogenase;Malate dehydrogenase;Malate dehydrogenase;Malate dehydrogenase	Os05g0574400 Os05g0574400 OJ1268_B08.7 OJ1735_C10.25 OsJ_19634 OSNPB_050574400;OsI_21079;OsI_21084	1.97311	0.373901	up	1.98047	1	0	7964100	0	0	0	0	1	3.94141	1	1	1	1
1148	Q6L5F2;B8AX49;B9FLR5;A0A0E0HIX5	Q6L5F2;B8AX49;B9FLR5;A0A0E0HIX5	Os05g0577800 protein;Uncharacterized protein;Uncharacterized protein;Uncharacterized protein	Os05g0577800 OJ1126_B10.10 OSNPB_050577800;OsI_21112;OsJ_19657	3.79212	0.117168	up	2.92301	1	11728000	0	1769000	0	0	0	4.03292	1	3.7361	1	1	1
1150	H2KX39;Q0IN14;B8BM57;B9GDE8;A0A0E0HJ20;A0A0P0YAL1;A0A0N7KU41;Q0J0Z5	H2KX39;Q0IN14;B8BM57;B9GDE8;A0A0E0HJ20;A0A0P0YAL1	Hsp90 protein, expressed;Hsp90 protein, expressed;Uncharacterized protein;Uncharacterized protein;Uncharacterized protein;Os12g0514500 protein (Fragment)	LOC_Os12g32986;Os09g0474300 OSNPB_090474300;Os12g0514500 LOC_Os12g32986 Os12g0514500 OSNPB_120514500;Os12g0514500 OSNPB_120514500;OsI_38512;OsJ_36277	1.02649	0.655921	up	8.08966	8.05194	204830000	171380000	117460000	80205000	88571000	90720000	8.20901	8.11193	7.94805	8.01515	8.06196	8.07871
1151	A0A0P0WR49;Q6L4S3;A2Y840;A0A0E0HJ78;A0A0E0HJ77;A0A0E0HJ76;Q6K550;Q8H918;A2Z893;A0A0E0IT52;B8BET0;Q0J2C0;A0A0E0IIA1	A0A0P0WR49;Q6L4S3;A2Y840;A0A0E0HJ78;A0A0E0HJ77;A0A0E0HJ76	Os05g0591900 protein (Fragment);Hypersensitive-induced response protein-like protein 1;Uncharacterized protein;Uncharacterized protein;Uncharacterized protein;Uncharacterized protein	HIRL1 Os05g0591900 OsJ_19752 OSNPB_050591900 P0663C08.5;HIRL2 Os09g0361200 OSNPB_090361200 P0711F01.54;LOC_Os10g32700 Os10g0464000 OsJ_31812 OSJNBa0071K18.18 OSNPB_100464000;Os05g0591900 OSNPB_050591900;Os09g0361200;OsI_21211;OsI_31050;OsI_33931	5.73946	0.33601	up	8.12741	5.6065	137850000	126430000	319750000	52287000	67771000	0	8.02376	7.95717	8.40131	7.86714	7.95236	1
1152	Q6L4S1;B8AXJ0;A0A0E0HJ81	Q6L4S1;B8AXJ0;A0A0E0HJ81	ATP-dependent Clp protease proteolytic subunit;ATP-dependent Clp protease proteolytic subunit;ATP-dependent Clp protease proteolytic subunit	Os05g0592100 Os05g0592100 OsJ_19755 OSNPB_050592100 P0663C08.7;OsI_21214	4.3718	0.373901	up	3.12823	1	39157000	0	0	0	0	0	7.38468	1	1	1	1	1
1153	A0A0E0HJ90;A0A0E0HJ91;Q6L4R5;B8AXG9;A0A0E0HJ92;Q84PC1;A0A0E0HJ89	A0A0E0HJ90;A0A0E0HJ91;Q6L4R5;B8AXG9;A0A0E0HJ92;Q84PC1;A0A0E0HJ89	V-type proton ATPase subunit C;V-type proton ATPase subunit C;V-type proton ATPase subunit C;V-type proton ATPase subunit C;V-type proton ATPase subunit C;V-type proton ATPase subunit C (Fragment);V-type proton ATPase subunit C	Os05g0593100 OsJ_19763 OSNPB_050593100 P0663C08.13;OsI_21221	3.971	0.116796	up	2.9895	1	5236900	0	16352000	0	0	0	3.86085	1	4.10765	1	1	1
1154	Q0DFF8;A0A0E0HJ94;A2Y848	Q0DFF8;A0A0E0HJ94	Os05g0593200 protein;Uncharacterized protein	Os05g0593200 Os05g0593200 OsJ_19764 OSNPB_050593200;OsI_21222	4.7119	0.428009	up	8.31141	6.0751	239260000	313470000	230570000	314970000	0	350320000	8.26906	8.4032	8.26197	8.59162	1	8.63368
1155	B8AXH7;Q5TKF4;B9FLX9;A0A0E0HJC6	B8AXH7;Q5TKF4;B9FLX9;A0A0E0HJC6	Nucleoside diphosphate kinase;Nucleoside diphosphate kinase;Nucleoside diphosphate kinase;Nucleoside diphosphate kinase	Os05g0595400 OSJNBa0030I14.12 OSJNBb0086G17.3 OSNPB_050595400;OsI_21239;OsJ_19780	4.1058	0.447393	up	7.87662	5.83896	116120000	136170000	73297000	137400000	144270000	0	7.92545	8.00428	7.70014	8.23808	8.2788	1
1156	Q5KQG1;A0A0P0WRW9;Q40725;C7J2W2;A0A0E0HJG5;B9FJ18;A2Y877;Q688F6	Q5KQG1;A0A0P0WRW9;Q40725;C7J2W2;A0A0E0HJG5;B9FJ18;A2Y877;Q688F6	Putative AT1 protein;Os05g0597200 protein (Fragment);AT1 protein;Os05g0597150 protein;Uncharacterized protein;Uncharacterized protein;Uncharacterized protein;Putative AT hook-containing DNA-binding proteins	AT1;Os05g0597150;Os05g0597200 OSNPB_050597200;OsI_21252;OsJ_19789;OSJNBa0035I01.4;OSJNBb0086G17.14	4.20348	0.116118	up	3.07158	1	15673000	0	16995000	0	0	0	4.10103	1	4.11372	1	1	1
1157	A2Y889;A0A0E0HJI6;Q5VRI5;B9FR18;A0A0P0VKN4;A2X699;Q6YTE2;A2X6A0;A0A0E0G8J6;Q6YTF1;Q69X58;C8C9S7;A0A0E0G8J3;Q8LJD2;A2WRF1;A0A0E0FN86	A2Y889;A0A0E0HJI6;Q5VRI5	Uncharacterized protein;Uncharacterized protein;Cytochrome P450 93G2	CYP76M7 Os06g0599200 LOC_Os06g39780 OsJ_07204 OsJ_21875 OSJNBa0008E01.17 P0025F02.46 P0642B07.53;CYP76M8 Os02g0569400 LOC_Os02g36070 OsJ_07203 OSJNBa0008E01.2 P0025F02.31;CYP93G2 Os06g0102100 LOC_Os06g01250 OSJNBa0075G19.13;Os01g0561600 OsJ_02241 OSNPB_010561600 P0496H05.21;Os02g0569400 OSNPB_020569400;Os02g0569900 OsJ_07204 OSJNBa0008E01.17 OSNPB_020569900 P0025F02.46;OsI_02439;OsI_07737;OsI_077…	128.077	1.67077e-12	up	8.00087	1	132580000	137550000	132970000	0	0	0	7.9991	8.01042	7.99307	1	1	1
1158	Q8H631;A2Y8A0;A0A0E0HJK4;A0A0N7KLD6;Q5VRH3;A2Y8A3	Q8H631;A2Y8A0;A0A0E0HJK4	Acyl-coenzyme A oxidase;Acyl-coenzyme A oxidase;Acyl-coenzyme A oxidase	Os06g0103500 Os06g0103500 OsJ_19813 OSJNBa0075G19.29-1 OSNPB_060103500;Os06g0103500 OSNPB_060103500;OsI_21277;OsI_21280;OSJNBa0075G19.29-2 Os06g0103500 OSNPB_060103500	1.73808	0.0045028	up	8.69462	7.89712	701320000	666860000	505190000	115270000	43082000	35959000	8.73956	8.71509	8.62919	8.16529	7.77654	7.74952
1159	Q9LX04;A2Y8A8;A0A0E0HJM2	Q9LX04;A2Y8A8;A0A0E0HJM2	Os06g0104300 protein;Uncharacterized protein;Uncharacterized protein	Os06g0104300 OsJ_19821 OSNPB_060104300 P0644B06.1;OsI_21286	3.65736	0.11616	up	2.8708	1	4413500	4833500	0	0	0	0	3.77686	3.83555	1	1	1	1
1160	A3B7K0;Q5VS79;B8B1A4;A0A0E0HJM3	A3B7K0;Q5VS79;B8B1A4;A0A0E0HJM3	Uncharacterized protein;Calmodulin-binding protein-like;Uncharacterized protein;Uncharacterized protein	OsI_21287;OsJ_19822;P0644B06.3-1 Os06g0104400 OSNPB_060104400	3.93086	0.116118	up	2.97484	1	7662100	8830200	0	0	0	0	3.95698	3.96755	1	1	1	1
1161	A3B7K5;A0A0E0HJM8;B8B1M2;Q5VS74;Q5VS73;B8ADD6;REV__A0A172XE52	A3B7K5;A0A0E0HJM8;B8B1M2;Q5VS74;Q5VS73	Acetyltransferase component of pyruvate dehydrogenase complex;Acetyltransferase component of pyruvate dehydrogenase complex;Acetyltransferase component of pyruvate dehydrogenase complex;Acetyltransferase component of pyruvate dehydrogenase complex;Dihydrol	OsI_00490;OsI_21298;OsJ_19827;P0644B06.24-1 Os06g0105400 OSNPB_060105400;P0644B06.24-2 Os06g0105400 OSNPB_060105400	5.76874	0.336096	up	8.15662	5.62837	198450000	159980000	200600000	74166000	58688000	0	8.19395	8.07871	8.19722	7.99567	7.88944	1
1164	Q0DTV5;A3AFL8;B7FAF1;A2XE22;Q8H813;A0A0E0HJX6	Q0DTV5;A3AFL8;B7FAF1;A2XE22;Q8H813;A0A0E0HJX6	Os03g0222600 protein;Uncharacterized protein;Os03g0222600 protein;Uncharacterized protein;Caleosin, putative, expressed;Uncharacterized protein	OJ1743A09.14 LOC_Os03g12230;Os03g0222600;Os03g0222600 OSNPB_030222600;OsI_10569;OsJ_09966	79.5085	7.93181e-11	up	7.31304	1	34246000	36114000	36256000	0	0	0	7.30559	7.29693	7.33659	1	1	1
1165	Q8H811;A0A0E0HJY2;Q0DTV2;B8AQW5	Q8H811;A0A0E0HJY2;Q0DTV2	Leucine Rich Repeat family protein, expressed;Uncharacterized protein;Os03g0223000 protein (Fragment)	OJ1743A09.16 Os03g0223000 LOC_Os03g12250 OsJ_09969 OSNPB_030223000;Os03g0223000;OsI_10572	82.653	7.02654e-09	up	7.369	1	43048000	38283000	35522000	0	0	0	7.44236	7.34364	7.32099	1	1	1
1166	A0A0E0HJY8;A0A0E0HJY7;P14654;B8AJN3;A6N051	A0A0E0HJY8;A0A0E0HJY7;P14654;B8AJN3;A6N051	Glutamine synthetase;Glutamine synthetase;Glutamine synthetase cytosolic isozyme 1-2;Glutamine synthetase;Glutamine synthetase root isozyme 5 (Fragment)	GLN1-2 GSR RGS8 Os03g0223400 LOC_Os03g12290 OJ1743A09.19 OsJ_09974;OsI_10575	29.3585	0.0974813	up	8.13859	3.26288	189480000	175840000	169220000	0	0	40227000	8.17736	8.12448	8.11392	1	1	7.78865
1167	Q8H808;A0A0E0HJZ0;Q10PS3;B8AJN4	Q8H808;A0A0E0HJZ0;Q10PS3;B8AJN4	Uncharacterized protein OJ1743A09.20;Uncharacterized protein;HEAT repeat family protein, expressed;Uncharacterized protein	LOC_Os03g12300 Os03g0223700 OsJ_09975 OSNPB_030223700;OJ1743A09.20;OsI_10576	7.22268	1.06911e-07	up	3.85253	1	4701400	4556900	6887800	0	0	0	3.8137	3.82581	3.91809	1	1	1
1168	Q9LWT7;B9FR61;B8B1L2;A0A0E0HK07;Q5VS16;A0A0P0WRT2;B7ETL1;A0A0P0WRM2	Q9LWT7;B9FR61;B8B1L2;A0A0E0HK07;Q5VS16;A0A0P0WRT2;B7ETL1;A0A0P0WRM2	Os06g0113900 protein;Uncharacterized protein;Uncharacterized protein;Uncharacterized protein;Uncharacterized protein P0541H01.18-2;Os06g0113900 protein (Fragment);Os06g0113900 protein;Os06g0113900 protein (Fragment)	Os06g0113900 OSNPB_060113900;OsI_21367;OsJ_19881;P0541H01.18-1 Os06g0113900 OSNPB_060113900;P0541H01.18-2	5.07544	0.373901	up	3.34353	1	139760000	0	0	0	0	0	8.0306	1	1	1	1	1
1170	Q9LWT2;I0J1A0;A2Y8J3;A0A0E0HK13	Q9LWT2;I0J1A0;A2Y8J3;A0A0E0HK13	Os06g0114500 protein;Ozone-responsive stress related protein;Uncharacterized protein;Uncharacterized protein	Os06g0114500 Os06g0114500 OsJ_19889 OSJNBa0019F11.5 OSNPB_060114500 P0541H01.27;OsI_21374;OZS	1.02666	0.456772	up	9.09219	9.05424	1626100000	1621800000	1303000000	922170000	881190000	908410000	9.13724	9.13724	9.0021	9.04843	9.0735	9.04079
1171	Q9LWS6;A2Y8J7;A0A0E0HK18;Q53PM1;A2ZBS0;A2ZBR8;A0A0E0IYK8	Q9LWS6;A2Y8J7;A0A0E0HK18;Q53PM1;A2ZBS0;A2ZBR8;A0A0E0IYK8	Os06g0115100 protein;Uncharacterized protein;Uncharacterized protein;Os11g0161033 protein;Uncharacterized protein;Uncharacterized protein;Uncharacterized protein	Os06g0115100 OsJ_19893 OSJNBa0019F11.12 OSNPB_060115100 P0541H01.34;Os11g0161200 LOC_Os11g06240 Os11g0161033 OsJ_33064 OSNPB_110161200;OsI_21378;OsI_35218;OsI_35220	1.37379	0.00025645	up	8.99924	8.54108	1055600000	1152400000	1475400000	292790000	251720000	309260000	8.94989	9.00705	9.04079	8.55371	8.4903	8.57924
1174	Q5VRK6;B8B1N3;A0A0E0HK39	Q5VRK6;B8B1N3;A0A0E0HK39	Os06g0116800 protein;Uncharacterized protein;Uncharacterized protein	Os06g0116800 Os06g0116800 OsJ_25536 OSJNBa0019F11.32 OSNPB_060116800;OsI_21393	2.00763	0.373901	up	2.00549	1	0	0	10577000	0	0	0	1	1	4.01648	1	1	1
1175	Q5VPQ6;A3B7V2;A0A0E0HK48;B8B1W5;A2Y8L7;A0A0E0HK41;Q5VPR6;A0A0E0G567	Q5VPQ6;A3B7V2;A0A0E0HK48;B8B1W5;A2Y8L7;A0A0E0HK41;Q5VPR6;A0A0E0G567	Os06g0119600 protein;Uncharacterized protein;Uncharacterized protein;Uncharacterized protein;Uncharacterized protein;Uncharacterized protein;Os06g0118700 protein;Uncharacterized protein	Os06g0118700 OSJNBa0062J13.28 OSNPB_060118700;Os06g0119600 OSJNBa0062J13.43 OSNPB_060119600 P0660D08.12;OsI_21398;OsI_21411;OsJ_19928	27.2218	0.116117	up	5.76669	1	0	184300000	184340000	0	0	0	1	8.14516	8.15492	1	1	1
1177	Q6K2P9;A2YZW8;A0A0E0HK70;Q5Z4V2;A2YGM5;A0A0E0HUV5;Q762A7;A0A0P0XK49	Q6K2P9;A2YZW8;A0A0E0HK70;Q5Z4V2;A2YGM5;A0A0E0HUV5;Q762A7;A0A0P0XK49	Os09g0326900 protein;Uncharacterized protein;Uncharacterized protein;Os06g0698674 protein;Uncharacterized protein;Uncharacterized protein;BRI1-KD interacting protein 107 (Fragment);Os09g0326900 protein (Fragment)	bip107;Os06g0698674 Os06g0698674 OsJ_22510 OSNPB_060698674 P0545E05.8;Os09g0326900 OSNPB_090326900;OsI_24333;OsI_30903;P0706E03.4-1 Os09g0326900 OsJ_28887 OSNPB_090326900	3.24022	0.544363	up	7.81655	6.12045	94792000	59032000	142670000	357440000	0	412930000	7.82298	7.59399	8.03267	8.65385	1	8.70751
1178	Q5VRJ8;B7E4S0;B9FR99;B8B1X9;A0A0E0HK81	Q5VRJ8;B7E4S0;B9FR99;B8B1X9;A0A0E0HK81	Peroxisomal membrane protein 11-5;Glabrous leaf protein;Uncharacterized protein;Uncharacterized protein;Uncharacterized protein	GLL;OsI_21452;OsJ_19960;PEX11-5 Os06g0127000 LOC_Os06g03660 OSJNBa0038F22.10-1 P0425F02.44-1	3.40036	0.507811	up	7.62554	5.85985	63435000	52249000	74470000	0	136860000	165980000	7.63854	7.52222	7.71585	1	8.25291	8.32664
1181	A0A0E0HKE5;Q9SNM0;A2Y8W7	A0A0E0HKE5;Q9SNM0;A2Y8W7	Uncharacterized protein;Os06g0132100 protein;Uncharacterized protein	134P10.3 Os06g0132100 OsJ_20008 OSNPB_060132100 P0493C11.33 P0679C08.15;OsI_21496	101.247	1.51262e-09	up	7.66173	1	75600000	60871000	70291000	0	0	0	7.69724	7.6098	7.67816	1	1	1
1186	Q5VQ13;B8B2A4;A0A0E0HKL4	Q5VQ13;B8B2A4;A0A0E0HKL4	ATP-dependent Clp protease proteolytic subunit;ATP-dependent Clp protease proteolytic subunit;ATP-dependent Clp protease proteolytic subunit	Os06g0136800 OsJ_20046 OSNPB_060136800 P0548D03.22;OsI_21540	1.8666	0.706208	up	4.12369	3.22328	17965000	18347000	16749000	31958000	0	0	4.13478	4.12513	4.11116	7.66983	1	1
1187	A0A0E0HKT5;Q2RAP0;Q2QXY1;B8BLZ5;B8BJ24	A0A0E0HKT5;Q2RAP0;Q2QXY1;B8BLZ5;B8BJ24	Uncharacterized protein;L-galactono-1,4-lactone dehydrogenase 1, mitochondrial;L-galactono-1,4-lactone dehydrogenase 2, mitochondrial;Uncharacterized protein;Uncharacterized protein	GLDH1 Os11g0143500 LOC_Os11g04740 OsJ_32931;GLDH2 Os12g0139600 LOC_Os12g04520 OsJ_35179;OsI_35074;OsI_37417	124.851	1.41595e-07	up	7.96406	1	127800000	169070000	89757000	0	0	0	7.97271	8.10909	7.81038	1	1	1
1188	A0A0E0HKW7;B9G9E3;Q2RAL6;B8BJ34	A0A0E0HKW7;B9G9E3;Q2RAL6;B8BJ34	Uncharacterized protein;Uncharacterized protein;AMP-binding enzyme family protein, expressed;Uncharacterized protein	LOC_Os11g04980 Os11g0147000 OSNPB_110147000;OsI_35096;OsJ_32957	29.7075	0.00584756	up	5.89276	1	36043000	30854000	25226000	0	0	0	7.33841	6.13565	4.20421	1	1	1
1190	A0A0P0VPQ5;A2X9P2;Q6Z8I8;A0A0E0HL48	A0A0P0VPQ5;A2X9P2;Q6Z8I8;A0A0E0HL48	Os02g0752000 protein (Fragment);Uncharacterized protein;Os02g0752000 protein;Uncharacterized protein	Os02g0752000 OJ1288_G09.1 OsJ_08408 OSNPB_020752000 P0431B06.42;Os02g0752000 OSNPB_020752000;OsI_08963	2.01449	0.373901	up	2.01041	1	0	0	11344000	0	0	0	1	1	4.03124	1	1	1
1191	Q6Z8J5;B8AIS0;A0A0E0HL52	Q6Z8J5;B8AIS0;A0A0E0HL52	Peptidylprolyl isomerase;Peptidylprolyl isomerase;Peptidylprolyl isomerase	Os02g0751600 Os02g0751600 OsJ_08405 OSNPB_020751600 P0431B06.35;OsI_08960	1.36137	0.000886477	up	8.30414	7.85908	280950000	206350000	298330000	49640000	55129000	50091000	8.32922	8.20901	8.37418	7.8464	7.85474	7.87609
1192	Q6Z8L0;A2X9M9;A0A0E0HL64	Q6Z8L0;A2X9M9;A0A0E0HL64	Mitochondrial transcription termination factor-like;Uncharacterized protein;Uncharacterized protein	Os02g0749800 OsJ_08392 OSNPB_020749800 P0431B06.9;OsI_08947	5.48704	0.122762	up	3.45603	1	24998000	0	28639000	0	0	0	4.20631	1	5.16178	1	1	1
1193	Q6YUV9;A0A0E0HL74;A0A0E0HL73;B8AIV1;A0A0E0HL72;B9F301	Q6YUV9;A0A0E0HL74;A0A0E0HL73;B8AIV1;A0A0E0HL72;B9F301	Transitional endoplasmic reticulum ATPase-like;Uncharacterized protein;Uncharacterized protein;Uncharacterized protein;Uncharacterized protein;Uncharacterized protein	OsI_08942;OsJ_08386;OSJNBa0078N11.41	7.37609	7.11959e-10	up	3.88286	1	6048000	5558300	5791100	0	0	0	3.90008	3.86723	3.88126	1	1	1
1195	Q6Z5N4;A0A0E0HLG0;A0A0E0HNF5;Q654V6;A2YB83;B9FSH9	Q6Z5N4;A0A0E0HLG0	Pyruvate dehydrogenase E1 component subunit alpha-1, mitochondrial;Pyruvate dehydrogenase E1 component subunit alpha	Os02g0739600 LOC_Os02g50620 OsJ_08320 P0684F11.25;Os06g0246500 LOC_Os06g13720 OJ1136_C11.8;OsI_22361;OsJ_20802	121.58	1.48358e-09	up	7.92577	1	107580000	131110000	108500000	0	0	0	7.89041	7.97985	7.90704	1	1	1
1197	A3B8P6;Q5VRS7;B8B382;A0A0E0HLK6	A3B8P6;Q5VRS7;B8B382;A0A0E0HLK6	Uncharacterized protein;Serine/threonine-protein phosphatase;Serine/threonine-protein phosphatase;Serine/threonine-protein phosphatase	Os06g0164100 OSJNBa0015I14.10 OSNPB_060164100;OsI_21802;OsJ_20238	1.5131	0.373901	up	1.59751	1	0	1877300	0	0	0	0	1	2.79252	1	1	1	1
1200	A3B8Z2;A2Y9Z5;A0A0E0HLQ8;Q5SMK1;A0A0N7KLM8	A3B8Z2;A2Y9Z5;A0A0E0HLQ8;Q5SMK1;A0A0N7KLM8	Uncharacterized protein;Uncharacterized protein;Uncharacterized protein;Os06g0180000 protein;Os06g0180000 protein (Fragment)	Os06g0180000 OSJNBa0035I03.24 OSJNBb0019L07.6;Os06g0180000 OSNPB_060180000;OsI_21903;OsJ_20338	4.37926	0.116117	up	3.13069	1	23425000	26107000	0	0	0	0	4.19375	4.19831	1	1	1	1
1201	A0A0N7KLN2;Q6YNJ5;B9FRV4;B8B3I5;Q5SML0;A0A0E0HLU3;Q6YNJ6	A0A0N7KLN2;Q6YNJ5;B9FRV4;B8B3I5;Q5SML0;A0A0E0HLU3;Q6YNJ6	Os06g0183800 protein (Fragment);Chromatin-remodeling factor CHD3;Uncharacterized protein;Uncharacterized protein;Chromatin-remodeling factor CHD3;Uncharacterized protein;Chromatin-remodeling factor CHD3	Os06g0183800 OSNPB_060183800;OsI_21929;OsJ_20361;OSJNBb0036B04.22 P0554A06.6;PKL	2.08984	0.373901	up	2.06339	1	23023000	0	0	0	0	0	4.19017	1	1	1	1	1
1204	Q84ZP1;A2YJC1;A0A0E0HLW6	Q84ZP1;A2YJC1;A0A0E0HLW6	Os07g0208000 protein;Uncharacterized protein;Uncharacterized protein	OJ1559_F09.109 Os07g0208000 OsJ_23513 OSNPB_070208000;OsI_25335	41.7732	0.0814836	up	8.7093	3.32479	649070000	606540000	629220000	69716000	0	0	8.71729	8.69551	8.71509	7.97438	1	1
1205	A0A0E0HLX2;Q6ZIW7;B8B8I7;Q0D7V1;B9FW42	A0A0E0HLX2;Q6ZIW7;B8B8I7;Q0D7V1	Uncharacterized protein;Putative 40S ribosomal protein S2;Uncharacterized protein;Os07g0207400 protein (Fragment)	OJ1119_B04.29;Os07g0207400 Os07g0207400 OSNPB_070207400;OsI_25329;OsJ_23507	2.28216	0.116122	up	2.1904	1	3030900	1654600	0	0	0	0	2.79252	2.77869	1	1	1	1
1206	A0A0E0HLX8;A0A0P0X3S2;Q6ZIX2;A3BHN4;A2YJB1	A0A0E0HLX8;A0A0P0X3S2;Q6ZIX2;A3BHN4;A2YJB1	Uncharacterized protein;Methyltransferase (Fragment);Cycloartenol-C-24-methyltransferase 1;Methyltransferase;Methyltransferase	Os07g0206700 OSNPB_070206700;OsI_25325;OsJ_23503;Smt1-1 Os07g0206700 LOC_Os07g10600 OJ1119_B04.19-1	3.92586	0.116162	up	2.97301	1	6741700	0	9722600	0	0	0	3.92792	1	3.99111	1	1	1
1207	A2YA91;P30298;I3QD82;A0A0E0HM39;A0A0E0HM38;A0A0P0WTZ1;A0A0E0HM40;A2YA89;A0A0E0HMA8	A2YA91;P30298;I3QD82;A0A0E0HM39;A0A0E0HM38;A0A0P0WTZ1;A0A0E0HM40	Sucrose synthase;Sucrose synthase 2;Sucrose synthase;Sucrose synthase;Sucrose synthase;Sucrose synthase (Fragment);Sucrose synthase	Os06g0194900 OSNPB_060194900;OsI_22001;OsI_22003;SUS2 RSS1 RSUS2 Os06g0194900 LOC_Os06g09450 P0648E08.22	105.099	1.05688e-08	up	7.71561	1	91353000	72474000	68576000	0	0	0	7.80223	7.67955	7.66506	1	1	1
1208	P0C5D5;P0C5D4;A0A0E0HM56	P0C5D5;P0C5D4;A0A0E0HM56	Peroxiredoxin Q, chloroplastic;Putative peroxiredoxin Q, chloroplastic;Uncharacterized protein	Os06g0196300 LOC_Os06g09610 OsJ_019618 P0528E04.23;OsI_22010	4.17565	0.116222	up	3.062	1	18378000	12429000	0	0	0	0	4.14336	4.04264	1	1	1	1
1209	A3B999;Q69YA2;A0A0E0HM58;A0A0E0H1E4;A3AU82;Q7XUW9;Q0JCW9;Q01J35;B7F6I0;A2XTX6	A3B999;Q69YA2;A0A0E0HM58	3-oxoacyl-[acyl-carrier-protein] synthase;3-oxoacyl-[acyl-carrier-protein] synthase;3-oxoacyl-[acyl-carrier-protein] synthase	Os04g0445700 Os04g0445700 OSNPB_040445700;Os04g0445700 OSNPB_040445700;Os06g0196600 Os06g0196600 OSNPB_060196600 P0528E04.26;OsI_16057;OSIGBa0140O07.8;OsJ_14945;OsJ_20447;OSJNBa0027P08.14	1.1205	0.406184	up	8.03062	7.86648	71881000	222160000	190710000	46909000	56900000	53950000	7.68128	8.2349	8.1757	7.82298	7.87609	7.90035
1211	Q69K62;A2YAC8;A0A0E0HM72	Q69K62;A2YAC8;A0A0E0HM72	Os06g0198700 protein;Uncharacterized protein;Uncharacterized protein	Os06g0198700 Os06g0198700 B1172G12.18 OsJ_20459 OSNPB_060198700;OsI_22040	4.07351	0.116174	up	3.02627	1	13927000	10538000	0	0	0	0	4.0758	4.00301	1	1	1	1
1212	Q0JKF5;A2WTS1;A0A0E0HMB8;A0A0P0V6J4	Q0JKF5;A2WTS1;A0A0E0HMB8	Os01g0678600 protein;Uncharacterized protein;Uncharacterized protein	Os01g0678600 Os01g0678600 OsJ_03005 OSNPB_010678600;Os01g0678600 OSNPB_010678600;OsI_03263	8.81813	1.51114e-08	up	4.14047	1	20237000	21980000	15486000	0	0	0	4.16166	4.16377	4.09599	1	1	1
1213	B8B3Y3;Q69TX7;A0A0E0HML7;A0A0E0HML8	B8B3Y3;Q69TX7;A0A0E0HML7;A0A0E0HML8	Uncharacterized protein;Os06g0210200 protein;Aminoacylase;Aminoacylase	Os06g0210200 Os06g0210200 OSNPB_060210200 P0021C04.7;OsI_22115	4.11502	0.116201	up	3.0409	1	16023000	11065000	0	0	0	0	4.10591	4.01678	1	1	1	1
1215	A2YAL2;Q69TW4;A2YAK8;A0A0E0HMM6	A2YAL2;Q69TW4;A2YAK8;A0A0E0HMM6	Uncharacterized protein;Os06g0211300 protein;Uncharacterized protein;Uncharacterized protein	OsI_22123;OsI_22127;P0021C04.26-1 P0701E03.3-1 Os06g0211300 OsJ_20563 OSNPB_060211300	4.13367	0.40238	up	7.42253	5.3751	43087000	39706000	44651000	0	29115000	19651000	7.44361	7.36993	7.45404	1	7.62568	7.49963
1216	A2YAN3;B9FS65;Q69Y18;A0A0E0HMN2	A2YAN3;B9FS65;Q69Y18;A0A0E0HMN2	Uncharacterized protein;Uncharacterized protein;Os06g0214800 protein;Uncharacterized protein	Os06g0214800 OSNPB_060214800 P0537F07.15 P0701E03.54;OsI_22148;OsJ_20584	4.0668	0.116203	up	3.02389	1	0	9917800	14318000	0	0	0	1	3.99111	4.08058	1	1	1
1217	B9FS99;B8B4A6;A0A0E0HMW0;A0A0E0HMV9;Q67UI5;A0A0N7KLS7;A0A0E0GLD0	B9FS99;B8B4A6;A0A0E0HMW0;A0A0E0HMV9	Uncharacterized protein;Uncharacterized protein;Uncharacterized protein;Uncharacterized protein	Os06g0223800 OSNPB_060223800;Os06g0223800 P0638H11.22;OsI_22208;OsJ_20645	21.5067	0.117948	up	7.65501	3.2283	69708000	75882000	59454000	32971000	0	0	7.66983	7.71236	7.58285	7.68489	1	1
1218	Q67X24;A2YAW6;A0A0E0HMY2	Q67X24;A2YAW6;A0A0E0HMY2	Os06g0226050 protein;Uncharacterized protein;Uncharacterized protein	Os06g0226050 Os06g0226050 OsJ_20666 OSNPB_060226050 P0690H04.14;OsI_22234	1.95788	0.373901	up	1.96929	1	0	0	6577800	0	0	0	1	1	3.90787	1	1	1
1219	Q67X37;A2YAZ4;A0A0E0HN17	Q67X37;A2YAZ4;A0A0E0HN17	Os06g0231300 protein;Uncharacterized protein;Uncharacterized protein	Os06g0231300 Os06g0231300 OsJ_20696 OSNPB_060231300 P0525F01.37;OsI_22266	2.05767	0.373901	up	2.04101	1	17183000	0	0	0	0	0	4.12304	1	1	1	1	1
1222	A2ZSL3;A2WPD1;A0A0E0HNA8;Q5ZDS5	A2ZSL3;A2WPD1;A0A0E0HNA8;Q5ZDS5	Uncharacterized protein;Uncharacterized protein;Uncharacterized protein;Os01g0329900 protein	OsI_01703;OsJ_01572;P0554D10.24-1 Os01g0329900 OSNPB_010329900	2.05869	0.373901	up	2.04173	1	0	0	17593000	0	0	0	1	1	4.12518	1	1	1
1223	A0A0P0V260;Q5ZDR4;A2WPC9;A0A0E0HNB0	A0A0P0V260;Q5ZDR4;A2WPC9;A0A0E0HNB0	Os01g0329400 protein (Fragment);Os01g0329400 protein;Uncharacterized protein;Uncharacterized protein	Os01g0329400 OsJ_01570 OSNPB_010329400 P0554D10.15;Os01g0329400 OSNPB_010329400;OsI_01701	2.06144	0.373901	up	2.04365	1	0	18773000	0	0	0	0	1	4.13096	1	1	1	1
1224	B8B4H4;Q654G0;A0A0E0HNE5;A0A0P0WUK6;Q0DD82;B9FSH4	B8B4H4;Q654G0;A0A0E0HNE5;A0A0P0WUK6;Q0DD82;B9FSH4	Alpha-mannosidase;Alpha-mannosidase;Alpha-mannosidase;Alpha-mannosidase;Alpha-mannosidase (Fragment);Alpha-mannosidase	Os06g0245700;Os06g0245700 OSNPB_060245700;OsI_22355;OsJ_20797;P0412C04.26	3.79597	0.116137	up	2.92447	1	5356200	0	6549800	0	0	0	3.86607	1	3.90733	1	1	1
1229	Q6ENA3;P0C386;P0C385;P0C384;J3RPW0;E9KIT3;A0A1W5HUQ0;A0A0N9E0T2;A0A0N9E0L4;A0A0K0LS74;A0A0K0LKV4;A0A0E0HNW3	Q6ENA3;P0C386;P0C385;P0C384;J3RPW0;E9KIT3;A0A1W5HUQ0;A0A0N9E0T2;A0A0N9E0L4;A0A0K0LS74;A0A0K0LKV4;A0A0E0HNW3	NAD(P)H-quinone oxidoreductase subunit I, chloroplastic;NAD(P)H-quinone oxidoreductase subunit I, chloroplastic;NAD(P)H-quinone oxidoreductase subunit I, chloroplastic;NAD(P)H-quinone oxidoreductase subunit I, chloroplastic;NAD(P)H-quinone oxidoreductase s	ndhI;ndhI frxB 9311172;ndhI frxB LOC_Osp1g00950 Nip173;ndhI frxB PA173	2.00192	0.373901	up	2.00138	1	0	0	10154000	0	0	0	1	1	4.00415	1	1	1
1232	A3BAX9;B8B0V2;A0A0P0WVJ4;Q5Z6I5;A0A0E0HPA5	A3BAX9;B8B0V2;A0A0P0WVJ4;Q5Z6I5;A0A0E0HPA5	Uncharacterized protein;Uncharacterized protein;Os06g0297700 protein;Os06g0297700 protein;Uncharacterized protein	Os06g0297700 OSJNBa0055N24.35;Os06g0297700 OSNPB_060297700;OsI_22633;OsJ_21054	2.03109	0.373901	up	2.02225	1	0	14007000	0	0	0	0	1	4.06676	1	1	1	1
1234	Q0DCQ4;Q5Z878;B8B0W5;B7F9A6;A0A0E0HPD7;A0A0E0HPD8	Q0DCQ4;Q5Z878;B8B0W5;B7F9A6;A0A0E0HPD7;A0A0E0HPD8	Os06g0301100 protein (Fragment);Uncharacterized protein OJ1217_C01.6;Uncharacterized protein;Os06g0301100 protein;Uncharacterized protein;Uncharacterized protein	OJ1217_C01.6;Os06g0301100;Os06g0301100 OsJ_21075 OSNPB_060301100;OsI_22657	7.907	1.42003e-08	up	3.98313	1	11226000	8980800	8430600	0	0	0	4.02385	3.97024	3.95531	1	1	1
1235	Q5Z4E5;A0A0E0HPG4	Q5Z4E5;A0A0E0HPG4	Os06g0304600 protein;Uncharacterized protein	B1386G10.6-1 Os06g0304600 OSNPB_060304600	8.13609	1.06847e-08	up	4.02434	1	12806000	11513000	9524900	0	0	0	4.05601	4.02863	3.98836	1	1	1
1236	B9FSX3;Q5Z4C9;A2YC54;A0A0E0HPI1	B9FSX3;Q5Z4C9;A2YC54;A0A0E0HPI1	Uncharacterized protein;Os06g0306600 protein;Uncharacterized protein;Uncharacterized protein	Os06g0306600 Os06g0306600 B1386G10.30 OSNPB_060306600;OsI_22686;OsJ_21096	2.09344	0.373901	up	2.06587	1	0	26025000	0	0	0	0	1	4.19762	1	1	1	1
1237	Q7XM53;Q01M78;A2XR29;B7EMI6;A0A0E0HPJ0;Q0JEK3	Q7XM53;Q01M78;A2XR29;B7EMI6;A0A0E0HPJ0;Q0JEK3	OSJNBb0018J12.6 protein;H0616A11.1 protein;Uncharacterized protein;Os04g0253000 protein;Uncharacterized protein;Os04g0253000 protein (Fragment)	H0616A11.1;Os04g0253000;Os04g0253000 OSNPB_040253000;OsI_15099;OsJ_14042 OSJNBb0018J12.6	120.565	2.97369e-12	up	7.91367	1	111200000	119120000	111040000	0	0	0	7.90226	7.91757	7.92119	1	1	1
1238	B9FSX8;Q0DCN0;B8B127;A0A0E0HPJ5	B9FSX8;Q0DCN0;B8B127;A0A0E0HPJ5	Uncharacterized protein;Os06g0309200 protein;Uncharacterized protein;Uncharacterized protein	Os06g0309200;OsI_22701;OsJ_21108	3.95211	0.116136	up	2.98262	1	7422100	10133000	0	0	0	0	3.95331	3.99457	1	1	1	1
1242	Q5VQW7;B9ETS9;B8AAX9;A0A0E0HPW0;A0A0E0HPV9	Q5VQW7;B9ETS9;B8AAX9;A0A0E0HPW0;A0A0E0HPV9	Os01g0805800 protein;Uncharacterized protein;Uncharacterized protein;Uncharacterized protein;Uncharacterized protein	Os01g0805800 OSNPB_010805800 P0034E02.61;OsI_04128;OsJ_03801	1.93958	0.373901	up	1.95574	1	5422900	0	0	0	0	0	3.86723	1	1	1	1	1
1243	P45960;A0A0E0HPW1;B8AAY0	P45960;A0A0E0HPW1;B8AAY0	Tubulin beta-4 chain;Tubulin beta chain;Tubulin beta chain	OsI_04129;TUBB4 OSTB-16 R1623 RTUB-1 TUB4 Os01g0805900 LOC_Os01g59150 P0034E02.62	9.10073	2.73544e-13	up	4.18598	1	22627000	24946000	23091000	0	0	0	4.18511	4.18885	4.18398	1	1	1
1246	A3BB99;Q69PT1;B8B1A8;A0A0E0HQ35	A3BB99;Q69PT1;B8B1A8;A0A0E0HQ35	Uncharacterized protein;Os06g0326700 protein;Uncharacterized protein;Uncharacterized protein	Os06g0326700 Os06g0326700 OSJNBb0039F24.3 OSNPB_060326700 P0652D10.40;OsI_22778;OsJ_21181	1.93323	0.373901	up	1.95101	1	0	5141700	0	0	0	0	1	3.85303	1	1	1	1
1247	Q6H6C7;Q09HR2;B8AIH2;A0A0E0HQB3;A6N1P1;Q09HR1;A6MZY0	Q6H6C7;Q09HR2;B8AIH2;A0A0E0HQB3;A6N1P1;Q09HR1	Phosphoglycerate kinase;Phosphoglycerate kinase;Phosphoglycerate kinase;Phosphoglycerate kinase;Phosphoglycerate kinase (Fragment);Phosphoglycerate kinase	Os02g0169300 Os02g0169300 OsJ_05543 OSNPB_020169300 P0669G09.19;OsI_06015	128.415	9.76629e-09	up	8.00467	1	118660000	134310000	161860000	0	0	0	7.93406	7.99307	8.08688	1	1	1
1249	Q7Y1V2;A2YCL4;A0A0E0HQG0	Q7Y1V2;A2YCL4;A0A0E0HQG0	Eukaryotic translation initiation factor 1A;Uncharacterized protein;Uncharacterized protein	eif-1a-OF2 Os06g0342200 OsJ_21246 OSNPB_060342200 P0459H02.13;OsI_22855	1.05764	0.56681	up	8.05428	7.97343	157910000	142860000	139960000	37912000	72755000	120910000	8.10783	8.03267	8.02235	7.74767	7.98601	8.18661
1250	A0A0E0HQH5;Q6YSE8;B8B8C4	A0A0E0HQH5;Q6YSE8;B8B8C4	Uncharacterized protein;Os07g0608300 protein;Uncharacterized protein	Os07g0608300 Os07g0608300 OsJ_25069 OSJNBa0072I06.36 OSNPB_070608300;OsI_26818	7.71244	3.17159e-07	up	3.94719	1	5600700	11681000	7472500	0	0	0	3.87978	4.03176	3.93002	1	1	1
1251	B9FT60;B8B1Q7;A0A0E0HQS2;A0A0E0HQS0;Q69XR7;A0A0E0HQR9;A0A0E0HQR8	B9FT60;B8B1Q7;A0A0E0HQS2;A0A0E0HQS0;Q69XR7;A0A0E0HQR9;A0A0E0HQR8	Uncharacterized protein;Uncharacterized protein;Acyl-coenzyme A oxidase;Acyl-coenzyme A oxidase;Acyl-coenzyme A oxidase;Acyl-coenzyme A oxidase;Acyl-coenzyme A oxidase	Os06g0354500 OSNPB_060354500 P0526E12.23;OsI_22901;OsJ_21283	1.97754	0.373901	up	1.98371	1	0	8316000	0	0	0	0	1	3.95112	1	1	1	1
1252	Q67VQ6;A0A0E0HR36;A0A0P0WWT3;A2YD15;A3BBV2	Q67VQ6;A0A0E0HR36;A0A0P0WWT3;A2YD15;A3BBV2	Immunophilin-like;Uncharacterized protein;Os06g0484500 protein (Fragment);Uncharacterized protein;Uncharacterized protein	Os06g0484500 OSJNBb0026F02.22;Os06g0484500 OSNPB_060484500;OsI_23009;OsJ_21385	1.19718	0.0254258	up	8.75405	8.49441	761290000	670480000	738530000	203260000	216420000	356120000	8.77426	8.72081	8.76709	8.40823	8.43593	8.63908
1253	Q7FA53;Q01KT9;A0A0E0HR48;B9FEM7;B8ASR0;C7J134	Q7FA53;Q01KT9;A0A0E0HR48;B9FEM7;B8ASR0;C7J134	OSJNBa0018J19.3 protein;OSIGBa0104J13.1 protein;Uncharacterized protein;Uncharacterized protein;Uncharacterized protein;Os04g0358000 protein	Os04g0358000;OsI_15494;OSIGBa0105P02.6 OSIGBa0104J13.1;OsJ_14411;OSJNBa0018J19.3	2.05867	0.373901	up	2.04171	1	17460000	0	0	0	0	0	4.12513	1	1	1	1	1
1254	Q9SXP2;Q0DC43;B8B2F2;A0A0E0HR54;A3BBW2;Q67U69;A2YD25;A0A0E0HR55;A6N0B2	Q9SXP2;Q0DC43;B8B2F2;A0A0E0HR54;A3BBW2;Q67U69;A2YD25;A0A0E0HR55	Formate dehydrogenase 1, mitochondrial;Formate dehydrogenase, mitochondrial;Formate dehydrogenase, mitochondrial;Formate dehydrogenase, mitochondrial;Formate dehydrogenase, mitochondrial;Formate dehydrogenase 2, mitochondrial;Formate dehydrogenase, mitocho	Os06g0486800;Os06g0486800 LOC_Os06g29180 P0008F02.23 P0404G03.8;Os06g0486900 LOC_Os06g29220 OsJ_21395 P0404G03.13;OsI_23019;OsI_23021;OsJ_21394	3.70139	0.478928	up	7.72699	5.83892	84326000	96960000	61288000	143980000	138960000	0	7.74952	7.82901	7.60243	8.25479	8.26197	1
1255	Q0DBY0;Q9ZTS1;B9FTH9;A0A0E0HRH8;B8B332;A6N1D7	Q0DBY0;Q9ZTS1;B9FTH9;A0A0E0HRH8;B8B332;A6N1D7	Os06g0508700 protein;Probable methionine--tRNA ligase;Uncharacterized protein;Uncharacterized protein;Uncharacterized protein;Methionyl-trna synthetase (Fragment)	Os06g0508700;Os06g0508700 LOC_Os06g31210 P0561B08.33;OsI_23153;OsJ_21495	8.76067	0.155412	up	4.13104	1	31024000	24907000	0	0	0	0	7.2048	4.18832	1	1	1	1
1256	Q84PB7;A2YML2;A0A0E0HRV6	Q84PB7;A2YML2;A0A0E0HRV6	Protein THYLAKOID FORMATION1, chloroplastic;Uncharacterized protein;Uncharacterized protein	OsI_26464;THF1 Os07g0558500 LOC_Os07g37250 OsJ_24722 P0567H04.15-1	8.30837	5.63552e-10	up	4.05456	1	12733000	12192000	13671000	0	0	0	4.0541	4.03833	4.07126	1	1	1
1258	A0A0E0HS18;A0A0E0HS17;B9G894;Q2R1J1;B8BLA2;A0A0E0HS16;A0A0P0Y4L5;A0A0E0HBJ8	A0A0E0HS18;A0A0E0HS17;B9G894;Q2R1J1;B8BLA2;A0A0E0HS16	Uncharacterized protein;Uncharacterized protein;Uncharacterized protein;ABC transporter family protein, expressed;Uncharacterized protein;Uncharacterized protein	Os11g0603200 LOC_Os11g39020 Os11g0603200 OSNPB_110603200;Os11g0603200 OSNPB_110603200;OsI_36639;OsJ_34416	3.38333	0.480313	up	7.27905	5.52061	30849000	35514000	37704000	0	32281000	53838000	7.19555	7.28513	7.35648	1	7.66244	7.8994
1260	A2YDT7;A0A0E0HS38;Q5Z6T5	A2YDT7;A0A0E0HS38;Q5Z6T5	Uncharacterized protein;Uncharacterized protein;Os06g0538900 protein	Os06g0538900 B1018E06.5 OsJ_21594 P0551A03.47;OsI_23273	1.82517	0.708745	up	4.03133	3.1633	11785000	11546000	11319000	0	19952000	0	4.03376	4.02986	4.03037	1	7.4899	1
1262	P40393;A2YDY6;A0A0E0HS83	P40393;A2YDY6;A0A0E0HS83	Ras-related protein RIC2;Uncharacterized protein;Uncharacterized protein	OsI_23327;RIC2 SS230 Os06g0551400 LOC_Os06g35814 OsJ_21648 P0659D09.45	1.52943	0.00150656	up	8.37584	7.76284	239090000	311150000	352090000	32847000	39574000	48610000	8.26528	8.39919	8.46303	7.68371	7.73938	7.86544
1265	A0A0E0HSJ4;Q5Z918;A2YE29;A0A0E0HSJ3	A0A0E0HSJ4;Q5Z918;A2YE29;A0A0E0HSJ3	Uncharacterized protein;EREBP-4 like protein;Uncharacterized protein;Uncharacterized protein	Os06g0560400 Os06g0560400 OsJ_21694 OSNPB_060560400 P0528E12.21;OsI_23375	8.75832	2.02798e-10	up	4.13065	1	18490000	18602000	17432000	0	0	0	4.14452	4.12889	4.11855	1	1	1
1266	A2YE70;Q5Z5T2;A0A0E0HSQ9;A3BCW2	A2YE70;Q5Z5T2;A0A0E0HSQ9;A3BCW2	Transmembrane 9 superfamily member;Transmembrane 9 superfamily member;Transmembrane 9 superfamily member;Transmembrane 9 superfamily member	OsI_23414;OsJ_21738;OSJNBa0062E01.3 P0567G03.41	4.87884	0.364529	up	7.75628	5.46974	105220000	95285000	57886000	0	31007000	37011000	7.87828	7.82298	7.56758	1	7.64816	7.76107
1267	Q5Z627;A0A0E0HST0;A3BCY2;B8B3U4;B9F4B5	Q5Z627;A0A0E0HST0;A3BCY2;B8B3U4;B9F4B5	Elongation factor 1-gamma 3;Uncharacterized protein;Uncharacterized protein;Uncharacterized protein;Uncharacterized protein	Os06g0571400 LOC_Os06g37440 OSJNBa0006A22.2 P0610D01.10;OsI_23436;OsJ_05923;OsJ_21756	18.4949	0.020776	up	5.20906	1	12169000	16367000	48066000	0	0	0	4.04315	4.10206	7.48196	1	1	1
1269	A0A0E0HT16;Q69XD4;B8B472;A0A0E0HT15;B9FTZ9	A0A0E0HT16;Q69XD4;B8B472;A0A0E0HT15;B9FTZ9	Uncharacterized protein;Os06g0593100 protein;Uncharacterized protein;Uncharacterized protein;Uncharacterized protein	Os06g0593100 Os06g0593100 OSNPB_060593100 P0502H06.31;OsI_23562;OsJ_21852	18.9266	0.116155	up	5.24235	1	0	36189000	42818000	0	0	0	1	7.30065	7.42639	1	1	1
1270	A2YEP4;A0A0E0HT49;B7EB12;Q69VD1	A2YEP4;A0A0E0HT49;B7EB12;Q69VD1	Uncharacterized protein;Uncharacterized protein;cDNA clone:J013030K22, full insert sequence;Os06g0597900 protein	Os06g0597900 OsJ_21872 OSNPB_060597900 P0417D05.38 P0642B07.6;OsI_23588	2.35961	0.620042	up	4.52311	3.28456	21862000	30171000	25277000	0	0	46971000	4.17913	5.18529	4.2049	1	1	7.85368
1271	A3BKZ9;A0A0P0WYX4;A3C3R8;Q94GM9;A2Z670;Q69XK5;A0A0E0HT70;A2YER1;A0A0E0IQV6;A3BDC1;A2YMH4;Q6ZF86;A0A0E0I256;A0A0E0I267	A3BKZ9;A0A0P0WYX4;A3C3R8;Q94GM9;A2Z670;Q69XK5;A0A0E0HT70;A2YER1;A0A0E0IQV6;A3BDC1;A2YMH4;Q6ZF86;A0A0E0I256;A0A0E0I267	Uncharacterized protein;Os06g0601600 protein (Fragment);Uncharacterized protein;Probable mixed-linked glucan synthase 7;Uncharacterized protein;Putative cellulose synthase A catalytic subunit 11 [UDP-forming];Uncharacterized protein;Uncharacterized protein	CESA11 Os06g0600550 LOC_Os06g39970 P0457B11.25 P0486H12.12;CSLF4 Os07g0553300 LOC_Os07g36740 P0013G11.11;CSLF7 Os10g0343400 LOC_Os10g20260 OSJNBb0052C09.2;Os06g0601600 OSNPB_060601600;OsI_23605;OsI_26429;OsI_33148;OsJ_21890;OsJ_24684;OsJ_31150	4.19969	0.373901	up	3.07028	1	0	0	31243000	0	0	0	1	1	7.21085	1	1	1
1273	A0A0E0HTF1;A3BDI4;Q69X42;A2YEZ0;A0A0P0WYK7;A0A0P0WYZ5	A0A0E0HTF1;A3BDI4;Q69X42;A2YEZ0;A0A0P0WYK7;A0A0P0WYZ5	Glycine cleavage system P protein;Glycine cleavage system P protein;Glycine cleavage system P protein;Glycine cleavage system P protein;Os06g0611900 protein;Os06g0611900 protein (Fragment)	Os06g0611900 OSNPB_060611900;OsI_23687;OsJ_21958;P0429G06.10	91.4336	1.05815e-06	up	7.51465	1	88298000	44405000	36086000	0	0	0	7.77472	7.4377	7.33154	1	1	1
1275	Q69TY4;A2YF78;A0A0E0HTQ4	Q69TY4;A2YF78;A0A0E0HTQ4	Peroxiredoxin-2E-1, chloroplastic;Uncharacterized protein;Uncharacterized protein	OsI_23767;PRXIIE-1 Os06g0625500 LOC_Os06g42000 OSJNBa0029G06.40 OSJNBa0072A21.9	1.95214	0.373901	up	1.96506	1	0	0	6127000	0	0	0	1	1	3.89517	1	1	1
1278	A6N179;Q84VG1;A2YFI5;A0A0E0HU16	A6N179;Q84VG1;A2YFI5;A0A0E0HU16	Charged multivesicular body protein 1b (Fragment);ESCRT-related protein CHMP1;Charged multivesicular body protein 1b;Uncharacterized protein	CHMP1 Os06g0643300 LOC_Os06g43590 OsJ_22129 P0416A11.29;OsI_23871	22.7416	0.106767	up	7.68061	3.17335	71408000	68637000	74094000	22462000	0	0	7.67816	7.65512	7.70855	7.52005	1	1
1279	Q67WN6;B8B0P7;A0A0E0HU25;B9FQ60	Q67WN6;B8B0P7;A0A0E0HU25;B9FQ60	Os06g0644100 protein;Uncharacterized protein;Uncharacterized protein;Uncharacterized protein	Os06g0644100 Os06g0644100 OSNPB_060644100 P0017B12.6 P0416A11.39;OsI_23874;OsJ_22135	92.6089	2.65568e-11	up	7.53308	1	49141000	55446000	51895000	0	0	0	7.52644	7.55177	7.52103	1	1	1
1280	P93409;O80384;Q67WN5;A2YFJ3;A0A0E0HU26;B9FQ61;A0A0N7KMH6;Q67WN4	P93409;O80384;Q67WN5;A2YFJ3;A0A0E0HU26;B9FQ61;A0A0N7KMH6	Vacuolar H+-pyrophosphatase;Ovp1;Inorganic diphosphatase, H+-translocating, vacuolar membrane;Uncharacterized protein;Uncharacterized protein;Uncharacterized protein;Os06g0644200 protein (Fragment)	Os06g0644200 OSNPB_060644200;OsI_23875;OsJ_22136;OVP1;P0017B12.8-1 Os06g0644200 OSNPB_060644200;P0017B12.8-2 Os06g0644200 OSNPB_060644200	117.017	1.77699e-07	up	7.87058	1	80846000	103860000	143570000	0	0	0	7.72257	7.85539	8.03377	1	1	1
1281	Q67WM2;B9FQ68;B8B0Q4;A0A0E0HU44;A0A0E0HU43	Q67WM2;B9FQ68;B8B0Q4;A0A0E0HU44;A0A0E0HU43	Os06g0645400 protein;Uncharacterized protein;Uncharacterized protein;Uncharacterized protein;Uncharacterized protein	OsI_23887;OsJ_22145;P0017B12.25-1 Os06g0645400 OSNPB_060645400	4.22819	0.373901	up	3.08004	1	31823000	0	0	0	0	0	7.24013	1	1	1	1	1
1282	Q67W57;A2YFL3;A0A0E0HU53;Q0DAL0;A2YFM0	Q67W57;A2YFL3;A0A0E0HU53;Q0DAL0	Os06g0646500 protein;Uncharacterized protein;Uncharacterized protein;Os06g0646500 protein (Fragment)	Os06g0646500;Os06g0646500 OJ1226_A12.17 OsJ_22153 OSJNBa0062J02.1 OSNPB_060646500;OsI_23896;OsI_23903	166.036	2.22301e-09	up	8.37535	1	367270000	276300000	275570000	0	0	0	8.4397	8.34919	8.33717	1	1	1
1283	Q67W51;A2YFL7;A0A0E0HU60	Q67W51;A2YFL7;A0A0E0HU60	50S ribosomal protein L35;50S ribosomal protein L35;50S ribosomal protein L35	Os06g0647100 Os06g0647100 OJ1226_A12.25 OsJ_22158 OSJNBa0062J02.9 OSNPB_060647100;OsI_23900	8.98976	0.155934	up	4.16828	1	0	35657000	26510000	0	0	0	1	7.2892	4.21565	1	1	1
1284	Q67WC8;A2YFR4;A0A0E0HUE4	Q67WC8;A2YFR4;A0A0E0HUE4	Os06g0653900 protein;Uncharacterized protein;Uncharacterized protein	Os06g0653900 OsJ_22201 OSJNBa0085J13.23 OSNPB_060653900 P0709F06.6;OsI_23951	6.6859	0.313046	up	5.91389	3.17277	29308000	23074000	50175000	22324000	0	0	6.07113	4.17142	7.49913	7.51831	1	1
1285	A0A0E0HUI6;Q651T8;B8B107;A0A0N7KMJ5;A0A0P0WZY9;B8B103	A0A0E0HUI6;Q651T8;B8B107	Uncharacterized protein;Os06g0662000 protein;Uncharacterized protein	Os06g0662000 Os06g0662000 OsJ_22250 OSJNBa0051O02.43 OSJNBb0065C04.10 OSNPB_060662000;Os06g0662000 OSNPB_060662000;OsI_23997;OsI_24004	1.25227	0.011672	up	8.94676	8.62221	1186300000	969710000	1159400000	256300000	383350000	406130000	9.0021	8.88827	8.94989	8.4903	8.6849	8.69142
1286	Q653V9;B8B1V3;A0A0E0HUM1	Q653V9;B8B1V3;A0A0E0HUM1	Os06g0683200 protein;Uncharacterized protein;Uncharacterized protein	Os06g0683200 Os06g0683200 OsJ_22397 OSNPB_060683200 P0009H10.6 P0547F09.39;OsI_24210	163.213	5.52791e-09	up	8.35061	1	348480000	271310000	240080000	0	0	0	8.42651	8.33717	8.28816	1	1	1
1287	Q655G1;B8B1S0;A0A0E0HUN2;A0A0E0HUN3;A0A0P0X045	Q655G1;B8B1S0;A0A0E0HUN2;A0A0E0HUN3	Os06g0684000 protein;Uncharacterized protein;Uncharacterized protein;Uncharacterized protein	Os06g0684000 OSNPB_060684000;OsI_24219;P0009H10.17-1 Os06g0684000 OsJ_22405 OSNPB_060684000	107.91	6.67116e-09	up	7.75369	1	95450000	77992000	73455000	0	0	0	7.83069	7.72596	7.70442	1	1	1
1288	B8B1T1;Q653F6;A0A0E0HUR4	B8B1T1;Q653F6;A0A0E0HUR4	T-complex protein 1 subunit eta;T-complex protein 1 subunit eta;T-complex protein 1 subunit eta	OsI_24243;OsJ_22426 P0623A10.31 P0661G04.4	76.9323	6.10825e-10	up	7.26552	1	31563000	35134000	33842000	0	0	0	7.22701	7.27603	7.29351	1	1	1
1291	A0A0P0X0G5;Q5Z8Y3;A0A0E0HUY5;A0A0E0HUY4;A0A0E0HUY6;A0A0P0X0J0;A0A0E0HUY7;B9FQR1;B8B250	A0A0P0X0G5;Q5Z8Y3;A0A0E0HUY5;A0A0E0HUY4;A0A0E0HUY6;A0A0P0X0J0;A0A0E0HUY7;B9FQR1;B8B250	Os06g0701300 protein (Fragment);ABC transporter-like;Uncharacterized protein;Uncharacterized protein;Uncharacterized protein;Os06g0701300 protein (Fragment);Uncharacterized protein;Uncharacterized protein;Uncharacterized protein	Os06g0701300 Os06g0701300 OSNPB_060701300 P0596H10.5;Os06g0701300 OSNPB_060701300;OsI_24357;OsJ_22534	2.08476	0.373901	up	2.05988	1	21944000	0	0	0	0	0	4.17964	1	1	1	1	1
1294	A3BFA0;Q5Z9H9;A2YGV2;A0A0E0HV74;Q5Z9H8;A0A0E0HV73;Q5Z9I0;A2YGV1;A0A0E0HV72	A3BFA0;Q5Z9H9;A2YGV2;A0A0E0HV74;Q5Z9H8;A0A0E0HV73	Peptidyl-prolyl cis-trans isomerase;Peptidyl-prolyl cis-trans isomerase;Peptidyl-prolyl cis-trans isomerase;Peptidyl-prolyl cis-trans isomerase;Peptidyl-prolyl cis-trans isomerase;Peptidyl-prolyl cis-trans isomerase	Os06g0708400 OsJ_22613 OSNPB_060708400 P0621D05.44 P0655A07.4;OsI_24413;OsI_24414;OsJ_22614;P0655A07.5-1 P0621D05.45-1 Os06g0708500 OSNPB_060708500;P0655A07.5-2 Os06g0708500 P0621D05.45-2 OSNPB_060708500	8.20898	3.45975e-08	up	4.0372	1	14319000	9923200	11527000	0	0	0	4.0833	3.99161	4.03669	1	1	1
1295	A0A0E0HVC2;Q5Z5X5;B8B2H5	A0A0E0HVC2;Q5Z5X5;B8B2H5	Uncharacterized protein;Os06g0713100 protein;Uncharacterized protein	Os06g0713100 Os06g0713100 OsJ_22641 OSNPB_060713100 P0712G01.15;OsI_24445	8.20019	3.82178e-12	up	4.03566	1	11636000	12217000	11545000	0	0	0	4.03037	4.03933	4.03728	1	1	1
1297	Q5Z7T2;B8B2H8;A0A0E0HVC8;B9FQW2	Q5Z7T2;B8B2H8;A0A0E0HVC8;B9FQW2	Os06g0714200 protein;Uncharacterized protein;Uncharacterized protein;Uncharacterized protein	OJ1136_F03.24 Os06g0714200 OSNPB_060714200;OsI_24450;OsJ_22648	1.96735	0.373901	up	1.97626	1	6748400	0	0	0	0	0	3.92877	1	1	1	1	1
1300	A0A0E0HVF2;Q0D9G9;Q8SB39;Q5Z9N8;A2YH08;A3BFF4;A0A0P0X0X9;A0A0E0HVF3;Q9MB32;A0A0P0X159	A0A0E0HVF2;Q0D9G9;Q8SB39;Q5Z9N8;A2YH08;A3BFF4;A0A0P0X0X9;A0A0E0HVF3;Q9MB32;A0A0P0X159	Uncharacterized protein;Os06g0716700 protein;Heat shock protein 90;90 kDa heat shock protein;Uncharacterized protein;Uncharacterized protein;Os06g0716700 protein (Fragment);Uncharacterized protein;Heat shock protein 90;Os06g0716700 protein (Fragment)	HSP90;OJ1540_H01.1;Os06g0716700;Os06g0716700 OSNPB_060716700;Os06g0716700 OSNPB_060716700 P0481E08.35 P0541C02.2;OsI_24473;OsJ_22671	1.27751	0.00422033	up	8.82323	8.46989	683550000	1001200000	875210000	224770000	274320000	217710000	8.72665	8.91791	8.82513	8.44433	8.51806	8.44728
1301	Q0DA88;Q655S1;A2YG12;A0A0E0HVM5;A6MZA7;C7J3P4;A0A0P0WUS5;B8B492;Q67WJ2;A0A0E0HN00;B8AV41;Q01KF5;A0A0E0H1V9;Q7XJW9;B9FFL5	Q0DA88;Q655S1;A2YG12;A0A0E0HVM5	Os06g0669400 protein (Fragment);ATP-dependent zinc metalloprotease FTSH 2, chloroplastic;Uncharacterized protein;Uncharacterized protein	FTSH2 Os06g0669400 LOC_Os06g45820 OsJ_021445 P0686E06.31-1 P0686E06.31-2;FTSH6 Os06g0229066 LOC_Os06g12370 OsJ_019841 P0425F05.40 P0525F01.10;Os06g0229066;Os06g0229066 OSNPB_060229066;Os06g0669400;OsI_16238;OsI_22249;OsI_24055;OSIGBa0115M15.4;OsJ_15108;OSJNBa0016O02.1	1.30339	0.000198516	up	9.42825	9.04598	3314800000	3193900000	3584500000	903330000	865150000	929840000	9.3811	9.45508	9.44856	9.01191	9.0677	9.05835
1302	Q0D9E9;Q5YLY4;A2YH35;A0A0E0HVN4	Q0D9E9;Q5YLY4;A2YH35;A0A0E0HVN4	Os06g0724200 protein (Fragment);Uncharacterized protein;Uncharacterized protein;Uncharacterized protein	Os06g0724200 Os06g0724200 OSNPB_060724200;OsI_24499;OsJ_22694 P0535F09.33	2.04828	0.373901	up	2.03442	1	0	0	15973000	0	0	0	1	1	4.10325	1	1	1
1304	B8B2L5;A2YH64;A0A0R7FMX6;A0A0E0HVS7;Q0D9C4;I1VSM9	B8B2L5;A2YH64;A0A0R7FMX6;A0A0E0HVS7;Q0D9C4	Catalase;Catalase isozyme B;Catalase;Catalase;Catalase isozyme B	CatB;CATB Os06g0727200 LOC_Os06g51150 OsJ_021830 P0017G10.17;CATB OsI_023657;OsI_24526;rpl2	5.76269	0.318853	up	7.96919	5.44245	120560000	126160000	136010000	30283000	0	29936000	7.94022	7.956	8.01136	7.64246	1	7.68489
1305	Q9ZSU6;Q8H6F1;Q5Z7N3;B8B2L9;A0A0E0HVT4;A0A0E0HVT3	Q9ZSU6;Q8H6F1;Q5Z7N3;B8B2L9;A0A0E0HVT4;A0A0E0HVT3	High mobility group protein;HMG1 protein;HMG protein;Uncharacterized protein;Uncharacterized protein;Uncharacterized protein	HMG;HMG1;Os06g0728000 OsJ_22728 OSNPB_060728000 P0017G10.31;OsI_24530	26.2078	0.11618	up	5.71192	1	129060000	0	185320000	0	0	0	7.97888	1	8.15689	1	1	1
1306	Q5Z5B6;Q5Z5B7;Q6ED64;A2YH75;A0A0E0HVU7;Q5K593;A0A0P0X173	Q5Z5B6;Q5Z5B7;Q6ED64;A2YH75;A0A0E0HVU7;Q5K593;A0A0P0X173	Os06g0729000 protein;Phytoene synthase 1, chloroplastic;Phytoene synthase 1;Phytoene synthase;Uncharacterized protein;Putative phytoene synthase (Fragment);Os06g0729000 protein (Fragment)	Os06g0729000 OSNPB_060729000;OSJNBa0069C14.4-2 Os06g0729000 OSNPB_060729000;ps-L;PSY1 Os06g0729000 OsJ_22735 OSJNBa0069C14.4-1;PSY1 OsI_24538	7.99477	2.26152e-09	up	3.99906	1	9346200	11353000	9230500	0	0	0	3.99526	4.0236	3.9783	1	1	1
1308	A0A0E0HVY0;B8B2X6;Q5Z417;B9FR10	A0A0E0HVY0;B8B2X6;Q5Z417;B9FR10	Uncharacterized protein;Uncharacterized protein;Os06g0730600 protein;Uncharacterized protein	Os06g0730600 Os06g0730600 B1206D04.9 OSJNBa0069C14.32 OSNPB_060730600;OsI_24549;OsJ_22744	1.96923	0.373901	up	1.97763	1	0	7556800	0	0	0	0	1	3.93289	1	1	1	1
1310	Q69RZ5;A0A0E0HW76;B8B6V4;A0A0P0X1Z2	Q69RZ5;A0A0E0HW76;B8B6V4;A0A0P0X1Z2	Putative phospholipase A2, activating protein;Uncharacterized protein;Uncharacterized protein;Os07g0123700 protein	Os07g0123700 OSNPB_070123700;OsI_24733;OSJNBa0057M23.139	17.8507	0.0165287	up	5.15791	1	16481000	16770000	32343000	0	0	0	4.11319	4.10835	7.25219	1	1	1
1312	A0A0E0HWI4	A0A0E0HWI4	Uncharacterized protein	NIV_1	1.96866	0.373901	up	1.97722	1	0	0	7534200	0	0	0	1	1	3.93165	1	1	1
1314	A0A0E0HWZ0;B9FVM4;B8B7P4;C7J4W5;B7EDV2	A0A0E0HWZ0;B9FVM4;B8B7P4;C7J4W5;B7EDV2	Uncharacterized protein;Uncharacterized protein;Uncharacterized protein;Os07g0163000 protein;Os07g0163000 protein	Os07g0163000;Os07g0163000 OSNPB_070163000;OsI_24999;OsJ_23188	38.0817	0.00759031	up	6.25103	1	34713000	35729000	19612000	0	0	0	7.31828	7.292	4.14279	1	1	1
1316	B7EZH4;Q0D8E4;B8B7K8;Q7XID8;B9FVN3;A0A0E0HX07	B7EZH4;Q0D8E4;B8B7K8;Q7XID8;B9FVN3;A0A0E0HX07	cDNA clone:002-111-H09, full insert sequence;Os07g0165000 protein (Fragment);Uncharacterized protein;Putative prolyl-tRNA synthetase;Uncharacterized protein;Uncharacterized protein	Os07g0165000 Os07g0165000 OSNPB_070165000;OsI_25016;OsJ_23204;P0039H02.111	75.8969	2.87309e-09	up	7.24597	1	31429000	36326000	31274000	0	0	0	7.21237	7.30418	7.22137	1	1	1
1317	Q7XID1;B8B7L4;A0A0E0HX20;A0A0E0HX19;Q5JN47;A2WZA8;A0A0E0FZ30	Q7XID1;B8B7L4;A0A0E0HX20;A0A0E0HX19;Q5JN47;A2WZA8;A0A0E0FZ30	Os07g0166100 protein;Uncharacterized protein;Uncharacterized protein;Uncharacterized protein;Os01g0958700 protein;Uncharacterized protein;Uncharacterized protein	Os01g0958700 Os01g0958700 OsJ_04831 OSNPB_010958700 P0401G10.7;OsI_05280;OsI_25027;P0039H02.131 OJ1641_C04.115 Os07g0166100 OsJ_23214 OSNPB_070166100	9.07759	1.24392e-08	up	4.18231	1	27517000	22484000	20669000	0	0	0	4.22467	4.16728	4.15498	1	1	1
1318	A0A0E0HX41;Q69LE4;A2YIJ5;Q0D8C5;B7E8G5;B8B093;Q69X84;A3BD66;A2YEK2;A0A0E0GHT8;Q6L5J3;B9FHB4;A0A0E0HHA4;Q2R256;A3CCL0;A0A0E0J3K5;A2ZFM2;Q75KT9	A0A0E0HX41;Q69LE4;A2YIJ5;Q0D8C5;B7E8G5;B8B093;Q69X84;A3BD66;A2YEK2;A0A0E0GHT8;Q6L5J3;B9FHB4;A0A0E0HHA4;Q2R256;A3CCL0;A0A0E0J3K5;A2ZFM2;Q75KT9	Uncharacterized protein;Os07g0168600 protein;Uncharacterized protein;Os07g0168600 protein (Fragment);cDNA clone:001-114-D03, full insert sequence;Uncharacterized protein;Os06g0590600 protein;Uncharacterized protein;Uncharacterized protein;Uncharacterized p	LOC_Os11g36940 Os11g0577800;OJ1014_C08.9;Os05g0535100 Os05g0535100 OJ1741_B01.1 OSNPB_050535100;Os06g0590600 OSNPB_060590600 P0633E08.25;Os07g0168600;Os07g0168600 OsJ_23232 OSJNBa0050F10.9 OSNPB_070168600;OsI_20766;OsI_23546;OsI_25042;OsI_36575;OsJ_19341;OsJ_21839;OsJ_34360	1.96884	0.373901	up	1.97734	1	6899300	0	0	0	0	0	3.93203	1	1	1	1	1
1324	Q7XI14;B8B7X6;A0A0E0HXL7;A0A0E0HXL6	Q7XI14;B8B7X6;A0A0E0HXL7;A0A0E0HXL6	Probable D-2-hydroxyglutarate dehydrogenase, mitochondrial;Probable D-2-hydroxyglutarate dehydrogenase, mitochondrial;Uncharacterized protein;Uncharacterized protein	D2HGDH Os07g0187200 LOC_Os07g08950 OsJ_23376 OSJNBb0084L07.2 P0506C07.26;D2HGDH OsI_25178	95.3517	1.54634e-08	up	7.57519	1	64324000	48376000	61055000	0	0	0	7.64371	7.48557	7.59628	1	1	1
1325	A0A0E0HXM3;A0A0E0HXM4;Q6Z4F3;B8B7X9;A0A0E0HXM2;A3BHC0	A0A0E0HXM3;A0A0E0HXM4;Q6Z4F3;B8B7X9;A0A0E0HXM2;A3BHC0	Uncharacterized protein;Uncharacterized protein;Os07g0187700 protein;Uncharacterized protein;Uncharacterized protein;Uncharacterized protein	Os07g0187700 Os07g0187700 OSJNBb0084L07.11 OSNPB_070187700;OsI_25181;OsJ_23379	4.60124	0.373901	up	3.20202	1	59424000	0	0	0	0	0	7.60607	1	1	1	1	1
1326	B8B7Y1;C7J528;B9FVX4;Q6Z4E9;A0A0E0HXN3;A0A0E0HXN2;A0A0E0HXN1	B8B7Y1;C7J528;B9FVX4;Q6Z4E9;A0A0E0HXN3;A0A0E0HXN2;A0A0E0HXN1	Peptidylprolyl isomerase;Peptidylprolyl isomerase;Peptidylprolyl isomerase;Peptidylprolyl isomerase;Peptidylprolyl isomerase;Peptidylprolyl isomerase;Peptidylprolyl isomerase	Os07g0188233;OsI_25185;OsJ_23382;OSJNBb0002L09.6 OSJNBb0084L07.18	86.2443	6.24157e-09	up	7.43036	1	44127000	39195000	47084000	0	0	0	7.45764	7.35804	7.4754	1	1	1
1328	Q8GTK8;B8B8E9;A0A0E0HY40;A0A0E0HY39	Q8GTK8;B8B8E9;A0A0E0HY40;A0A0E0HY39	Os07g0212200 protein;Uncharacterized protein;Uncharacterized protein;Uncharacterized protein	OJ1664_D08.107 Os07g0212200 OsJ_23541 OSJNBb0042J07.14 OSNPB_070212200;OsI_25360	46.3303	0.00113172	up	6.53388	1	29047000	32537000	30782000	0	0	0	5.2063	7.21237	7.18298	1	1	1
1330	E2DX13;E2DWY8;E2DWX6;E2DWR9;Q8L3Y6;Q0D7Q0;A0A0E0HY85;A3BHW8;B8B8G9	E2DX13;E2DWY8;E2DWX6;E2DWR9;Q8L3Y6;Q0D7Q0;A0A0E0HY85;A3BHW8;B8B8G9	60S ribosomal protein (Fragment);60S ribosomal protein (Fragment);60S ribosomal protein (Fragment);60S ribosomal protein (Fragment);Putative 60S ribosomal protein L24;Os07g0224000 protein;Uncharacterized protein;Uncharacterized protein;Uncharacterized prot	OJ1118_B03.114 P0668C05.105;Os07g0224000;OsI_25404;OsJ_23584	4.23158	0.373901	up	3.08119	1	31873000	0	0	0	0	0	7.24358	1	1	1	1	1
1332	Q8H430;A3BI26;A2YJQ0;A0A0E0HYG6	Q8H430;A3BI26;A2YJQ0;A0A0E0HYG6	Breast adenocarcinoma marker-like;Uncharacterized protein;Uncharacterized protein;Uncharacterized protein	OsI_25454;OsJ_23641;P0407H12.144 Os07g0236800 OSNPB_070236800	4.30838	0.116122	up	3.10715	1	21209000	20497000	0	0	0	0	4.17221	4.14923	1	1	1	1
1334	A3BI48;A2YJS2;Q7F0B4;A0A0E0HYH3	A3BI48;A2YJS2;Q7F0B4;A0A0E0HYH3	Uncharacterized protein;Uncharacterized protein;Chloroplast lumen common protein family-like protein;Uncharacterized protein	OsI_25475;OsJ_23660;P0523A04.122 Os07g0240300 OSNPB_070240300	4.48642	0.516837	up	5.3188	3.15324	48306000	44790000	0	0	0	17338000	7.51405	7.44236	1	1	1	7.45972
1337	A3AVY2;A2Z590;A0A0E0HZF1	A3AVY2;A2Z590;A0A0E0HZF1	Uncharacterized protein;Uncharacterized protein;Uncharacterized protein	OsI_32813;OsJ_15607	7.47713	1.53163e-07	up	3.90248	1	4834700	8054900	7560400	0	0	0	3.82953	3.94589	3.93203	1	1	1
1339	A0A0P0X4X0;A2YKM2;A3BJ14;A0A0E0HZJ6	A0A0P0X4X0;A2YKM2;A3BJ14;A0A0E0HZJ6	Os07g0419900 protein;Uncharacterized protein;Uncharacterized protein;Uncharacterized protein	Os07g0419900 OSNPB_070419900;OsI_25768;OsJ_23992	8.50999	2.08223e-09	up	4.08916	1	16611000	14360000	14286000	0	0	0	4.11543	4.07208	4.07995	1	1	1
1340	A2YKV0;A0A0E0HZX8	A2YKV0;A0A0E0HZX8	Uncharacterized protein;Uncharacterized protein	OsI_25843	4.14465	0.116152	up	3.05125	1	0	12732000	16198000	0	0	0	1	4.04783	4.10591	1	1	1
1343	Q7EY59;B8B5Q5;A0A0E0HZZ2;B9FX13	Q7EY59;B8B5Q5;A0A0E0HZZ2;B9FX13	Os07g0452500 protein;Uncharacterized protein;Uncharacterized protein;Uncharacterized protein	OsI_25857;OsJ_24107;OSJNBb0062P14.116-1 Os07g0452500 OSNPB_070452500	8.88168	4.79798e-11	up	4.15083	1	18329000	20627000	21068000	0	0	0	4.14205	4.15009	4.16036	1	1	1
1345	A0A0E0I077;A0A0E0I078;Q8GU95;Q688Q9;Q6Z3A3;A2YL07;B9FX31;B8B5S6;B9FM97;A0A0E0H8X7;A0A0P0WHK0;A0A0P0X5S5	A0A0E0I077;A0A0E0I078;Q8GU95;Q688Q9;Q6Z3A3;A2YL07;B9FX31;B8B5S6;B9FM97;A0A0E0H8X7	Uncharacterized protein;Uncharacterized protein;Glutamate--cysteine ligase A, chloroplastic;Glutamate--cysteine ligase A, chloroplastic;Glutamate--cysteine ligase B, chloroplastic;Glutamate--cysteine ligase B, chloroplastic;Uncharacterized protein;Uncharac	GSH1-1 Os05g0129000 LOC_Os05g03820 OSJNBa0056I11.11;GSH1-1 OsI_18304;GSH1-2 Os07g0462000 LOC_Os07g27790 P0038F09.39;GSH1-2 OsI_025000;Os05g0129000 OSNPB_050129000;Os07g0462000 OSNPB_070462000;OsI_25896;OsJ_16990;OsJ_24143	2.32542	0.116117	up	2.21749	1	3368700	2691200	0	0	0	0	2.82623	2.82623	1	1	1	1
1348	B9FX50;Q0D6K6;B8B5Y0;A0A0E0I0E4;Q69WE1	B9FX50;Q0D6K6;B8B5Y0;A0A0E0I0E4;Q69WE1	Uncharacterized protein;Os07g0470700 protein;Uncharacterized protein;Uncharacterized protein;Plastid-lipid associated protein PAP/fibrillin family-like	OJ1103_E04.105;Os07g0470700 Os07g0470700 OSNPB_070470700;OsI_25937;OsJ_24188	104.041	3.76026e-10	up	7.70101	1	81169000	69986000	74399000	0	0	0	7.7251	7.66384	7.71409	1	1	1
1349	Q8GVP6;A2YM35;A0A0E0I0K4	Q8GVP6;A2YM35;A0A0E0I0K4	Probable pyruvate, phosphate dikinase regulatory protein, chloroplastic;Probable pyruvate, phosphate dikinase regulatory protein, chloroplastic;Uncharacterized protein	PDRP1 Os07g0530600 LOC_Os07g34640 OsJ_023576 P0681F05.120;PDRP1 OsI_025378	4.11564	0.116161	up	3.04112	1	15106000	11544000	0	0	0	0	4.09389	4.02947	1	1	1	1
1350	Q6K5R6;A6N079;A0A0E0I0M1	Q6K5R6;A6N079;A0A0E0I0M1	Os02g0478600 protein;40S ribosomal protein S15a;Uncharacterized protein	Os02g0478600 Os02g0478600 OsJ_06729 OSNPB_020478600 P0527E02.35;OsI_07208	8.54678	0.153749	up	4.09538	1	0	31639000	23203000	0	0	0	1	7.10075	4.18539	1	1	1
1351	A0A0P0X5S7;Q7XHR2;B9FXA4;B8B674;A0A0E0I0Z0	A0A0P0X5S7;Q7XHR2;B9FXA4;B8B674;A0A0E0I0Z0	Os07g0490200 protein (Fragment);Calmodulin-binding transcription activator CBT;Uncharacterized protein;Uncharacterized protein;Uncharacterized protein	CBT Os07g0490200 LOC_Os07g30774 P0477A12.32;Os07g0490200 OSNPB_070490200;OsI_26043;OsJ_24293	1.50964	0.373901	up	1.5942	1	0	1706700	0	0	0	0	1	2.78261	1	1	1	1
1353	Q8H4Q9;A0A0E0I134;B9FXC5;B8B6D3;Q10QM5;Q10QM4	Q8H4Q9;A0A0E0I134;B9FXC5;B8B6D3	GTP-binding protein Rab6;Uncharacterized protein;Uncharacterized protein;Uncharacterized protein	LOC_Os03g09140;OJ1457_D07.114 Os07g0496000 OSNPB_070496000;Os03g0191400 LOC_Os03g09140 OSNPB_030191400;OsI_26083;OsJ_24329	7.15174	0.281763	up	8.40378	5.56549	379410000	346170000	247750000	56133000	48021000	0	8.46613	8.44883	8.29638	7.88725	7.80921	1
1354	A0A0N7KNH1;A0A0E0I136;B8B6D4;Q7F190	A0A0N7KNH1;A0A0E0I136;B8B6D4;Q7F190	Malic enzyme (Fragment);Uncharacterized protein;Malic enzyme;Malic enzyme	OJ1457_D07.117 Os07g0496200 OsJ_24330 OSNPB_070496200;Os07g0496200 OSNPB_070496200;OsI_26084	101.173	1.24168e-09	up	7.66068	1	61789000	75768000	66726000	0	0	0	7.62273	7.70855	7.65076	1	1	1
1355	A0A0E0I169;A6N000	A0A0E0I169;A6N000	Uncharacterized protein;Zac, putative		4.06904	0.116196	up	3.02469	1	14132000	10126000	0	0	0	0	4.07995	3.99411	1	1	1	1
1357	Q6Z481;A0A0E0I189	Q6Z481;A0A0E0I189	Glycosyltransferase;Glycosyltransferase	Os07g0503300 Os07g0503300 OsJ_24364 OSNPB_070503300 P0430F03.25	6.97458	5.93036e-09	up	3.80211	1	4502200	4817600	2960200	0	0	0	3.78639	3.83353	3.78639	1	1	1
1359	Q8H4B9;B8B6M5;A0A0E0I1E3;A6N181	Q8H4B9;B8B6M5;A0A0E0I1E3;A6N181	Os07g0516200 protein;Uncharacterized protein;Uncharacterized protein;Uncharacterized protein (Fragment)	OsI_26193;P0048D08.132 Os07g0516200 OsJ_24449 OSNPB_070516200 P0650C03.11	19.9089	0.116159	up	5.31534	1	40929000	0	55229000	0	0	0	7.40592	1	7.5401	1	1	1
1360	Q8H3H8;A2YLN1;A0A0E0I1V4	Q8H3H8;A2YLN1;A0A0E0I1V4	Os07g0506000 protein;Uncharacterized protein;Uncharacterized protein	Os07g0506000 Os07g0506000 OsJ_24375 OSJNBb0062D12.107 OSNPB_070506000;OsI_26130	8.59414	5.33509e-08	up	4.10335	1	12688000	16318000	20780000	0	0	0	4.05261	4.10055	4.1569	1	1	1
1361	B9FXQ1;B8B6Z9;A0A0E0I1V7;Q0D5S1;Q84S76	B9FXQ1;B8B6Z9;A0A0E0I1V7;Q0D5S1;Q84S76	Uncharacterized protein;Uncharacterized protein;Uncharacterized protein;Os07g0539900 protein;Putative beta-1,3-glucanase	Os07g0539900 Os07g0539900 OSNPB_070539900;OsI_26347;OsJ_24595;P0458H05.105 P0696F12.48	2.0348	0.373901	up	2.02489	1	0	0	13864000	0	0	0	1	1	4.07466	1	1	1
1362	B9FXP8;A0A0E0I1W2;Q6YVU7	B9FXP8;A0A0E0I1W2;Q6YVU7	Uncharacterized protein;Uncharacterized protein;Os07g0539100 protein	Os07g0539100 OSNPB_070539100 P0696F12.28;OsJ_24590	18.392	0.0192692	up	5.20101	1	12694000	18890000	42170000	0	0	0	4.05305	4.13254	7.41744	1	1	1
1367	Q6ZF30;A2YMN1;A0A0E0I2D0;O22542	Q6ZF30;A2YMN1;A0A0E0I2D0;O22542	Chlorophyll a-b binding protein, chloroplastic;Chlorophyll a-b binding protein, chloroplastic;Chlorophyll a-b binding protein, chloroplastic;Chlorophyll a-b binding protein, chloroplastic	Os07g0562700 OsJ_24743 OSNPB_070562700 P0406F06.32;OsI_26482	185.288	1.24546e-09	up	8.53363	1	433090000	456290000	365170000	0	0	0	8.54869	8.57388	8.47832	1	1	1
1369	A0A0N7KNP7;Q84SL0;A2YMS7;A0A0E0I2H8;Q75GE8;A2XN71;A0A0E0GVD7	A0A0N7KNP7;Q84SL0;A2YMS7;A0A0E0I2H8;Q75GE8;A2XN71;A0A0E0GVD7	Os07g0568600 protein (Fragment);Calcium-dependent protein kinase 20;Uncharacterized protein;Uncharacterized protein;Calcium-dependent protein kinase 8;Uncharacterized protein;Uncharacterized protein	CPK20 Os07g0568600 LOC_Os07g38120 OJ1092_A07.132 OsJ_24795;CPK8 Os03g0808600 LOC_Os03g59390 OsJ_13049 OSJNBa0028F23.27 OSJNBa0060M17.7;Os07g0568600 OSNPB_070568600;OsI_14004;OsI_26532	8.83243	1.68827e-08	up	4.14281	1	15301000	21791000	21824000	0	0	0	4.0973	4.16127	4.16987	1	1	1
1372	A0A0E0I2Q4;Q0D576;B8B7R2;A0A0E0I2Q3	A0A0E0I2Q4;Q0D576;B8B7R2;A0A0E0I2Q3	Uncharacterized protein;Probable homogentisate phytyltransferase 2, chloroplastic;Uncharacterized protein;Uncharacterized protein	HPT2 VTE2-2 Os07g0576000 LOC_Os07g38850 OJ1065_B06.2-1 OsJ_24854;OsI_26593	4.9326	0.373901	up	3.30235	1	0	115670000	0	0	0	0	1	7.90704	1	1	1	1
1373	Q6ZL95;A2YMZ1;A0A0E0I2S4	Q6ZL95;A2YMZ1;A0A0E0I2S4	Chlorophyll a-b binding protein, chloroplastic;Chlorophyll a-b binding protein, chloroplastic;Chlorophyll a-b binding protein, chloroplastic	OJ1065_B06.19-1 Os07g0577600 OsJ_24861 OSNPB_070577600;OsI_26600	9.62578	0.243388	up	6.35487	3.08797	85195000	34753000	12186000	10236000	0	0	7.75564	7.26115	4.04783	7.26391	1	1
1379	Q6ZIQ4;B8B840;A0A0E0I2Z6;B9FY59	Q6ZIQ4;B8B840;A0A0E0I2Z6;B9FY59	Glycosyltransferase;Glycosyltransferase;Glycosyltransferase;Glycosyltransferase	Os07g0587100 OJ1047_C01.5 OSNPB_070587100;OsI_26669;OsJ_24927	6.40036	0.319573	up	5.92424	3.24609	37809000	30539000	28919000	36701000	0	0	7.36299	5.21065	5.19909	7.73827	1	1
1381	A2YNC3;A0A0E0I379;A0A0P0X8N3;A3BLU3;Q7XIB3	A2YNC3;A0A0E0I379;A0A0P0X8N3;A3BLU3	Uncharacterized protein;Uncharacterized protein;Os07g0597100 protein (Fragment);Uncharacterized protein	Os07g0597100 OSNPB_070597100;OsI_26734;OsJ_24988;P0453E05.123 Os07g0597100 OJ1579_C03.5	116.528	9.60813e-10	up	7.86453	1	98350000	98117000	109190000	0	0	0	7.8464	7.83432	7.91287	1	1	1
1382	A0A0E0I394;Q7XAM2;A0A0E0I393;A3BLV6;A2YND5	A0A0E0I394;Q7XAM2;A0A0E0I393;A3BLV6;A2YND5	Uncharacterized protein;Os07g0599000 protein;Uncharacterized protein;Uncharacterized protein;Uncharacterized protein	OJ1634_B10.107 Os07g0599000 OSNPB_070599000;OsI_26746;OsJ_25000	16.0659	0.180366	up	7.47615	3.47023	38038000	65052000	43423000	0	0	203580000	7.3677	7.63017	7.43059	1	1	8.41068
1383	A0A0E0I3D3;A0A0E0I3D5;A0A0E0I3D4;B9FYA3;B8B8D4	A0A0E0I3D3;A0A0E0I3D5;A0A0E0I3D4;B9FYA3;B8B8D4	Uncharacterized protein;Uncharacterized protein;Uncharacterized protein;Uncharacterized protein;Uncharacterized protein	OsI_26767;OsJ_25019	4.17374	0.116121	up	3.06134	1	15775000	0	14458000	0	0	0	4.10206	1	4.08196	1	1	1
1386	Q6Z4G3;B8B8B1;A0A0E0I3G1;A2XJ86	Q6Z4G3;B8B8B1;A0A0E0I3G1	UDP-arabinopyranose mutase 3;Uncharacterized protein;Uncharacterized protein	OsI_12510;OsI_26792;UAM3 RGP3 Os07g0604800 LOC_Os07g41360 OsJ_25044 OSJNBb0040H10.21	85.1849	1.57206e-08	up	7.41253	1	47613000	39253000	39098000	0	0	0	7.50391	7.35962	7.37405	1	1	1
1389	Q8H3I4;B8B8K5;A0A0E0I3N5	Q8H3I4;B8B8K5;A0A0E0I3N5	Peroxisomal (S)-2-hydroxy-acid oxidase GLO4;Peroxisomal (S)-2-hydroxy-acid oxidase GLO4;Uncharacterized protein	GLO4 Os07g0616500 B1056G08.112 OsJ_25131;GLO4 OsI_26871	98.6301	4.65981e-08	up	7.62396	1	61622000	78992000	51537000	0	0	0	7.62177	7.73275	7.51735	1	1	1
1390	A0A0P0YB50;A0A0P0YB67;Q762A0;A0A0E0I3R1;A3CI79;A2ZLE4;Q0IMS5;A0A0E0I3R2	A0A0P0YB50;A0A0P0YB67;Q762A0;A0A0E0I3R1;A3CI79;A2ZLE4;Q0IMS5;A0A0E0I3R2	Os12g0548300 protein (Fragment);Nucleoside diphosphate kinase (Fragment);Nucleoside diphosphate kinase (Fragment);Nucleoside diphosphate kinase;Nucleoside diphosphate kinase;Nucleoside diphosphate kinase;Nucleoside diphosphate kinase;Nucleoside diphosphate	bip114;Os12g0548300 LOC_Os12g36194 Os12g0548300 OSNPB_120548300;Os12g0548300 OSNPB_120548300;OsI_38642;OsJ_36416	36.8267	0.00648663	up	6.20268	1	31038000	26881000	30917000	0	0	0	7.20828	4.20421	7.19555	1	1	1
1391	B8BMF7;Q2QNU0;B9GDP5;A0A0E0I3U7	B8BMF7;Q2QNU0;B9GDP5;A0A0E0I3U7	Uncharacterized protein;Trafficking protein particle complex II-specific subunit 130 homolog;Uncharacterized protein;Uncharacterized protein	OsI_38682;OsJ_36462;TRS130 Os12g0554400 LOC_Os12g36760	1.90977	0.373901	up	1.9334	1	0	0	3414100	0	0	0	1	1	3.80021	1	1	1
1395	Q7X7S9;B9FU86;B8B8K7;A0A0E0I410;Q0D4M5;B9F5J7;A0A0E0G2E7;A0A0P0VTZ7;B8APP5;Q94HF9;Q10QT9;A0A0E0G2E8	Q7X7S9;B9FU86;B8B8K7;A0A0E0I410;Q0D4M5	Putative alanine aminotransferase;Uncharacterized protein;Uncharacterized protein;Uncharacterized protein;Os07g0617800 protein	LOC_Os03g08530;Os03g0183600 OSNPB_030183600;Os07g0617800 Os07g0617800 OSNPB_070617800;OsI_10280;OsI_26881;OsJ_09679;OsJ_25140;OSJNBa0032G08.9;P0552F09.120 B1056G08.137	91.8814	2.45478e-09	up	7.5217	1	47823000	57521000	47907000	0	0	0	7.50554	7.57862	7.48094	1	1	1
1397	Q8LH97;A2YNT9;A0A0E0I466	Q8LH97;A2YNT9;A0A0E0I466	40S ribosomal protein S6;40S ribosomal protein S6;40S ribosomal protein S6	OsI_26912;P0594D10.135 Os07g0622100 OsJ_25168 OSNPB_070622100	120.005	1.14246e-07	up	7.90695	1	145650000	102080000	88892000	0	0	0	8.06765	7.8464	7.80682	1	1	1
1398	A2YNU0;Q0D4J5;A0A0E0I468;Q75W16	A2YNU0;Q0D4J5;A0A0E0I468;Q75W16	Phospho-2-dehydro-3-deoxyheptonate aldolase;Phospho-2-dehydro-3-deoxyheptonate aldolase;Phospho-2-dehydro-3-deoxyheptonate aldolase;Phospho-2-dehydro-3-deoxyheptonate aldolase 2, chloroplastic	DAHPS2 Os07g0622200 LOC_Os07g42960 P0594D10.136;Os07g0622200 Os07g0622200 OsJ_25169 OSNPB_070622200;OsI_26913	3.73193	0.455454	up	7.49336	5.59344	37487000	47730000	65539000	99642000	0	29477000	7.36194	7.4796	7.63854	8.10376	1	7.67656
1399	A0A0E0I477;Q7XI45	A0A0E0I477;Q7XI45	Uncharacterized protein;Signal peptidase complex-like protein DTM1	DTM1 Os07g0622900 LOC_Os07g43010 P0524E08.106	4.04973	0.116121	up	3.01782	1	0	12126000	10592000	0	0	0	1	4.03669	4.01678	1	1	1
1400	A3AVS2;Q7XUM2;Q01HN4;A2XVR4;Q0JBJ8;A0A0E0I484;A0A0E0I485;C7J4W6;A0A0N7KJE4;A0A0P0WCT4;Q9LIW2;A3BHF0;Q0DL71;A2XZS3;A0A0E0H8R4;Q69S68;A2YJ16;A0A0E0HXR6;Q6K4D2;B8BCP6;A0A0E0IL47;Q8LNT5;A0A0E0IUL7;A2Z8W6	A3AVS2;Q7XUM2;Q01HN4;A2XVR4;Q0JBJ8;A0A0E0I484;A0A0E0I485;C7J4W6;A0A0N7KJE4;A0A0P0WCT4;Q9LIW2;A3BHF0;Q0DL71;A2XZS3;A0A0E0H8R4;Q69S68;A2YJ16;A0A0E0HXR6;Q6K4D2;B8BCP6;A0A0E0IL47;Q8LNT5;A0A0E0IUL7;A2Z8W6	Uncharacterized protein;OSJNBa0074L08.3 protein;OSIGBa0115K01-H0319F09.18 protein;Uncharacterized protein;Os04g0528300 protein;Uncharacterized protein;Uncharacterized protein;Os07g0191600 protein (Fragment);Os04g0528300 protein (Fragment);Os04g0528300 prot	Os04g0528300 Os04g0528300 OSNPB_040528300;Os04g0528300 OSNPB_040528300;Os05g0120000 Os05g0120000 OsJ_16923 OSNPB_050120000;Os07g0191600 Os07g0191600 OSNPB_070191600;Os09g0472100 OJ1509_C06.9 OsJ_29719 OSNPB_090472100;OsI_16727;OsI_18236;OsI_25222;OsI_31728;OsI_34160;OSIGBa0115K01-H0319F09.18;OsJ_15543;OsJ_23407;OSJNBa0041P03.4 LOC_Os10g35180 Os10g0494300 OSNPB_100494300;OSJNBa0074L08.3;STR2 OSJNB…	4.33532	0.116125	up	3.11614	1	0	24910000	21009000	0	0	0	1	4.18856	4.15986	1	1	1
1401	Q7XKI6;Q01HN9;B9FG92;B8ASC1;A0A0E0I491;A0A0N7KJE3	Q7XKI6;Q01HN9;B9FG92;B8ASC1;A0A0E0I491	OSJNBa0038O10.22 protein;OSIGBa0115K01-H0319F09.13 protein;Uncharacterized protein;Uncharacterized protein;Uncharacterized protein	Os04g0527800 OSJNBa0038O10.22 OSNPB_040527800;Os04g0527800 OSNPB_040527800;OsI_16722;OSIGBa0115K01-H0319F09.13;OsJ_15539	81.724	1.59468e-08	up	7.35269	1	34453000	44804000	34268000	0	0	0	7.31381	7.44361	7.30065	1	1	1
1402	Q0D4G9;Q8LI32;B8B4V7;A0A0E0I4C3;A0A0E0HF82;A0A0E0HF81;A0A0E0HF80;A0A0E0HF79	Q0D4G9;Q8LI32;B8B4V7;A0A0E0I4C3;A0A0E0HF82;A0A0E0HF81;A0A0E0HF80;A0A0E0HF79	Os07g0626800 protein (Fragment);Putative oxidoreductase, FAD-binding;Uncharacterized protein;Uncharacterized protein;Uncharacterized protein;Uncharacterized protein;Uncharacterized protein;Uncharacterized protein	OJ1339_F05.130 OsJ_25202;Os07g0626800 Os07g0626800 OSNPB_070626800;OsI_26947	4.27362	0.116125	up	3.09546	1	19805000	0	18029000	0	0	0	4.15804	1	4.12834	1	1	1
1403	A0A0E0I4D1;Q7XI68;B9FUC9;B8B4W5	A0A0E0I4D1;Q7XI68;B9FUC9;B8B4W5	Uncharacterized protein;Os07g0627800 protein;Uncharacterized protein;Uncharacterized protein	OsI_26957;OsJ_25212;P0506F02.114 Os07g0627800 OSNPB_070627800	9.21907	1.71244e-09	up	4.20462	1	27523000	27344000	22602000	0	0	0	4.2248	4.2092	4.17986	1	1	1
1405	A0A0E0I4I5;B9FUE5;Q7XI55	A0A0E0I4I5;B9FUE5;Q7XI55	Uncharacterized protein;Uncharacterized protein;Os07g0632600 protein	OsJ_25249;P0519E12.120 Os07g0632600 OSNPB_070632600	5.71796	0.00188741	up	3.5155	1	3320700	5018800	5707500	0	0	0	2.82512	3.84422	3.87716	1	1	1
1409	A0A0E0I4T3;A2YP97	A0A0E0I4T3;A2YP97	Uncharacterized protein;Uncharacterized protein	OsI_27089	2.08849	0.373901	up	2.06246	1	22834000	0	0	0	0	0	4.18737	1	1	1	1	1
1411	Q7EYL4;A2YP92;A0A0E0I4W0	Q7EYL4;A2YP92;A0A0E0I4W0	Os07g0645300 protein;Uncharacterized protein;Uncharacterized protein	OsI_27085;P0503D09.101 Os07g0645300 OSNPB_070645300	2.08154	0.373901	up	2.05765	1	21240000	0	0	0	0	0	4.17296	1	1	1	1	1
1412	Q8H2T7;A0A0E0I4W1;A3BMS9;A2YP98;B7EAK9;A0A0P0X9A3	Q8H2T7;A0A0E0I4W1;A3BMS9;A2YP98;B7EAK9;A0A0P0X9A3	NADH dehydrogenase [ubiquinone] flavoprotein 1, mitochondrial;NADH dehydrogenase [ubiquinone] flavoprotein 1, mitochondrial;NADH dehydrogenase [ubiquinone] flavoprotein 1, mitochondrial;NADH dehydrogenase [ubiquinone] flavoprotein 1, mitochondrial;cDNA clo	Os07g0645400 OSNPB_070645400;OsI_27090;OsJ_25349;P0503D09.102 Os07g0645400 OSNPB_070645400	1.0022	0.979428	up	8.42157	8.41839	207790000	462120000	356550000	239720000	164540000	216200000	8.21678	8.58179	8.46613	8.47832	8.33717	8.4397
1414	A0A0E0I557;B8B5I7;A0A1D9CEX0;A0A0E0I558;Q69RJ0;B9FUN5;A0A0E0I559;O04187;A0A0P0X9S7;O04186;A0A0P0X9Q0;Q9ZRR9	A0A0E0I557;B8B5I7;A0A1D9CEX0;A0A0E0I558;Q69RJ0;B9FUN5;A0A0E0I559;O04187;A0A0P0X9S7	Uncharacterized protein;Uncharacterized protein;Chloroplast ferredoxin-dependent glutamate synthase;Uncharacterized protein;Ferredoxin-dependent glutamate synthase, chloroplastic;Uncharacterized protein;Uncharacterized protein;Fd-GOGAT protein (Fragment);O	GLU Os07g0658400 LOC_Os07g46460 OJ1477_F01.112 P0047B07.133;Os07g0658400 OSNPB_070658400;osGog;OsI_27183;OsJ_25434	1.52287	0.0162264	up	8.42727	7.82048	395690000	411890000	225820000	29648000	87038000	39099000	8.50866	8.52407	8.24909	7.63133	8.05136	7.77874
1416	A2YPL1;Q7EZZ0;A0A0E0I587;A3BN31	A2YPL1;Q7EZZ0;A0A0E0I587;A3BN31	Uncharacterized protein;Os07g0661100 protein;Uncharacterized protein;Uncharacterized protein	OsI_27203;OsJ_25452;P0496C02.125 Os07g0661100 OSNPB_070661100	1.99353	0.373901	up	1.99532	1	0	0	9439900	0	0	0	1	1	3.98597	1	1	1
1417	P29545;A2YPM1;A0A0E0I5A4;A3BN41	P29545;A2YPM1;A0A0E0I5A4;A3BN41	Elongation factor 1-beta;Elongation factor beta-1;Uncharacterized protein;Uncharacterized protein	Os07g0662500 LOC_Os07g46750 P0453E03.116;OsI_27215;OsJ_25462	126.237	8.76077e-06	up	7.97999	1	282130000	51707000	162010000	0	0	0	8.3334	7.51405	8.09252	1	1	1
1418	A0A0P0XA74;Q7F0M7;B8B5T2;A0A0E0I5E7;A0A0E0I5E5;A0A0E0I5E6	A0A0P0XA74;Q7F0M7;B8B5T2;A0A0E0I5E7;A0A0E0I5E5;A0A0E0I5E6	Os07g0668200 protein (Fragment);Os07g0668200 protein;Uncharacterized protein;Uncharacterized protein;Uncharacterized protein;Uncharacterized protein	Os07g0668200 OSNPB_070668200;OsI_27260;P0450A04.139 P0625E02.106 Os07g0668200 OsJ_25503 OSNPB_070668200	8.87403	3.17054e-09	up	4.14959	1	16858000	23068000	20892000	0	0	0	4.12025	4.17048	4.15804	1	1	1
1419	B9FUS5;B8B5T6;Q8H3Q7;A0A0E0I5G2;A0A0P0XA52;Q8RVS5;Q9XFD3	B9FUS5;B8B5T6;Q8H3Q7;A0A0E0I5G2;A0A0P0XA52	Xylose isomerase;Xylose isomerase;Xylose isomerase;Xylose isomerase;Xylose isomerase (Fragment)	Os07g0669100 OSNPB_070669100;OsI_27268;OsJ_25511;P0625E02.119 Os07g0669100 OSNPB_070669100	6.5013	0.326787	up	8.53761	5.83688	428090000	430930000	389460000	0	173970000	114300000	8.54381	8.55742	8.51161	1	8.35376	8.15689
1420	A0A0P0XA43;B9FUS8;A2YPS3;A0A0E0I5G7;Q8H3P9	A0A0P0XA43;B9FUS8;A2YPS3;A0A0E0I5G7;Q8H3P9	Potassium transporter (Fragment);Potassium transporter;Potassium transporter;Potassium transporter;Potassium transporter 7	HAK7 Os07g0669700 LOC_Os07g47350 P0625E02.129;Os07g0669700 OSNPB_070669700;OsI_27274;OsJ_25516	1.52857	0.373901	up	1.61219	1	3590000	0	0	0	0	0	2.83656	1	1	1	1	1
1423	B9FUU7;Q6F3E9;A2YPV1;A0A0E0I5K7	B9FUU7;Q6F3E9;A2YPV1;A0A0E0I5K7	Uncharacterized protein;Os07g0674100 protein;Uncharacterized protein;Uncharacterized protein	OsI_27304;OsJ_25550;UXS-6 Os07g0674100	7.66712	1.01686e-09	up	3.93868	1	7771200	7337000	7631700	0	0	0	3.95902	3.92331	3.93372	1	1	1
1424	A6N0Q9;Q6YSX0;A2YPV2;A0A0E0I5K8	A6N0Q9;Q6YSX0;A2YPV2;A0A0E0I5K8	60S ribosomal protein l22-2 (Fragment);Os07g0674200 protein;Uncharacterized protein;Uncharacterized protein	OsI_27305;P0618H09.1 Os07g0674200 OsJ_25551 OSNPB_070674200 P0037D09.3	1.29094	0.136017	up	8.65091	8.28249	593550000	566250000	501430000	77570000	114450000	395450000	8.66469	8.67154	8.6165	8.00812	8.17467	8.66469
1425	A0A0E0I5Q4;A0A0E0I5Q3;Q7XIV4;B8B656;A3BNF9	A0A0E0I5Q4;A0A0E0I5Q3;Q7XIV4;B8B656;A3BNF9	Alpha-galactosidase;Alpha-galactosidase;Alpha-galactosidase;Alpha-galactosidase;Alpha-galactosidase	Os07g0679300 Os07g0679300 OJ1205_F02.7 OJ1409_C08.26 OSNPB_070679300;OsI_27343;OsJ_25590	1.93672	0.373901	up	1.95362	1	0	5491800	0	0	0	0	1	3.86085	1	1	1	1
1426	Q7XHW7;A2YPZ9;A0A0E0I5R7	Q7XHW7;A2YPZ9;A0A0E0I5R7	Os07g0681100 protein;Uncharacterized protein;Uncharacterized protein	Os07g0681100 OsJ_25602 OSJNBa0008J01.18 OSNPB_070681100;OsI_27356	4.07122	0.116307	up	3.02546	1	15972000	9017000	0	0	0	0	4.10475	3.97164	1	1	1	1
1429	A0A0E0I5Z0;Q69UZ3;A2YQ56;A0A0E0I5Z1;A3BNM4	A0A0E0I5Z0;Q69UZ3;A2YQ56;A0A0E0I5Z1;A3BNM4	Lon protease homolog, mitochondrial;Lon protease homolog, mitochondrial;Lon protease homolog, mitochondrial;Lon protease homolog, mitochondrial;Lon protease homolog, mitochondrial	Os07g0689300 LOC_Os07g48960 OJ1165_F02.125 P0597G07.108;OsI_27415;OsJ_25659	2.11457	0.632605	up	4.17114	3.09078	22573000	22913000	20983000	0	11051000	0	4.18462	4.16987	4.15894	1	7.27234	1
1430	A0A0P0XAE2;Q7XI67;B8B6A3;A0A0E0I611;A0A0E0I610	A0A0P0XAE2;Q7XI67;B8B6A3;A0A0E0I611;A0A0E0I610	Os07g0691200 protein;Os07g0691200 protein;Uncharacterized protein;Uncharacterized protein;Uncharacterized protein	Os07g0691200 OSNPB_070691200;OsI_27428;P0034A04.101-1 P0597G07.131-1 Os07g0691200 OsJ_25672 OSNPB_070691200	1.95842	0.373901	up	1.96969	1	6319200	0	0	0	0	0	3.90906	1	1	1	1	1
1433	Q6Z3X5;A0A0E0I649;A0A0N7KP44	Q6Z3X5;A0A0E0I649	Os07g0695800 protein;Uncharacterized protein	Os07g0695800 OSNPB_070695800;Os07g0695800 OSNPB_070695800 P0627E10.28	18.9123	0.0150125	up	5.24125	1	34572000	28659000	23274000	0	0	0	7.31666	4.22127	4.18583	1	1	1
1434	Q6Z1Y9;A2YQB6;A0A0E0I683	Q6Z1Y9;A2YQB6;A0A0E0I683	Os08g0101700 protein;Uncharacterized protein;Uncharacterized protein	Os08g0101700 Os08g0101700 B1147B12.18 OsJ_25723 OSNPB_080101700 P0015C07.1;OsI_27480	9.19162	0.162334	up	4.20032	1	45487000	0	17579000	0	0	0	7.4796	1	4.12136	1	1	1
1436	B9FYP7;B8BA44;A0A0E0I6D8;A0A0P0XB70;P49030;B8BP61;A0A0E0J937	B9FYP7;B8BA44;A0A0E0I6D8;A0A0P0XB70;P49030;B8BP61;A0A0E0J937	Uncharacterized protein;Uncharacterized protein;Uncharacterized protein;Protein mago nashi homolog 1;Protein mago nashi homolog 2;Uncharacterized protein;Uncharacterized protein	MAGO1 Os08g0107900 P0450B04.29;MAGO2 Os12g0287200 LOC_Os12g18880 OsJ_35789;OsI_27536;OsI_38020;OsJ_25767	1.70871	0.769185	up	6.24893	5.47602	31609000	26475000	35004000	37353000	34437000	0	7.23122	4.20175	7.31381	7.74317	7.68489	1
1437	Q6ZC70;A2YQI0;A0A0E0I6F0;A0A0P0XBM6;A0A0E0G6B8;A0A0E0G6B7	Q6ZC70;A2YQI0;A0A0E0I6F0;A0A0P0XBM6	Os08g0109200 protein;Uncharacterized protein;Uncharacterized protein;Os08g0109200 protein (Fragment)	Os08g0109200 OsJ_25774 P0007D08.11;Os08g0109200 OSNPB_080109200;OsI_27546	5.32762	0.350751	up	7.98443	5.57094	95958000	151450000	156620000	50524000	0	47032000	7.83432	8.05487	8.06409	7.85806	1	7.85474
1439	Q6ZCC6;A2YQK7;A0A0E0I6I8	Q6ZCC6;A2YQK7;A0A0E0I6I8	Os08g0112600 protein;Uncharacterized protein;Uncharacterized protein	Os08g0112600 OsJ_25798 OSNPB_080112600 P0498H04.23;OsI_27573	37.2356	0.000966675	up	6.21861	1	29390000	35382000	29009000	0	0	0	6.16667	7.28414	5.20502	1	1	1
1440	Q6ZCC4;A2YQL0;A0A0E0I6J1	Q6ZCC4;A2YQL0;A0A0E0I6J1	Succinate dehydrogenase subunit 6, mitochondrial;Uncharacterized protein;Uncharacterized protein	OsI_27576;SDH6 Os08g0112800 LOC_Os08g02080 OsJ_25800 P0498H04.25	7.97441	2.55116e-07	up	3.99538	1	13377000	7143400	10045000	0	0	0	4.06627	3.91769	4.00217	1	1	1
1441	A0A0E0I6J4;Q0J8G4;A2YQL4;A0A0P0XB45	A0A0E0I6J4;Q0J8G4;A2YQL4;A0A0P0XB45	Uncharacterized protein;Fructokinase-2;Fructokinase-2;Os08g0113100 protein (Fragment)	FRK2 FKII Os08g0113100 LOC_Os08g02120 OsJ_024778 P0498H04.29;FRK2 FKII OsI_026607;Os08g0113100 OSNPB_080113100	1.00781	0.966131	up	8.31058	8.29936	275880000	265690000	245140000	271980000	47444000	309400000	8.32245	8.31707	8.29222	8.51161	7.80469	8.58179
1442	Q69UI8;A2YQN3;A0A0E0I6L3	Q69UI8;A2YQN3;A0A0E0I6L3	Os08g0116500 protein;Uncharacterized protein;Uncharacterized protein	Os08g0116500 OsJ_25823 OSNPB_080116500 P0470F10.11;OsI_27602	3.92643	0.116355	up	2.97322	1	11711000	6167500	0	0	0	0	4.03227	3.88738	1	1	1	1
1444	Q84VG0;A2YQP2;A0A0E0I6N5	Q84VG0;A2YQP2;A0A0E0I6N5	Probable calcium-binding protein CML7;Uncharacterized protein;Uncharacterized protein	CML7 Os08g0117400 LOC_Os08g02420 OsJ_024805 P0470F10.20;OsI_27611	3.2432	0.556847	up	5.16989	3.47247	27052000	31519000	25518000	0	206810000	0	4.21962	7.08375	4.20631	1	8.41742	1
1445	Q9S827;Q9S7D3;A3BP48;A2YQQ8;A0A0E0I6Q4	Q9S827;Q9S7D3;A3BP48;A2YQQ8;A0A0E0I6Q4	Succinate dehydrogenase [ubiquinone] iron-sulfur subunit 1, mitochondrial;Succinate dehydrogenase [ubiquinone] iron-sulfur subunit, mitochondrial;Succinate dehydrogenase [ubiquinone] iron-sulfur subunit, mitochondrial;Succinate dehydrogenase [ubiquinone] i	OsI_27631;OsJ_25852;rps14 OJ1005_B05.29-2 Os08g0120000 OSNPB_080120000;SDH2-1 Os08g0120000 LOC_Os08g02640 OJ1005_B05.29-1	20.3653	0.116667	up	5.34804	1	0	35263000	82523000	0	0	0	1	7.27928	7.76484	1	1	1
1446	A0A0P0XB48;Q6YPF2;A2YQR1;A0A0E0I6Q9;A0A0P0XBB0	A0A0P0XB48;Q6YPF2;A2YQR1;A0A0E0I6Q9;A0A0P0XBB0	Os08g0120500 protein (Fragment);Os08g0120500 protein;Uncharacterized protein;Uncharacterized protein;Os08g0120500 protein (Fragment)	Os08g0120500 Os08g0120500 B1203H11.9 OsJ_25855 OSNPB_080120500;Os08g0120500 OSNPB_080120500;OsI_27634	1.89249	0.373901	up	1.92028	1	0	3533700	0	0	0	0	1	3.76085	1	1	1	1
1447	Q85V22;A0A0E0I6S3;A2ZJE5;A0A0E0J8K4;Q2QV42;Q6ZK52;B8BAF0	Q85V22;A0A0E0I6S3;A2ZJE5;A0A0E0J8K4;Q2QV42;Q6ZK52;B8BAF0	Histidine amino acid transporter;Uncharacterized protein;Uncharacterized protein;Uncharacterized protein;Lysine and histidine specific transporter, putative, expressed;Os08g0127100 protein;Uncharacterized protein	ht;LOC_Os12g14100 Os12g0244400 OsJ_35704 OSNPB_120244400;Os08g0127100 Os08g0127100 OJ1163_G08.25 OsJ_25900 OSNPB_080127100;OsI_27668;OsI_37940	2.10317	0.373901	up	2.07257	1	0	28114000	0	0	0	0	1	4.2177	1	1	1	1
1451	A3ARI7;A0A0E0I6X3;A2XQW4	A3ARI7;A0A0E0I6X3;A2XQW4	Uncharacterized protein;Uncharacterized protein;Uncharacterized protein	OsI_15032;OsJ_13980	8.81137	3.39518e-09	up	4.13937	1	18102000	17139000	21614000	0	0	0	4.13769	4.11372	4.16669	1	1	1
[truncated: 550 more rows]

## Sheet: dn.TQ_vs_nal8
TQ vs nal8.down Column A: id, unique identifier assigned. Column B: Protein IDs, protein identifiers. Column C: Majority protein IDs, Majority protein identifiers. Column D: Protein names, protein names. Column E: Gene name, protein associated gene names. Column F~J: Statistics results. Column K~P: LFQ intensity, label-free quantitative intensity of each sample. Column Q~V: log10 transformed and …
[truncated: 838 more rows]
